# Supplementary material for: Evolution and diversity of copy number variation in the great ape lineage
Source: HighWire-hosted journal article supplement (doi:10.1101/gr.158543.113), 2013-07-03
Supplement: Supplemental_Material.docx [file Supplemental_Material.docx]

**Supplementary Material**

**Evolution and diversity of copy number variation in the great ape lineage**

Peter H. Sudmant, John Huddleston, Claudia R. Catacchio, Maika Malig, LaDeana W. Hillier, Carl Baker, Kiana Mohajeri, Ivanela Kondova, Ronald E. Bontrop, Stephan Persengiev, Francesca Antonacci, Mario Ventura, Javier Prado-Martinez, Tomas Marques-Bonet, and Evan E. Eichler

Additional resources available online: **http://eichlerlab.gs.washington.edu/greatape-cnv**

Section 1: Genome mapping and quality control 1

Section 2: Nonhuman primate reference genome comparisons 8

Section 3: Copy number variant calling methods 9

Section 4: Validations 14

Section 5: Lineage-specific great ape segmental duplications and deletions 17

Section 6: Lineage-specific deletions and diversity of sequence not represented in the human reference genome 24

Section 7: Gene duplication analysis 32

Section 8: Distribution of duplication and deletion events 50

Section 9: Rates of segmental duplication and deletion and underlying genes 56

Section 10: Copy number variation and duplication diversity 60

Section 11: A human genomic disorder identified in a nonhuman primate 70

Section 12: References 75

# Section 1: Genome mapping and quality control

**Genome mapping for read-depth-based copy number analysis:** Genomes were mapped to the human reference assembly Build 36 (UCSC HG18) using the mrsfastc mapping software(Sudmant et al. 2010; Hach et al. 2010). Reads were first divided into their 36 bp constituents and mapped with a maximum edit distance of 2 to a repeat-masked reference. Subdividing reads into their 36 bp constituents served firstly to allow us to align reads with an ungapped alignment algorithm (mrsfastc)quickly. Additionally, subdividing reads served to normalize the varied read lengths between genomes. Masking was performed with RepeatMasker (default UCSC masking version 3 Repeat Masking) and Tandem Repeats Finder(Marques-Bonet et al. 2009; Benson 1999; Cheng et al. 2005) using the following parameters: *match 2, mismatch 3, delta 5, PM 80, PI 10, minscore 30, maxperiod 1000*. Masked regions were extended out by 36 bp on either side after mapping to eliminate mapping edge effects adjacent to masked regions.

**Read-depth-based GC correction and copy number prediction:** Copy numbers were estimated in tiled 500 bp, 1 kbp, and 3 kbp windows of unmasked sequence across the genome of each individual as described in Sudmant *et al* 2010(1000 Genomes Project Consortium et al. 2012; Sudmant et al. 2010). First, a GC correction step was performed to eliminate biases in sequence coverage introduced during library construction and associated with the GC content of loci. For each individual a multiplicative GC correction factor was calculated and applied to the genome. This correction factor was calculated by determining the average read-depth across putative invariant diploid regions of the human genome (potentially copy number variable loci subtracted from HG18, namely, the Database of Genomic Variants, gaps, segmental duplications (SDs), and copy number variants identified by Conrad *et al*(Meyer et al. 2012; Conrad et al. 2010) binned by GC content as computed in 401 base-pair windows across the genome. A correction factor kGC was then calculated as kGC=μtotal/μGC where μtotal is the total average read-depth and μGC is the read-depth within a particular GC content bin. The corrected read-depth at a base *x* where *d(x)* is the read-depth at base *x* is then calculated as *d’(x) = d(x)*kGC*where k­GC is chosen to match the particular GC content at base *x.* Copy numbers were then estimated by using a linear regression model fit to regions of known copy number 2 in all primates.

**Genome-wide copy number 2 assessment:** Read-depth-based copy number estimates are based on the assumption that the number of reads shotgun sequenced over a particular locus will be directly proportional to the copy number of that locus. As such, extreme biases introduced during sequencing and library construction or resulting from DNA degradation may reduce the power of this technique even after corrections are applied. To test the quality of each of our genomes, we focused on 4836 regions encompassing ~1.1 Gbp of sequence, which we predict to be largely devoid of any structural variation and thus fixed at copy number 2. These loci were selected by removing from the human reference genome regions of known or likely structural variation, including the Database of Genomic Variation, genomic gaps, SDs, and variants detected by Conrad *et al*(Miller et al. 1993; Conrad et al. 2010)*.* We then further eliminated any regions <100 kbp in length to avoid over-fragmenting. The resulting set of loci should largely be fixed at copy number 2 and invariant among all human genomes. Among different species of nonhuman primates, some these loci may indeed be copy number variable. However, we can assume that not only will the number of such variable sites will be low but that among individuals of the same species the same number of regions will be variable and therefore the total number of invariant loci within a species should be consistent. We thus estimated the copy number of these loci in tiled 3 kbp windows of unmasked sequence. 131242 such windows were considered within each individual genome (**Figure 1.1**). Additionally, the proportion of loci correctly predicted as copy number 2 as a function of the GC content of a region was also quantified to assess the effect of library construction induced GC biases (**Figure 1.2**).

**Figure 1.1: 131,242 3 kbp windows encompassing of 1.1 Gbp of putative diploid invariant sequence were analyzed in each sequenced genome. The number of 3 kbp windows correctly determined as copy number 2 is displayed for each genome sorted and colored by species and subspecies. The black line indicates a cutoff of 120,000, below which corresponds to genomes with poor copy number estimation across the entire spectrum of GC content. Genomes failing this cutoff are plotted with dotted lines in Figure 1.2 below.**

**Figure 1.2: The fraction of 3 kbp windows correctly determined to be copy number 2 is plotted as a function of GC content grouped and colored by subspecies. Regions of increased GC content are expected to have reduced coverage and increased variance and, thus, are more difficult to accurately assay. Reduced power to accurately estimate copy number across the entire spectrum of GC content is, however, an indication of a genome that has been subject to multiple confounding factors during sequencing or poor starting DNA quality. Genomes exhibiting a trend of reduced copy number prediction power across the entire spectrum of GC content were discarded and are plotted with dotted lines. These genomes correspond to those falling below the cutoff threshold indicated in Figure 1.1 and are listed in Table 1.1.**

| **Table 1.1: Individuals filtered out by copy 2 region analyses (23).** | | |
| --- | --- | --- |
| **name** | **sub_species** | **fraction of diploid regions correctly estimated** |
| A914_Hortense | BONOBO | 0.59 |
| A924_Chipita | BONOBO | 0.80 |
| A959_Julie | CENTRAL_CHIMPANZEE | 0.66 |
| A957_Vaillant | CENTRAL_CHIMPANZEE | 0.73 |
| A913_Eddy | EASTERN_CHIMPANZEE | 0.59 |
| A910_Bwambale | EASTERN_CHIMPANZEE | 0.90 |
| A956_Jimmie | WESTERN_CHIMPANZEE | 0.81 |
| Victoria | EASTERN_LOWLAND_GORILLA | 0.70 |
| X00113_Freddy | WESTERN_LOWLAND_GORILLA | 0.19 |
| A937_Kolo | WESTERN_LOWLAND_GORILLA | 0.90 |
| X00104_Mary_Ellen | WESTERN_LOWLAND_GORILLA | 0.47 |
| A931_Banjo | WESTERN_LOWLAND_GORILLA | 0.59 |
| A961_Yaounde | WESTERN_LOWLAND_GORILLA | 0.35 |
| A930_Sandra | WESTERN_LOWLAND_GORILLA | 0.84 |
| A941_Sari | BORNEAN_ORANGUTAN | 0.82 |
| A938_Lotti | BORNEAN_ORANGUTAN | 0.87 |
| A940_Temmy | BORNEAN_ORANGUTAN | 0.88 |
| A946_Kajan | BORNEAN_ORANGUTAN | 0.48 |
| A952_Buschi | SUMATRAN_ORANGUTAN | 0.86 |
| A948_Kiki | SUMATRAN_ORANGUTAN | 0.88 |
| A955_Suma | SUMATRAN_ORANGUTAN | 0.73 |
| A964_Rochelle | SUMATRAN_ORANGUTAN | 0.82 |
| A950_Babu | SUMATRAN_ORANGUTAN | 0.78 |

We previously reported that at regions of increased GC content, Illumina-sequenced genomes often demonstrate reduced and more variable depth-of-coverage(Olson 1999; Sudmant et al. 2010; Alkan et al. 2009). To a certain degree this can be corrected for and additionally only a small fraction of the human genome lies within these high GC regions; >90% of the human genome is at <50% GC **(Figure 1.3)**. 4.2%, 1.7% and 0.056% of the genome are at >55%, >60% and >65% GC content, respectively. Our analysis of those 1.1 Gbp of putative copy number 2 loci among all of the genomes indicated, however, that a small fraction of these genomes displayed reduced power to accurately estimate copy number across the entire spectrum of GC content **(Figure 1.2** dashed lines, **Table 1.1)**. The genomes demonstrating this trend corresponded to those for which the fewest number of copy number 2 loci were accurately assessed **(Figure 1.1)** and thus a cutoff of correctly estimating the copy of 120,000/131,242 windows (91.4%) was selected to flag any genomes of reduced quality due to processes in the library construction and sequencing or perhaps in the quality of the DNA sequenced. These genomes (n=23) were discarded from the read-depth-based analyses of copy number and SDs. Additionally, regions of extreme GC content (>0.57% GC corresponding to 69,119,920 bp, 2.23%) were masked from the analysis to avoid regions of potential biased sequencing.

**Figure 1.3: A curve of the fraction of base pairs represented in the human genome cumulatively as a function of GC content. >90% of the human genome is represented at 50% GC or less as exhibited in the shaded green portion below the curve.**

**Genomes passing quality-control dataset:** In total, 97 genomes were assessed in this study, including 10 human genomes and the genome of an archaic hominid Denisovan individual (referred to as Homo Denisova here). 75 of the individuals assessed here were sequenced as part of the Great Ape Genome Project—of which 13 showed low levels of contamination (Prado/Sudmant 2012, under review, **Table 1.2**). Ten of the individuals demonstrated <2% contamination while the remaining three showed <4% contamination. Our read-depth-based copy number prediction methodology is highly robust to such low levels of contamination as read-depth typically fluctuates with a mean and variance proportional to the underlying copy number and sequencing coverage of the sample(Brawand et al. 2011; Scally et al. 2012; Sudmant et al. 2010; Ventura et al. 2011; Meyer et al. 2012; Locke et al. 2011). To ensure no biases were introduced, all analyses which may be sensitive to cross-species contamination were performed/confirmed in the subset of non-contaminated individuals.

**Table 1.2: Individuals assessed in this study. In addition to 75 genomes sequenced as part of the Great Ape Diversity project, 22 previously published samples were analyzed**(Siepel et al. 2005; Scally et al. 2012; Ventura et al. 2011; Meyer et al. 2012; Locke et al. 2011)**.**

| Species/sub-species | individual | Source | estimated % contamination |
| --- | --- | --- | --- |
| Gorilla beringei graueri | 9732_Mkubwa | GAGP |  |
| Gorilla beringei graueri | A929_Kaisi | GAGP | 0.2 |
| Gorilla beringei graueri | Mukisi | GAGP |  |
| Gorilla gorilla diehli | B646_Nyango | GAGP |  |
| Gorilla gorilla gorilla | 9749_Kowali | GAGP |  |
| Gorilla gorilla gorilla | 9750_Azizi | GAGP |  |
| Gorilla gorilla gorilla | 9751_Bulera | GAGP |  |
| Gorilla gorilla gorilla | 9752_Suzie | GAGP |  |
| Gorilla gorilla gorilla | 9753_Kokomo | GAGP |  |
| Gorilla gorilla gorilla | A932_Mimi | GAGP | 0.093 |
| Gorilla gorilla gorilla | A933_Dian | GAGP |  |
| Gorilla gorilla gorilla | A934_Delphi | GAGP | 0.06 |
| Gorilla gorilla gorilla | A935_Fritz | GAGP | 3.8 |
| Gorilla gorilla gorilla | A936_Coco | GAGP |  |
| Gorilla gorilla gorilla | A962_Amani | GAGP |  |
| Gorilla gorilla gorilla | B642_Akiba_Beri | GAGP |  |
| Gorilla gorilla gorilla | B643_Choomba | GAGP |  |
| Gorilla gorilla gorilla | B644_Paki | GAGP |  |
| Gorilla gorilla gorilla | B647_Anthal | GAGP |  |
| Gorilla gorilla gorilla | B650_Katie | GAGP |  |
| Gorilla gorilla gorilla | Kamilah | Scally *et al, 2012* |  |
| Gorilla gorilla gorilla | KB3782_Vila | GAGP |  |
| Gorilla gorilla gorilla | KB3784_Dolly | GAGP |  |
| Gorilla gorilla gorilla | KB4986_Katie | GAGP |  |
| Gorilla gorilla gorilla | KB5792_Carolyn | GAGP |  |
| Gorilla gorilla gorilla | KB5852_Helen | GAGP |  |
| Gorilla gorilla gorilla | KB6039_Oko | GAGP |  |
| Gorilla gorilla gorilla | KB7973_Porta | GAGP |  |
| Gorilla gorilla gorilla | Kwan | Ventura *et al, 2011* |  |
| Gorilla gorilla gorilla | Snowflake | GAGP |  |
| Gorilla gorilla gorilla | X00108_Abe | GAGP |  |
| Gorilla gorilla gorilla | X00109_Tzambo | GAGP |  |
| Homo denisova | Denisova_30x | Meyer *et al,* 2012 |  |
| Homo sapiens | Dai_HGDP01307 | Meyer *et al,* 2012 |  |
| Homo sapiens | French_HGDP00521 | Meyer *et al,* 2012 |  |
| Homo sapiens | Han_HGDP00778 | Meyer *et al,* 2012 |  |
| Homo sapiens | Karitiana_HGDP00998 | Meyer *et al,* 2012 |  |
| Homo sapiens | Madenka_HGDP01284 | Meyer *et al,* 2012 |  |
| Homo sapiens | Mbuti_HGDP00456 | Meyer *et al,* 2012 |  |
| Homo sapiens | Papuan_HGDP00542 | Meyer *et al,* 2012 |  |
| Homo sapiens | San_HGDP01029 | Meyer *et al,* 2012 |  |
| Homo sapiens | Sardinian_HGDP00665 | Meyer *et al,* 2012 |  |
| Homo sapiens | Yoruba_HGDP00927 | Meyer *et al,* 2012 |  |
| Pan paniscus | 9731_LB502 | GAGP |  |
| Pan paniscus | A915_Kosana | GAGP |  |
| Pan paniscus | A917_Dzeeta | GAGP |  |
| Pan paniscus | A918_Hermien | GAGP |  |
| Pan paniscus | A919_Desmond | GAGP |  |
| Pan paniscus | A920_Kidogo | GAGP |  |
| Pan paniscus | A922_Catherine | GAGP |  |
| Pan paniscus | A923_Kombote | GAGP |  |
| Pan paniscus | A925_Bono | GAGP |  |
| Pan paniscus | A926_Natalie | GAGP |  |
| Pan paniscus | A927_Salonga | GAGP |  |
| Pan paniscus | A928_Kumbuka | GAGP | 0.6 |
| Pan paniscus | A951_Pongo | GAGP |  |
| Pan paniscus | X00095_Kakowet | GAGP | 0.018 |
| Pan troglodytes ellioti | Akwaya_Jean | GAGP |  |
| Pan troglodytes ellioti | Banyo | GAGP |  |
| Pan troglodytes ellioti | Basho | GAGP |  |
| Pan troglodytes ellioti | Damian | GAGP |  |
| Pan troglodytes ellioti | Julie | GAGP |  |
| Pan troglodytes ellioti | Kopongo | GAGP |  |
| Pan troglodytes ellioti | Koto | GAGP |  |
| Pan troglodytes ellioti | Paquita | GAGP |  |
| Pan troglodytes ellioti | Taweh | GAGP |  |
| Pan troglodytes ellioti | Tobi | GAGP |  |
| Pan troglodytes schweinfurthii | 100037_Vincent | GAGP |  |
| Pan troglodytes schweinfurthii | 100040_Andromeda | GAGP | 0.8 |
| Pan troglodytes schweinfurthii | 9729_Harriet | GAGP |  |
| Pan troglodytes schweinfurthii | A911_Kidongo | GAGP |  |
| Pan troglodytes schweinfurthii | A912_Nakuu | GAGP | 0.8 |
| Pan troglodytes schweinfurthii | Yolanda | GAGP | 2 |
| Pan troglodytes troglodytes | A958_Doris | GAGP |  |
| Pan troglodytes troglodytes | A960_Clara | GAGP |  |
| Pan troglodytes verus | 9668_Bosco | GAGP |  |
| Pan troglodytes verus | 9730_Donald | GAGP |  |
| Pan troglodytes verus | A907_Susie_A | GAGP | 3.2 |
| Pan troglodytes verus | Clint | GAGP |  |
| Pan troglodytes verus | X00100_Koby | GAGP |  |
| Pongo abelii | A947_Elsi | GAGP | 0.9 |
| Pongo abelii | A949_Dunja | GAGP |  |
| Pongo abelii | A953_Vicki | GAGP | 3.8 |
| Pongo abelii | KB4361_Dennis | Locke *et al*, 2011 |  |
| Pongo abelii | KB4661_Dolly | Locke *et al*, 2011 |  |
| Pongo abelii | KB5883_Likoe | Locke *et al*, 2011 |  |
| Pongo abelii | KB9258_Bubbles | Locke *et al*, 2011 |  |
| Pongo abelii | SB550_Sibu | GAGP |  |
| Pongo pygmaeus | A939_Nonja | GAGP |  |
| Pongo pygmaeus | A942_Gusti | GAGP | 1.2 |
| Pongo pygmaeus | A943_Tilda | GAGP |  |
| Pongo pygmaeus | A944_Napoleon | GAGP |  |
| Pongo pygmaeus | KB4204_Dinah | Locke *et al*, 2011 |  |
| Pongo pygmaeus | KB5404_Billy | Locke *et al*, 2011 |  |
| Pongo pygmaeus | KB5405_Louis | Locke *et al*, 2011 |  |
| Pongo pygmaeus | KB5406_Doris | Locke *et al*, 2011 |  |
| Pongo pygmaeus | KB5543_Baldy | Locke *et al*, 2011 |  |

**Table 1.3: Coverage of individuals assessed in this study. Coverage calculations are shown for bwa and mrsfast kmer mappings.**

| indiv | bwa coverage | kmer-coverage |
| --- | --- | --- |
| Denisova_30x | - | 23.464668 |
| Gorilla_beringei_graueri-9732_Mkubwa | 15.22 | 7.5223 |
| Gorilla_beringei_graueri-A929_Kaisi | 27.095 | 15.252012 |
| Gorilla_gorilla_dielhi-B646_Nyango | 19.3176 | 14.538121 |
| Gorilla_gorilla_gorilla-B642_Akiba_Beri | 17.2405 | 12.863963 |
| Gorilla_gorilla_gorilla-B643_Choomba | 18.8362 | 13.976078 |
| Gorilla_gorilla_gorilla-B644_Paki | 18.7551 | 13.912575 |
| Gorilla_gorilla_gorilla-B647_Anthal | 17.8673 | 13.23363 |
| Gorilla_gorilla_gorilla-B650_Katie | 16.4672 | 12.118194 |
| Gorilla_gorilla_gorilla-9749_Kowali | 16.1971 | 11.872634 |
| Gorilla_gorilla_gorilla-9750_Azizi | 16.0982 | 9.904 |
| Gorilla_gorilla_gorilla-9751_Bulera | 16.1769 | 11.951256 |
| Gorilla_gorilla_gorilla-9752_Suzie | 16.4371 | 12.025414 |
| Gorilla_gorilla_gorilla-9753_Kokomo | 13.4676 | 9.667402 |
| Gorilla_gorilla_gorilla-A932_Mimi | 24.7175 | 1.833891 |
| Gorilla_gorilla_gorilla-A933_Dian | 26.2103 | 22.277507 |
| Gorilla_gorilla_gorilla-A934_Delphi | 30.2397 | 23.113322 |
| Gorilla_gorilla_gorilla-A935_Fritz | 26.1051 | 7.291716 |
| Gorilla_gorilla_gorilla-A936_Coco | 22.2133 | 16.636503 |
| Gorilla_gorilla_gorilla-A962_Amani | 33.9349 | 23.197861 |
| Gorilla_gorilla_gorilla-Snowflake | 18.9214 | 12.456781 |
| Gorilla_gorilla_gorilla-X00108_Abe | 15.6194 | 8.953561 |
| Gorilla_gorilla_gorilla-X00109_Tzambo | 18.5012 | 11.487812 |
| Homo_sapiens-Dai_HGDP01307 | 19.2118 | 9.009638 |
| Homo_sapiens-French_HGDP00521 | 23.5054 | 12.040849 |
| Homo_sapiens-Han_HGDP00778 | - | 10.267159 |
| Homo_sapiens-Karitiana_HGDP00998 | 17.6082 | 7.576881 |
| Homo_sapiens-Madenka_HGDP01284 | 22.5465 | 11.475714 |
| Homo_sapiens-Mbuti_HGDP00456 | 15.8098 | 8.238722 |
| Homo_sapiens-Papuan_HGDP00542 | 16.2915 | 8.487436 |
| Homo_sapiens-San_HGDP01029 | 32.8205 | 14.390751 |
| Homo_sapiens-Sardinian_HGDP00665 | 21.9033 | 9.473815 |
| Homo_sapiens-Yoruba_HGDP00927 | 28.5036 | 14.729003 |
| Pan_paniscus-9731_LB502 | 9.66735 | 7.051574 |
| Pan_paniscus-A915_Kosana | 37.5078 | 28.006446 |
| Pan_paniscus-A917_Dzeeta | 39.4451 | 30.510164 |
| Pan_paniscus-A918_Hermien | 38.5 | 28.862005 |
| Pan_paniscus-A919_Desmond | 39.6459 | 24.840106 |
| Pan_paniscus-A920_Kidogo | 26.732 | 16.105185 |
| Pan_paniscus-A922_Catherine | 23.424 | 17.85244 |
| Pan_paniscus-A923_Kombote | 27.2995 | 26.391115 |
| Pan_paniscus-A925_Bono | 27.0355 | 16.973132 |
| Pan_paniscus-A926_Natalie | 28.0149 | 26.687373 |
| Pan_paniscus-A927_Salonga | 22.9217 | 14.590245 |
| Pan_paniscus-A928_Kumbuka | 30.7078 | 26.832489 |
| Pan_paniscus-A951_Pongo | 32.7053 | 24.546877 |
| Pan_paniscus-X00095_Kakowet | 18.2247 | 11.423614 |
| Pan_troglodytes_ellioti-Akwaya_Jean | 22.4677 | 5.745486 |
| Pan_troglodytes_ellioti-Banyo | 9.91445 | 6.682296 |
| Pan_troglodytes_ellioti-Basho | 14.8194 | 6.699436 |
| Pan_troglodytes_ellioti-Damian | 20.5135 | 4.298133 |
| Pan_troglodytes_ellioti-Julie | 22.3339 | 8.427398 |
| Pan_troglodytes_ellioti-Koto | 23.8682 | 5.709182 |
| Pan_troglodytes_ellioti-Paquita | 13.532 | 9.440522 |
| Pan_troglodytes_ellioti-Taweh | 20.6315 | 4.507583 |
| Pan_troglodytes_ellioti-Tobi | - | 9.009664 |
| Pan_troglodytes_ellioti-Kopongo | - | 7.946675 |
| Pan_troglodytes_schweinfurthii-100037_Vincent | 21.339 | 13.587553 |
| Pan_troglodytes_schweinfurthii-100040_Andromeda | 20.0961 | 15.853668 |
| Pan_troglodytes_schweinfurthii-A911_Kidongo | 47.1899 | 34.386432 |
| Pan_troglodytes_schweinfurthii-A912_Nakuu | 39.6525 | 26.502671 |
| Pan_troglodytes_schweinfurthii-Yolanda | 25.8635 | 28.46547 |
| Pan_troglodytes_schweinfurthii-9729_Harriet | 11.0701 | 8.636543 |
| Pan_troglodytes_troglodytes-A958_Doris | 35.7141 | 21.921671 |
| Pan_troglodytes_troglodytes-A960_Clara | 23.9787 | 16.498607 |
| Pan_troglodytes_verus-9730_Donald | 19.2662 | 9.404114 |
| Pan_troglodytes_verus-A907_Susie_A | 28.076 | 21.334752 |
| Pan_troglodytes_verus-9668_Bosco | 15.6902 | 7.808031 |
| Pan_troglodytes_verus-Clint | 33.7102 | 16.566894 |
| Pan_troglodytes_verus-X00100_Koby | 17.8774 | 10.910666 |
| Pongo_abelii-A947_Elsi | 31.4027 | 22.223994 |
| Pongo_abelii-A949_Dunja | 34.0396 | 23.289702 |
| Pongo_abelii-A953_Vicki | 29.8808 | 20.514495 |
| Pongo_pygmaeus-A939_Nonja | 25.6488 | 18.264823 |
| Pongo_pygmaeus-A942_Gusti | 29.6212 | 12.912687 |
| Pongo_pygmaeus-A943_Tilda | 30.2099 | 12.133029 |
| Pongo_pygmaeus-A944_Napoleon | 29.1711 | 7.543612 |
| Gorilla_gorilla_gorilla-KB3782_Vila | 10.8599 | 7.763543 |
| Gorilla_gorilla_gorilla-KB3784_Dolly | 14.7481 | 10.054133 |
| Gorilla_gorilla_gorilla-KB4986_Katie | 12.6238 | 8.955044 |
| Gorilla_gorilla_gorilla-KB5792_Carolyn | 10.4592 | 7.50207 |
| Gorilla_gorilla_gorilla-KB5852_Helen | 13.1221 | 9.352174 |
| Gorilla_gorilla_gorilla-KB6039_Oko | 13.8467 | 9.738127 |
| Gorilla_gorilla_gorilla-KB7973_Porta | 10.4381 | 7.553997 |
| Gorilla_gorilla_gorilla-Kwan | - | 8.935158 |
| Gorilla_beringei_graueri-Mukisi | - | 2.313648 |
| Gorilla_gorilla_gorilla-Kamilah | - | 22.561756 |
| Pongo_pygmaeus-KB5404_Billy | - | 12.425859 |
| Pongo_pygmaeus-KB4204_Dinah | - | 2.84881 |
| Pongo_abelii-KB4361_Dennis | - | 4.627225 |
| Pongo_abelii-KB4661_Dolly | - | 2.420915 |
| Pongo_pygmaeus-KB5405_Louis | - | 3.508526 |
| Pongo_pygmaeus-KB5406_Doris | - | 4.041577 |
| Pongo_pygmaeus-KB5543_Baldy | - | 3.784019 |
| Pongo_abelii-KB5883_Likoe | - | 2.955035 |
| Pongo_abelii-KB9258_Bubbles | - | 5.161534 |
| Pongo_abelii-SB550_Sibu | - | 3.676026 |

# Section 2: Nonhuman primate reference genome comparisons

**Mapping to nonhuman primate reference assemblies:** In order to assess human-specific deletions and the copy number of genomic sequence not represented in the human reference, we identified nonhuman primate-specific sequence. The gorGor3(McLean et al. 2011; Chimpanzee Sequencing and Analysis Consortium 2005; Scally et al. 2012), panTro3(Varki et al. 2008; Locke et al. 2011; Chimpanzee Sequencing and Analysis Consortium 2005) and ponAbe2(Elsea and Girirajan 2008; Kent 2002; Locke et al. 2011) references were each mapped in 1 kbp chunks with BLAT(Varki et al. 2008; Altschul et al. 1990; Olson 1999; Kent 2002) against the human reference genome (default parameters and *–minIdentity=90*) to identify regions ≥1 kbp that could not be aligned to the human reference (**Table 2.1**). Sex chromosomes were excluded and only regions with ≥500 bp of unmasked sequence were considered in the analysis.

**Table 2.1: The total sum of unmasked base pairs considered from each nonhuman primate assembly that did not place in the human reference genome.**

| Reference | Species | Unmasked base pairs | Homologous control sequence base pairs included in mapping |
| --- | --- | --- | --- |
| panTro3 | Chimpanzee | 6015364 | 2848731 |
| gorGor3 | Gorilla | 6124188 | 2827964 |
| ponAbe2 | Orangutan | 21110529 | 2797810 |

All genomes were mapped to this nonhuman primate-specific sequence in addition to four orthologous collections of ~2.85 Mbp of control diploid sequence present in all primate references in order to calibrate copy number counts. Copy number calling was performed on nonhuman primate sequence not present in the human reference, as explained above, adjusted to use the appropriate set of control sequence.

In total, 30,033 loci containing ≥500 bp of unmasked sequence were identified in the nonhuman primate genomes assayed; however, this set is redundant as sequence not present in the human reference genome may be present in multiple nonhuman primate reference genomes. We, thus, searched all sequences against each other using Mega BLAST(Cooper et al. 2011; Sudmant et al. 2010; Emerson et al. 2008; Altschul et al. 1990) (Mega BLAST version 2.2.11, parameters *-D 2 -p 95 -F m -U T -s 220 -R T*) and clustered together all sequences that could align over 20% of their length with ≥97% identity. A total of 22,114 clusters were then identified and from each cluster the sequence containing the maximum number of unmasked base pairs was selected for consideration. Finally, masked sequence in each of the regions considered was padded (extended out on both sides) by 36 bp to eliminate mapping edge effects(Witkin 1984; Sudmant et al. 2010) as was done in the full genome mappings described above. After repeat masking, 9855 regions with ≥500 bp remained. These loci, encompassing 25,374,943 total base pairs, were analyzed for their duplicated and deleted content (**Figure 2.1, see Section 6**).

**Figure 2.1: Size distribution of 9855 nonredundant loci not present in the human reference genome analyzed.**

# Section 3: Copy number variant calling methods

**Segmentation of duplication and deletion loci:** To detect duplications and deletions within genomes, we developed a new algorithm based on the concept of scale-space filtering(Ventura et al. 2011; Witkin 1984). Genome copy numbers were predicted in tiled contiguous windows at a resolution of 500 bp of unmasked sequence in each genome analyzed. We strived to segment these windowed estimates into diploid, duplicated, or deleted regions encompassing contiguous sets of windows. Additionally, we aimed to segment complex duplication architectures to inform the underlying SD structure (**Figure 3.1**).


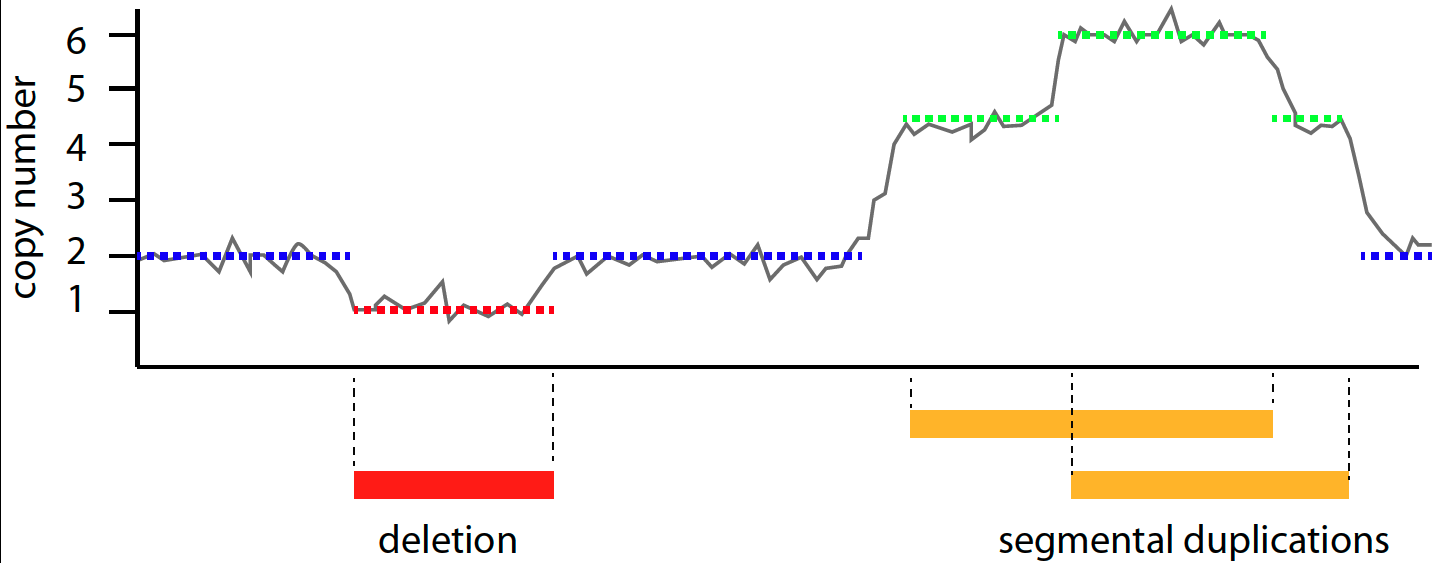


**Figure 3.1: A schematic of the desired segmentation output. The gray line represents the predicted copy number of contiguous tiled windows. An ideal segmentation should distinguish deletion (red), diploid (blue), and duplication (green) segments. Also, complex duplication segments should be sub-segmented into constitutive duplications of differing copy number.**

To construct this segmentation we first applied scale-space filtering over the windowed copy number estimations. Scale-space filtering is a multi-resolution technique that transforms a waveform signal *f(x)* into a set of waveforms *f(x,σ),* parameterized by the ‘*scale*’ variable *σ*. The transformation is achieved by applying a Gaussian convolution over the waveform for multiple values of *σ*, the standard deviation of the Gaussian. The zero crossings of the second derivative of the transformed waveform, corresponding to peaks of the first derivative of the convolution, are the loci of inflection of the original curve, smoothed over a particular scale. Zero contours of the second derivative within scale-space are assumed to correspond to the same underlying event and events are assumed to originate from the *x* locationwhere *σ🡪0*. Thus, for each scale-space *σi*, we traverse the scale-space zero contours from *σi* to *σmin* and construct a set of contour intercepts corresponding to inflections on our original signal. Finally, we select a scale-space cutoff, below which all contour intercepts are discarded, and use the remaining intercepts to construct an initial set of segments. Finally, we hierarchically cluster these segments assigning each segment a value equivalent to the median of the copy number of the windows it encompasses and greedily merging the pair of adjacent segments that shows the least difference in estimated copy number. This merging procedure is repeated until the minimum difference between adjacent segments reaches a designated threshold, in our case 0.5, corresponding to a copy number difference of 0.5 between adjacent segments.

**Identifying deletions - methods and sensitivity:**We constructed a set of deletions for each species by running our segmentation algorithm on each of the genomes analyzed individually, then merging the total set of events identified in all individuals into a species deletion set. In this way, the population of individuals is used to discover the total possible set of deletion events and these events can then be genotyped in all individuals. To test the accuracy of this method, we then compared the set of deletions called in gorillas to those recently identified in the Western lowland gorilla Kwan(Hormozdiari et al. 2009; Ventura et al. 2011) using an orthologous paired-end-read approach (Variation Hunter(Hormozdiari et al. 2009)) and validated by array comparative genomic hybridization (arrayCGH) **(Figure 3.2)**. Using segmentations based on 500 bp windows in the single individual Kwan, we were able to rediscover 97.6% (81/83) of deletions encompassing 3 kbp or more of unmasked sequence that were previously identified by paired-end analysis in this same individual and 89.6% of deletions encompassing 1 kbp or more of unmasked sequence (457/510). As smaller deletions were more challenging to discover, we leveraged the fact that 32 gorilla genomes were sequenced and compared the total set of gorilla deletions discovered by our algorithm to those identified by paired-end sequencing in Kwan. 95.3% (486/510) and 98.8% (159/161) of events encompassing greater than 1 kbp or greater than 2 kbp unmasked base pairs, respectively, were rediscovered in the total gorilla deletion set, demonstrating the power of leveraging a population of sequenced individuals.

**Figure 3.2: The concordance rate of deletion calls detected by the read-depth-based segmentation algorithm compared to those made by paired-end structural variation detection using Variation Hunter**(Bailey et al. 2002; Hormozdiari et al. 2009)**. Concordance rates are shown for different size thresholds using the number of unmasked base pairs (A) underlying an event (i.e., the number of base pairs used in the segmentation) and the total event size (B). Concordance rates are plotted for 500 bp segmentations and for events discovered in just Kwan and events discovered across the set of all gorillas (n=32).**

**Identifying duplication segmentations:**For each species we constructed a consensus set of duplication segments by merging the individual segmentations of all individuals in a species with the purpose of leveraging information across multiple individuals to inform the true SD boundaries. Segmentations across multiple individuals are largely similar. Additionally, as demonstrated from the detection of deletion loci across multiple individuals above, duplicated loci discovered in one individual can then be genotyped across the population of individuals. Merged duplication segmentations were constructed by first considering all duplicated regions (duplicated regions may or may not encompass multiple segments; **Figure 3.1**) detected across any individual. As demonstrated for the deletions above, we have significant power to detect events at a threshold of 3 kbp with 96.4% of deletions identified from discovery in a single individual. For each duplicated region, we assessed all individuals where the duplication was present and determined the median number of segments (*k)* identified in individuals in this duplicated region. Each edge between adjacent segments was also assigned a count equal to the total number of individuals in which this edge was identified. A consensus segmentation *k* segments long was then constructed by greedily selecting the *k+1* edges with the highest counts **(Figure 3.3)**.

**Figure 3.3: An example of a merged species segmentation overlaid over copy number heatmaps for 32 Western gorillas for a duplicated region on 17q21. The individual duplication segmentations (top, false colored) are merged (middle bars and black lines) to construct a more robust species segmentation from which copy numbers can be assessed and compared between individuals. Each window represents 500 bp of unmasked sequence scaled to genomic coordinates.**

To test the effectiveness of our method, we compared the consensus duplication segmentation made across the 10 humans we analyzed to annotated SDs in the reference genome(Bailey et al. 2002) called from genome self-alignments (whole-genome alignment comparison, WGAC) of a single individual. We identified 172,817,129 (**non-copy number corrected**) duplicated bp among the 10 humans analyzed (excluding sex chromosomes), 139,560,079 bp of which were present in at least 5/10 individuals, compared to 130,447,077 duplicated bp identified in the human reference genome by WGAC. 95.4% of all SDs containing >3 kbp of unmasked sequence in the human reference genome were identified in our analysis of these 10 human individuals and 92.7% of all annotated duplications were identified in at least 5/10 of these individuals (**Figure 3.4**).

**Figure 3.4: The overlap between duplicated base pairs identified from WGAC and identified by read-depth followed by segmentation in 10 diverse human individuals and present in at least 5/10 individuals containing at least 3 kbp of unmasked sequence.**

We next assessed our segmentation by comparing the boundaries of known SDs, identified from self-alignments of the human genome(Bailey et al. 2002), to those identified by our segmentation algorithm. We, thus, took all segments overlapping known SDs and compared the edges of each segmentation to the set of known human SD edge boundaries. Our duplication segmentation edges, which were based on copy number estimates across 500 unmasked bp tiled windows, had a median distance of 367 unmasked bp to the nearest known SD edge **(Figures 3.5 and 3.6)** and a median total distance of 1373 total base pairs to the nearest known SD boundary. Since the distance between known duplication edges and our segmentation edges is at the resolution of our windowed copy number estimates, we conclude that our segmentation is accurately reflecting the underlying duplication structure of the genomes analyzed.

**Figure 3.5: Histograms of the distance in total and unmasked base pairs from predicted duplication segmentation edges to known SD edges in the human genome. The median distance from a predicted duplication boundary to a known duplication boundary (dotted lines) is 367 bp of unmasked sequence or 1373 total bp. Human duplication segmentations were identified from duplications identified in 10 human genomes.**

**
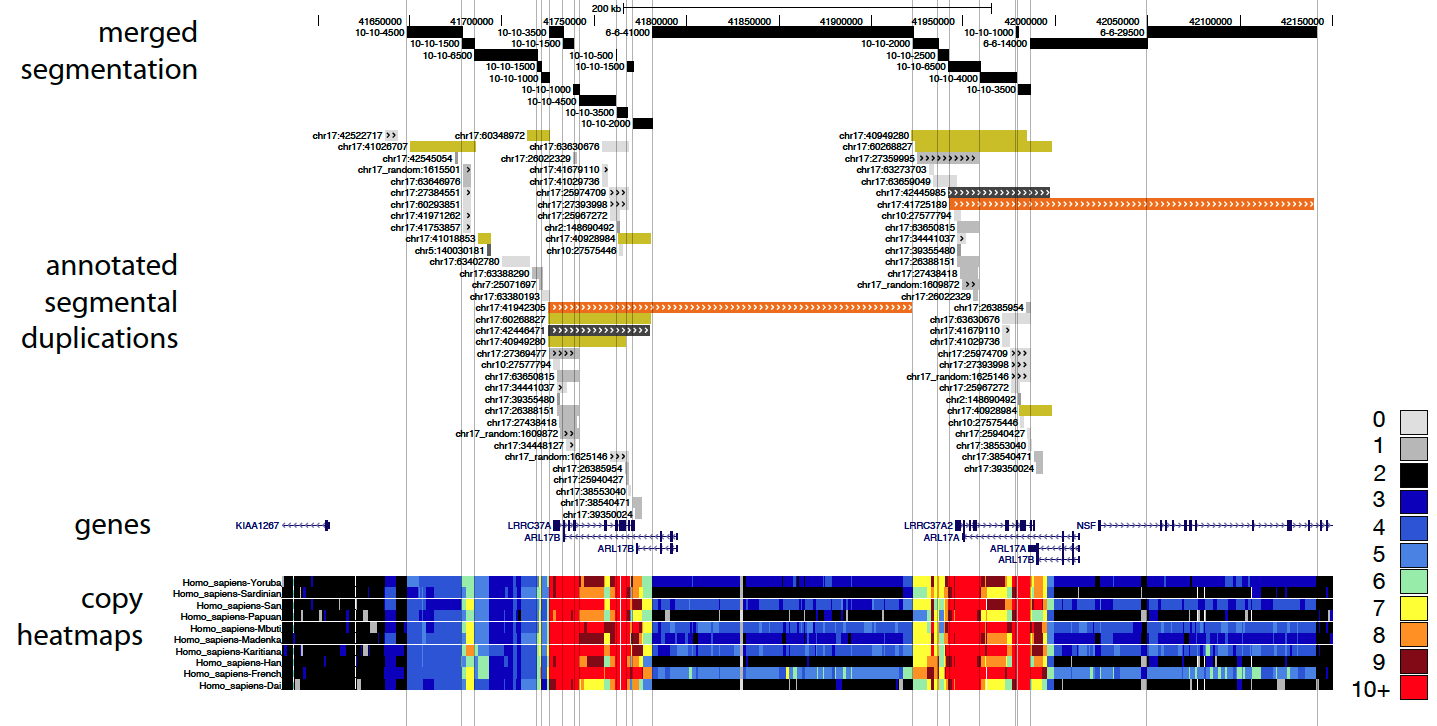
**

**Figure 3.6: An example of a complex duplicated locus on 17q21 in human. Human-annotated SDs are shown overlaid with predicted merged human species segmentations and copy number heatmaps of the 10 individuals analyzed. Boundaries of predicted human SD edges correspond well with annotated SD boundaries.**

# Section 4: Validations

**ArrayCGH validations:** We designed three custom arrays to validate our call-sets: a duplication array, a deletion array, and an array targeted to sequence present in nonhuman primate reference genomes but not in the human reference. A total of 58 total hybridization experiments (29 test/reference, reference/test dye-swap pairs) were performed on these platforms using the human HapMap individual NA12878 as a reference against 18 different nonhuman primate individuals (4 gorillas, 2 bonobos, 4 orangutans, and 8 chimpanzees). Primate and human DNA were labeled with Cy3 or Cy5 dye (NimbleGen labeling kit). Labeled DNA were mixed in equal amounts and hybridized to either a NimbleGen 3 X 720K or Agilent 2 X 400K array for 40 hours at 42 degrees. Slides were then washed, scanned, and analyzed. Individual noisy and poorly performing probes were identified as those giving opposite signals in dye swap experiments and were discarded. Additionally, only loci with three or more probes were considered. Lineage-specific deletions were considered confirmed if a mean log2ratio of ≤-0.5 across a locus was seen in all individuals in that lineage. Duplications were considered identically using a log2ratio cutoff of 0.25. Lineage-specific duplications along the human lineage were additionally considered confirmed if they intersected with known SDs identified by WGAC(Lichter et al. 1990; Bailey et al. 2002). The validation rate among all experiments ranged from 96.9% to 98.1% for fixed sites and was 85% for copy number polymorphisms (CNPs) demonstrating our call-set to be highly robust (**Table 4.1**).

**Table 4.1: Validation results summary. In total 9034 loci were experimentally tested, of which 8641 were validated, resulting in an overall validation rate of 95.65%.**

| Method | Targeted variation | Experiments performed | Loci experimentally tested | Loci confirmed | Validation rate |
| --- | --- | --- | --- | --- | --- |
| arrayCGH | **Duplications** | 14 | 3776 | 3660 | 96.93% |
| FISH | **Duplications** | 104 | 104 | 102 | 98.08% |
| arrayCGH | **Deletions** | 14 | 2503 | 2476 | 98.92% |
| arrayCGH | **Nonhuman reference sequence deletions (absent from human reference)** | 30 | 1518 | 1490 | 98.16% |
| arrayCGH | **CNPs** | 15 | 1520 | 1294 | 85.13% |
|  | **Total** | **177** | **9421** | **9022** | 95.76% |

**Fluorescent *in situ* hybridization (FISH) validations:** To further assess the structure of duplications and deletions identified, we performed 109 FISH experiments on human and nonhuman great ape cell lines across 53 different loci. Metaphase and interphase nuclei from nonhuman primates (common chimpanzee, gorilla, bonobo, and orangutan) were obtained from lymphoblastoid or fibroblast cell lines; human metaphase spreads were derived from PHA-stimulated peripheral lymphocytes of normal donors by standard procedures. Briefly, cells were treated with colcemid (D1925; Sigma) and collected by centrifugation, incubated in a hypotonic solution (KCl 0.56%), and then washed three times and stored in a fixative solution (one part acetic acid, three parts methanol). DNA from human fosmid clones was extracted using a Plasmid Miniprep kit (Bio-Rad, Cat# 732-6100). FISH assays were performed as previously described by Lichter et al(Cheng et al. 2005; Lichter et al. 1990). Fosmids were directly labeled either with Cy3-dUTP or fluorescein-dCTP by nick-translation reactions. Three hundred nanograms of labeled probe were used for the FISH experiments. Hybridization was performed at 37°C in 2XSSC, 50% (v/v) formamide, 10% (w/v) dextran sulfate, and 3 μg of sonicated salmon sperm DNA in a volume of 10 μL. High stringency post-hybridization washings (three) were at 60°C in 0.1X SSC. Digital images were obtained using a Leica DMRXA epifluorescence microscope equipped with a CCD camera. Fluorescence signals detected with Cy3 and fluorescein filters and chromosomes and nuclei images detected with DAPI filter were recorded separately as gray-scale images. Pseudocoloring and merging of images were performed using Adobe Photoshop software.

Of the 109 *in situ* experiments performed, we confirmed in 102 cases the predicted duplication and were able to resolve the duplication locus (**Table 4.2**). Five experiments were inconclusive showing only background signal resulting in an overall validation rate of 98% (102/104). Each of the two remaining duplications not resolved by FISH showed strong signals by arrayCGH, suggesting a FISH false-negative (**Table 4.2**). Overall, the FISH and arrayCGH validation rates results are highly concordant, resulting in an overall validation rate of ~97% (**Table 4.1**).

**<TABLE 4.2>**

# Section 5: Lineage-specific great ape segmental duplications and deletions

**Lineage-specific SDs:** Lineage-specific duplication loci were assigned by assessing all duplicated segments and labeling them as lineage-specific SDs if >50% of individuals in a particular lineage were at least copy number 4 while <10% of individuals in all other lineages showed any signature of duplication (<10% ≥copy 3). All segments were assigned a duplication state. The same approach was taken to identify expansions, requiring all individuals in a particular lineage to have a higher copy number than all other individuals. The total number of duplicated base pairs in a specific lineage was thus calculated by summing the duplication content of all duplicated segments corrected for the copy number of SDs present in the human genome (this process has previously been termed *copy number correction*(Cheng et al. 2005; Marques-Bonet et al. 2009; Ventura et al. 2011)) and excluding the ancestral locus of the duplication (**Table 5.1**). We note that in previous analyses of lineage-specific SDs we have not excluded the ancestral locus from total counts(Meyer et al. 2012; Cheng et al. 2005; Marques-Bonet et al. 2009; Ventura et al. 2011). However, to directly compare different rates in the accumulation of genetic variation, excluding the ancestral locus is necessary. Duplicated base pair counts were also computed over the nonhuman primate reference assembly sequence that was not present in the human reference genome. The overall contribution of this sequence to the total number of duplicated base pairs was minimal however (~2%).

**Table 5.1: Counts of the number of events and total base pairs specifically duplicated in different lineages. Base-pair counts are corrected for the SD content of the human reference genome and to exclude the ancestral duplication locus.**

| lineage | copy corrected duplicated base pairs | number of sites |
| --- | --- | --- |
| Gbeg-Ggod-Ggog-Hde-Hsa-Pab-Ppa-Ppy-Ptre-Ptrs-Ptrt-Ptrv | 184296495 | 7118 |
| Gbeg-Ggod-Ggog | 29413779 | 278 |
| Pab-Ppy | 27854532 | 885 |
| Gbeg-Ggod-Ggog-Hde-Hsa-Ppa-Ptre-Ptrs-Ptrt-Ptrv | 24491334 | 1172 |
| Ppa-Ptre-Ptrs-Ptrt-Ptrv | 6050953 | 121 |
| Hde-Hsa | 5715010 | 282 |
| Hde-Hsa-Ppa-Ptre-Ptrs-Ptrt-Ptrv | 4227312 | 269 |
| Ppa | 860900 | 67 |
| Ptre-Ptrs-Ptrt-Ptrv | 802219 | 30 |
| Ppy | 487342 | 48 |
| Gbeg | 446285 | 89 |
| Pab | 361732 | 38 |
| Ggod-Ggog | 339371 | 35 |
| Hsa | 280445 | 19 |
| Hde | 142093 | 6 |
| Ggod | 111722 | 31 |
| Ptrv | 31250 | 15 |
| Ptrt | 20823 | 10 |
| Ptrs | 13994 | 2 |
| Ptre-Ptrv | 13830 | 2 |
| Ptrs-Ptrt | 1790 | 1 |
| Ptre | 1302 | 1 |
| Ggog | 5600 | 2 |
| BONOBO-CHIMP-EASTERNGORILLA-WESTERNGORILLA | 25555717 | 103 |
| EASTERNGORILLA-HUMAN-WESTERNGORILLA | 2646209 | 204 |
| EASTERNGORILLA-ORANGUTAN-WESTERNGORILLA | 2002046 | 78 |
| EASTERNGORILLA-HUMAN-ORANGUTAN-WESTERNGORILLA | 1776400 | 211 |
| BONOBO-CHIMP-HUMAN-ORANGUTAN | 1492574 | 146 |
| HUMAN-ORANGUTAN | 1015592 | 86 |
| CHIMP-EASTERNGORILLA-HUMAN-WESTERNGORILLA | 991242 | 64 |
| CHIMP-EASTERNGORILLA-HUMAN-ORANGUTAN-WESTERNGORILLA | 705223 | 55 |
| BONOBO-CHIMP-EASTERNGORILLA-ORANGUTAN-WESTERNGORILLA | 642072 | 27 |
| BONOBO-CHIMP-ORANGUTAN | 435420 | 17 |
| Gbeg-Ggod-Ggog-Ppa-Ptre-Ptrs-Ptrt-Ptrv | 426930 | 6 |
| Hde-Hsa-Pab-Ppy | 420272 | 9 |
| HUMAN-WESTERNGORILLA | 243475 | 65 |
| Gbeg-Ggod-Ggog-Pab-Ppy | 172364 | 17 |
| BONOBO-EASTERNGORILLA-HUMAN-WESTERNGORILLA | 148340 | 16 |
| CHIMP-HUMAN | 140254 | 30 |
| BONOBO-EASTERNGORILLA-ORANGUTAN-WESTERNGORILLA | 122483 | 8 |
| HUMAN-ORANGUTAN-WESTERNGORILLA | 118243 | 53 |
| ORANGUTAN-WESTERNGORILLA | 111772 | 19 |
| CHIMP-EASTERNGORILLA-WESTERNGORILLA | 97792 | 3 |
| BONOBO-CHIMP-WESTERNGORILLA | 93547 | 23 |
| BONOBO-HUMAN | 46010 | 12 |
| CHIMP-EASTERNGORILLA | 34776 | 1 |
| CHIMP-HUMAN-ORANGUTAN | 27975 | 10 |
| BONOBO-ORANGUTAN | 23010 | 5 |
| BONOBO-EASTERNGORILLA-WESTERNGORILLA | 18598 | 1 |
| Pab-Ppa-Ppy-Ptre-Ptrs-Ptrt-Ptrv | 13736 | 5 |
| BONOBO-ORANGUTAN-WESTERNGORILLA | 13600 | 2 |
| BONOBO-EASTERNGORILLA-HUMAN-ORANGUTAN-WESTERNGORILLA | 10933 | 7 |
| CHIMP-HUMAN-WESTERNGORILLA | 8363 | 4 |
| CHIMP-EASTERNGORILLA-ORANGUTAN-WESTERNGORILLA | 7058 | 2 |
| EASTERNGORILLA-ORANGUTAN | 6920 | 2 |
| BONOBO-CHIMP-ORANGUTAN-WESTERNGORILLA | 5015 | 2 |
| BONOBO-CHIMP-EASTERNGORILLA | 4623 | 2 |
| Gbeg-Ggod-Ggog-Hde-Hsa | 4616 | 2 |
| CHIMP-ORANGUTAN | 2466 | 1 |
| BONOBO-CHIMP-HUMAN-ORANGUTAN-WESTERNGORILLA | 2054 | 3 |
| BONOBO-CHIMP-EASTERNGORILLA-HUMAN-ORANGUTAN | 1924 | 3 |
| BONOBO-HUMAN-ORANGUTAN | 1778 | 1 |
| BONOBO-CHIMP-HUMAN-WESTERNGORILLA | 1303 | 2 |
| EASTERNGORILLA-HUMAN-ORANGUTAN | 931 | 5 |
| BONOBO-HUMAN-WESTERNGORILLA | 519 | 1 |
| BONOBO-HUMAN-ORANGUTAN-WESTERNGORILLA | 507 | 2 |
| EASTERNGORILLA-HUMAN | 301 | 1 |
| BONOBO-CHIMP-EASTERNGORILLA-HUMAN | 145 | 1 |

**Resolving duplications inconsistent with the phylogeny:** Some of the duplication events identified were inconsistent with the species’ phylogeny and, thus, could not simply be assigned to any branch. For example, ~25.6 Mbp of sequence were identified as duplicated in chimpanzees, bonobos, and gorillas, but not in the human lineage. The most parsimonious explanation for this result in many cases is that this duplicated sequence was present in the ancestor of African great apes and was deleted in the human lineage. This sequence was subsequently added to correct lineage using the most parsimonious explanation.

**Duplication rates:** The rate of duplication was directly compared to the rate of single nucleotide substitution from single nucleotide polymorphism (SNP) data calculated for86 of the same individuals assessed for duplication content (see companion Prado/Sudmant 2012; **Table 5.2**). Briefly, all individuals were aligned to the HG18 reference genome using BWA with relaxed edit distance parameters to account for the increased divergence of these species. SNPs were called using the GATK pipeline on a population level and were filtered for depth-of-coverage, proximity to an indel, and allele balance. Genetic distances between all species were then calculated by computing the genetic distances between all individuals and taking the mean pairwise divergence between individuals of different populations. A tree was constructed from this distance matrix by neighbor joining. The Denisova individual was placed as a sister group to the human genome splitting at 12.35% the branch length of the human-chimpanzee common ancestor with a branch length 1.2% shorter than human as reported in Meyer *et al* 2012(Sun et al. 2012; Meyer et al. 2012; Langergraber et al. 2012). Divergence times were calculated using a mutation rate scaled to a human-chimpanzee divergence time of 6.5 million years ago, (8.79e-10 substitutions/year per base **Table 5.2**). These speciation times match well with the literature(Sun et al. 2012; Langergraber et al. 2012). The rate of duplication along each branch was calculated by dividing the per-base-pair duplication rate (total copy number corrected duplicated bp/2.867e9) by the per-base-pair substitution rate and additionally by the estimated divergence times in millions of years (**Table 5.3**).

As we previously reported(1000 Genomes Project Consortium et al. 2012; Hach et al. 2010; Marques-Bonet et al. 2009; Ventura et al. 2011), we find a burst of duplication activity in the ancestor of African great apes (**Figure 5.1**) corresponding to a duplication rate along the African great ape lineage approximately 2.6-fold the rate of substitution and ~7-fold higher than the rate along the branch leading to the human lineage. This increased rate of duplication continued along the gorilla lineage and the chimpanzee-human ancestral lineage.

**<Table 5.3>**

**Table 5.2: Divergence estimates from Prado and Sudmant *et al* (under review). Divergence times in years are estimated using a mutation rate of 8.79X10-10 bp/year, calibrated to a 6.5 million human-chimpanzee divergence time*.***

| lineage | branch distance to leaf | branch length | time to leaf (MYA) | branch length (million years) |
| --- | --- | --- | --- | --- |
| Gbeg-Ggod-Ggog-Hde-Hsa-Pab-Ppa-Ppy-Ptre-Ptrs-Ptrt-Ptrv | 0.014354 | - | 16.3 | - |
| Gbeg-Ggod-Ggog-Hde-Hsa-Ppa-Ptre-Ptrs-Ptrt-Ptrv | 0.006928 | 0.007422 | 7.9 | 8.4 |
| Hde-Hsa-Ppa-Ptre-Ptrs-Ptrt-Ptrv | 0.005713 | 0.00126 | 6.5 | 1.4 |
| Ppa-Ptre-Ptrs-Ptrt-Ptrv | 0.001752 | 0.00391 | 2 | 4.4 |
| Pab-Ppy | 0.001585 | 0.012788 | 1.8 | 14.5 |
| Gbeg-Ggod-Ggog | 0.000997 | 0.00584 | 1.1 | 6.6 |
| Ptre-Ptrs-Ptrt-Ptrv | 0.000937 | 0.00081 | 1.1 | 0.9 |
| Ptrs-Ptrt | 0.00085 | 0.00006 | 1 | 0.1 |
| Ggod-Ggog | 0.00081 | 0.00017 | 0.9 | 0.2 |
| Ptre-Ptrv | 0.000835 | 0.00013 | 0.9 | 0.1 |
| Hde-Hsa | 0.000737 | 0.005233 | 0.8 | 6 |
| Ppy | 0 | 0.00162 | 0 | 1.8 |
| Pab | 0 | 0.00155 | 0 | 1.8 |
| Gbeg | 0 | 0.00103 | 0 | 1.2 |
| Hde | 0 | 0.000666 | 0 | 0.8 |
| Hsa | 0 | 0.000737 | 0 | 0.8 |
| Ppa | 0 | 0.00177 | 0 | 2 |
| Ggod | 0 | 0.00079 | 0 | 0.9 |
| Ggog | 0 | 0.00083 | 0 | 0.9 |
| Ptrv | 0 | 0.00086 | 0 | 1 |
| Ptre | 0 | 0.00081 | 0 | 0.9 |
| Ptrs | 0 | 0.00087 | 0 | 1 |
| Ptrt | 0 | 0.00083 | 0 | 0.9 |

**Figure 5.1: A species/subspecies tree with branch lengths proportional to the number of substitutions and branch widths scaled to the base-pair duplication rate per-nucleotide substitution and labeled for nonterminal branches. A burst of duplications in the ancestor of African great apes is apparent with duplication rates along the African great ape lineage of ~7-fold the rate along the human lineage per million years.**

**Lineage-specific deletions:** Lineage-specific deletions were assigned as above for duplications, including sequence not present in the human reference genome (see **Section 2**). We required at least 80% of individuals to have a complete deletion signature in a particular lineage and all other lineages to show evidence of at least a single copy of the segment in 100% of all individuals assayed to ensure we were capturing fixed lineage-specific deletion events (**Figure 5.2**, **Table 5.4**). In contrast to the rate of duplication, we find the rate of deletion is largely clocklike with the major exception of the chimpanzee ancestral branch (**Table 5.3,** **Figure 5.3**), on which we observe a ~2-fold acceleration in the rate of chimpanzee deletions. This excess in deletion events correlates with a predicted severe reduction in effective population size, possibly the result of an extreme bottleneck in the chimpanzee-bonobo ancestor (**Figure 5.4,** Prado/Sudmant under review).

**Figure 5.2: Size distribution (in log space) of lineage-specific duplications and deletions identified in great apes.**

**Table 5.4: Counts of all lineage-specific deletions identified in great apes and the number of sites identified.**

| species | total_bp | total_events | total_bp_gt_5kb | total_events_gt_5kb |
| --- | --- | --- | --- | --- |
| Ptrs | 7887 | 2 | 0 | 0 |
| Ptrt | 10655 | 4 | 0 | 0 |
| Ptrv | 276145 | 32 | 228196 | 17 |
| Ggod-Ggog | 174258 | 8 | 171072 | 7 |
| Ppy | 411190 | 36 | 352421 | 19 |
| Ppa-Ptre-Ptrs-Ptrt-Ptrv | 6495864 | 575 | 5727585 | 339 |
| Ptre | 35715 | 7 | 21178 | 2 |
| Hde-Hsa | 32339 | 2 | 32339 | 2 |
| Hde | 931589 | 113 | 755770 | 58 |
| Ppa-Ptre-Ptrs-Ptrt-Ptrv-Pab-Ppy | 373174 | 13 | 354786 | 8 |
| Gbeg-Ggod-Ggog-Pab-Ppy | 356638 | 31 | 330272 | 23 |
| Ptrs-Ptrt | 8730 | 1 | 8730 | 1 |
| Gbeg-Ggod-Ggog-Ppa-Ptre-Ptrs-Ptrt-Ptrv | 1072867 | 76 | 1008570 | 57 |
| Ppa | 1644331 | 149 | 1456279 | 86 |
| Ptre-Ptrv | 21208 | 4 | 12213 | 1 |
| Pab-Ppy | 10562674 | 1067 | 8739431 | 518 |
| Gbeg-Ggod-Ggog-Hde-Hsa-Ppa-Ptre-Ptrs-Ptrt-Ptrv-Pab-Ppy | 165022599 | 264 | 164936373 | 237 |
| Gbeg-Ggod-Ggog | 6271686 | 663 | 5236407 | 353 |
| Gbeg | 527951 | 70 | 422322 | 37 |
| Ptre-Ptrs-Ptrt-Ptrv | 441826 | 62 | 326028 | 29 |
| Ggod | 1194717 | 146 | 956540 | 74 |
| Hsa | 20353 | 2 | 17909 | 1 |
| Pab | 210551 | 10 | 198160 | 6 |

**Figure 5.3: A species/subspecies tree with branch lengths proportional to the number of substitutions and branch widths scaled to the base-pair deletion rate per nucleotide substitution and labeled for nonterminal branches. The rate of deletion is largely clocklike with respect to the substitution rate; however, we find a ~2-fold increase in the rate of deletion in the chimpanzee ancestor.**

**
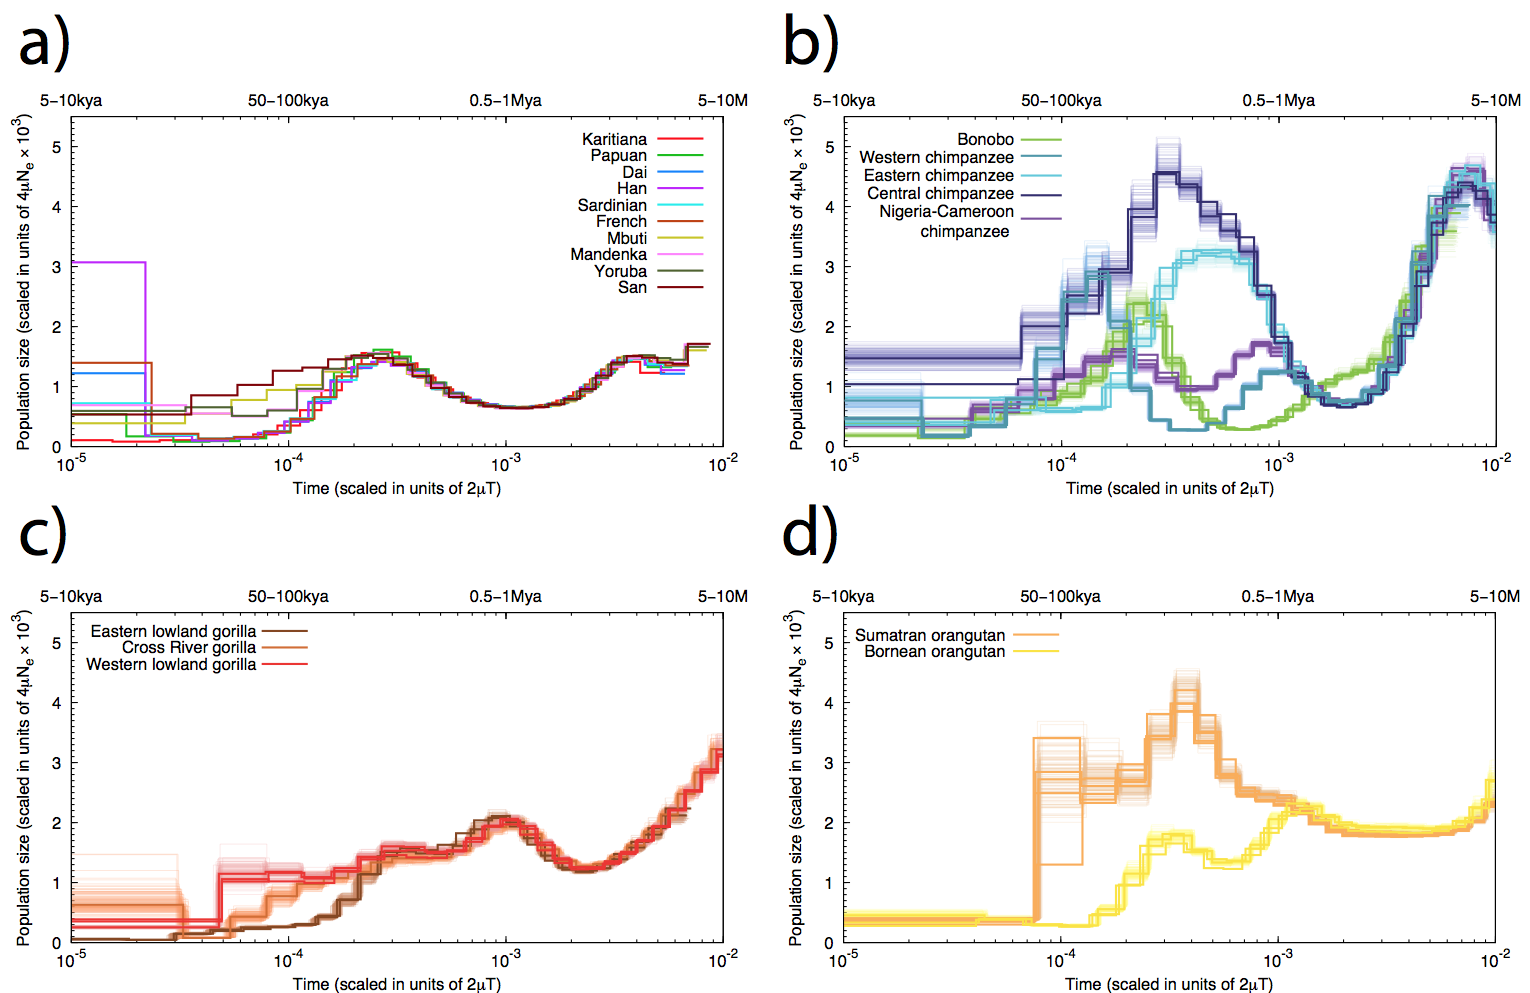
**

**Figure 5.4: Pairwise Sequentially Markovian Coalescent (PSMC) profiles of effective population size (by scaled mutation rate) as a function of time (measured by pairwise sequence divergence, lower x-axis, and in years assuming a mutation rate ranging 10-9 – 5x10-10, upper x-axis) from Prado and Sudmant (under review). In panels b,c,d thin lines indicate 100 bootstrapped replicates to indicate confidence. A severe crash in the effective population size of the chimpanzee-bonobo ancestor is observed just prior to the separation of the chimpanzee and bonobo species. Steep declines are also observed in Sumatran orangutans, bonobos, and Western chimpanzees.**

In concert, these analyses demonstrate how two diametric forms of structural variation have differently shaped the genomes of great apes (**Figure 5.5**). While a burst of duplications characterized the African great ape ancestral genome, this rate subsequently rapidly decreased in the chimpanzee-human ancestral lineage and decreased, at a slower rate, in the gorilla lineage. The rate of deletion, in contrast, has remained largely consistent with the exception of an increase in the chimpanzee ancestor. This striking excess of deletions coincides with a drop in the predicted effective population size, suggesting a severe bottleneck may have resulted in the collapse of this population and, thus, a surfeit of deletions accumulating. While the overall number of base pairs affected by duplication far exceeds that affected by deletion, the relative contribution of duplicated base pairs to deleted base pairs is markedly diverse among different lineages. Duplicated base pairs outnumber deleted base pairs by a factor 6.3 in the African great ape ancestor. In the human ancestor and the chimpanzee ancestor, these ratios are 1.3 and 0.76, respectively, exhibiting a markedly higher relative impact of deletions in these lineages.

**Figure 5.5: The superimposed duplication and deletion rate trees with all nonterminal branches labeled with the duplication and deletion rates per substitution. In the *Pan* lineage the rate of deletion has dramatically increased with respect to the rate of duplication.**

# Section 6: Lineage-specific deletions and diversity of sequence not represented in the human reference genome

**Evolution and diversity of human reference deletions:** Of the 9855 loci present in nonhuman primate reference genomes but not represented in the human reference genome, 5777 loci (13.54 Mbp) corresponded to lineage-specific fixed deletions and were assigned to their respective branches (see **Section 5**, **Table 6.1**, **Figure 6.1**). In addition to these loci identified as fixed deletions, 52 loci encompassing 179 kbp of sequence were not present in any of the individuals assessed, suggesting that these loci largely represent mis-assemblies in addition to rapidly diverging sequence and copy number polymorphic loci.

**Table 6.1: Summary of sequence absent from the human reference genome.**

***Sequence identified to be segregating at >5% frequency in 620 diverse humans.**

| Lineage | Fixed deletions bp (loci) | Duplicated copy corrected bp (loci) | Copy number polymorphic bp (loci) |
| --- | --- | --- | --- |
| Human | 3588396 (917) | 168165 (2) | 695007 (324)***** |
| Human-Pan | 1232172 (213) | 2529 (1) | - |
| Human-Pan-Gorilla | 8729420 (1185) | 11850 (3) | - |
| Human-Pan-Gorilla-Orangutan | 179252 (52) | 307249 (46) | - |

**Figure 6.1: A heatmap of sequence absent from the reference genome. Each column represents a locus; blocks are colored to represent per-population frequency estimates of the presence or absence of each particular sequence. The cladogram to the left represents hierarchical clustering of the populations surveyed and recapitulates all population relationships.**

We next strived to identify which of these loci not present in the human reference genome could be found segregating in the human population. Accordingly, we mapped short-read shotgun sequence from 620 diverse humans from 13 different populations sequenced as part of the 1000 Genomes Project(Siepel et al. 2005; 1000 Genomes Project Consortium et al. 2012) to loci not present in the human reference genome and determined the approximate frequency of each of these regions in individual populations based on the *presence/absence* of signal. In total, we identified 316 loci corresponding 683 kbp of sequence segregating in at >5% frequency in at least one population (**Table 6.1**). We note that these are not strictly allele frequencies but frequencies of the presence/absence of any particular sequence, as accurate copy number genotyping of these sequences is problematic due to their divergence, small size, and the low coverage of these samples. Hierarchical clustering of the 13 populations based on these frequency estimates completely recapitulates all of the inter-population relationships (**Figure 6.2**), including those between admixed populations, and places the African populations as an outgroup to the European, Asian and North American populations as is expected for an out-of-Africa origin of Homo sapiens.

**Figure 6.2: A heatmap of sequences genotyped for presence/absence in 620 diverse humans from the 1000 Genomes Project. Columns consist of 324 loci with a frequency >5% in at least one of the populations assessed. Blocks are colored by the per-population frequency and both rows and columns are clustered by hierarchical clustering recapitulating the inter-population relationships.**

We calculated a modified Fst (indicated here as Fst*****) statistic for each of these loci using the frequency of the presence of a sequence as a surrogate for allele frequency (**Figure 6.3**). Ranking events by these Fst***** values, we identified a number of sites of extreme population differentiation, including 53.8 kbp of continental-population-specific sequence absent from all other continental populations groups (52.5 kbp African- and 1.4 kbp European-specific sequence segregating at least 1% frequency) in addition to 77.4 kbp of sequence segregating exclusively in a single continental population and 152.9 kbp of sequence segregating in a single subpopulation at a frequency of at least 1% while fixed in all other populations.

**Table 6.1: Population-specific segregating copy number variant loci not found in the human reference genome. (CNVs=copy number variations)**

| Population | YRI | CHB | ASW | TSI | MXL | LWK | CEU | CHS | GBR | PUR | FIN | JPT | CLM |
| --- | --- | --- | --- | --- | --- | --- | --- | --- | --- | --- | --- | --- | --- |
| # of CNVs | 5 | 2 | 1 | 4 | 3 | 2 | 2 | 2 | 14 | 11 | 8 | 1 | 5 |
| Total bp sum | 44978 | 4900 | 871 | 4319 | 4895 | 2002 | 5494 | 10092 | 31903 | 18243 | 16614 | 2744 | 5798 |

**Functional impact of deleted sequence absent from the human reference:** Compared to the human reference genome, sequences absent from the human reference yet present in other nonhuman primate reference genomes are less likely to be annotated for functional elements. We, thus, performed a number of analyses to assess the functional relevance of sequence deleted throughout the great ape lineage and absent in the human reference. We first assessed the conservation of these elements using Phastcons highly conserved elements (HCEs(Siepel et al. 2005), UCSC genome browser). Among the 13.54 Mbp of human-deleted sequence, we identify 180,522 bp of conserved sequence (2219 total elements) with 9910/2385 human deleted loci (38.1%) encompassing an element. As HCEs encompass 3-8% of the human reference genome(Brawand et al. 2011; Siepel et al. 2005), this represents a depletion of conserved loci in human-deleted loci. We next assessed RefSeq gene and mRNA annotations to identify deleted coding elements. We found three complete or partially deleted genes (**Table 6.2**).

**Table 6.2: Annotated genic elements absent from the reference genome and deleted in 620 diverse humans.**

| Locus | Gene (approved name) | Lineage lost | Description |
| --- | --- | --- | --- |
| chr19:56319337-56321545 | *SIGLEC13* | Human | Complete gene deletion – previously identified in Want *et al,* 2012. This gene is expressed in chimpanzee monocytes which are responsible for innate immunity to bacteria. |
| chr19:7839944-7842326 | *CD209L2 (CLECM4)* | Human | 3 exon deletion of the gene encoding CD209 antigen like protein E. CD209 genes encode for C-type lectins which recognize bacteria, mycobacteria, mycobacteria and, viruses and protozoa. CD209L2 has been previously identified as a human-specific deletion. Oritz *et al,* 2008. |
| chr1_random:2270147-2276474 | *LOC100171780* | Gorilla-Chimp-Human | Uncharacterized protein |

As nonhuman primate gene annotations are potentially incomplete, we next assessed RNAseq data from six tissues each in gorillas, humans, chimps, bonobos, and orangutans (55 experiments assessed total) generated in Brawand *et al*(Brawand et al. 2011) (**Table 6.3)**.

**Table 6.3: Summary table of 55 RNAseq experiments from Brawand *et al*** (Langmead and Salzberg 2012; Brawand et al. 2011; Trapnell et al. 2012) **across all great ape lineages mapped with Bowtie 2.0 to each respective primate reference genome. cb=cerebellum, ts=testis, kd=kidney, ht=heart, br=brain, lv=liver**

| ID | Species | Tissue | Sex | Reads Placed (Primate Reference) |
| --- | --- | --- | --- | --- |
| GSM752656 | ggo | cb | M | 11108268 |
| GSM752663 | ggo | ts | M | 12161822 |
| GSM752659 | ggo | kd | F | 12879458 |
| GSM752658 | ggo | ht | M | 15376965 |
| GSM752655 | ggo | cb | F | 15966074 |
| GSM752657 | ggo | ht | F | 16347127 |
| GSM752660 | ggo | kd | M | 19509289 |
| GSM752653 | ggo | br | F | 20146569 |
| GSM752661 | ggo | lv | F | 22299848 |
| GSM752662 | ggo | lv | M | 25664046 |
| GSM752696 | hsa | br | M | 2145713 |
| GSM752707 | hsa | ts | M | 3933518 |
| GSM752692 | hsa | br | M | 9305888 |
| GSM752703 | hsa | kd | M | 12157025 |
| GSM752701 | hsa | ht | M | 12557133 |
| GSM752694 | hsa | br | M | 13052578 |
| GSM752699 | hsa | ht | F | 13115883 |
| GSM752700 | hsa | ht | M | 14363375 |
| GSM752702 | hsa | kd | F | 14780007 |
| GSM752704 | hsa | kd | M | 15587456 |
| GSM752691 | hsa | br | F | 15713369 |
| GSM752706 | hsa | lv | M | 15724554 |
| GSM752697 | hsa | cb | F | 18974942 |
| GSM752708 | hsa | ts | M | 20019814 |
| GSM752698 | hsa | cb | M | 23395954 |
| GSM752705 | hsa | lv | M | 24466576 |
| GSM752690 | ppa | ts | M | 7470392 |
| GSM752689 | ppa | lv | M | 10507559 |
| GSM752685 | ppa | ht | M | 13320503 |
| GSM752680 | ppa | br | F | 14135815 |
| GSM752684 | ppa | ht | F | 14282705 |
| GSM752687 | ppa | kd | M | 15046031 |
| GSM752686 | ppa | kd | F | 16010719 |
| GSM752682 | ppa | cb | F | 16159020 |
| GSM752683 | ppa | cb | M | 16411415 |
| GSM752688 | ppa | lv | F | 18219997 |
| GSM752681 | ppa | br | M | 22253609 |
| GSM752646 | ppy | cb | F | 11143394 |
| GSM752648 | ppy | ht | M | 13409196 |
| GSM752649 | ppy | kd | F | 14743211 |
| GSM752651 | ppy | lv | F | 15581764 |
| GSM752650 | ppy | kd | M | 16265868 |
| GSM752644 | ppy | br | F | 18775829 |
| GSM752647 | ppy | ht | F | 19782162 |
| GSM752652 | ppy | lv | M | 22657746 |
| GSM752677 | ptr | lv | M | 8012561 |
| GSM752664 | ptr | br | F | 8738268 |
| GSM752671 | ptr | cb | M | 9975348 |
| GSM752678 | ptr | ts | M | 11938608 |
| GSM752674 | ptr | kd | F | 17641193 |
| GSM752670 | ptr | cb | F | 17948479 |
| GSM752672 | ptr | ht | F | 18475125 |
| GSM752676 | ptr | lv | F | 19954292 |
| GSM752673 | ptr | ht | M | 20050737 |
| GSM752675 | ptr | kd | M | 24779565 |

Reads were mapped to each of their respective species’ reference genomes separately with the Bowtie 2 aligner using TopHat(Trapnell et al. 2012; Langmead and Salzberg 2012). Transcripts were then assembled using the Cufflinks package(Trapnell et al. 2012) (**Table 6.4**). Both TopHat and Cufflinks were run with default parameters, thus, only transcripts supported by at least 10 RNAseq fragments were reported. Additionally we required transcripts to show intron-exon structure to minimize false positives. Among the identified transcripts, we rediscovered 2/3 annotated loci described above. No evidence of the CD209L2 annotated transcript was found. In macaque CD209L2 is expressed in the liver, spleen, lymph nodes, heart, and skin; however, its paralogs are specifically expressed in dendritic cells and lymph nodes, suggesting that the transcript may simply be absent from the tissues assessed here. We identified 115 deletions along the human lineage encompassing expressed transcripts. Of the 115 regions containing expressed transcripts, 57 (49.6%) additionally contained conserved elements, representing a ~6-fold enrichment for conserved elements in regions containing an expressed transcript compared to genomic background.

**Table 6.4: Fixed deletions absent from the human reference genome containing *de novo* assembled transcripts.**

| Species Reference | Regions containing expressed transcripts (previously annotated transcripts identified) | Regions containing an expressed transcript and conserved elements |
| --- | --- | --- |
| ponAbe2 | 83 (2) | 38 |
| gorGor3 | 1 | 0 |
| panTro3 | 57 (1) | 19 |

**Great ape gene deletions:** We assessed lineage-specific gene deletions throughout the great ape lineage for underlying gene content. For deletions identified from mappings to the human reference genome, RefSeq gene models were used. As nonhuman primate reference genomes are not as well annotated, for assessing the genic content of deletions identified among these references, we use *de novo* assembled transcripts that contain an open reading frame (ORF). ORFs were identified within assembled transcripts using the TransDecoder package (<http://transdecoder.sourceforge.net/>). In total, we identified 340 genes in which at least one exon was specifically deleted in the great ape lineage (**Table 6.5**). 29 gene deletions were present in multiple lineages and inconsistent with the overall species tree hence representing cases of either homoplasy or incomplete lineage sorting.

**Table 6.5: Lineage-specific genic deletion counts in the great ape lineage. Gene counts represent the total number of fixed lineage-specific genes containing at least a single exon deletion. Rates are calculated per million years (MY) along each branch. A surfeit of gene deletions is observed along the chimpanzee-bonobo lineage.**

| lineage | genes | exons | genes >50% deleted | gene deletions/MY |
| --- | --- | --- | --- | --- |
| Gbeg | 1 | 1 | 0 | 0.833333 |
| Gbeg-Ggod-Ggog | 35 | 128 | 21 | 5.30303 |
| Gbeg-Ggod-Ggog-Hde-Hsa-Ppa-Ptre-Ptrs-Ptrt-Ptrv | 40 | 67 | 32 | 4.761905 |
| Ggod | 41 | 120 | 11 | 45.555556 |
| Ggod-Ggog | 2 | 3 | 0 | 10 |
| Hde | 11 | 24 | 6 | 13.75 |
| Hde-Hsa | 37 | 61 | 20 | 6.166667 |
| Hde-Hsa-Ppa-Ptre-Ptrs-Ptrt-Ptrv | 6 | 6 | 4 | 4.285714 |
| Pab | 7 | 7 | 5 | 3.888889 |
| Pab-Ppy | 90 | 149 | 64 | 6.206897 |
| Ppa | 7 | 18 | 5 | 3.5 |
| Ppa-Ptre-Ptrs-Ptrt-Ptrv | 57 | 144 | 34 | 12.954545 |
| Ppy | 4 | 5 | 4 | 2.222222 |
| Ptre | 1 | 1 | 1 | 1.111111 |
| Ptre-Ptrs-Ptrt-Ptrv | 1 | 1 | 0 | 1.111111 |
| Ptre-Ptrv | 0 | 0 | 0 | 0 |
| Ptrs | 1 | 1 | 0 | 1 |
| Ptrs-Ptrt | 0 | 0 | 0 | 0 |
| ils_Gbeg-Ggod-Ggog-Hde-Hsa | 3 | 3 | 2 | - |
| ils_Gbeg-Ggod-Ggog-Pab-Ppy | 7 | 11 | 6 | - |
| ils_Gbeg-Ggod-Ggog-Ppa-Ptre-Ptrs-Ptrt-Ptrv | 20 | 55 | 13 | - |

**Figure 6.3: A histogram of the number of genes with exons deleted per lineage is plotted in red. White boxes connected by black dotted lines represent the number of gene deletions per million years in each lineage. A 3-fold acceleration in the number of gene deletions is present in the chimpanzee-bonobo lineage.**

A list of deleted genes is provided in supplementary **Table 6.6.**

**<TABLE 6.6>**

**Homology of human lineage gene losses:** To determine if any of the ORFs deleted along the human lineage had homology to genes identified in other organisms or had been previously predicted as genes, we searched them against the NCBI RefSeq protein database. Of the 86 ORFs lost along the human lineage, 60 contained homology to 42 different genes (**Table 6.7**).

**Table 6.7: BLAST results of searching ORFs lost along the human lineage against the RefSeq protein database. We identified 42 significant hits to previously predicted genes/homologs.**

| lineage | reference | position | exons lost | BLAST result | e-value | HCEs |
| --- | --- | --- | --- | --- | --- | --- |
| Hde-Hsa | panTro3 | chr10:133269290-133306499 | 1 | gi|397467791|ref|XP_003805587.1| PREDICTED: putative scavenger receptor cysteine-rich domain-containing protein LOC619207-like [Pan paniscus] | 0.00E+00 | 30 |
| Hde-Hsa | panTro3 | chr16:21145204-21181787 | 3 | gi|402907936|ref|XP_003916716.1| PREDICTED: ATP-binding cassette sub-family A member 3-like [Papio anubis] | 8.65E-51 | 4 |
| Hde-Hsa | panTro3 | chr11:58411158-58441246 | 2 | gi|402893240|ref|XP_003909808.1| PREDICTED: membrane-spanning 4-domains subfamily A member 5-like [Papio anubis] | 3.52E-19 | 2 |
| Hde-Hsa | ponAbe2 | chr2a:16396704-16432475 | 1 | gi|297667005|ref|XP_002811788.1| PREDICTED: sulfotransferase 1C3-like [Pongo abelii] | 1.96E-119 | 6 |
| Hde-Hsa | panTro3 | chr19:43024841-43025176 | 1 | gi|403293043|ref|XP_003937533.1| PREDICTED: WD repeat-containing protein 87-like [Saimiri boliviensis boliviensis] | 6.79E-44 | 0 |
| Hde-Hsa | panTro3 | chr2B:171197850-171216575 | 1 | gi|397507773|ref|XP_003824361.1| PREDICTED: xin actin-binding repeat-containing protein 2 [Pan paniscus] | 8.54E-77 | 14 |
| Hde-Hsa | ponAbe2 | chr1:282764-292085 | 9 | gi|297281586|ref|XP_002802121.1| PREDICTED: hypothetical protein LOC100427314 [Macaca mulatta] | 1.51E-84 | 0 |
| Hde-Hsa | ponAbe2 | chr19:49725476-49755401 | 1 | gi|426389531|ref|XP_004061173.1| PREDICTED: caspase recruitment domain-containing protein 8 [Gorilla gorilla gorilla] | 0.00E+00 | 0 |
| Hde-Hsa | ponAbe2 | chr19:53072028-53077831 | 3 | gi|110835743|ref|NP_001036087.1| sialic acid-binding Ig-like lectin 13 precursor [Pan troglodytes] | 0.00E+00 | 4 |
| Hde-Hsa | panTro3 | chr6:28457142-28462847 | 1 | gi|55626286|ref|XP_527293.1| PREDICTED: 60S ribosomal protein L30-like [Pan troglodytes] | 6.23E-70 | 1 |
| Hde-Hsa | panTro3 | chr2A:4996171-5029725 | 1 | gi|114575954|ref|XP_001152938.1| PREDICTED: trafficking protein particle complex subunit 12 isoform 6 [Pan troglodytes] >gi|114575956|ref|XP_001153001.1| PREDICTED: trafficking protein particle complex subunit 12 isoform 7 [Pan troglodytes] | 5.05E-131 | 15 |
| Hde-Hsa | panTro3 | chr19:43029614-43030908 | 1 | gi|332206687|ref|XP_003252428.1| PREDICTED: hypothetical protein LOC100595862 [Nomascus leucogenys] | 0.00E+00 | 1 |
| Hde-Hsa | panTro3 | chr7:130910015-130968051 | 1 | gi|426357869|ref|XP_004046252.1| PREDICTED: protein FAM40B [Gorilla gorilla gorilla] | 0.00E+00 | 62 |
| Hde-Hsa | panTro3 | chr14:21311933-21312805 | 2 | gi|403264885|ref|XP_003924697.1| PREDICTED: uncharacterized protein LOC101031436 [Saimiri boliviensis boliviensis] | 4.98E-12 | 1 |
| Hde-Hsa | panTro3 | chr19:56318609-56324555 | 2 | gi|332241162|ref|XP_003269753.1| PREDICTED: LOW QUALITY PROTEIN: sialic acid-binding Ig-like lectin 13-like [Nomascus leucogenys] | 8.88E-131 | 0 |
| Hde-Hsa | panTro3 | chr8:912532-913202 | 1 | gi|156369634|ref|XP_001628080.1| predicted protein [Nematostella vectensis] | 3.86E-11 | 0 |
| Hde-Hsa | panTro3 | chr5:138992707-139049493 | 1 | gi|297676086|ref|XP_002815977.1| PREDICTED: M-phase inducer phosphatase 3 isoform 3 [Pongo abelii] | 0.00E+00 | 40 |
| Hde-Hsa | ponAbe2 | chr8:2039648-2040136 | 1 | gi|156389414|ref|XP_001634986.1| predicted protein [Nematostella vectensis] | 4.87E-12 | 0 |
| Hde-Hsa | panTro3 | chr16:21194196-21194660 | 2 | gi|403277334|ref|XP_003930322.1| PREDICTED: ATP-binding cassette sub-family A member 3-like [Saimiri boliviensis boliviensis] | 1.76E-48 | 3 |
| Hde-Hsa | ponAbe2 | chr22:42137786-42176624 | 1 | gi|426394877|ref|XP_004063711.1| PREDICTED: ceramide kinase [Gorilla gorilla gorilla] | 0.00E+00 | 16 |
| Hde-Hsa | panTro3 | chr6:52707714-52798280 | 1 | gi|297678352|ref|XP_002817041.1| PREDICTED: fibrocystin, partial [Pongo abelii] | 0.00E+00 | 102 |
| Hde-Hsa | panTro3 | chr20:23615403-23618960 | 3 | gi|332263715|ref|XP_003280898.1| PREDICTED: cystatin-12-like [Nomascus leucogenys] | 3.58E-97 | 1 |
| Hde-Hsa | panTro3 | chr6:41677792-41687234 | 2 | gi|332824003|ref|XP_003311331.1| PREDICTED: adenylate cyclase type 10-like [Pan troglodytes] | 2.33E-153 | 16 |
| ils_Gbeg-Ggod-Ggog-Hde-Hsa | panTro3 | chr1:190489209-190523588 | 1 | gi|397486258|ref|XP_003814247.1| PREDICTED: putative uncharacterized protein encoded by LINC00467-like [Pan paniscus] >gi|410034417|ref|XP_001170038.2| PREDICTED: putative uncharacterized protein encoded by LINC00467-like [Pan troglodytes] | 2.93E-44 | 0 |
| Hde-Hsa-Ppa-Ptre-Ptrs-Ptrt-Ptrv | ponAbe2 | chr12:96567618-96581976 | 1 | gi|359065249|ref|XP_002687265.2| PREDICTED: uncharacterized protein LOC100336892 [Bos taurus] | 1.99E-24 | 4 |
| Hde-Hsa-Ppa-Ptre-Ptrs-Ptrt-Ptrv | ponAbe2 | chr22:17209875-17273295 | 1 | gi|395753054|ref|XP_003779528.1| PREDICTED: immunoglobulin omega chain-like [Pongo abelii] | 8.11E-64 | 30 |
| Hde-Hsa-Ppa-Ptre-Ptrs-Ptrt-Ptrv | ponAbe2 | chr10:132702048-132702523 | 1 | gi|410044564|ref|XP_003951836.1| PREDICTED: uncharacterized protein LOC101059682 [Pan troglodytes] | 4.63E-16 | 0 |
| Gbeg-Ggod-Ggog-Hde-Hsa-Ppa-Ptre-Ptrs-Ptrt-Ptrv | ponAbe2 | chr11:101294540-101308678 | 2 | gi|395743436|ref|XP_003777927.1| PREDICTED: caspase-12-like [Pongo abelii] | 0.00E+00 | 9 |
| Gbeg-Ggod-Ggog-Hde-Hsa-Ppa-Ptre-Ptrs-Ptrt-Ptrv | ponAbe2 | chr2b:134898141-134898734 | 2 | gi|291233023|ref|XP_002736453.1| PREDICTED: hypothetical protein [Saccoglossus kowalevskii] | 2.14E-10 | 0 |
| Gbeg-Ggod-Ggog-Hde-Hsa-Ppa-Ptre-Ptrs-Ptrt-Ptrv | ponAbe2 | chr2a:112233060-112237384 | 2 | gi|259500926|ref|ZP_05743828.1| conserved hypothetical protein [Lactobacillus iners DSM 13335] | 7.09E-10 | 1 |
| Gbeg-Ggod-Ggog-Hde-Hsa-Ppa-Ptre-Ptrs-Ptrt-Ptrv | ponAbe2 | chr18:76813671-76836046 | 3 | gi|395749962|ref|XP_002828334.2| PREDICTED: uncharacterized protein LOC100442861 [Pongo abelii] | 0.00E+00 | 9 |
| Gbeg-Ggod-Ggog-Hde-Hsa-Ppa-Ptre-Ptrs-Ptrt-Ptrv | ponAbe2 | chr18:17861680-17863215 | 1 | gi|338728618|ref|XP_003365712.1| PREDICTED: zinc finger protein 791-like [Equus caballus] | 9.54E-25 | 2 |
| Gbeg-Ggod-Ggog-Hde-Hsa-Ppa-Ptre-Ptrs-Ptrt-Ptrv | ponAbe2 | chr11:1058088-1058715 | 1 | gi|50290505|ref|XP_447684.1| hypothetical protein [Candida glabrata CBS 138] | 3.61E-09 | 0 |
| Gbeg-Ggod-Ggog-Hde-Hsa-Ppa-Ptre-Ptrs-Ptrt-Ptrv | ponAbe2 | chr16:61628302-61629469 | 1 | gi|395748070|ref|XP_003778708.1| PREDICTED: exosome complex component MTR3 [Pongo abelii] | 7.26E-80 | 2 |
| Gbeg-Ggod-Ggog-Hde-Hsa-Ppa-Ptre-Ptrs-Ptrt-Ptrv | ponAbe2 | chr8:153430204-153431184 | 1 | gi|46094068|ref|NP_689818.2| zinc finger protein 781 [Homo sapiens] | 1.26E-10 | 0 |
| Gbeg-Ggod-Ggog-Hde-Hsa-Ppa-Ptre-Ptrs-Ptrt-Ptrv | ponAbe2 | chr7:149328103-149493757 | 1 | gi|33186925|ref|NP_057287.2| 5'-AMP-activated protein kinase subunit gamma-2 isoform a [Homo sapiens] >gi|332870104|ref|XP_003318972.1| PREDICTED: 5'-AMP-activated protein kinase subunit gamma-2 isoform 1 [Pan troglodytes] | 7.45E-113 | 28 |
| Gbeg-Ggod-Ggog-Hde-Hsa-Ppa-Ptre-Ptrs-Ptrt-Ptrv | ponAbe2 | chr19:40740646-40741970 | 1 | gi|402905533|ref|XP_003915572.1| PREDICTED: eosinophil lysophospholipase-like [Papio anubis] | 1.75E-04 | 0 |
| Gbeg-Ggod-Ggog-Hde-Hsa-Ppa-Ptre-Ptrs-Ptrt-Ptrv | ponAbe2 | chr6:27923306-27923676 | 1 | gi|350586447|ref|XP_001928408.4| PREDICTED: hypothetical protein LOC100155756 [Sus scrofa] | 1.69E-07 | 0 |
| Gbeg-Ggod-Ggog-Hde-Hsa-Ppa-Ptre-Ptrs-Ptrt-Ptrv | ponAbe2 | chr18:17828711-17861419 | 4 | gi|426387972|ref|XP_004060436.1| PREDICTED: zinc finger protein 14 [Gorilla gorilla gorilla] | 2.92E-36 | 2 |
| Gbeg-Ggod-Ggog-Hde-Hsa-Ppa-Ptre-Ptrs-Ptrt-Ptrv | ponAbe2 | chr1:67094355-67101144 | 1 | gi|114568366|ref|XP_001163353.1| PREDICTED: neutrophil cytosol factor 2 isoform 3 [Pan troglodytes] >gi|114568368|ref|XP_001163464.1| PREDICTED: neutrophil cytosol factor 2 isoform 5 [Pan troglodytes] | 5.01E-49 | 3 |
| Gbeg-Ggod-Ggog-Hde-Hsa-Ppa-Ptre-Ptrs-Ptrt-Ptrv | ponAbe2 | chr19:40600114-40600861 | 1 | gi|297277044|ref|XP_001088117.2| PREDICTED: galactoside-binding soluble lectin 13-like [Macaca mulatta] | 3.79E-09 | 0 |
| Gbeg-Ggod-Ggog-Hde-Hsa-Ppa-Ptre-Ptrs-Ptrt-Ptrv | ponAbe2 | chr19:53342284-53344161 | 1 | gi|426389932|ref|XP_004061370.1| PREDICTED: zinc finger protein 649 [Gorilla gorilla gorilla] | 0.00E+00 | 3 |
| Gbeg-Ggod-Ggog-Hde-Hsa-Ppa-Ptre-Ptrs-Ptrt-Ptrv | ponAbe2 | chr2b:90877161-90887811 | 1 | gi|109100506|ref|XP_001089951.1| PREDICTED: formimidoyltransferase-cyclodeaminase-like [Macaca mulatta] | 6.42E-112 | 16 |
| Gbeg-Ggod-Ggog-Hde-Hsa-Ppa-Ptre-Ptrs-Ptrt-Ptrv | ponAbe2 | chrUn:28367950-28368823 | 1 | gi|297265250|ref|XP_001107481.2| PREDICTED: hypothetical protein LOC716637 [Macaca mulatta] | 4.68E-36 | 0 |

# Section 7: Gene duplication analysis

**Gene duplications:** Lineage-specific duplication segments were each assessed for their underlying gene content. RefSeq gene models, collapsed by 80% reciprocal overlap, were used for this analysis. Since many duplicated genes are represented multiple times within the human reference, we avoid over counting lineage-specific gene duplicates for each set of genes identified in a lineage by performing pairwise *bl2seq* (NCBI) alignments between all genic, duplicated segments. If two duplicated genes were found to align to each other with >90% identity reciprocally over at least 10% of their length, they were clustered together as paralogous. Finally, paralogous gene clusters were manually curated.

In total, 405 genes were identified as lineage-specific duplications with the criteria that at least 50% of the gene model be duplicated (**Figure 7.1, Figure 7.2, Table 7.1**)**.** An increased rate of gene duplication was observed in the African great ape, gorilla, and the human-chimpanzee ancestors with the rate in the human-chimpanzee ancestor showing an ~1.5-fold higher rate than the next highest rate of duplication—the African great ape ancestor (19.3 genes/MY versus 13 genes/MY; **Table 7.2**). **Table 7.1** contains a list of all lineage-specific duplicated genes in great apes. We additionally identified 103 genes duplicated in multiple lineages yet expanded to markedly higher copy in one particular lineage (**Table 7.3**). A heatmap of gene duplications, deletions, and expansions is shown in **Figure 7.3.**

**Figure 7.1: Bar chart of the number of lineage-specific gene duplications stratified by the fraction of the gene duplicated.**

**<TABLE 7.1>Table 7.2: Counts of lineage-specific gene duplications and rates per million years (MY) of gene duplication in each lineage.**

| lineage | duplicated_genes | duplications/MY |
| --- | --- | --- |
| Ggod-Ggog | 2 | 10 |
| Gbeg-Ggod-Ggog | 55 | 8.333333333 |
| Gbeg-Ggod-Ggog-Hde-Hsa-Ppa-Ptre-Ptrs-Ptrt-Ptrv | 109 | 12.97619048 |
| Hde | 1 | 1.25 |
| Hde-Hsa | 31 | 5.166666667 |
| Hde-Hsa-Ppa-Ptre-Ptrs-Ptrt-Ptrv | 27 | 19.28571429 |
| Ppa-Ptre-Ptrs-Ptrt-Ptrv | 24 | 5.454545455 |
| Ppa | 4 | 2 |
| Ppy | 1 | 0.555555556 |
| Pab-Ppy | 63 | 4.344827586 |
| Gbeg | 1 | 0.833333333 |
| Ptre-Ptrs-Ptrt-Ptrv | 8 | 8.888888889 |
| Hsa | 4 | 5 |
| Pab | 2 | 1.111111111 |

**<Table 7.3>**

**Figure 7.2 (following pages): Lineage-specific gene duplication boxplots for the copy number of each gene in all species assessed in this study.**

**Figure 7.3: Heatmap representation of all lineage-specific gene duplications, deletions, and expansions identified throughout the great ape lineage.**

**Figure 7.4: Heatmap of the 16p11.2 locus. The *BOLA2* and *BOLA2B* gene are highlighted in addition to the approximate breakpoints of the 16p11.2 micro-duplication/micro-deletion. *BOLA2* exhibits the ancestral copy number state.**

# Section 8: Distribution of duplication and deletion events

We assessed the position of lineage-specific gene duplications in relation to each other along the genome and found them to be significantly non-uniformly distributed (**Figures 8.1, 8.2 a,b,c,d,e**). Duplicated genes instead clustered into distinct cores of activity.

**Figure 8.1: Cumulative histogram of the distance between lineage-specific gene duplicates. More than 50% of all gene duplicates lie within 100 kbp of each other.**

#

**Figure 8.2a: Human-specific gene duplications plotted on a chromosome ideogram show gene duplications clustered together. Lineage-specific duplicated segments are plotted to the right of each chromosome ideogram as arrows with their bases scaled by 10 for visibility.**

#

**Figure 8.2b: Gorilla-specific gene duplications plotted on a chromosome ideogram are also clustered together.**

**Figure 8.2c: Orangutan-specific gene duplications plotted on a chromosome ideogram.**

#

**Figure 8.2d: Human, chimpanzee, and bonobo shared gene duplications plotted on a chromosome ideogram.**

**Figure 8.2e: African great ape-specific gene duplications plotted on a chromosome ideogram.**

**Distribution of SDs and deletions:** We have previously observed that lineage-specific duplications tend to arise adjacent to ancestral duplications, a phenomenon we have termed *duplication shadowing*(Cheng et al. 2005; Marques-Bonet et al. 2009). We tested that association again here (using a permutation test method)(Marques-Bonet et al. 2009) and found that indeed lineage-specific duplications were highly enriched near to ancestral duplications (P<0.0002, **Table 8.1**). We were curious whether this phenomenon held true for deletions as well. Lineage-specific deletions did not tend to arise adjacent to ancestral deletions (P>0.2, **Table 8.1**), and additionally, no association with SDs was observed either (P>0.2, **Table 8.1**).

**Table 8.1: Association of lineage-specific duplication and deletion events with each other. As we previously reported, we find that lineage-specific SDs tend to emerge adjacent to ancestral SDs. We also tested if deletions emerged adjacent to ancestral deletions or SDs and found no association. For loci lost along the human lineage, only deletions flanked by regions that could unambiguously be placed in HG18 were considered.**

| Comparison | test events | reference events | test within 5 kbp of reference | P-value |
| --- | --- | --- | --- | --- |
| human duplications with human/chimp duplications | 279 | 268 | 30 | P<0.0002 |
| chimp duplications with human/chimp duplications | 115 | 268 | 12 | P<0.0002 |
| Bonobo duplications with human/chimp duplications | 51 | 268 | 2 | P=0.0214 |
| human/chimp duplications with human/chimp/gorilla duplications | 268 | 1172 | 125 | P<0.0002 |
| gorilla duplications with human/chimp/gorilla duplications | 238 | 1172 | 28 | P<0.0002 |
| orangutan duplications with human/chimp/gorilla/orangutan ancestral duplications | 549 | 7077 | 116 | P<0.0002 |
| gorilla deletions with gorilla duplications | 469 | 238 | 1 | P=0.8200 |
| gorilla deletions with human/chimp/gorilla duplications | 469 | 1172 | 5 | P=0.8900 |
| gorilla deletions with human/chimp duplications | 459 | 268 | 2 | P=0.5500 |
| human deletions with human/chimp/ duplications | 331 | 268 | 1 | P=0.7600 |
| human/chimp deletions with human/chimp/gorilla duplications | 65 | 1172 | 0 | P=1.0000 |
| human/chimp/gorilla deletions with human/chimp/gorilla/orangutan duplications | 372 | 7077 | 47 | P=1.0000 |
| human deletions with human/chimp ancestral deletions | 331 | 74 | 7 | P=0.2300 |
| gorilla deletions with human/chimp/gorilla ancestral deletions | 469 | 422 | 39 | P=1.0000 |
| human/chimp deletions with human/chimp/gorilla ancestral deletions | 65 | 422 | 10 | P=0.6500 |

# Section 9: Rates of segmental duplication and deletion and underlying genes

As we have identified SNPs and substitutions in the same individuals assessed for structural variants, we can compute precise estimates of the rates of duplication and deletion as a function of the number of substitutions along a branch. Additionally, the divergence times of each of the species assessed can be computed precisely from genetic divergence estimates. We have previously described a likelihood framework for testing the significance of changes in duplication rate observed throughout a phylogeny(Marques-Bonet et al. 2009). In this likelihood framework, the null model assumes a constant rate among all branches while in the test model the rates vary among different branches. All tests were performed in units of duplications per million years, with divergence times estimated from exact substitution rates, and in units of duplications per substitution.

**Rates of SD:** We have previously shown an acceleration in the rate of duplication in the African great ape ancestor(Marques-Bonet et al. 2009) and additionally an acceleration of the duplication rate in the gorilla lineage(Ventura et al. 2011). We confirmed these two findings by assessing the rate of ancient duplication among all branches in the tree. The four subspecies of chimpanzee were considered as a single population. Three models were tested against a null model of a constant duplication rate of duplication along all branches:

- **An accelerated rate in the African great ape ancestor,**
- **An accelerated rate in the African great ape ancestor, the gorilla ancestor, and the human-chimpanzee ancestor, and**
- **Differing rates of duplication among all branches of the tree.**

Each of these three models is highly significant compared the null model (**Table 9.1**); however, the tree is best explained by a model in which there is an accelerated rate of duplication in the African great ape and gorilla ancestors in addition to the ancestor of human and chimpanzee. This supports a model in which a burst of duplication activity occurred in the African great ape ancestor which subsequently rapidly declined in the ancestor of human and chimpanzee and declined more slowly in the gorilla lineage.

**Table 9.1: Duplication rates along the great ape lineage.**

| description | units | Model 1 | Model 2 | degrees of freedom | p-value |
| --- | --- | --- | --- | --- | --- |
| acceleration in African great ape against all other branches | Mb/My | λ=3.030 | λ1 = 2.127 | 1 | 6.73E-13 |
| λ2 = 7.501 |
| bp/sub | λ=1.197 | λ1 = 0.841 | 1 | 7.00E-13 |
| λ2 = 2.961 |
| sites/MY | λ=30.006 | λ1 = 17.659 | 1 | <1.138e-202 |
| λ2 = 91.155 |
| acceleration in African great ape and gorilla and human-chimp linages against all branches | Mb/My | λ=3.030 | λ1 = 1.496 | 1 | 1.21E-17 |
| λ2 = 6.173 |
| bp/sub | λ=1.197 | λ1 = 0.592 | 1 | 1.53E-17 |
| λ2 = 2.432 |
| sites/MY | λ=30.006 | λ1 = 14.943 | 1 | <7.529e-157 |
| λ2 = 60.866 |
| different rates among all branches | Mb/My | λ=3.030 | λ1 = 0.266 | 12 | 3.00E-14 |
| λ2 = 7.501 |
| λ3 = 4.984 |
| λ4 = 3.809 |
| λ5 = 1.649 |
| λ6 = 1.119 |
| λ7 = 0.547 |
| λ8 = 1.210 |
| λ9 = 0.470 |
| λ10 = 0.528 |
| λ11 = 2.147 |
| λ12 = 0.341 |
| λ13 = 2.104 |
| bp/sub | λ=1.197 | λ1 = 0.108 | 12 | 3.48E-14 |
| λ2 = 2.961 |
| λ3 = 1.965 |
| λ4 = 1.476 |
| λ5 = 0.647 |
| λ6 = 0.434 |
| λ7 = 0.216 |
| λ8 = 0.484 |
| λ9 = 0.178 |
| λ10 = 0.215 |
| λ11 = 0.849 |
| λ12 = 0.132 |
| λ13 = 0.863 |

**Gene duplication rates:** We next tested if the increase in duplication rate in African great ape ancestor, gorilla and human-chimpanzee ancestral lineages had led to a significant increase in the rate of gene duplication (**Table 9.2**). Indeed, the rate of gene duplication in these lineages was ~2.8-fold higher than throughout the rest of the tree (P=1.66e-20). We also observed a ~1.5-fold excess in the rate of gene duplication in the human-chimpanzee ancestral branch compared to the African great ape ancestral branch and the gorilla branch, which was weakly significant (P=0.0107).

**Table 9.2: Rates of lineage-specific gene duplication.**

| **description** | **units** | **Model 1** | **Model 2** | **degrees of freedom** | **p-value** |
| --- | --- | --- | --- | --- | --- |
| acceleration in the rate of gene duplication in the African great ape, gorilla and human-chimpanzee lineages against all branches | genes/MY | λ=6.620 | λ1 = 4.167 | 1 | 1.66E-20 |
| λ2 = 11.646 |
| genes/sub | λ=2.616 | λ1 = 1.649 | 1 | 2.42E-20 |
| λ2 = 4.588 |
| acceleration in the rate of gene duplication in human-chimp lineage compared to the gorilla and African great ape lineages | genes/MY | λ=11.646 | λ1 = 10.933 | 1 | 0.0107 |
| λ2 = 19.286 |
| genes/sub | λ=4.588 | λ1 = 4.313 | 1 | 0.01323 |
| λ2 = 7.474 |

**Rates of lineage-specific deletion and gene loss:** We observed a ~2-fold increase in the rate of deletion along the chimpanzee-bonobo lineage. We found this increase to be highly statistically significant (**Table 9.3,** P=4.79X10-9). In addition, the associated rate of gene loss along this branch is also highly statistically significant (P=4.4X10-8). Amongst the other branches, the rate of deletion and the associated rate of gene loss appear to be more clocklike. We cannot reject the null model (of clocklike) in either of these cases (P=0.03 and P=0.6). Analyses were also performed just for deletions >5kbp, (**Table 9.4**), showing a strong trend

**Table 9.3: Rates of lineage-specific deletion and gene loss.**

| description | units | Model 1 | Model 2 | degrees of freedom | p-value |
| --- | --- | --- | --- | --- | --- |
| acceleration in the rate of deletion along the chimpanzee-bonobo ancestral branch compared to all other branches | ckbp/MY | λ=9.072 | λ1 = 8.189 | 1 | 4.79E-09 |
| λ2 = 18.054 |
| bp/kb-sub | λ=3.587 | λ1 = 3.240 | 1 | 6.63E-09 |
| λ2 = 7.086 |
| sites/MY | λ=114.842 | λ1 = 110.829 | 1 | 7.13E-13 |
| λ2 = 151.136 |
| genes/MY | λ=6.034 | λ1 = 5.318 | 1 | 4.40E-08 |
| λ2 = 12.955 |
| genes/subs | λ=2.385 | λ1 = 2.103 | 1 | 5.57E-08 |
| λ2 = 5.085 |
| differing rate of deletion in all non-chimpanzee-bonobo ancestor branches (reject clocklike) | kbp/MY | λ=8.918 | λ1 = 7.626 | 5 | 0.03123 |
| λ2 = 8.919 |
| λ3 = 8.801 |
| λ4 = 10.392 |
| λ5 = 7.172 |
| λ6 = 11.668 |
| bp/kb-sub | λ=3.526 | λ1 = 3.012 | 5 | 0.03557 |
| λ2 = 3.660 |
| λ3 = 3.411 |
| λ4 = 4.102 |
| λ5 = 2.868 |
| λ6 = 4.600 |
| genes/MY | λ=5.660 | λ1 = 6.207 | 5 | 0.6271 |
| λ2 = 10.000 |
| λ3 = 4.286 |
| λ4 = 4.762 |
| λ5 = 6.167 |
| λ6 = 5.303 |
| sites/MY | λ=113.767 | λ1 = 76.621 | 4 | 1.82E-72 |
| λ2 = 152.143 |
| λ3 = 141.071 |
| λ4 = 153.167 |
| λ5 = 116.667 |
| excluding orangutan | sites/MY | λ=137.812 | λ1 = 116.667 | 3 | 1.12E-07 |
| λ2 = 152.143 |
| λ3 = 141.071 |
| λ4 = 153.167 |

**Table 9.4: Rates of lineage-specific deletion for sites >5kb.**

| description | units | Model 1 | Model 2 | degrees of freedom | p-value |
| --- | --- | --- | --- | --- | --- |
| acceleration in the rate of deletion along the chimpanzee-bonobo ancestral branch compared to all other branches | ckbp/MY | λ=7.778 | λ1 = 6.836 | 1 | 2.08E-09 |
| λ2 = 16.304 |
| bp/10-sub | λ=3.072 | λ1 = 2.702 | 1 | 2.72E-09 |
| λ2 = 6.399 |
| sites/MY | λ=50.837 | λ1 = 45.704 | 1 | 1.85E-38 |
| λ2 = 97.273 |
| genes/MY | λ=6.282 | λ1 = 5.527 | 1 | 1.60E-07 |
| λ2 = 12.955 |
| genes/subs | λ=2.482 | λ1 = 2.186 | 1 | 2.00E-07 |
| λ2 = 5.085 |
| differing rate of deletion in all non-chimpanzee-bonobo ancestor branches (reject clock like) | kbp/MY | λ=6.812 | λ1 = 6.365 | 4 | 0.0003297 |
| λ2 = 5.761 |
| λ3 = 7.478 |
| λ4 = 3.655 |
| λ5 = 10.100 |
| bp/10-sub | λ=2.693 | λ1 = 2.514 | 4 | 0.000414 |
| λ2 = 2.233 |
| λ3 = 2.952 |
| λ4 = 1.462 |
| λ5 = 3.981 |
| genes/MY | λ=5.637 | λ1 = 6.207 | 4 | 0.5693 |
| λ2 = 4.286 |
| λ3 = 4.762 |
| λ4 = 6.167 |
| λ5 = 5.303 |
| sites/MY | λ=46.152 | λ1 = 38.759 | 4 | 3.35E-20 |
| λ2 = 47.143 |
| λ3 = 46.548 |
| λ4 = 37.333 |
| λ5 = 69.697 |
| excluding orangutan | sites/MY | λ=50.938 | λ1 = 69.697 | 3 | 8.61E-15 |
| λ2 = 47.143 |
| λ3 = 46.548 |
| λ4 = 37.333 |

# Section 10: Copy number variation and duplication diversity

**Copy number variants and copy number polymorphic loci:** Copy number polymorphic loci and copy number variants were identified using a digital array comparative genomic hybridization (dCGH) strategy(Sudmant et al. 2010), in combination with the above scale-space filtering-based segmentation approach. Briefly, for a particular species, one individual is assigned to be a *reference* sample. A comparative copy number signal between *test* individuals from each species and their respective references is then generated from the log2 ratio of the 500 bp tiled window copy number estimates between the two samples. These log2 ratios are then segmented into blocks of respective ‘gain’ and ‘loss’ using the above segmentation procedure. CNPs identified in high GC loci were then filtered out if the GC content of the CNP was >0.55 or if the mean copy number of individuals with known GC biases differed by >0.5 from unbiased individuals. 18 individuals were excluded from this analysis as GC bias prevented them from being compared to nonbiased samples. CNPs encompassing fewer than four 500 bp windows of unmasked sequence were discarded to enrich for true positives effectively imposing a 2 kbp size constraint on discovered events. To maximize sensitivity, for each species every individual in turn was selected as the *reference* genome and compared against all other genomes. A total of 2062 individual dCGH comparisons were performed and a total of 6406 events discovered (**Table 10.1**). Though the minimum size of CNPs discovered was 2 kbp, as a minimum of four 500 bp windows of unmasked sequence was required to discover a CNP, the median size was much larger (8061 bp; **Figure 10.1**).

**Table 10.1: CNPs discovered among 80 great apes.**

|  | private | | segregating | | | total | | θ | |
| --- | --- | --- | --- | --- | --- | --- | --- | --- | --- |
| *species* | **deletion** | **duplication** | **duplication** | **deletion** | **duplication/deletion** | **private** | **segregating** | **CNVs (per genome)** | **bp (per base)** |
| *Sumatran_orangutan* | 430 | 71 | 226 | 114 | 65 | 501 | 405 | 122.05 | 0.0029 |
| *Bornean_orangutan* | 296 | 61 | 149 | 108 | 53 | 357 | 310 | 97.48 | 0.002 |
| *Human* | 203 | 182 | 113 | 38 | 29 | 385 | 180 | 49.38 | 0.0013 |
| *Bonobo* | 340 | 68 | 147 | 89 | 29 | 408 | 265 | 77.04 | 0.0012 |
| *Eastern_chimpanzee* | 466 | 135 | 107 | 78 | 21 | 601 | 206 | 68.21 | 0.002 |
| *Western_chimpanzee* | 242 | 61 | 49 | 37 | 20 | 303 | 106 | 37.47 | 0.001 |
| *Nigerian-Cameroon_chimpanzee* | 198 | 43 | 132 | 35 | 30 | 241 | 197 | 55.53 | 0.0018 |
| *Central_chimpanzee* | 581 | 232 | - | - | - | 813 | - | - | 0.0024 |
| *Western_gorilla* | 402 | 130 | 287 | 92 | 39 | 532 | 418 | 98.27 | 0.002 |
| *Eastern_gorilla* | 114 | 60 | - | - | - | 174 | 0 | - | 0.0009 |

**Figure 10.1: Distribution of CNP sizes shown in standard and log-scale. The median CNP size was 8061 bp.**

We next assessed the number, and size distribution of discovered CNVs on a per-individual basis, to determine if any individuals in particular showed aberrantly more or larger CNVs (**Table 10.2**). The results are summarized in **Figure 10.2** with all individuals of a particular species demonstrating a similar number of CNVs on average, with four potential outliers showing excess numbers of deletions. The first outlier, Nyango, is the only Cross River Gorilla sample assessed in our study. We note that this individual shows both signals of recent inbreeding and exceedingly low diversity, (Prado and Sudmant *et al – in* press) in addition to a unique demographic history and reduced Ne. Though interesting, it is hard to draw conclusions from this single individuals excess of deletions. The other three individuals are a central chimpanzee, of which only two individuals were assessed, a Bornean orangutan and a Sumatran orangutan. The two orangutans are not outliers among the orangutan samples with respect to sequence coverage, nor is the central chimpanzee. We thus find no apparent reason to purge these individuals from our analyses, however, we note that all reported results on population diversity are robust to the removal of these individuals, and indeed, none of the significant signals reported is related to any of these individuals. Finally, we assessed the distribution of CNV lengths among the 80 great apes analyzed for CNV diversity in this study (**Figure 10.3**). We noted that for almost all individuals the length distributions of deletions and duplications were very similar as one would expect for a random sampling of CNVs. Additionally, size distributions were consistent among individuals of the same species and largely between species as well. Interestingly, the human individuals consistently exhibited a slight excess of longer deletions, perhaps as a result of the human reference genome being biased towards a particular set of CNV alleles.

**Figure 10.2: Summary of the number of duplications and deletions discovered per individual and grouped by species.**

**Table 10.2: The number of CNV duplications and deletions discovered per individual.**

| indiv | species | duplications | deletions |
| --- | --- | --- | --- |
| Pongo_abelii-KB9258_Bubbles | Pongo_abelii | 77 | 293 |
| Pongo_abelii-A953_Vicki | Pongo_abelii | 87 | 90 |
| Pongo_abelii-A949_Dunja | Pongo_abelii | 70 | 70 |
| Pongo_abelii-KB4661_Dolly | Pongo_abelii | 66 | 107 |
| Pongo_abelii-KB5883_Likoe | Pongo_abelii | 70 | 97 |
| Pongo_abelii-A947_Elsi | Pongo_abelii | 67 | 70 |
| Pongo_abelii-SB550_Sibu | Pongo_abelii | 50 | 109 |
| Pongo_abelii-KB4361_Dennis | Pongo_abelii | 45 | 97 |
| Pongo_pygmaeus-KB5543_Baldy | Pongo_pygmaeus | 83 | 212 |
| Pongo_pygmaeus-KB4204_Dinah | Pongo_pygmaeus | 44 | 73 |
| Pongo_pygmaeus-KB5406_Doris | Pongo_pygmaeus | 55 | 107 |
| Pongo_pygmaeus-A939_Nonja | Pongo_pygmaeus | 81 | 80 |
| Pongo_pygmaeus-KB5404_Billy | Pongo_pygmaeus | 48 | 69 |
| Pongo_pygmaeus-KB5405_Louis | Pongo_pygmaeus | 64 | 87 |
| Pongo_pygmaeus-A944_Napoleon | Pongo_pygmaeus | 61 | 84 |
| Homo_denisova-Denisova_30x | Homo_denisova | 32 | 28 |
| Homo_sapiens-Han_HGDP00778 | Homo_sapiens | 36 | 45 |
| Homo_sapiens-Dai_HGDP01307 | Homo_sapiens | 18 | 50 |
| Homo_sapiens-Yoruba_HGDP00927 | Homo_sapiens | 35 | 73 |
| Homo_sapiens-Mbuti_HGDP00456 | Homo_sapiens | 35 | 76 |
| Homo_sapiens-San_HGDP01029 | Homo_sapiens | 36 | 74 |
| Homo_sapiens-Karitiana_HGDP00998 | Homo_sapiens | 129 | 42 |
| Homo_sapiens-Sardinian_HGDP00665 | Homo_sapiens | 37 | 48 |
| Homo_sapiens-French_HGDP00521 | Homo_sapiens | 23 | 55 |
| Homo_sapiens-Papuan_HGDP00542 | Homo_sapiens | 20 | 47 |
| Homo_sapiens-Madenka_HGDP01284 | Homo_sapiens | 29 | 86 |
| Pan_paniscus-A925_Bono | Pan_paniscus | 43 | 78 |
| Pan_paniscus-A923_Kombote | Pan_paniscus | 31 | 73 |
| Pan_paniscus-9731_LB502 | Pan_paniscus | 59 | 140 |
| Pan_paniscus-A918_Hermien | Pan_paniscus | 38 | 66 |
| Pan_paniscus-A919_Desmond | Pan_paniscus | 30 | 68 |
| Pan_paniscus-A927_Salonga | Pan_paniscus | 40 | 83 |
| Pan_paniscus-X00095_Kakowet | Pan_paniscus | 62 | 153 |
| Pan_paniscus-A926_Natalie | Pan_paniscus | 28 | 58 |
| Pan_paniscus-A915_Kosana | Pan_paniscus | 26 | 67 |
| Pan_troglodytes_ellioti-Tobi | Pan_troglodytes | 21 | 96 |
| Pan_troglodytes_schweinfurthii-A911_Kidongo | Pan_troglodytes | 53 | 147 |
| Pan_troglodytes_verus-9668_Bosco | Pan_troglodytes | 46 | 98 |
| Pan_troglodytes_verus-9730_Donald | Pan_troglodytes | 53 | 103 |
| Pan_troglodytes_schweinfurthii-Yolanda | Pan_troglodytes | 48 | 223 |
| Pan_troglodytes_ellioti-Julie | Pan_troglodytes | 26 | 85 |
| Pan_troglodytes_ellioti-Taweh | Pan_troglodytes | 23 | 81 |
| Pan_troglodytes_ellioti-Basho | Pan_troglodytes | 28 | 84 |
| Pan_troglodytes_schweinfurthii-A912_Nakuu | Pan_troglodytes | 53 | 105 |
| Pan_troglodytes_ellioti-Banyo | Pan_troglodytes | 30 | 76 |
| Pan_troglodytes_schweinfurthii-9729_Harriet | Pan_troglodytes | 77 | 116 |
| Pan_troglodytes_ellioti-Paquita | Pan_troglodytes | 23 | 84 |
| Pan_troglodytes_schweinfurthii-100040_Andromeda | Pan_troglodytes | 127 | 262 |
| Pan_troglodytes_schweinfurthii-100037_Vincent | Pan_troglodytes | 55 | 98 |
| Pan_troglodytes_troglodytes-A960_Clara | Pan_troglodytes | 214 | 542 |
| Pan_troglodytes_ellioti-Koto | Pan_troglodytes | 25 | 77 |
| Pan_troglodytes_ellioti-Kopongo | Pan_troglodytes | 21 | 90 |
| Pan_troglodytes_verus-A907_Susie_A | Pan_troglodytes | 53 | 84 |
| Pan_troglodytes_verus-X00100_Koby | Pan_troglodytes | 50 | 198 |
| Pan_troglodytes_ellioti-Akwaya_Jean | Pan_troglodytes | 29 | 79 |
| Pan_troglodytes_ellioti-Damian | Pan_troglodytes | 26 | 86 |
| Pan_troglodytes_troglodytes-A958_Doris | Pan_troglodytes | 247 | 126 |
| Pan_troglodytes_verus-Clint | Pan_troglodytes | 43 | 86 |
| Gorilla_gorilla_gorilla-9753_Kokomo | Gorilla_gorilla | 26 | 92 |
| Gorilla_gorilla_gorilla-A936_Coco | Gorilla_gorilla | 35 | 68 |
| Gorilla_gorilla_gorilla-A935_Fritz | Gorilla_gorilla | 38 | 84 |
| Gorilla_gorilla_gorilla-KB5852_Helen | Gorilla_gorilla | 39 | 87 |
| Gorilla_gorilla_gorilla-9751_Bulera | Gorilla_gorilla | 33 | 93 |
| Gorilla_gorilla_gorilla-A932_Mimi | Gorilla_gorilla | 38 | 91 |
| Gorilla_gorilla_gorilla-Snowflake | Gorilla_gorilla | 57 | 86 |
| Gorilla_gorilla_gorilla-KB7973_Porta | Gorilla_gorilla | 33 | 86 |
| Gorilla_gorilla_gorilla-KB5792_Carolyn | Gorilla_gorilla | 39 | 87 |
| Gorilla_gorilla_gorilla-KB4986_Katie | Gorilla_gorilla | 36 | 75 |
| Gorilla_beringei_graueri-A929_Kaisi | Gorilla_beringei | 130 | 101 |
| Gorilla_gorilla_gorilla-9752_Suzie | Gorilla_gorilla | 35 | 94 |
| Gorilla_gorilla_gorilla-9749_Kowali | Gorilla_gorilla | 20 | 87 |
| Gorilla_gorilla_gorilla-X00109_Tzambo | Gorilla_gorilla | 41 | 108 |
| Gorilla_beringei_graueri-9732_Mkubwa | Gorilla_beringei | 127 | 90 |
| Gorilla_gorilla_dielhi-B646_Nyango | Gorilla_gorilla | 77 | 252 |
| Gorilla_gorilla_gorilla-KB3782_Vila | Gorilla_gorilla | 35 | 79 |
| Gorilla_gorilla_gorilla-9750_Azizi | Gorilla_gorilla | 37 | 101 |
| Gorilla_gorilla_gorilla-A934_Delphi | Gorilla_gorilla | 27 | 80 |
| Gorilla_gorilla_gorilla-KB6039_Oko | Gorilla_gorilla | 40 | 84 |
| Gorilla_gorilla_gorilla-KB3784_Dolly | Gorilla_gorilla | 25 | 87 |
| Gorilla_gorilla_gorilla-A933_Dian | Gorilla_gorilla | 36 | 81 |

**Figure 10.3 – Size distributions plotted in log-space of CNVs identified among all the great apes assessed for CNV diversity in this study.**

**Diversity of CNPs in great apes:** In order to explore the diversity of great ape copy number variants, we first compared the copy number diversity of each of the populations analyzed to the SNP diversity (Prado and Sudmant, companion under review). Using segregating CNVs, we computed an estimate of Watterson’s θ for segregating CNVs/genome and compared this to Watterson’s theta for SNPs/bp. As expected, the two were highly correlated (r2=0.52, p=0.026; **Figure 10.4**).

**Figure 10.4: Estimates Watterson’s theta (θ) for segregating CNVs/genome plotted versus segregating SNPs/bp shows a strong correlation between the diversity of SNP and CNP diversity (r2 =0.52, p=0.026).**

We next performed a Principle Components Analysis (PCA(Patterson et al. 2006)) using only deletion CNVs that could be assigned a state of 0, 1, or 2 (**Figure 10.5**). All known species’ and subspecies’ relationships and classifications are observed as clusters in the PCAs. Additionally, the relative levels of diversity are captured in the clusterings with more diverse populations, such as the Western gorilla, showing a more dispersed pattern. Sumatran orangutan show more diversity than Bornean orangutan, as suggested by the estimates of θ in both SNPs and CNPs. The PCAs additionally show two clusters in Sumatran orangutans, possibly demonstrating Sumatran orangutan subpopulations. Among human, the first PC discriminates African from non-African populations with the Denisova individual falling intermediate. The Denisova is closest to the Papuan and Asian individuals along PC2, which is interesting as gene flow from Denisovans to Papuan individuals has been reported(Meyer et al. 2012).

**Figure 10.5: PCA plots based on CNV genotypes for chimpanzee, gorilla, and orangutan, respectively. All individual species’ and subspecies’ relationships are confirmed in addition to relative diversity between populations. Western lowland gorillas, for example, show far more diversity than Eastern lowland gorillas. Between orangutan species, the Sumatran orangutans show more diversity and appear to cluster into two groups, potentially a signature of Sumatran orangutan subpopulations.**

We next constructed neighbor-joining trees using the genotypes of fixed and segregating variant calls to compute the hamming distance between all genomes. Species’ trees were first considered using all variants >2 kbp, 3.5 kbp, and 5 kbp, respectively (**Figure 10.6**). As a function of millions of years since divergence, all trees show a significant increase in the number fixed deletions in the chimpanzee-bonobo ancestor (**Section 9**); however, we find there is a marked enrichment in the chimpanzee-bonobo branch for larger events.

**Figure 10.6: Neighbor-joining species trees constructed from segregating variants and fixed variants ≥2 kbp, ≥3.5 kbp and ≥5 kbp (a,b,c), respectively. Though the chimpanzee-bonobo branch shows an increased rate of deletion for each of these size thresholds, the effect is more pronounced for larger deletions.**

We next constructed a neighbor-joining tree for all great ape individuals (**Figure 10.7**). Confidence values on branches are generated from repeatedly randomly subsampling 50% of the variants and re-computing the tree. All known species’ relationships were captured with 100% confidence along with the correct species-tree topology. All the individual subspecies’ topologies were additionally reconstructed with high confidence and were identical to those identified by SNPs with the exception of Eastern chimpanzee, which are placed as an outgroup to all chimpanzee subspecies. Eastern lowland gorillas place as an outgroup to all Western gorillas and the single Cross River gorilla individual as an outgroup to all Western lowland gorillas. Within the chimpanzee phylogeny, the two Nigerian-Cameroon individuals Tobi and Julie cluster together, as observed in the SNP-based tree, and the individuals Yolanda, Andromeda and Vincent, all Eastern chimpanzees from Gombe reserve in Tanzania, cluster together with 100% support. Within the human phylogeny, Africans and non-Africans form two high-confidence clades and the Denisova archaic hominid places as an outgroup to all humans robustly with 92% confidence.

**Figure 10.7: A neighbor-joining tree of great ape individuals constructed from segregating structural variation and fixed deletions >5 kbp. Confidence values on branches are generated from repeatedly randomly subsampling 50% of the variants and re-computing the tree.**

**CNV burden among great ape populations:** Though our per-population sample sizes are small, we attempted to assess the CNV burden among different primate populations by comparing the total load of deletion and duplication events between different populations. Analysis was limited to non-segmentally duplicated regions of the genome and events >30 kbp to limit false positives. We first assessed the relative duplication load of different populations (**Figure 10.8**).

**Figure 10.8: Survival functions of the proportion of individuals with at least a given total base-pair load of duplications plotted by total kbp and by number of sites. Bonobo, Western chimpanzee, and Sumatran orangutan have an increased load of duplications. The human Papuan individual harbors two large private duplications increasing the total kbp load in this individual.**

Bonobo, Western chimpanzee, and Sumatran orangutan all showed a significantly higher burden of duplications compared to human, Eastern chimpanzee, Nigerian-Cameroon chimpanzee, gorilla, and Bornean orangutan (**Table 10.3**). A single human Papuan individual showed an increased duplication load as measured in base pairs as a result of two large private duplications.

**Table 10.3: Statistical significance of the relative base-pair load and the relative site load of duplications between different primate populations.**

| Species 1 | Species 2 | p-value – bp load | p-value # of sites load |
| --- | --- | --- | --- |
| *Bonobos* | *Humans, Eastern chimpanzees, Nigerian-Cameroon chimpanzees, gorillas and Bornean orangutans* | 0.0014 | 0.005 |
| *Sumatran orangutans* | *Humans, Eastern chimpanzees, Nigerian-Cameroon chimpanzees, gorillas and Bornean orangutans* | 0.0088 | 0.014 |
| *Western chimpanzees* | *Humans, Eastern chimpanzees, Nigerian-Cameroon chimpanzees, gorillas and Bornean orangutans* | 0.02 | 0.004 |
| *Bonobos, Sumatran orangutans and Western chimpanzees* | *Humans, Eastern chimpanzees, Nigerian-Cameroon chimpanzees, gorillas and Bornean orangutans* | 8.66e-6 | 3.09e-5 |

We next assessed the relative load of deletions between different populations identifying a significantly increased deletion burden in Western chimpanzees compared to all other primate populations (**Figure 10.9**; p=0.00289, for base-pair load, p=0.04 for site load). One particular Western chimpanzee, Susie-A, harbored a single large ~1.6 Mbp deletion event (**Section 11**). To ensure that this single individual was not driving the significance of the load comparison, we removed her from the analysis and tested the relative load again. Though this left only three Western chimpanzees in the analysis, the result was still significant by base-pair load (p=0.02) though not by number of sites (p=0.055).

**Figure 10.9 Survival functions of the proportion of individuals with at least a given total base-pair load of deletions plotted by total kbp and by number of sites. Western chimpanzees have an increased load of deletions.**

# Section 11: A human genomic disorder identified in a nonhuman primate

One particularly striking structural variant we identified was a ~1.6 Mbp microdeletion on 17p11.2 in the Western chimpanzee Susie-A(chr17:16,658,625-18,271,593)*.* This deletion event encompasses 29 genes, notably including the gene retinoic acid-induced 1 (*RAI1*), deletions of which cause Smith-Magenis syndrome (SMS) in humans, a rare syndrome with an incidence of 1 in 15,000-25,000 human births. SMS is a complex neurobehavioral disorder resulting mental retardation and developmental delay, behavioral abnormalities, and facial and skeletal dismorphologies(Elsea and Girirajan 2008). We validated this event by arrayCGH against the Western chimpanzee Rappa (**Figure 11.1**)*.*

*
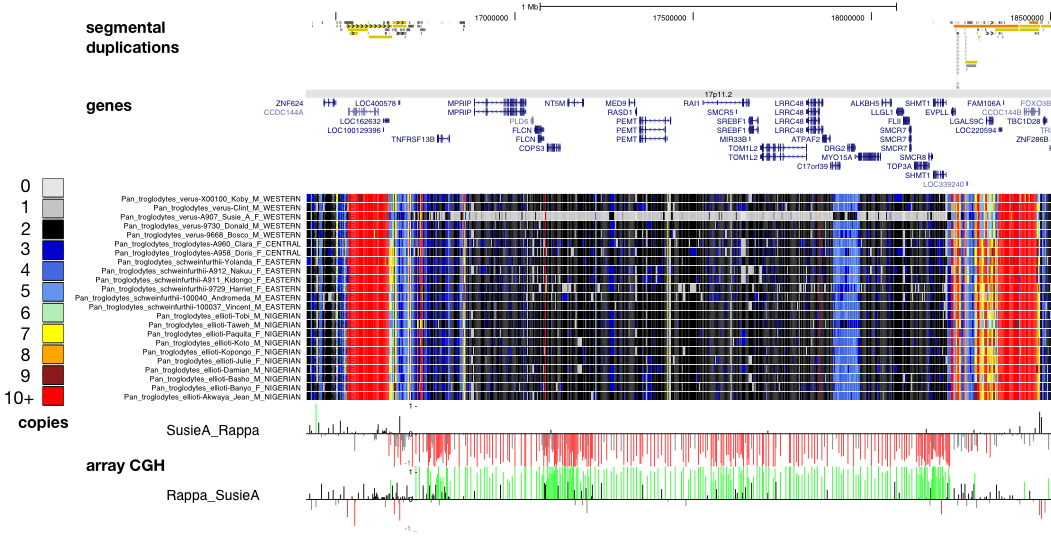
*

**Figure 11.1: A 1.74 Mbp microdeletion on 17p11.2 in the chimpanzee Susie-A. The deletion overlaps 29 genes including *RAI1*; haploinsufficiency in *RAI1* results in SMS in humans, a severe neurobehavioral.**

Though Susie-A, who was captured in 1975, died in 1997, we were able to obtain a report of her clinical features from the records of her handlers and veterinarians. These descriptions bare striking similarity to many of the phenotypes observed in SMS patients **(Table 11.1**); notably, maladaptive behaviors such as aggression and disobedience were identified in Susie-A, who was described a “mean and more aggressive than usual” chimpanzee. Susie-A also presented a hump on her back similar to many SMS patients who exhibit abnormal spinal curvatures, was obese—a common characteristic of SMS patients, and died of interstitial nephritis. Renal abnormalities are common in SMS patients. Finally, Susie-A exhibited tracheitis and had grossly overlapping tracheal cartilage ends, which contributed to noted breathing noises she would make; 50-75% of SMS patients exhibit tracheobronchial problems and velopharyngeal insufficiency.

**Table 11.1: Common clinical features of SMS and related features of Susie-A.**

| **Clinical features of Smith-Magenis syndrome** | **Related clinical features of Susie-A** |
| --- | --- |
| Maladaptive behavioral issues including:   - Frequent outbursts and tantrums - Aggression - Disobedience - Emotional volatility - Tendency toward attention-seeking behaviors - Lack of respect for personal space during conversation. | Susie-A is described as having exhibiting   - ‘marked impairment in her behavioral skills,’ - ‘mean and more aggressive than usual’ behavior - When in the close proximity to people Susie-A would palpate her vagina, which is known to be a challenging “culturally abnormal” sexualized behavior in chimpanzees. |
| Abnormal curvature of the spine and scoliosis are present in 50-75% of individuals with SMS(Greenberg et al. 1996; Pagon et al. 1993). | Susie-A had kyphoscoliosis as a result of abnormal spine curvature. |
| Edelman *et al*(Edelman et al. 2007) found that individuals with *RAI1* mutations and deletions were likely to be obese. Mouse models of *RAI1* deletions additionally demonstrated an obese phenotype for deletions but not duplications of the critical locus(Walz et al. 2003; Yan et al. 2004); duplications conferred an underweight phenotype. A null *RAI1* allele in mice generated by Bi *et al*(Bi et al. 2005) also exhibited obesity. | Susie-A was an obese chimp with a body weight of ~90 kg. The normal body weight of a mature chimpanzee is between 50 kbp and 65 kg and less for female Western chimpanzees. |
| >75% of SMS patients exhibit otolaryngologic abnormalities including a hoarse, deep voice and 50-75% exhibit tracheobronchial problems and velopharyngeal insufficiency(Pagon et al. 1993). | Susie-A exhibited tracheitis and had grossly overlapping tracheal cartilage ends, which are suspected to contribute to documented breathing noises she would make. |
| Renal abnormalities have been shown to occur in 20-35% of SMS patients(Greenberg et al. 1996; Pagon et al. 1993). Additionally, 25%-50% of SMS patients have been found to have cardiac abnormalities. | Susie-A died of chronic interstitial nephritis and was found to have increased creatinine and leukocytosis consistent with renal failure. Numerous eosinophils were found in her gastrointestinal tract with no detection of parasites. Obesity and tracheitis presumably played a role in her final cardiorespiratory failure as well. |


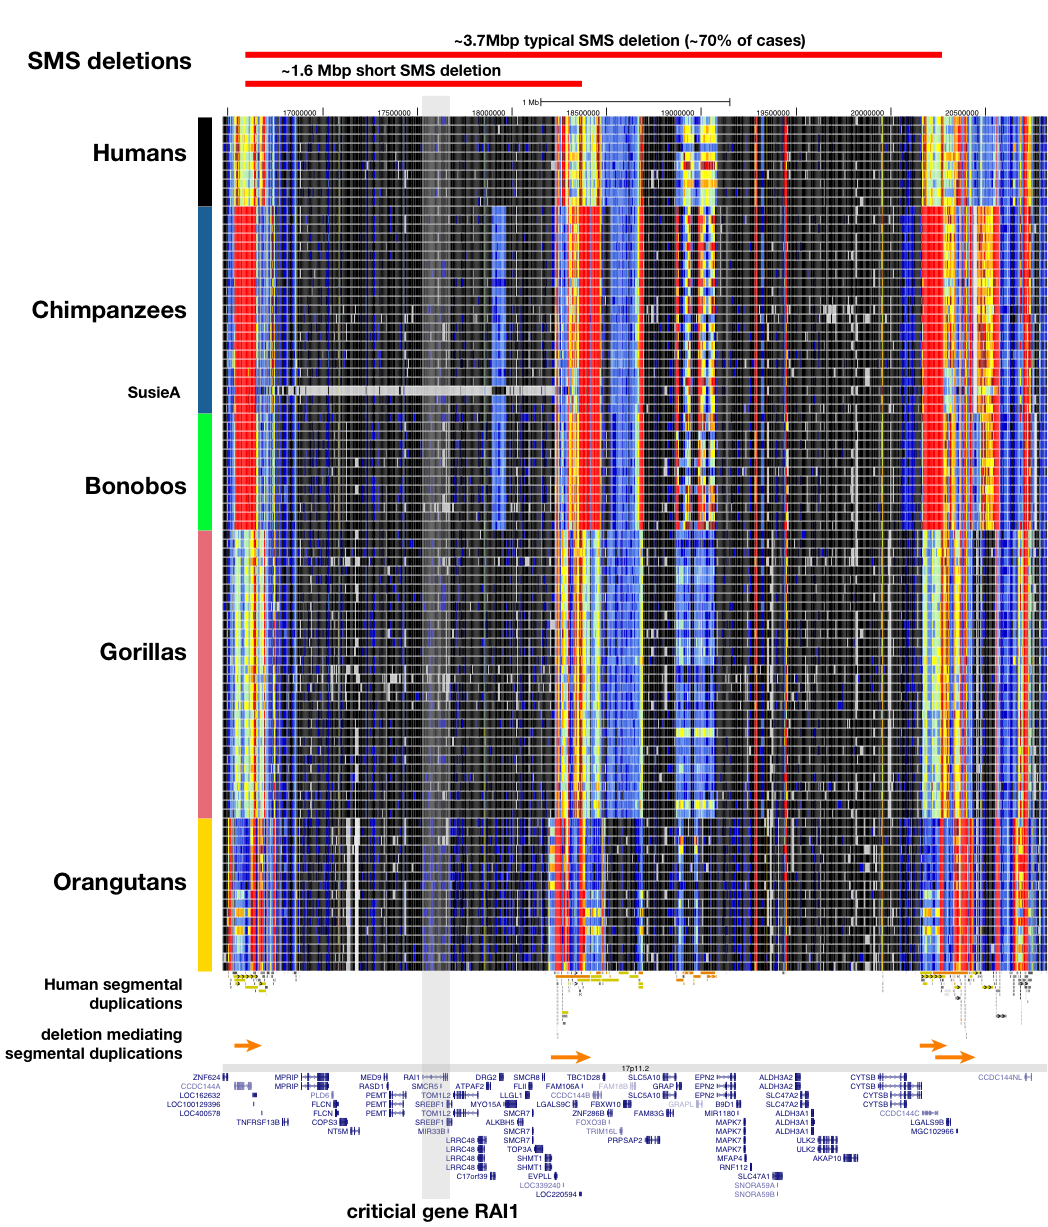


**Figure 11.2: Architecture of the SMS/PTLS locus 17q11.2 in great apes. In humans, SDs in direct orientation mediate two different deletions sharing a distal breakpoint, both of which delete the critical gene *RAI1*. Susie-A exhibits the rarer of the two deletions.**

SMS is caused by haploinsufficiency of *RAI1*, which is most often the result of a ~3.7 Mbp deletion mediated by two highly homologous SDs (~70% of cases(Elsea and Girirajan 2008)). Atypical deletions encompassing *RAI1* and *RAI1* mutations are responsible for an additional fraction of cases. The event we identify in Susie-A is much smaller than the typical human deletion (**Figure 11.2**). Notably, the SDs of the 17p11.2 locus have increased in copy number specifically in the *Pan* genus (**Figure 11.3, Figure 11.4**), perhaps modifying the architecture of bonobo and chimpanzee SDs to predispose to this smaller deletion event.

**Figure 11.4: Copy number of the H duplicon at 17p11.2 is shown for different individuals clustered by great ape species. Chimpanzees and bonobos have increased copy number of the duplication ranging from 6-8 copies, with the exception of Suzie-A who has lost a copy. Humans exhibit 4 copies of the region.**

**Figure 11.4: Copy number of the H duplicon, which is lost in Susie-A, genotyped across 675 individuals. 100% of humans robustly show 4 copies of this duplication.**

To resolve the architecture of the chimpanzee 17p11.2 locus, we turned to large-insert clone sequencing. We began by searching for chimpanzee BACs that mapped to the SDs of the SMS region in 17p11.2 of HG18 to determine the structure of SDs present in that region. We identified 37 such BACs that mapped to this locus and were annotated as mapping to chromosome 17 or unknown. Two of these BACs had previously been Sanger sequenced and we sequenced the remaining clones using a PacBio RS system, successfully assembling 20 more nonredundant clones (**Table 11.2**). To determine true anchor positions for each BAC, we ran whole-genome shotgun sequence detection (WSSD(Bailey et al. 2002)) of duplication content in BACs using human, chimpanzee, gorilla, and orangutan reads and determined regions in BACs with no coverage by WSSD in any species. We searched HG18 with these unique regions to find the highest identity location and considered these positions the “anchor” for each BAC. We were able to anchor 13 BACs in this manner. Aligning BACs to each other, we were then able to construct three super-contigs from seven BACs. Finally, we used DupMasker(Jiang et al. 2008) to determine the content of the duplication blocks in humans and chimpanzees and aligned our contigs to both the human and chimpanzee reference genomes to assess the differences in content and structure (**Figure 11.5**). BACs that we could not anchor with 100% certainty were placed to their most likely location given their structure and content in the context of Susie-A’s deletion.

**Table 11.2 : Sequenced BACs assessed and sequencing technology used.**

| | Clone name | Source | | --- | --- | | CH251-545A24 (AC183294.3) | Sanger | | CH251-59G18 | PacBio | | CH251-60C22 (AC183837.3) | Sanger | | CH251-21N5 | PacBio | | CH251-182P19 | PacBio | | CH251-425F18 | PacBio | | CH251-33G11 | PacBio | | CH251-179D15 | PacBio | | CH251-133B4 | PacBio | | CH251-200P13 | PacBio | | CH251-433E19 | PacBio | | | Clone name | Source | | --- | --- | | CH251-35C10 | PacBio | | CH251-48B19 | PacBio | | CH251-354I21 | PacBio | | CH251-118C16 | PacBio | | CH251-13D21 | PacBio | | CH251-173I3 | PacBio | | CH251-184C19 | PacBio | | CH251-18I21 | PacBio | | CH251-251H7 | PacBio | | CH251-30P23 | PacBio | | CH251-75B17 | PacBio | |
| --- | --- | --- | --- | --- | --- | --- | --- | --- | --- | --- | --- | --- | --- | --- | --- | --- | --- | --- | --- | --- | --- | --- | --- | --- | --- | --- | --- | --- | --- | --- | --- | --- | --- | --- | --- | --- | --- | --- | --- | --- | --- | --- | --- | --- | --- | --- | --- | --- | --- |

**Table 11.3: Summary of BACs used to resolve the architecture of the SMS region in chimpanzees. Clone information is grouped by sequencing technology (PacBio and Sanger). PacBio clones were sequenced and assembled in-house; Sanger clones were sequenced at The Genome Institute at Washington University.**

| Clone assembly | Number | Size (bp) | Unique by WSSD (bp) | Discontiguous wrt HG18 (bp) | Contiguous and inverted wrt HG18 (bp) | Collapsed duplications in assembly (bp) |
| --- | --- | --- | --- | --- | --- | --- |
| PacBio | 20 | 2,935,821 | 2,181,309 | 1,194,224 | 71,582 | 268,000 |
| Sanger | 2 | 413,710 | 95,750 | 219,862 | 0 | N/A |
| Total | 22 | 3,349,531 | 2,277,059 | 1,414,086 | 71,582 | 268,000 |

**
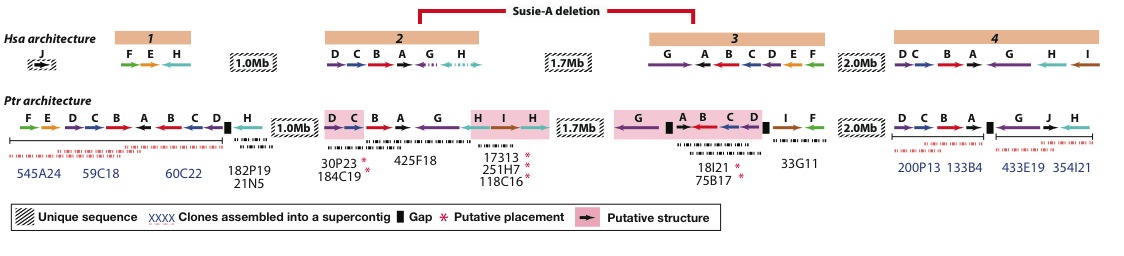
**

**Figure 11.5: Duplicon structure of the human and chimpanzee 17p11.2 locus. Duplication blocks are labeled 1-4 and annotated with the underlying structure of SDs. We hypothesize that the directly oriented G-duplicon in chimpanzees is responsible for mediating the Susie-A deletion.**

# Section 12: References

1000 Genomes Project Consortium, Abecasis GR, Auton A, Brooks LD, DePristo MA, Durbin RM, Handsaker RE, Kang HM, Marth GT, McVean GA. 2012. An integrated map of genetic variation from 1,092 human genomes. *Nature* **491**: 56–65.

Alkan C, Kidd JM, Marques-Bonet T, Aksay G, Antonacci F, Hormozdiari F, Kitzman JO, Baker C, Malig M, Mutlu O, et al. 2009. Personalized copy number and segmental duplication maps using next-generation sequencing. *Nat Genet* **41**: 1061–1067.

Altschul SF, Gish W, Miller W, Myers EW, Lipman DJ. 1990. Basic local alignment search tool. *J Mol Biol* **215**: 403–410.

Bailey JA, Gu Z, Clark RA, Reinert K, Samonte RV, Schwartz S, Adams MD, Myers EW, Li PW, Eichler EE. 2002. Recent segmental duplications in the human genome. *Science* **297**: 1003–1007.

Benson G. 1999. Tandem repeats finder: a program to analyze DNA sequences. *Nucleic Acids Res* **27**: 573–580.

Bi W, Ohyama T, Nakamura H, Yan J, Visvanathan J, Justice MJ, Lupski JR. 2005. Inactivation of Rai1 in mice recapitulates phenotypes observed in chromosome engineered mouse models for Smith-Magenis syndrome. *Hum Mol Genet* **14**: 983–995.

Brawand D, Soumillon M, Necsulea A, Julien P, Csárdi G, Harrigan P, Weier M, Liechti A, Aximu-Petri A, Kircher M, et al. 2011. The evolution of gene expression levels in mammalian organs. *Nature* **478**: 343–348.

Cheng Z, Ventura M, She X, Khaitovich P, Graves T, Osoegawa K, Church D, DeJong P, Wilson RK, Pääbo S, et al. 2005. A genome-wide comparison of recent chimpanzee and human segmental duplications. *Nature* **437**: 88–93.

Chimpanzee Sequencing and Analysis Consortium. 2005. Initial sequence of the chimpanzee genome and comparison with the human genome. *Nature* **437**: 69–87.

Conrad DF, Pinto D, Redon R, Feuk L, Gokcumen O, Zhang Y, Aerts J, Andrews TD, Barnes C, Campbell P, et al. 2010. Origins and functional impact of copy number variation in the human genome. *Nature* **464**: 704–712.

Cooper GM, Coe BP, Girirajan S, Rosenfeld JA, Vu TH, Baker C, Williams C, Stalker H, Hamid R, Hannig V, et al. 2011. A copy number variation morbidity map of developmental delay. *Nat Genet* **43**: 838–846.

Edelman EA, Girirajan S, Finucane B, Patel PI, Lupski JR, Smith ACM, Elsea SH. 2007. Gender, genotype, and phenotype differences in Smith-Magenis syndrome: a meta-analysis of 105 cases. *Clin Genet* **71**: 540–550.

Elsea SH, Girirajan S. 2008. Smith–Magenis syndrome. *Eur J Hum Genet* **16**: 412–421.

Emerson JJ, Cardoso-Moreira M, Borevitz JO, Long M. 2008. Natural selection shapes genome-wide patterns of copy-number polymorphism in Drosophila melanogaster. *Science* **320**: 1629–1631.

Greenberg F, Lewis RA, Potocki L, Glaze D, Parke J, Killian J, Murphy MA, Williamson D, Brown F, Dutton R, et al. 1996. Multi-disciplinary clinical study of Smith-Magenis syndrome (deletion 17p11.2). *Am J Med Genet* **62**: 247–254.

Hach F, Hormozdiari F, Alkan C, Hormozdiari F, Birol I, Eichler EE, Sahinalp SC. 2010. mrsFAST: a cache-oblivious algorithm for short-read mapping. *Nat Methods* **7**: 576–577.

Hormozdiari F, Alkan C, Eichler EE, Sahinalp SC. 2009. Combinatorial algorithms for structural variation detection in high-throughput sequenced genomes. *Genome Res* **19**: 1270–1278.

Jiang Z, Hubley R, Smit A, Eichler EE. 2008. DupMasker: a tool for annotating primate segmental duplications. *Genome Res* **18**: 1362–1368.

Kent WJ. 2002. BLAT--the BLAST-like alignment tool. *Genome Res* **12**: 656–664.

Langergraber KE, Prüfer K, Rowney C, Boesch C, Crockford C, Fawcett K, Inoue E, Inoue-Muruyama M, Mitani JC, Muller MN, et al. 2012. Generation times in wild chimpanzees and gorillas suggest earlier divergence times in great ape and human evolution. *Proc Natl Acad Sci USA* **109**: 15716–15721.

Langmead B, Salzberg SL. 2012. Fast gapped-read alignment with Bowtie 2. *Nat Methods* **9**: 357–359.

Lichter P, Tang CJ, Call K, Hermanson G, Evans GA, Housman D, Ward DC. 1990. High-resolution mapping of human chromosome 11 by in situ hybridization with cosmid clones. *Science* **247**: 64–69.

Locke DP, Hillier LW, Warren WC, Worley KC, Nazareth LV, Muzny DM, Yang S-P, Wang Z, Chinwalla AT, Minx P, et al. 2011. Comparative and demographic analysis of orang-utan genomes. *Nature* **469**: 529–533.

Marques-Bonet T, Kidd JM, Ventura M, Graves TA, Cheng Z, Hillier LW, Jiang Z, Baker C, Malfavon-Borja R, Fulton LA, et al. 2009. A burst of segmental duplications in the genome of the African great ape ancestor. *Nature* **457**: 877–881.

McLean CY, Reno PL, Pollen AA, Bassan AI, Capellini TD, Guenther C, Indjeian VB, Lim X, Menke DB, Schaar BT, et al. 2011. Human-specific loss of regulatory DNA and the evolution of human-specific traits. *Nature* **471**: 216–219.

Meyer M, Kircher M, Gansauge M-T, Li H, Racimo F, Mallick S, Schraiber JG, Jay F, Prüfer K, de Filippo C, et al. 2012. A High-Coverage Genome Sequence from an Archaic Denisovan Individual. *Science* **338**: 222–226. http://eutils.ncbi.nlm.nih.gov/entrez/eutils/elink.fcgi?dbfrom=pubmed&id=22936568&retmode=ref&cmd=prlinks.

Miller DT, Nasir R, Sobeih MM, Shen Y, Wu B-L, Hanson E. 1993. *16p11.2 Microdeletion - GeneReviews*. University of Washington, Seattle, Seattle (WA) http://www.ncbi.nlm.nih.gov/books/NBK11167/.

Olson MV. 1999. When less is more: gene loss as an engine of evolutionary change. *Am J Hum Genet* **64**: 18–23.

Pagon RA, Bird TD, Dolan CR, Stephens K, Adam MP, Smith AC, Boyd KE, Elsea SH, Finucane BM, Haas-Givler B, et al. 1993. *Smith-Magenis Syndrome*. University of Washington, Seattle, Seattle (WA).

Patterson N, Price AL, Reich D. 2006. Population structure and eigenanalysis. *PLoS Genet* **2**: e190.

Scally A, Dutheil JY, Hillier LW, Jordan GE, Goodhead I, Herrero J, Hobolth A, Lappalainen T, Mailund T, Marques-Bonet T, et al. 2012. Insights into hominid evolution from the gorilla genome sequence. *Nature* **483**: 169–175.

Siepel A, Bejerano G, Pedersen JS, Hinrichs AS, Hou M, Rosenbloom K, Clawson H, Spieth J, Hillier LW, Richards S, et al. 2005. Evolutionarily conserved elements in vertebrate, insect, worm, and yeast genomes. *Genome Res* **15**: 1034–1050.

Sudmant PH, Kitzman JO, Antonacci F, Alkan C, Malig M, Tsalenko A, Sampas N, Bruhn L, Shendure J, 1000 Genomes Project, et al. 2010. Diversity of human copy number variation and multicopy genes. *Science* **330**: 641–646.

Sun JX, Helgason A, Masson G, Ebenesersdóttir SS, Li H, Mallick S, Gnerre S, Patterson N, Kong A, Reich D, et al. 2012. A direct characterization of human mutation based on microsatellites. *Nat Genet* **44**: 1161–1165.

Trapnell C, Roberts A, Goff L, Pertea G, Kim D, Kelley DR, Pimentel H, Salzberg SL, Rinn JL, Pachter L. 2012. Differential gene and transcript expression analysis of RNA-seq experiments with TopHat and Cufflinks. *Nat Protoc* **7**: 562–578.

Varki A, Geschwind DH, Eichler EE. 2008. Explaining human uniqueness: genome interactions with environment, behaviour and culture. *Nat Rev Genet* **9**: 749–763.

Ventura M, Catacchio CR, Alkan C, Marques-Bonet T, Sajjadian S, Graves TA, Hormozdiari F, Navarro A, Malig M, Baker C, et al. 2011. Gorilla genome structural variation reveals evolutionary parallelisms with chimpanzee. *Genome Res* **21**: 1640–1649.

Walz K, Caratini-Rivera S, Bi W, Fonseca P, Mansouri DL, Lynch J, Vogel H, Noebels JL, Bradley A, Lupski JR. 2003. Modeling del(17)(p11.2p11.2) and dup(17)(p11.2p11.2) contiguous gene syndromes by chromosome engineering in mice: phenotypic consequences of gene dosage imbalance. *Mol Cell Biol* **23**: 3646–3655.

Witkin A. 1984. Scale-space filtering: A new approach to multi-scale description. **9**: 150–153.

Yan J, Keener VW, Bi W, Walz K, Bradley A, Justice MJ, Lupski JR. 2004. Reduced penetrance of craniofacial anomalies as a function of deletion size and genetic background in a chromosome engineered partial mouse model for Smith-Magenis syndrome. *Hum Mol Genet* **13**: 2613–2624.
