# Supplementary material for: Evolution and diversity of copy number variation in the great ape lineage
Source: HighWire-hosted journal article supplement (doi:10.1101/gr.158543.113), 2013-07-03
Supplement: Supplemental_Tables.xlsx [file Supplemental_Tables.xlsx]

## Sheet: S1 - Sample origins
Table S1. Summary of the great ape samples assessed in the Great Ape Genome Project - adapted from Prado-Martinez and Sudmant et al, Nature 2013: The coverage, sequencing center, geographic origin (when known), read length and sex of individuals is reported in this table. Nigeria-Cameroon chimpanzees origins are estimated as reported in Ghobrial et al. (2010). Gashaka Gumti National Park is in ea…
Species	Common name	Name	Studbook ID	ID2	Sex	Source	Geographic origin	Birth Origin	Sequencing Center	Read Length	Sequenced Coverage	Sequenced Coverage PE	Sequenced Gbp	Comments
Gorilla beringei graueri	Eastern lowland gorilla	M'kubwa	9907	9732 10-0029	M	Primary fibroblast	DRC - Tulakwa, Northwest of Bukavu	Wild born	WashU	100	18.928	18.9	56.785
Gorilla beringei graueri	Eastern lowland gorilla	Kaisi	9909	A929	M	Blood	DRC - Walikale region, Nord-Kivu	Wild born	CNAG	100/101	41.3	34.6	124
Gorilla beringei graueri	Eastern lowland gorilla	Victoria	9919	A967	F	Heparine blood	DRC	Captive born	CNAG	53/100	36.7	36.7	110.2	1st Generation by 9908 and 9917
Gorilla gorilla diehli	Cross River gorilla	Nyango	9941	B646	F	Whole Blood	West Africa (Cameroon)	Wild born	CNAG	100	23.8	23.8	71.4
Gorilla gorilla gorilla	Western lowland gorilla	Kowali	663	9749 06-0127	F	Blood		Captive born	WashU	100	20.389	20.4	61.167	Frank*Kumba(Kisoro*/Mumbi*)
Gorilla gorilla gorilla	Western lowland gorilla	Bulera	1120	9751 08-0056	F	Blood	Cameroon All	Captive born	WashU	100	20.519	20.5	61.558	Otto*/Benga(Kisoro*/Helen*)
Gorilla gorilla gorilla	Western lowland gorilla	Azizi	1459	9750 08-0059	M	Blood	Cameroon (One parent from Victoria, Cameroon)	Captive born	WashU	100	20.528	20.5	61.524	Memba*/Alvila(Albert*Vila*)
Gorilla gorilla gorilla	Western lowland gorilla	Suzie	636	9752 08-0060	F	Blood		Wild born	WashU	100	20.6	20.6	61.936
Gorilla gorilla gorilla	Western lowland gorilla	Kokamo	1049	9753 10-0010(1)	F	Blood		Captive born	WashU	100	16.387	16.4	49.164	Parents: Moeba*/Kathryn*
Gorilla gorilla gorilla	Western lowland gorilla	Banjo	255	A931	M	Blood	Cameroon	Wild born	CNAG	100	31.3	31.3	93.8
Gorilla gorilla gorilla	Western lowland gorilla	Mimi	241	A932	F	Blood	Cameroon	Wild born	CNAG	100/101	38.7	32.1	116
Gorilla gorilla gorilla	Western lowland gorilla	Dian	1091	A933	F	Blood	Cameroon	Captive born	CNAG	100	42.1	35.2	126.2	1st Generation by 856 and 858, both Wild born Cameroon?
Gorilla gorilla gorilla	Western lowland gorilla	Delphi	230	A934	F	Blood	Congo	Wild born	CNAG	100	40.1289	40.1	120.387	Congo (could be both DRC and PRC, as Congo was one nation at that time)
Gorilla gorilla gorilla	Western lowland gorilla	Sandra	969	A930	F	Blood	Cameroon	Captive born	CNAG	100	27.6774	27.7	83.0322	1st Generation by 566 and 530 both wild born Cameroon
Gorilla gorilla gorilla	Western lowland gorilla	Coco	1351	A936	F	Blood	Equatorial Guinea	Wild born	CNAG	100	29.7	29.7	89.2	Equatorial Guinea. She was confiscated by Spanish customs when arriving from Equatorial Guinea.
Gorilla gorilla gorilla	Western lowland gorilla	Kolo	936	A937	F	Blood	Cameroon	Captive born	CNAG	100	31	31	93	1st Generation by 562 and 595 both wild born Cameroon
Gorilla gorilla gorilla	Western lowland gorilla	Amani	899	A962	F	Blood	Captive born	Captive born	CNAG	100	39.2	39.2	117.6	1st Generation by 475 and 476
Gorilla gorilla gorilla	Western lowland gorilla	Abe	52	X00108	M		Unknown	Wild born	CNAG	100	21.1834	21.2	63.5502
Gorilla gorilla gorilla	Western lowland gorilla	Tzambo	440	X00109	M		Unknown	Wild born	CNAG	100	22.4641	22.5	67.3922
Gorilla gorilla gorilla	Western lowland gorilla	Akiba Beri	1926	B642	F	Whole Blood	Cameroon	Wild born	CNAG	100	22.8	22.8	68.3
Gorilla gorilla gorilla	Western lowland gorilla	Choomba	180	B643	F	Whole Blood	West Africa	Wild born	CNAG	100	25.4	25.4	76.3
Gorilla gorilla gorilla	Western lowland gorilla	Paki	191	B644	F	Whole Blood	West Africa	Wild born	CNAG	100	24.9	24.9	74.6
Gorilla gorilla gorilla	Western lowland gorilla	Anthal	1930	B647	F	Whole Blood	West Africa (Cameroon)	Wild born	CNAG	100	23.4	23.4	70.2
Gorilla gorilla gorilla	Western lowland gorilla	Katie	498	B650	F	Whole Blood	West Africa	Wild born	CNAG	100	22.2	22.2	66.7
Gorilla gorilla gorilla	Western lowland gorilla	Carolyn	3	KB5792	F		Congo	Wild born	Stanford	101	12.7	12.7	38.1
Gorilla gorilla gorilla	Western lowland gorilla	Porta	64	KB7973	F		Unknown	Wild born	Stanford	101	13	13	39
Gorilla gorilla gorilla	Western lowland gorilla	Vila	80	KB3782	F		Congo	Wild born	Stanford	101	13.2	13.2	39.7
Gorilla gorilla gorilla	Western lowland gorilla	Helen	96	KB5852	F		Cameroon	Wild born	Stanford	101	15.6	15.6	46.9
Gorilla gorilla gorilla	Western lowland gorilla	Oko	192	KB6039	F		Unknown	Wild born	Stanford	101	16.4	16.4	49.1
Gorilla gorilla gorilla	Western lowland gorilla	Dolly	195	KB3784	F		Congo	Wild born	Stanford	101	17.5	17.5	52.4
Gorilla gorilla gorilla	Western lowland gorilla	Katie	498	KB4986	F		Unknown	Wild born	Stanford	101	15.7	15.7	47
Homo sapiens	Human	Dai	HGDP01307	HGDP01307	M	Lymphoblastoid			WashU	94x100	14.85	14.85	44.54
Homo sapiens	Human	French	HGDP00521	HGDP00521	M	Lymphoblastoid			WashU	94x100	16.66	16.66	49.99
Homo sapiens	Human	Han	HGDP00778	HGDP00778	M	Lymphoblastoid			WashU	94x100	16.56	16.56	49.67
Homo sapiens	Human	Karitiana	HGDP00998	HGDP00998	M	Lymphoblastoid			WashU	94x100	14.97	14.97	44.9
Homo sapiens	Human	Mandenka	HGDP01284	HGDP01284	M	Lymphoblastoid			WashU	94x100	16.07	16.07	48.21
Homo sapiens	Human	Mbuti	HGDP00456	HGDP00456	M	Lymphoblastoid			WashU	94x100	14.39	14.39	43.16
Homo sapiens	Human	Papuan	HGDP00542	HGDP00542	M	Lymphoblastoid			WashU	94x100	14.71	14.71	44.13
Homo sapiens	Human	San	HGDP01029	HGDP01029	M	Lymphoblastoid			WashU	94x100	16.42	16.42	49.25
Homo sapiens	Human	Sardinian	HGDP00665	HGDP00665	M	Lymphoblastoid			WashU	94x100	15.91	15.91	47.72
Pan paniscus	Bonobo	LB502	LB502	05-0096	F	Lymphoblastoid		Captive born	WashU	100	11.98	12	35.942
Pan paniscus	Bonobo	Hortense	91	A914	F	Blood		Wild born	CNAG	100	41.6592	41.7	124.978
Pan paniscus	Bonobo	Kosana	166	A915	F	Blood		Wild born	CNAG	100	43.0574	43.1	129.172
Pan paniscus	Bonobo	Dzeeta	67	A917	F	Blood		Wild born	CNAG	100	48.1492	48.1	144.448
Pan paniscus	Bonobo	Hermien	88	A918	F	Blood		Wild born	CNAG	100	44.8707	44.9	134.612
Pan paniscus	Bonobo	Desmond	57	A919	M	Blood		Wild born	CNAG	100	46.5044	46.5	139.513
Pan paniscus	Bonobo	Catherine	55	A922	F	Blood		Wild born	CNAG	100	33.1828	33.2	99.5483
Pan paniscus	Bonobo	Kombote	56	A923	F	Blood		Wild born	CNAG	100/151	39.4	32.6	118.2
Pan paniscus	Bonobo	Chipita	220	A924	F	Blood		Wild born	CNAG	100	29.6	29.6	88.9
Pan paniscus	Bonobo	Bono	102	A925	M	Blood		Wild born	CNAG	100/151	38.8	32.1	116.3
Pan paniscus	Bonobo	Natalie	46	A926	F	Blood		Wild born	CNAG	100/151	39.7	33.1	119.1
Pan paniscus	Bonobo	Salonga	52	A927	F	Blood		Captive born	CNAG	100	28.7	28.7	86.1	1. Gen by 31 and 15 both wild born
Pan paniscus	Bonobo	Kumbuka	260	A928	F	Blood		Captive born	CNAG	100/101	43.2	36.3	129.5	1. Gen by 1004 and 1006 both wild born
Pan troglodytes ellioti	Nigerian chimpanzee	Akwaya-Jean	LWC2	LWC2	M	Whole Blood	Western Cameroon; conf (Akwaya, Adamoua Province)	Wild born	Seattle	51/100	25.9	25.9	77.8
Pan troglodytes ellioti	Nigerian chimpanzee	Banyo	LWC7	LWC7	F	Whole Blood	Western Cameroon; conf (Bankim, Adamoua Province)	Wild born	Seattle	51	7.4	7.4	22.1
Pan troglodytes ellioti	Nigerian chimpanzee	Basho	LWC8	LWC8	M	Whole Blood	Western Cameroon; conf (Takamanda, SW Province)	Wild born	Seattle	51	11.2	11.2	33.5
Pan troglodytes ellioti	Nigerian chimpanzee	Damian	LWC12	LWC12	M	Whole Blood	Western Cameroon; conf (Tinto, NW Province)	Wild born	Seattle	51/100	22.9	22.9	68.7
Pan troglodytes ellioti	Nigerian chimpanzee	Julie	LWC21	LWC21	F	Whole Blood	Western Cameroon; conf (Douala, Littoral Province probably smuggled from NW)	Wild born	Seattle	50/100	26.1	26.1	78.2
Pan troglodytes ellioti	Nigerian chimpanzee	Kopongo	LWC23	LWC23	F	Whole Blood	Western Cameroon; conf (Mt. Cameroon, SW Province)	Wild born	Seattle	51	9.4	9.4	28.2
Pan troglodytes ellioti	Nigerian chimpanzee	Koto	LWC24	LWC24	M	Whole Blood	Western Cameroon; conf (Edea, Littoral Province probably smuggled from Mt. Cameroon)	Wild born	Seattle	50/100	27.3	27.3	81.8
Pan troglodytes ellioti	Nigerian chimpanzee	Paquita	LWC038	LWC038	F	Whole Blood	Western Cameroon; conf (Bertoua, Eastern Province)	Wild born	Seattle	51	10.4	10.4	31.2
Pan troglodytes ellioti	Nigerian chimpanzee	Taweh	LWC43	LWC43	M*	Whole Blood	Western Cameroon; conf (Numba Nfe near Mamfe, SW Province)	Wild born	Seattle	50/100	23.7	23.7	71
Pan troglodytes ellioti	Nigerian chimpanzee	Tobi	LWC046	LWC046	F	Whole Blood	Western Cameroon; conf (Yaounde--long term resdent of Yaounde Zoo)	Wild born	Seattle	51	11.5	11.5	34.4
Pan troglodytes schweinfurthii	Eastern chimpanzee	Vincent	Ch-045	100037	M	Spleen	Tanzania, Gombe National Park	Wild born	CNAG	100	25.0125	25.0125	75.0374
Pan troglodytes schweinfurthii	Eastern chimpanzee	Andromeda	BB-042a	100040	F	Spleen	Tanzania, Gombe National Park	Wild born	CNAG	100	23.1797	23.2	69.539
Pan troglodytes schweinfurthii	Eastern chimpanzee	Harriet	ISIS #925	9729 10-0005	F	Spleen	Bundongo Forest up Banyoror, Western Uganda	Wild born	WashU	100	13.647	13.6	40.941
Pan troglodytes schweinfurthii	Eastern chimpanzee	Bwambale	N/A	A910	M	Blood	Uganda, from Busamba, Bundibujo District in western Uganda.	Wild born	CNAG	100	48.2638	48.3	144.791
Pan troglodytes schweinfurthii	Eastern chimpanzee	Kidongo	N/A	A911	F	Blood	Democratic Republic of Congo	Wild born	CNAG	100	49.8106	49.8	149.432
Pan troglodytes schweinfurthii	Eastern chimpanzee	Nakuu	N/A	A912	F	Blood	Democratic Republic of Congo	Wild born	CNAG	100	46.3618	46.4	139.086
Pan troglodytes troglodytes	Central chimpanzee	Vaillant	N/A	A957	M	Blood	Gabon (Haut Ogooué)	Wild born	CNAG	100	34.9849	35	104.955
Pan troglodytes troglodytes	Central chimpanzee	Doris	N/A	A958	F	Blood	Gabon (Ogooué Maritime)	Wild born	CNAG	100	39.4	39.4	118.2
Pan troglodytes troglodytes	Central chimpanzee	Julie	10306?	A959	F	Blood	Gabon (Haut Ogooué)	Wild born	CNAG	100	29.6634	29.7	88.9902
Pan troglodytes troglodytes	Central chimpanzee	Clara	N/A	A960	F	Blood	Gabon	Wild born	CNAG	100	25.6297	25.6	76.8891
Pan troglodytes verus	Western chimpanzee	Bosco	215?	9668 10-0004	M	Liver		Wild born	WashU	100	17.764	17.8	53.291
Pan troglodytes verus	Western chimpanzee	Jimmie	10784	A956	F	Blood	Western Africa	Wild born	CNAG	100	31.7159	31.7	95.1478
Pan troglodytes verus	Western chimpanzee	Koby	650?	X00100	M			Wild born	CNAG	100	20.4838	20.5	61.4514
Pan troglodytes verus	Western chimpanzee	Clint	C0471	C0471	M		Captive born	Captive born	WashU	100	39.3	39.3	118
Pan troglodytes verus/troglodytes	Chimpanzee hybrid	Donald	C0551	09-0049	M	Blood		Captive born	WashU	100	21.731	21.7	65.191	Dam: West Africa Sire: Unknown
Pongo abelii	Sumatran orangutan	Elsi	446	A947	F	Blood	Sumatra	Wild born	CNAG	100	39.8	39.8	119.3
Pongo abelii	Sumatran orangutan	Kiki	154	A948	F	Blood	Sumatra	Wild born	CNAG	100	34.1	34.1	102.3
Pongo abelii	Sumatran orangutan	Dunja	1302	A949	F	Blood		Captive born	CNAG	100	41.1301	41.1	123.39	1. Gen by 456 and 457 both wild born Sumatra
Pongo abelii	Sumatran orangutan	Babu	511	A950	F	Blood	Sumatra	Wild born	CNAG		40.5776	40.6	121.733
Pongo abelii	Sumatran orangutan	Buschi	498	A952	M	Blood	Sumatra	Wild born	CNAG	100	35.2138	35.2	105.641
Pongo pygmaeus	Bornean orangutan	Nonja	1581	A939	F	Blood		Captive born	CNAG	100	32.6	32.6	97.9	1. Gen by 1052 and 1012 both from Sarawak Borneo
Pongo pygmaeus	Bornean orangutan	Temmy	1852	A940	F	Blood		Captive born	CNAG	100	29.2	29.2	87.5	1. Gen by 793 and 794 both wild born Borneo
Pongo pygmaeus	Bornean orangutan	Sari	1097	A941	F	Blood		Captive born	CNAG	100	32.3	32.3	97	1. Gen by 202 and 322 both wild born Borneo
Pongo pygmaeus	Bornean orangutan	Tilda	1452	A943	F	Blood	Borneo	Wild born	CNAG	100	37.7	37.7	113.2
Pongo pygmaeus	Bornean orangutan	Napoleon	898	A944	M	Blood	Borneo	Wild born	CNAG	100	36.8	36.8	110.4

## Sheet: S2 - fixed deletions
Table S2 - lineage specific fixed deletions identified against the human reference genome Build 36
region	lineage	length	genes	Pan_troglodytes_verus-9668_Bosco	Pongo_abelii-A949_Dunja	Gorilla_gorilla_gorilla-A962_Amani	Gorilla_gorilla_gorilla-Snowflake	Pongo_pygmaeus-KB5405_Louis	Pongo_abelii-A953_Vicki	Gorilla_gorilla_gorilla-B650_Katie	Pan_paniscus-A923_Kombote	Gorilla_gorilla_gorilla-A935_Fritz	Pan_troglodytes_ellioti-Basho	Pan_troglodytes_ellioti-Tobi	Gorilla_gorilla_gorilla-9749_Kowali	Gorilla_gorilla_gorilla-KB6039_Oko	Homo_sapiens-San_HGDP01029	Gorilla_gorilla_gorilla-A932_Mimi	Gorilla_gorilla_gorilla-Kwan	Gorilla_gorilla_gorilla-KB3782_Vila	Pongo_pygmaeus-KB5406_Doris	Pan_paniscus-A926_Natalie	Gorilla_gorilla_gorilla-B644_Paki	Gorilla_gorilla_gorilla-KB3784_Dolly	Pan_troglodytes_ellioti-Julie	Gorilla_beringei_graueri-A929_Kaisi	Pongo_pygmaeus-KB5404_Billy	Pan_troglodytes_verus-X00100_Koby	Pan_troglodytes_ellioti-Damian	Gorilla_gorilla_gorilla-X00108_Abe	Pongo_pygmaeus-KB4204_Dinah	Pan_troglodytes_troglodytes-A960_Clara	Pongo_pygmaeus-A944_Napoleon	Gorilla_gorilla_dielhi-B646_Nyango	Pongo_abelii-A947_Elsi	Gorilla_gorilla_gorilla-KB5852_Helen	Gorilla_gorilla_gorilla-KB4986_Katie	Pan_paniscus-A951_Pongo	Gorilla_gorilla_gorilla-B643_Choomba	Pan_troglodytes_schweinfurthii-Yolanda	Gorilla_gorilla_gorilla-A933_Dian	Gorilla_gorilla_gorilla-9752_Suzie	Gorilla_gorilla_gorilla-X00109_Tzambo	Gorilla_gorilla_gorilla-9750_Azizi	Gorilla_gorilla_gorilla-KB7973_Porta	Pan_paniscus-X00095_Kakowet	Homo_sapiens-Sardinian_HGDP00665	Pan_paniscus-A925_Bono	Pan_paniscus-A918_Hermien
chr1:342168-361601	Gbeg-Ggod-Ggog-Pab-Ppy	19433	OR4F16,OR4F29,OR4F3	9	0	0	0	0	0	0	16	0	9	8	0	0	19	0	0	0	0	16	0	0	9	0	0	8	9	0	0	8	0	0	0	0	0	16	0	10	0	0	0	0	0	15	16	16	19
chr1:607772-627266	Gbeg-Ggod-Ggog-Pab-Ppy	19494	OR4F3,OR4F16,OR4F29	10	0	0	0	0	0	0	16	0	9	8	0	0	19	0	0	0	0	16	0	0	9	0	0	8	9	0	0	7	0	0	0	0	0	16	0	10	0	0	0	0	0	15	17	16	19
chr1:5438535-5442875	fixed_Ppy	4340		2	2	2	2	0	2	2	2	2	2	2	2	2	2	2	2	1	0	2	2	2	2	2	0	2	1	2	0	2	0	2	2	2	2	2	2	2	2	2	2	2	2	2	2	2	2
chr1:5781481-5787867	fixed_Gbeg-Ggod-Ggog	6386		2	2	0	0	2	2	0	2	0	2	2	0	0	2	0	0	0	2	2	0	0	2	0	2	2	2	0	2	2	2	0	2	0	0	2	0	2	0	0	0	0	0	2	2	2	2
chr1:5893713-5896705	fixed_Pab-Ppy	2992	NPHP4	2	0	2	2	0	0	2	2	2	2	2	1	2	2	2	2	2	0	2	2	2	2	2	0	2	2	2	0	2	0	2	0	2	2	2	1	2	2	2	2	2	2	2	2	2	2
chr1:8371949-8372449	fixed_Pab-Ppy	500	RERE	2	0	2	2	0	0	2	2	2	2	2	2	1	2	2	2	1	0	2	2	2	2	2	0	2	2	2	0	2	0	2	0	2	2	2	2	2	2	2	2	2	2	2	2	2	2
chr1:10482713-10486025	fixed_Ggod	3312	PEX14	2	2	1	1	2	2	1	2	2	2	1	2	2	2	2	1	2	2	2	2	2	2	2	2	2	2	2	2	2	2	0	2	1	2	2	1	2	2	2	2	2	2	2	2	2	2
chr1:11345706-11348820	fixed_Ppa	3114		1	2	2	2	2	2	1	0	2	2	1	2	2	3	2	2	2	2	0	2	1	2	2	2	2	2	2	3	2	2	2	2	2	2	0	2	2	2	2	2	2	2	0	2	0	0
chr1:11871969-11882056	fixed_Ppa-Ptre-Ptrs-Ptrt-Ptrv	10087		0	2	2	2	2	2	2	0	2	0	0	2	2	2	1	2	2	2	0	2	2	0	2	2	0	0	2	2	0	2	1	2	2	2	0	1	0	2	2	2	2	2	0	2	0	0
chr1:23866742-23871041	fixed_Ptre-Ptrs-Ptrt-Ptrv	4299		0	3	2	2	1	3	2	3	2	0	0	2	2	3	2	2	2	1	2	2	2	0	2	2	0	0	2	1	0	1	2	2	2	2	2	2	0	2	2	2	2	2	2	2	2	2
chr1:25780040-25781040	fixed_Ppa	1000		2	2	2	3	2	2	3	0	2	2	2	2	1	2	2	2	2	2	0	3	2	2	2	2	2	3	2	2	2	2	2	2	2	2	0	2	2	2	3	2	2	2	0	3	0	0
chr1:26043816-26054619	fixed_Gbeg-Ggod-Ggog	10803	C1orf135	2	2	0	0	2	2	0	2	0	2	2	0	0	2	0	0	0	2	2	0	0	2	0	2	2	2	0	2	2	2	0	2	0	0	2	0	2	0	0	0	0	0	2	2	2	2
chr1:28116805-28119398	fixed_Hde	2593		2	2	2	2	2	2	2	2	2	2	2	2	2	3	2	2	2	2	2	2	2	2	2	3	2	2	2	2	2	2	2	2	2	2	2	2	2	2	2	2	2	2	2	2	2	2
chr1:31746122-31753602	fixed_Gbeg-Ggod-Ggog	7480	LOC149086	2	2	0	0	2	2	0	2	0	2	2	0	0	3	0	0	0	2	3	0	0	2	0	2	2	2	0	2	2	2	0	2	0	0	3	0	2	0	0	0	0	0	2	2	2	2
chr1:34103853-34104353	fixed_Gbeg-Ggod-Ggog	500	CSMD2	2	2	0	0	2	2	0	2	0	3	2	0	0	3	0	0	0	2	2	0	0	2	0	2	3	2	0	2	2	2	0	2	0	0	2	0	2	0	0	0	0	0	2	2	2	2
chr1:36029963-36034910	fixed_Ppa-Ptre-Ptrs-Ptrt-Ptrv	4947		0	2	2	2	2	2	2	0	2	0	0	2	1	2	2	1	2	1	0	2	2	0	2	1	0	0	2	2	0	2	2	2	2	2	0	2	0	2	2	2	2	2	0	2	0	0
chr1:36651414-36654830	fixed_Ppa-Ptre-Ptrs-Ptrt-Ptrv	3416		0	2	2	2	2	2	2	0	2	0	0	2	2	2	2	2	2	2	0	2	2	0	2	2	0	0	2	2	0	2	2	2	2	2	0	2	0	2	2	2	2	2	0	2	0	0
chr1:45301914-45306236	fixed_Pab-Ppy	4322	ZSWIM5	2	0	2	2	0	0	2	2	2	2	1	2	2	2	2	2	1	0	2	1	2	2	2	0	2	2	2	0	2	0	1	0	2	2	2	2	2	2	2	2	2	2	1	2	2	2
chr1:47189430-47208966	fixed_Pab-Ppy	19536		2	0	2	2	0	0	2	2	2	2	2	2	2	2	2	2	2	0	3	3	2	2	2	0	2	2	3	0	2	0	2	0	2	2	2	2	2	3	2	2	2	3	2	3	3	2
chr1:47590780-47603362	fixed_Ppa-Ptre-Ptrs-Ptrt-Ptrv	12582	CMPK1	0	2	2	2	2	2	2	0	2	0	0	2	2	2	2	2	2	2	0	2	2	0	2	2	0	0	2	2	0	2	2	2	2	2	0	2	0	2	2	2	2	2	0	2	0	0
chr1:47631098-47635566	fixed_Pab-Ppy	4468		2	0	2	2	0	0	2	2	2	2	2	2	2	2	2	2	2	0	2	3	2	2	2	0	2	2	2	0	2	0	2	0	2	2	2	2	2	2	2	2	2	2	2	3	2	2
chr1:49708417-49725187	fixed_Gbeg-Ggod-Ggog	16770	AGBL4	2	2	0	0	2	2	0	2	0	2	2	0	0	2	0	0	0	2	2	0	0	2	0	2	2	2	0	1	2	2	0	2	0	0	2	0	2	0	0	0	0	0	2	2	2	2
chr1:50960484-50973146	fixed_Gbeg-Ggod-Ggog	12662	FAF1	2	2	0	0	2	2	0	2	0	2	2	0	0	2	0	0	0	2	2	0	0	2	0	2	2	2	0	2	2	2	0	2	0	0	2	0	2	0	0	0	0	0	2	2	2	2
chr1:52473106-52474850	fixed_Pab-Ppy	1744	ZFYVE9	2	0	2	2	0	0	2	2	2	2	2	2	2	2	2	2	2	0	2	2	2	2	2	0	2	2	2	0	2	0	2	0	2	2	2	2	1	3	2	2	2	2	2	3	2	2
chr1:54061119-54061619	fixed_Ppa-Ptre-Ptrs-Ptrt-Ptrv	500	TMEM48	0	1	3	1	2	1	2	0	2	0	0	2	2	2	2	2	2	2	0	2	2	0	2	1	0	0	2	1	0	1	2	1	2	2	0	2	0	2	2	2	2	2	0	2	0	0
chr1:62263030-62267708	fixed_Gbeg-Ggod-Ggog	4678	INADL	2	2	0	0	1	2	0	2	0	2	2	0	0	2	0	0	0	2	2	0	0	2	0	2	2	2	0	2	2	2	0	2	0	0	2	0	2	0	0	0	0	0	2	3	2	2
chr1:63408193-63416462	fixed_Gbeg-Ggod-Ggog	8269	LINC00466	2	2	0	0	2	2	0	2	0	2	2	0	0	2	0	0	0	2	2	0	0	2	0	2	2	2	0	2	2	2	0	2	0	0	2	0	2	0	0	0	0	0	2	2	2	2
chr1:65844998-65845601	fixed_Pab-Ppy	603	LEPR	2	0	2	2	0	0	3	2	2	2	2	2	2	2	2	2	2	0	2	2	2	2	2	0	2	2	2	0	2	0	3	0	3	2	2	3	2	2	2	2	2	3	2	3	2	2
chr1:66631987-66633081	Gbeg-Ggod-Ggog-Ppa-Ptre-Ptrs-Ptrt-Ptrv	1094		0	2	0	0	2	2	0	0	0	0	0	0	0	3	0	0	0	1	0	0	0	0	0	1	0	0	0	2	0	2	0	2	0	0	0	0	0	0	0	0	0	0	0	2	0	0
chr1:70229581-70230081	fixed_Pab-Ppy	500	LRRC7	2	0	2	2	0	0	2	2	2	2	1	2	2	3	2	1	1	0	2	2	2	2	2	0	2	2	3	0	2	0	3	0	2	1	2	3	2	2	2	1	2	2	2	3	2	2
chr1:70806506-70812394	fixed_Ppa-Ptre-Ptrs-Ptrt-Ptrv	5888		0	2	2	2	2	2	2	0	2	0	0	2	2	2	2	2	2	2	0	2	2	0	2	2	0	0	2	2	0	2	2	2	2	2	0	2	0	2	2	2	2	2	0	2	0	0
chr1:72876301-72882390	fixed_Gbeg	6089		2	2	2	2	1	2	2	2	1	2	2	1	2	2	2	2	1	2	2	2	0	2	0	2	2	2	1	2	2	2	1	2	1	2	2	1	2	1	2	2	1	1	2	2	2	2
chr1:73218634-73225292	fixed_Ppa	6658		1	2	2	2	2	2	2	0	2	1	1	1	2	2	2	2	2	1	0	2	2	2	2	1	2	2	2	1	2	2	2	1	2	2	0	2	2	2	2	2	2	2	0	2	0	0
chr1:75113953-75133855	fixed_Pab-Ppy	19902		2	0	2	2	0	0	2	2	2	2	2	2	2	2	2	2	2	0	2	2	2	2	2	0	2	2	2	0	2	0	2	0	2	2	2	2	2	2	2	2	2	2	2	2	2	2
chr1:75534115-75537902	fixed_Pab-Ppy	3787	SLC44A5	2	0	2	3	0	0	2	2	2	2	1	2	1	2	2	1	2	0	2	2	2	2	2	0	2	2	2	0	2	0	2	0	2	2	2	2	2	2	2	2	2	2	2	2	2	2
chr1:75882368-75944975	fixed_Pab-Ppy	62607		2	0	2	2	0	0	2	2	2	2	2	2	2	2	2	2	2	0	2	2	2	2	2	0	2	2	2	0	2	0	2	0	2	2	2	2	2	2	2	2	2	2	2	2	2	2
chr1:77409353-77410237	fixed_Pab-Ppy	884	PIGK	2	0	3	2	0	0	2	2	2	2	2	2	2	2	2	1	2	0	2	2	2	2	2	0	2	2	2	0	2	0	2	0	2	2	2	2	2	2	2	2	2	2	2	2	2	2
chr1:78800043-78804956	fixed_Gbeg-Ggod-Ggog	4913		2	2	0	0	2	2	0	2	0	2	2	0	0	2	0	0	0	1	2	0	0	2	0	1	2	2	0	1	2	2	0	2	0	0	2	0	2	0	0	0	0	0	2	2	2	2
chr1:78804956-78814075	Gbeg-Ggod-Ggog-Ppa-Ptre-Ptrs-Ptrt-Ptrv	9119		0	2	0	0	1	2	0	0	0	0	0	0	0	2	0	0	0	1	0	0	0	0	0	2	0	0	0	2	0	2	0	2	0	0	0	0	0	0	0	0	0	0	0	2	0	0
chr1:78814075-78815770	fixed_Ppa-Ptre-Ptrs-Ptrt-Ptrv	1695		0	2	2	2	2	2	2	0	2	0	0	2	2	2	2	2	2	2	0	2	2	0	2	2	0	0	2	2	0	2	2	2	2	2	0	2	0	2	2	2	2	2	0	2	0	0
chr1:79072838-79074228	fixed_Gbeg-Ggod-Ggog	1390		2	2	0	0	2	2	0	2	0	2	1	0	0	2	0	0	0	1	2	0	0	1	0	2	1	2	0	2	2	2	0	2	0	0	2	0	1	0	0	0	0	0	1	2	2	2
chr1:79634994-79638923	fixed_Pab-Ppy	3929		2	0	2	2	0	0	2	2	2	2	1	2	2	2	2	2	2	0	2	2	2	2	2	0	2	2	2	0	2	0	2	0	2	2	2	2	2	2	2	2	2	2	2	2	2	2
chr1:80943024-80944617	fixed_Pab-Ppy	1593		2	0	1	2	0	0	2	2	2	2	2	2	2	2	2	1	2	0	2	2	2	2	2	0	2	2	2	0	1	0	2	0	2	2	2	2	2	2	2	2	2	2	2	2	2	2
chr1:80998688-80999688	fixed_Pab-Ppy	1000		2	0	1	2	0	0	2	2	2	2	2	2	2	2	2	2	2	1	2	2	2	2	2	0	1	2	2	0	1	0	2	0	2	2	2	2	2	2	2	2	2	2	2	2	2	2
chr1:81031379-81038752	fixed_Pab-Ppy	7373		2	0	2	2	0	0	2	2	2	2	1	2	2	2	2	2	2	0	2	2	2	2	2	0	2	2	2	0	2	0	2	0	2	2	2	2	2	2	2	2	2	2	2	2	2	2
chr1:84767156-84772011	fixed_Gbeg-Ggod-Ggog	4855		2	2	0	0	2	2	0	2	0	2	2	0	0	2	0	0	0	2	2	0	0	2	0	2	2	2	0	2	2	2	0	2	0	0	2	0	2	0	0	0	0	0	2	2	2	2
chr1:86069281-86069781	fixed_Ppa-Ptre-Ptrs-Ptrt-Ptrv	500	COL24A1	0	2	2	2	1	2	1	0	2	0	0	2	2	2	2	2	2	1	0	2	2	0	2	2	0	0	2	1	0	2	2	2	1	2	0	2	0	2	2	2	2	2	0	2	0	0
chr1:86824734-86830631	fixed_Ptre-Ptrs-Ptrt-Ptrv	5897		0	2	2	2	1	2	2	2	2	0	0	2	2	2	2	2	2	2	2	2	2	0	2	2	0	0	2	2	0	2	2	2	2	2	2	2	0	2	2	2	2	2	2	3	2	2
chr1:88062242-88063976	fixed_Pab-Ppy	1734		2	0	2	2	0	0	3	2	2	2	2	2	2	2	2	3	2	0	2	2	2	2	2	0	2	2	2	0	3	0	2	0	2	2	2	3	2	2	2	2	2	2	2	3	2	2
chr1:89562474-89571395	fixed_Ppa-Ptre-Ptrs-Ptrt-Ptrv	8921		0	2	2	2	2	2	2	0	2	0	0	2	2	3	2	2	2	2	0	2	2	0	2	2	0	0	2	2	0	2	2	2	2	2	0	2	0	2	2	2	2	2	0	3	0	0
chr1:90571194-90573559	fixed_Ppa	2365		2	2	2	2	2	2	2	0	2	2	2	2	2	2	2	2	2	2	0	2	2	2	2	2	1	2	2	2	2	2	2	2	2	2	0	2	2	2	2	2	2	2	0	2	0	0
chr1:93284138-93295065	fixed_Ptrv	10927		0	2	2	2	2	2	2	2	2	2	2	2	2	2	2	2	2	2	2	2	2	2	2	2	0	2	2	2	2	2	2	2	2	2	2	2	2	2	2	2	2	2	2	2	2	2
chr1:97031319-97033188	fixed_Gbeg-Ggod-Ggog	1869	PTBP2	2	2	0	0	2	2	0	2	0	2	2	0	0	2	0	0	0	2	2	0	0	2	0	1	2	2	0	2	2	2	0	2	0	0	2	0	2	0	0	0	0	0	2	2	2	2
chr1:98980273-98981284	fixed_Pab-Ppy	1011	SNX7	2	0	1	2	0	0	3	2	1	1	1	2	1	2	2	2	2	0	2	2	2	1	1	0	1	2	2	0	2	0	3	0	2	1	2	2	2	1	2	2	1	1	2	2	2	2
chr1:101300168-101303961	fixed_Pab-Ppy	3793		2	0	2	2	0	0	2	2	2	2	2	2	2	2	2	2	2	0	2	2	2	2	2	0	2	2	2	0	2	0	2	0	2	2	2	2	2	2	2	2	2	2	2	2	2	2
chr1:102961878-102965591	fixed_Pab-Ppy	3713		2	0	2	2	0	0	2	2	2	2	1	2	2	2	2	2	2	0	2	2	2	2	2	0	2	2	2	0	2	0	2	0	2	2	2	2	1	2	2	2	2	2	2	2	2	2
chr1:104283737-104291539	fixed_Gbeg-Ggod-Ggog	7802		2	2	0	0	2	2	0	2	0	2	1	0	0	2	0	0	0	2	2	0	0	2	0	2	2	2	0	2	2	2	0	2	0	0	2	0	2	0	0	0	0	0	2	2	2	2
chr1:104345406-104356407	fixed_Pab-Ppy	11001		2	0	1	2	0	0	2	2	2	2	2	2	2	2	2	2	2	0	2	2	2	2	2	0	2	2	2	0	2	0	2	0	2	2	2	2	2	2	2	2	2	2	2	2	2	2
chr1:104475420-104478447	fixed_Ppa-Ptre-Ptrs-Ptrt-Ptrv	3027		0	2	2	2	2	2	2	0	2	0	0	2	2	2	2	1	2	3	0	2	2	0	2	2	0	0	2	1	0	2	2	2	2	1	0	2	0	2	2	2	2	2	0	2	0	0
chr1:104765315-104768953	fixed_Ppa-Ptre-Ptrs-Ptrt-Ptrv	3638		0	2	2	2	1	2	2	0	2	0	0	2	2	2	2	1	2	2	0	2	2	0	2	2	0	0	1	2	0	2	2	2	2	2	0	2	0	2	2	2	2	2	0	2	0	0
chr1:105627039-105641535	fixed_Ppa-Ptre-Ptrs-Ptrt-Ptrv	14496		0	2	2	2	2	2	2	0	2	0	0	2	2	2	2	1	2	2	0	2	2	0	2	2	0	0	2	2	0	2	2	2	2	2	0	2	0	2	2	2	2	2	0	2	0	0
chr1:108153531-108156714	fixed_Gbeg-Ggod-Ggog	3183	VAV3	2	2	0	0	2	2	0	2	0	2	2	0	0	2	0	0	0	2	2	0	0	2	0	2	2	2	0	2	2	2	0	2	0	0	2	0	2	0	0	0	0	0	2	2	2	2
chr1:108265587-108268657	fixed_Hde	3070	VAV3	2	2	2	2	2	2	2	2	2	2	1	2	2	2	2	2	2	2	2	2	2	2	2	2	2	2	1	1	2	2	2	2	2	2	2	2	2	2	2	2	2	2	2	2	2	2
chr1:108654203-108714325	fixed_Ppa-Ptre-Ptrs-Ptrt-Ptrv	60122		0	2	2	2	2	2	2	0	2	0	0	2	2	2	2	2	2	2	0	2	2	0	2	2	0	0	2	2	0	2	2	2	2	2	0	2	0	2	2	2	2	2	0	2	0	0
chr1:110607067-110609399	fixed_Ppa	2332		2	2	2	2	2	2	2	0	2	2	2	2	2	2	2	2	2	2	0	2	2	2	2	2	2	2	2	2	2	2	2	2	2	2	0	2	2	2	2	2	2	2	0	2	0	0
chr1:111180843-111191404	fixed_Ppa-Ptre-Ptrs-Ptrt-Ptrv	10561		0	2	2	2	2	2	2	0	2	0	0	2	2	2	2	2	2	2	0	2	2	0	2	2	0	0	2	2	0	2	2	2	2	2	0	2	0	2	2	2	2	2	0	2	0	0
chr1:118046784-118048230	fixed_Pab-Ppy	1446		2	0	1	1	0	0	1	2	1	2	1	2	2	2	1	2	2	0	2	2	1	1	2	0	2	2	1	0	2	0	2	0	2	1	2	2	2	2	2	2	2	2	1	2	2	2
chr1:118541676-118546111	fixed_Pab-Ppy	4435		2	0	2	2	0	0	2	2	2	2	2	2	2	2	2	2	2	0	2	2	2	2	2	0	2	2	2	0	2	0	2	0	2	2	2	2	2	2	2	2	2	2	2	2	2	2
chr1:119053633-119055776	fixed_Ppa-Ptre-Ptrs-Ptrt-Ptrv	2143		0	2	2	2	2	2	2	0	2	0	0	2	2	2	2	1	2	2	0	2	2	0	2	2	0	0	2	2	0	2	2	2	2	2	0	2	0	2	2	2	2	2	0	3	0	0
chr1:119628885-119631263	fixed_Gbeg-Ggod-Ggog	2378		2	2	0	0	2	2	0	2	0	2	1	0	0	2	0	0	0	2	2	0	0	2	0	2	2	2	0	2	2	2	0	2	0	0	2	0	2	0	0	0	0	0	2	2	2	2
chr1:144450553-144454812	fixed_Ptrv	4259	PDZK1	0	2	4	4	2	2	4	2	5	2	2	4	4	2	4	4	4	2	2	4	4	2	4	2	0	2	4	2	2	2	5	2	4	4	2	4	2	4	4	4	4	4	2	2	2	2
chr1:150444464-150445539	fixed_Ppa-Ptre-Ptrs-Ptrt-Ptrv	1075		0	2	2	2	2	2	2	0	2	0	0	2	2	2	2	2	2	2	0	2	2	0	2	2	0	0	2	2	0	2	2	3	2	2	0	2	0	2	2	2	2	3	0	3	0	0
chr1:150488374-150506819	fixed_Ppa	18445		2	2	2	2	2	2	2	0	2	2	1	2	2	2	2	2	1	2	0	2	2	2	2	2	2	2	2	2	2	2	2	2	2	2	0	2	2	2	2	2	2	2	0	2	0	0
chr1:150822089-150852064	fixed_Hde	29975	LCE3C	2	2	2	2	2	2	2	2	2	2	2	2	2	1	2	2	2	3	2	2	2	2	2	3	2	2	2	2	2	3	2	2	2	2	2	2	2	2	2	2	2	2	2	1	2	2
chr1:151405436-151407282	fixed_Pab-Ppy	1846		2	0	2	2	0	0	2	2	2	2	1	2	2	3	2	2	2	0	2	2	2	2	2	0	2	2	2	0	2	0	2	0	2	2	2	2	2	2	2	2	2	2	2	3	2	2
chr1:154606358-154609065	fixed_Pab-Ppy	2707	RHBG	2	0	2	2	0	0	2	2	2	2	2	2	2	2	2	2	2	0	2	2	2	2	2	0	2	2	2	0	2	0	2	0	2	2	2	1	2	2	2	2	2	2	2	2	2	2
chr1:155482062-155496558	fixed_Ppa	14496		2	2	2	2	2	2	2	0	2	2	2	2	2	2	2	2	2	2	0	2	2	2	2	2	2	2	2	2	1	2	2	2	2	2	0	2	2	2	2	2	2	2	0	2	0	0
chr1:157604497-157631485	fixed_Gbeg-Ggod-Ggog	26988		2	2	0	0	1	2	0	2	0	2	2	0	0	2	0	0	0	2	2	0	0	2	0	1	2	2	0	2	2	2	0	2	0	0	2	0	2	0	0	0	0	0	2	2	2	2
chr1:159951113-159952113	fixed_Gbeg-Ggod-Ggog	1000		1	2	0	0	2	2	0	2	0	2	2	0	0	2	0	0	0	2	2	0	0	2	0	2	2	2	0	1	2	2	0	2	0	0	2	0	2	0	0	0	0	0	2	3	2	2
chr1:160154568-160156529	fixed_Gbeg-Ggod-Ggog	1961	ATF6	2	2	0	0	2	2	0	2	0	2	2	0	0	2	0	0	0	2	2	0	0	2	0	2	2	2	0	2	2	2	0	2	0	0	2	0	2	0	0	0	0	0	2	2	2	2
chr1:164987157-164998765	fixed_Gbeg-Ggod-Ggog	11608		2	2	0	0	2	2	0	2	0	2	2	0	0	2	0	0	0	2	2	0	0	2	0	2	2	2	0	2	2	2	0	2	0	0	2	0	2	0	0	0	0	0	2	2	2	2
chr1:165924605-165925725	fixed_Pab-Ppy	1120	RCSD1	2	0	2	2	0	0	2	2	2	2	2	2	2	3	2	2	2	0	2	2	2	2	2	0	2	2	2	0	2	0	2	0	2	2	2	2	2	2	2	2	2	2	2	3	2	2
chr1:171333970-171337965	Gbeg-Ggod-Ggog-Ppa-Ptre-Ptrs-Ptrt-Ptrv	3995		0	2	0	0	2	2	0	0	0	0	0	0	0	2	0	0	0	2	0	0	0	0	0	2	0	0	0	2	0	2	0	2	0	0	0	0	0	0	0	0	0	0	0	2	0	0
chr1:172415804-172427451	fixed_Gbeg-Ggod-Ggog	11647	RABGAP1L	2	2	0	0	2	2	0	2	0	2	2	0	0	2	0	0	0	2	2	0	0	2	0	2	2	2	0	2	2	2	0	2	0	0	2	0	2	0	0	0	0	0	2	3	2	2
chr1:174579479-174591603	fixed_Gbeg-Ggod-Ggog	12124		2	2	0	0	2	2	0	2	0	2	2	0	0	3	0	0	0	2	2	0	0	2	0	2	2	2	0	2	2	2	0	2	0	0	2	0	2	0	0	0	0	0	2	2	2	2
chr1:176386367-176395314	fixed_Hde	8947	RASAL2	2	2	2	2	2	2	2	2	2	2	1	2	2	2	2	1	2	2	2	2	2	2	2	2	2	2	2	2	2	2	2	2	2	2	2	2	2	2	2	2	2	2	2	2	2	2
chr1:176451409-176458365	fixed_Ppa-Ptre-Ptrs-Ptrt-Ptrv	6956	RASAL2	0	2	3	2	2	2	2	0	2	0	0	2	2	2	2	2	2	2	0	2	2	0	2	2	0	0	2	2	0	2	2	2	2	3	0	2	0	2	2	2	2	2	0	2	0	0
chr1:176823150-176826732	fixed_Ppa-Ptre-Ptrs-Ptrt-Ptrv	3582		0	2	2	2	2	2	2	0	2	0	0	2	2	2	2	2	2	2	0	2	2	0	2	2	0	0	2	2	0	2	2	2	2	2	0	2	0	2	2	2	2	2	0	2	0	0
chr1:177029665-177036590	fixed_Ppa-Ptre-Ptrs-Ptrt-Ptrv	6925	RALGPS2	0	2	2	2	2	2	2	0	2	0	0	2	2	2	2	2	2	2	0	2	2	0	2	2	0	0	2	2	0	2	2	2	2	2	0	2	0	2	2	2	2	2	0	2	0	0
chr1:179942915-179945722	fixed_Pab-Ppy	2807	CACNA1E	2	0	2	2	0	0	3	2	2	2	2	2	2	2	2	2	1	0	2	2	2	2	2	0	2	2	2	0	2	0	2	0	2	2	2	2	2	2	2	2	2	2	2	3	2	2
chr1:181283215-181288646	fixed_Pab-Ppy	5431	LAMC1	2	0	2	2	0	0	2	2	2	2	2	2	1	2	2	2	2	0	2	2	2	2	2	0	2	2	2	0	2	0	2	0	2	2	2	2	2	2	2	2	2	2	2	3	2	2
chr1:184085114-184088440	fixed_Gbeg-Ggod-Ggog	3326	HMCN1	2	2	0	0	2	1	0	2	0	2	1	0	0	2	0	0	0	2	2	0	0	2	0	1	1	2	0	2	2	2	0	2	0	0	2	0	2	0	0	0	0	0	2	2	2	2
chr1:185237831-185255781	fixed_Ppa-Ptre-Ptrs-Ptrt-Ptrv	17950		0	2	1	2	2	2	2	0	2	0	0	2	2	2	2	2	2	2	0	2	2	0	2	2	0	0	2	2	0	2	2	2	2	2	0	2	0	2	2	2	2	2	0	2	0	0
chr1:186430488-186437086	fixed_Pab-Ppy	6598		2	0	2	2	0	0	2	2	2	2	1	2	2	2	2	2	2	0	2	2	2	2	2	0	2	2	2	0	1	0	2	0	2	2	2	2	1	2	2	2	2	2	2	2	2	2
chr1:187075136-187080790	fixed_Pab-Ppy	5654		2	0	2	2	0	0	2	2	2	2	1	2	1	2	2	1	2	0	2	2	2	2	2	0	2	2	2	0	2	0	2	0	2	2	2	2	2	2	2	2	2	2	2	2	2	2
chr1:187208718-187223856	fixed_Ppa-Ptre-Ptrs-Ptrt-Ptrv	15138		0	2	2	2	1	2	2	0	2	0	0	2	2	2	2	2	2	1	0	2	2	0	2	1	0	0	2	2	0	1	2	2	2	2	0	2	0	2	2	2	2	2	0	2	0	0
chr1:187297452-187302798	fixed_Hde	5346		2	2	2	2	2	2	2	2	2	2	1	2	1	2	2	1	1	2	2	2	2	2	2	1	1	2	1	2	2	2	3	2	2	2	2	2	1	2	2	1	2	2	2	2	2	2
chr1:187481210-187483530	fixed_Pab-Ppy	2320		2	0	2	2	0	0	2	2	2	2	2	2	2	2	2	2	2	0	2	2	2	2	2	0	2	2	2	0	2	0	3	0	2	2	2	2	2	2	2	2	2	2	2	2	2	2
chr1:187517670-187518712	fixed_Pab-Ppy	1042		2	0	1	2	0	0	2	2	2	2	2	2	2	2	2	1	2	0	2	2	2	2	2	0	1	2	2	0	2	0	2	0	2	2	2	2	1	2	2	1	2	2	2	2	2	2
chr1:187691227-187698880	fixed_Pab-Ppy	7653		1	0	1	2	0	0	2	2	2	2	1	2	2	2	2	1	2	0	2	2	2	2	2	0	2	2	2	0	1	0	2	0	2	2	2	2	1	2	2	2	2	2	2	2	2	2
chr1:187797065-187801414	Gbeg-Ggod-Ggog-Ppa-Ptre-Ptrs-Ptrt-Ptrv	4349		0	2	0	0	2	1	0	0	0	0	0	0	0	2	0	0	0	2	0	0	0	0	0	2	0	0	0	2	0	1	0	2	0	0	0	0	0	0	0	0	0	0	0	2	0	0
chr1:188051202-188056035	fixed_Ppa-Ptre-Ptrs-Ptrt-Ptrv	4833		0	2	1	2	2	2	2	0	2	0	0	2	2	2	2	2	1	2	0	2	1	0	2	2	0	0	2	2	0	2	2	2	2	1	0	2	0	1	2	2	2	2	0	2	0	0
chr1:188117268-188122241	fixed_Ppa-Ptre-Ptrs-Ptrt-Ptrv	4973		0	2	2	2	2	2	2	0	2	0	0	2	2	2	2	2	2	2	0	2	2	0	2	2	0	0	2	2	0	2	2	2	2	2	0	2	0	2	2	2	2	2	0	2	0	0
chr1:188396751-188401434	fixed_Pab-Ppy	4683	FAM5C	2	0	2	2	0	0	2	2	2	2	2	2	2	2	2	1	2	0	2	2	2	2	2	0	1	2	1	0	2	0	2	0	2	2	2	2	2	2	2	1	2	2	2	2	2	2
chr1:188630742-188632667	fixed_Pab-Ppy	1925	FAM5C	2	0	1	2	0	0	2	1	2	2	1	2	2	2	2	1	1	0	2	2	1	2	2	0	2	2	2	0	1	0	2	0	2	2	2	2	2	2	2	2	2	2	2	2	2	2
chr1:188875990-188878675	fixed_Ppa-Ptre-Ptrs-Ptrt-Ptrv	2685	LOC440704	0	1	1	2	2	1	2	0	2	0	0	2	2	2	2	1	2	2	0	2	2	0	2	2	0	0	1	2	0	1	2	2	2	2	0	2	0	2	2	2	2	1	0	2	0	0
chr1:189067121-189081652	fixed_Pab-Ppy	14531		2	0	2	2	0	0	2	2	2	2	1	2	2	2	2	1	2	0	2	2	2	2	2	0	2	2	2	0	2	0	2	0	2	2	2	2	2	2	2	2	2	2	2	2	2	2
chr1:189127274-189129735	fixed_Pab-Ppy	2461		2	0	2	2	0	0	2	2	2	2	2	2	2	2	2	1	2	0	2	2	2	2	2	0	2	2	2	0	2	0	2	0	2	2	2	3	2	2	2	2	2	2	2	2	2	2
chr1:189181122-189186161	fixed_Ggod	5039		2	2	1	2	2	2	2	2	1	2	2	2	0	2	2	2	2	2	2	1	2	2	2	2	2	2	2	1	2	2	0	2	2	2	2	2	2	1	2	2	2	2	2	2	2	2
chr1:189427089-189442112	fixed_Ppa	15023		2	2	2	2	2	2	2	0	2	2	2	2	2	2	2	1	2	2	0	2	2	2	2	2	2	2	2	2	2	1	2	2	2	2	0	2	2	2	2	2	2	2	0	2	0	0
chr1:191145120-191149614	fixed_Ppa-Ptre-Ptrs-Ptrt-Ptrv	4494		0	2	2	3	2	2	3	0	2	0	0	2	2	3	2	2	2	2	0	2	2	0	2	2	0	0	2	2	0	2	3	2	2	2	0	3	0	2	2	2	2	2	0	3	0	0
chr1:191716422-191717861	fixed_Pab-Ppy	1439		2	0	1	2	0	0	2	2	2	2	1	2	2	2	2	1	2	0	2	2	2	2	2	0	2	2	2	0	1	0	2	0	2	2	2	2	2	2	2	2	2	2	2	2	2	2
chr1:192696463-192711270	fixed_Pab-Ppy	14807		2	0	1	2	0	0	2	2	2	2	1	2	2	2	2	2	2	0	2	2	2	2	2	0	2	2	2	0	1	0	2	0	2	2	2	2	2	2	2	2	2	2	2	2	2	2
chr1:192994424-192997340	fixed_Pab-Ppy	2916		2	0	1	1	0	0	2	2	1	2	2	2	1	2	1	1	2	0	2	2	2	2	2	0	2	2	1	0	1	0	1	0	1	1	2	2	2	2	2	2	2	2	2	2	2	2
chr1:193138216-193140952	fixed_Gbeg-Ggod-Ggog	2736		2	2	0	0	2	2	0	1	0	1	1	0	0	2	0	0	0	2	2	0	0	2	0	2	1	2	0	2	2	2	0	2	0	0	2	0	1	0	0	0	0	0	1	2	2	2
chr1:193457089-193465974	fixed_Gbeg-Ggod-Ggog	8885		2	2	0	0	2	2	0	2	0	2	2	0	0	2	0	0	0	2	2	0	0	2	0	2	2	2	0	2	2	2	0	2	0	0	2	0	2	0	0	0	0	0	2	2	2	2
chr1:193616021-193622110	fixed_Pab-Ppy	6089		2	0	2	2	0	0	2	2	2	2	2	2	2	2	2	1	2	0	2	3	2	2	2	0	1	2	2	0	2	0	2	0	2	2	2	2	2	2	2	2	2	2	2	2	2	2
chr1:193630917-193639438	fixed_Pab-Ppy	8521		2	0	2	2	0	0	2	2	2	2	2	2	2	2	2	1	2	0	2	2	2	2	2	0	2	2	2	0	2	0	2	0	2	2	2	2	2	2	2	2	2	1	2	2	2	2
chr1:193735818-193750698	fixed_Ppa-Ptre-Ptrs-Ptrt-Ptrv	14880		0	2	2	2	2	2	2	0	2	0	0	2	2	2	2	1	2	2	0	2	2	0	2	2	0	0	1	2	0	2	2	2	2	2	0	2	0	2	2	1	2	2	0	2	0	0
chr1:193780714-193782016	fixed_Pab-Ppy	1302		2	0	1	2	0	0	2	2	2	2	2	2	2	2	2	2	2	0	2	2	2	2	2	0	2	2	2	0	1	0	2	0	2	2	2	2	2	2	2	2	2	1	2	2	2	2
chr1:193827886-193834538	fixed_Gbeg-Ggod-Ggog	6652		2	2	0	0	2	2	0	2	0	2	2	0	0	2	0	0	0	2	2	0	0	2	0	2	2	2	0	2	2	2	0	2	0	0	2	0	1	0	0	0	0	0	2	2	2	2
chr1:194136732-194138415	fixed_Pab-Ppy	1683		2	0	2	2	0	0	2	2	2	2	1	2	2	2	2	2	2	0	2	2	2	2	2	0	1	2	2	0	1	0	2	0	2	2	2	2	2	2	2	2	2	2	1	2	2	2
chr1:194388605-194413759	Gbeg-Ggod-Ggog-Ppa-Ptre-Ptrs-Ptrt-Ptrv	25154		0	2	0	0	2	2	0	0	0	0	0	0	0	2	0	0	0	2	0	0	0	0	0	2	0	0	0	2	0	2	0	2	0	0	0	0	0	0	0	0	0	0	0	2	0	0
chr1:195452363-195457530	fixed_Pab-Ppy	5167	CRB1	2	0	2	2	0	0	2	2	2	2	2	2	2	2	2	2	2	0	2	2	2	2	2	0	2	2	2	0	3	0	2	0	2	2	2	2	2	2	2	2	2	2	3	2	2	2
chr1:197955156-197969076	fixed_Ppa-Ptre-Ptrs-Ptrt-Ptrv	13920		0	2	2	2	2	2	2	0	2	0	0	2	2	2	2	2	2	2	0	2	2	0	2	2	0	0	2	2	0	2	2	2	2	2	0	2	0	2	2	2	2	2	0	2	0	0
chr1:198772744-198779142	fixed_Gbeg-Ggod-Ggog	6398		2	2	0	0	2	2	0	2	0	2	1	0	0	2	0	0	0	2	2	0	0	2	0	2	2	2	0	2	2	2	0	2	0	0	2	0	2	0	0	0	0	0	2	2	2	2
chr1:199097816-199099359	fixed_Hde	1543		2	2	2	2	2	2	2	2	2	2	2	2	2	3	2	2	2	1	2	2	2	2	2	2	2	2	2	2	3	2	2	2	2	2	2	2	2	2	2	2	2	2	2	3	2	2
chr1:206494326-206495311	fixed_Pab-Ppy	985		2	0	2	3	0	0	2	2	2	2	2	2	2	3	2	2	2	0	2	2	2	2	2	0	2	2	2	0	2	0	3	0	2	2	2	2	2	2	2	3	2	2	2	2	2	2
chr1:209659898-209682348	fixed_Gbeg-Ggod-Ggog	22450	LINC00467	2	2	0	0	2	2	0	2	0	2	2	0	0	2	0	0	0	2	2	0	0	2	0	2	1	2	0	2	2	2	0	2	0	0	2	0	2	0	0	0	0	0	2	2	2	2
chr1:211300274-211303844	fixed_Ppa-Ptre-Ptrs-Ptrt-Ptrv	3570	RPS6KC1	0	2	2	2	2	2	2	0	2	0	0	2	2	2	2	2	2	1	0	2	2	0	2	2	0	0	2	1	0	2	2	2	2	2	0	2	0	2	2	2	2	2	0	2	0	0
chr1:213784697-213786855	fixed_Pab-Ppy	2158		2	0	4	6	0	0	5	2	5	2	2	4	5	2	5	5	4	0	2	4	4	2	5	0	2	2	5	0	2	0	4	0	4	5	2	4	2	4	4	5	5	5	2	2	2	2
chr1:214516294-214519257	fixed_Pab-Ppy	2963	USH2A	2	0	2	2	0	0	3	2	2	2	2	2	2	2	2	2	2	0	2	2	2	2	2	0	2	2	2	0	2	0	2	0	2	2	2	2	2	2	2	2	2	2	2	2	2	2
chr1:216070720-216072386	fixed_Hde	1666	SPATA17	2	2	2	2	2	2	2	2	2	2	2	2	1	2	2	1	2	2	2	2	2	2	2	2	1	2	1	2	2	2	2	3	2	1	2	2	1	2	2	1	2	2	1	2	2	2
chr1:216750715-216754795	fixed_Hde	4080		2	2	2	2	2	2	2	2	2	2	2	2	2	2	2	2	2	2	2	2	2	2	2	2	2	2	2	2	2	2	2	2	2	2	2	2	2	2	2	2	2	2	2	2	2	2
chr1:218099318-218100821	Gbeg-Ggod-Ggog-Ppa-Ptre-Ptrs-Ptrt-Ptrv	1503		0	2	0	0	2	3	0	0	0	0	0	0	0	3	0	0	0	2	0	0	0	0	0	2	0	0	0	2	0	3	0	2	0	0	0	0	0	0	0	0	0	0	0	3	0	0
chr1:220034723-220040657	fixed_Ggod	5934		2	2	2	2	2	2	1	2	2	2	2	2	1	3	1	0	2	2	2	1	2	2	1	2	2	2	2	1	2	2	0	2	1	0	2	1	2	2	2	2	2	1	2	2	2	2
chr1:222400778-222403151	fixed_Pab-Ppy	2373	FBXO28	1	0	2	2	0	0	2	2	1	2	1	2	2	2	2	2	2	0	2	1	2	2	2	0	2	2	2	0	2	0	1	0	2	2	2	1	2	2	2	2	2	2	2	2	2	2
chr1:223309591-223377723	fixed_Gbeg-Ggod-Ggog	68132	DNAH14	2	2	0	0	2	2	0	2	0	2	2	0	0	2	0	0	0	2	2	0	0	2	0	2	2	2	0	2	2	2	0	2	0	0	2	0	2	0	0	0	0	0	2	2	2	2
chr1:223406154-223627971	fixed_Gbeg-Ggod-Ggog	221817	DNAH14	2	2	0	0	2	2	0	2	0	2	2	0	0	2	0	0	0	2	2	0	0	2	0	2	2	2	0	2	2	2	0	2	0	0	2	0	2	0	0	0	0	0	2	2	2	2
chr1:225865963-225886017	Gbeg-Ggod-Ggog-Ppa-Ptre-Ptrs-Ptrt-Ptrv	20054	ZNF678	0	2	0	0	2	2	0	0	0	0	0	0	0	2	0	0	0	2	0	0	0	0	0	2	0	0	0	2	0	2	0	3	0	0	0	0	0	0	0	0	0	0	0	3	0	0
chr1:225929290-225966561	fixed_Ppa-Ptre-Ptrs-Ptrt-Ptrv	37271	ZNF847P	0	2	2	2	2	2	2	0	2	0	0	2	2	2	2	2	2	2	0	2	2	0	2	2	0	0	2	2	0	2	2	2	2	2	0	2	0	2	2	2	2	2	0	2	0	0
chr1:230466053-230472301	fixed_Ppa-Ptre-Ptrs-Ptrt-Ptrv	6248		0	2	2	2	2	2	2	0	2	0	0	2	2	2	2	2	2	2	0	2	2	0	2	2	0	0	2	2	0	2	3	2	2	2	0	2	0	2	2	2	2	2	0	2	0	0
chr1:234678643-234683837	fixed_Ppa	5194	EDARADD	2	2	2	2	2	2	2	0	2	2	2	2	2	3	2	2	2	2	0	2	2	2	2	2	2	2	2	2	2	2	2	2	2	2	0	2	2	2	2	2	2	2	0	3	0	0
chr1:236032429-236033766	fixed_Ggod	1337	RYR2	2	2	2	1	2	2	2	2	2	2	1	2	1	2	2	2	2	2	2	1	1	2	2	2	2	2	1	2	2	2	0	2	2	2	2	2	2	2	1	2	2	2	2	2	1	2
chr1:236278581-236282413	fixed_Ppa-Ptre-Ptrs-Ptrt-Ptrv	3832		0	2	2	2	2	2	3	0	2	0	0	2	1	2	2	2	2	2	0	2	2	0	2	2	0	0	2	2	0	2	2	2	2	2	0	2	0	2	2	2	2	2	0	2	0	0
chr1:236947520-236956851	fixed_Ppa-Ptre-Ptrs-Ptrt-Ptrv	9331		0	2	2	2	2	2	2	0	2	0	0	2	2	3	2	2	2	2	0	2	2	0	2	2	0	0	2	2	0	2	3	2	2	2	0	2	0	2	2	2	2	2	0	2	0	0
chr1:237416502-237422057	fixed_Gbeg-Ggod-Ggog	5555		2	2	0	0	2	2	0	2	0	2	2	0	0	2	0	0	0	1	2	0	0	2	0	2	2	2	0	2	2	2	0	2	0	0	2	0	2	0	0	0	0	0	2	2	2	2
chr1:238163135-238241876	fixed_Gbeg-Ggod-Ggog	78741	RPS7P5	2	2	0	0	2	2	0	2	0	2	2	0	0	2	0	0	0	2	2	0	0	2	0	2	2	2	0	2	2	2	0	2	0	0	2	0	2	0	0	0	0	0	2	2	2	2
chr1:238244002-238245266	fixed_Gbeg-Ggod-Ggog	1264		2	2	0	0	2	2	0	2	0	2	2	0	0	2	0	0	0	2	2	0	0	2	0	2	2	2	0	2	2	2	0	2	0	0	2	0	2	0	0	0	0	0	3	2	2	2
chr1:239188013-239189685	fixed_Pab-Ppy	1672	RGS7	2	0	2	2	0	0	2	2	2	2	2	2	2	2	2	2	2	0	2	2	2	2	2	0	2	2	2	0	2	0	2	0	2	2	2	2	2	2	2	2	2	2	2	2	2	2
chr1:241465805-241469300	fixed_Gbeg-Ggod-Ggog	3495	CEP170	2	2	0	0	1	2	0	2	0	2	2	0	0	2	0	0	0	2	2	0	0	2	0	2	2	2	0	2	2	2	0	2	0	0	2	0	2	0	0	0	0	0	2	2	2	2
chr1:241475134-241477133	fixed_Pab-Ppy	1999	CEP170	2	0	2	2	0	0	2	2	2	2	1	2	2	2	2	2	2	0	2	2	2	2	2	0	2	2	1	0	2	0	2	0	2	2	2	2	2	1	2	1	2	2	2	2	2	2
chr1:245326418-245327196	fixed_Pab-Ppy	778		1	0	2	3	0	0	2	2	3	2	2	2	1	2	2	3	2	0	2	2	2	2	2	0	2	2	2	0	2	0	2	0	3	2	2	2	2	2	2	2	2	2	2	2	2	2
chr1:245816305-245867127	fixed_Pab-Ppy	50822	OR2G2,OR2G3	2	0	2	2	0	0	2	2	2	2	2	2	2	2	2	2	2	0	2	2	2	2	2	0	2	2	2	0	2	0	2	0	2	2	2	2	2	2	2	2	2	2	2	2	2	2
chr1:246392969-246395571	fixed_Pab-Ppy	2602		2	0	3	2	0	0	2	3	3	3	2	2	2	3	2	2	3	0	3	2	2	3	2	0	2	2	2	0	4	0	2	0	2	3	3	2	2	3	2	2	2	2	3	3	3	3
chr1:246441246-246444301	fixed_Pab-Ppy	3055		2	0	2	2	0	0	2	2	2	2	2	2	2	2	2	2	2	0	2	2	2	2	2	0	2	2	2	0	2	0	2	0	2	2	2	2	2	2	2	2	2	2	2	2	2	2
chr1:246735727-246772005	fixed_Gbeg-Ggod-Ggog	36278	OR2G6	3	3	0	0	3	3	0	2	0	2	3	0	0	4	0	0	0	3	2	0	0	2	0	3	3	3	0	2	2	3	0	3	0	0	2	0	3	0	0	0	0	0	2	4	2	2
chr1:246820237-246831476	fixed_Ppa-Ptre-Ptrs-Ptrt-Ptrv	11239	OR2T10	0	1	4	4	1	1	4	0	4	0	0	4	4	2	4	3	3	1	0	4	4	0	4	1	0	0	4	1	0	1	4	1	4	4	0	4	0	4	4	4	4	4	0	3	0	0
chr1:246969834-246974972	fixed_Ppa	5138		1	2	2	2	2	2	2	0	2	1	2	2	2	2	2	2	2	2	0	2	2	2	2	2	2	1	2	2	1	2	2	2	2	2	0	2	1	2	2	2	2	2	0	2	0	0
chr10:541126-543623	fixed_Gbeg-Ggod-Ggog	2497	DIP2C	2	2	0	0	2	2	0	2	0	2	2	0	0	2	0	0	0	2	3	0	0	2	0	2	2	2	0	2	2	2	0	2	0	0	3	0	2	0	0	0	0	0	2	3	3	3
chr10:568374-571664	fixed_Pab-Ppy	3290	DIP2C	2	0	1	1	0	0	2	2	1	2	1	1	1	2	2	1	1	0	1	1	1	2	2	0	2	2	2	0	2	0	1	0	2	1	1	1	1	1	1	2	1	1	2	2	2	2
chr10:629634-634601	fixed_Gbeg-Ggod-Ggog	4967	DIP2C	2	1	0	0	1	1	0	2	0	2	2	0	0	2	0	0	0	1	2	0	0	2	0	1	2	2	0	1	2	1	0	1	0	0	2	0	2	0	0	0	0	0	2	2	2	2
chr10:1844622-1861866	fixed_Ppa-Ptre-Ptrs-Ptrt-Ptrv	17244		0	2	2	2	2	2	2	0	2	0	0	2	2	2	2	2	2	2	0	2	2	0	2	2	0	0	2	2	0	2	2	2	2	2	0	2	0	2	2	2	2	2	0	3	0	0
chr10:1943320-1944654	fixed_Ppa-Ptre-Ptrs-Ptrt-Ptrv	1334		0	2	2	2	2	2	2	0	2	0	0	2	2	2	2	2	2	2	0	2	2	0	2	2	0	0	2	2	0	2	2	2	2	2	0	2	0	2	2	2	2	2	0	2	0	0
chr10:1970466-1971703	fixed_Ppa-Ptre-Ptrs-Ptrt-Ptrv	1237		0	2	2	2	1	2	2	0	2	0	0	2	2	2	2	2	2	1	0	2	2	0	2	2	0	0	2	1	0	1	2	2	1	1	0	2	0	2	2	2	2	2	0	2	0	0
chr10:2333581-2337416	fixed_Ppa-Ptre-Ptrs-Ptrt-Ptrv	3835	LOC399708	0	2	2	2	2	2	2	0	2	0	0	2	2	2	2	2	2	1	0	2	2	0	2	2	0	0	2	2	0	2	2	2	2	2	0	2	0	2	2	2	2	2	0	2	0	0
chr10:2437265-2438557	fixed_Gbeg-Ggod-Ggog	1292		2	2	0	0	2	2	0	2	0	2	2	0	0	2	0	0	0	1	2	0	0	2	0	2	2	2	0	2	2	2	0	2	0	0	2	0	2	0	0	0	0	0	2	2	2	2
chr10:2638864-2642813	fixed_Pab-Ppy	3949		2	0	2	2	0	0	2	2	2	2	2	2	2	2	2	2	2	0	2	2	2	2	2	0	2	2	2	0	2	0	2	0	2	2	2	2	2	2	2	2	2	2	2	2	2	2
chr10:2905727-2907530	fixed_Ptre-Ptrs-Ptrt-Ptrv	1803		0	2	2	2	1	2	2	2	2	0	0	2	2	1	2	1	1	1	2	2	2	0	2	1	0	0	2	1	0	1	2	1	2	1	2	2	0	2	2	2	2	2	2	2	2	2
chr10:3025245-3047276	fixed_Ppa-Ptre-Ptrs-Ptrt-Ptrv	22031		0	2	2	2	2	2	2	0	2	0	0	2	2	2	2	2	2	2	0	2	2	0	2	2	0	0	2	2	0	2	2	2	2	2	0	2	0	2	2	2	2	2	0	2	0	0
chr10:3553163-3554445	fixed_Gbeg-Ggod-Ggog	1282		2	2	0	0	2	2	0	2	0	2	1	0	0	2	0	0	0	2	2	0	0	2	0	2	2	2	0	2	3	2	0	2	0	0	2	0	2	0	0	0	0	0	2	3	2	2
chr10:4149089-4152183	fixed_Ppa-Ptre-Ptrs-Ptrt-Ptrv	3094		0	2	2	2	2	2	2	0	2	0	0	2	2	2	2	1	2	2	0	2	1	0	2	1	0	0	2	2	0	1	2	2	2	2	0	2	0	2	2	1	2	2	0	2	0	0
chr10:4548920-4558164	fixed_Ppa-Ptre-Ptrs-Ptrt-Ptrv	9244		0	2	2	2	2	2	2	0	2	0	0	2	2	2	2	2	2	2	0	2	2	0	2	1	0	0	2	2	0	2	2	2	2	2	0	2	0	2	2	2	1	2	0	2	0	0
chr10:4850632-4851677	fixed_Pab-Ppy	1045		2	0	2	2	0	0	2	2	2	2	1	2	2	2	2	1	2	0	1	2	2	2	2	0	2	2	2	0	2	0	2	0	2	2	2	2	2	2	2	2	2	3	2	3	2	2
chr10:4915628-4923636	fixed_Gbeg-Ggod-Ggog	8008	TAKR	2	2	0	0	2	2	0	2	0	2	2	0	0	2	0	0	0	2	2	0	0	2	0	2	2	2	0	2	2	2	0	2	0	0	2	0	2	0	0	0	0	0	2	2	2	2
chr10:5515937-5519889	fixed_Ppa-Ptre-Ptrs-Ptrt-Ptrv	3952		0	1	3	2	1	1	2	0	2	0	0	2	2	2	2	2	2	1	0	2	2	0	2	1	0	0	1	1	0	2	2	1	1	2	0	2	0	2	2	2	2	1	0	2	0	0
chr10:7296387-7298985	fixed_Pab-Ppy	2598	SFMBT2	2	0	2	2	0	0	3	2	2	2	2	2	2	2	2	2	2	0	2	2	2	2	2	0	2	2	2	0	2	0	2	0	2	2	2	2	2	2	2	2	2	2	2	2	2	2
chr10:7376977-7380443	fixed_Pab-Ppy	3466	SFMBT2	2	0	2	2	0	0	2	2	2	2	2	2	2	2	2	2	2	0	2	2	2	2	2	0	2	2	2	0	3	0	2	0	2	2	2	2	2	2	2	2	2	2	2	3	2	2
chr10:8424090-8426970	fixed_Pab-Ppy	2880		2	0	2	2	0	0	2	2	2	2	2	2	2	2	2	2	2	0	2	2	2	2	2	0	2	2	2	0	2	0	2	0	2	2	2	2	2	2	2	2	2	2	2	3	2	2
chr10:9736561-9749510	fixed_Ppa	12949		2	2	2	2	2	2	2	0	2	2	2	2	2	2	2	2	1	2	0	2	2	2	2	2	2	1	2	2	2	2	2	2	2	2	0	2	2	2	2	2	2	2	0	2	0	0
chr10:9792007-9794104	fixed_Pab-Ppy	2097		2	0	2	2	0	0	2	2	2	2	2	2	2	2	2	2	2	0	2	2	2	2	2	0	2	1	1	0	2	0	2	0	2	2	2	2	2	2	2	1	2	2	2	2	2	2
chr10:10478408-10479116	fixed_Pab-Ppy	708		2	0	2	2	0	0	2	2	2	2	2	2	2	2	2	2	2	0	2	2	2	2	2	0	2	2	2	0	2	0	2	0	2	2	2	3	1	2	2	2	2	2	2	2	2	2
chr10:11674627-11677052	fixed_Pab-Ppy	2425	USP6NL	2	0	2	2	0	0	2	2	2	2	2	2	2	2	2	2	2	0	2	2	2	2	2	0	2	2	2	0	2	0	2	0	2	2	2	2	2	2	2	2	2	2	2	2	2	2
chr10:12827983-12834687	fixed_Ppa	6704	CAMK1D	2	2	2	2	2	1	2	0	2	2	2	2	2	2	2	2	2	2	0	2	2	2	2	2	2	2	2	2	2	2	2	2	1	2	0	2	2	2	2	2	2	2	0	2	0	0
chr10:15123928-15149226	fixed_Gbeg-Ggod-Ggog	25298	OLAH	2	2	0	0	2	2	0	2	0	2	2	0	0	2	0	0	0	1	2	0	0	2	0	2	2	2	0	2	2	2	0	2	0	0	2	0	2	0	0	0	0	0	2	2	2	2
chr10:17516801-17517644	fixed_Gbeg-Ggod-Ggog	843	ST8SIA6	2	2	0	0	1	2	0	2	0	2	2	0	0	2	0	0	0	2	2	0	0	2	0	2	2	2	0	2	2	2	0	2	0	0	2	0	2	0	0	0	0	0	2	2	2	2
chr10:19245328-19380515	fixed_Ppa-Ptre-Ptrs-Ptrt-Ptrv	135187		0	2	2	2	2	2	2	0	2	0	0	2	2	2	2	2	2	2	0	2	2	0	2	2	0	0	2	2	0	2	2	2	2	2	0	2	0	2	2	2	2	2	0	2	0	0
chr10:19382397-19416967	fixed_Ppa-Ptre-Ptrs-Ptrt-Ptrv	34570		0	2	1	2	2	2	2	0	2	0	0	2	2	2	2	2	2	2	0	2	2	0	2	2	0	0	2	2	0	2	2	2	2	2	0	2	0	2	2	2	2	2	0	2	0	0
chr10:19739220-19745166	fixed_Pab-Ppy	5946		2	0	2	2	0	0	2	2	2	2	2	2	2	2	2	2	2	0	2	2	2	2	2	0	2	2	2	0	2	0	2	0	2	2	2	3	2	2	2	2	2	2	2	2	2	2
chr10:22259978-22267021	fixed_Gbeg-Ggod-Ggog	7043	DNAJC1	2	2	0	0	2	2	0	2	0	2	2	0	0	2	0	0	0	1	2	0	0	2	0	1	2	2	0	2	3	2	0	2	0	0	2	0	1	0	0	0	0	0	2	2	2	2
chr10:25572976-25573678	fixed_Hde	702	GPR158	2	2	1	2	2	2	2	2	2	2	1	2	2	2	2	2	3	2	2	2	2	2	2	2	2	2	2	2	2	3	2	2	2	2	2	2	2	2	2	2	2	2	2	2	2	3
chr10:25936444-25936944	fixed_Pab-Ppy	500		2	0	1	2	0	0	3	1	1	2	2	2	2	2	2	2	2	0	2	2	2	1	2	0	2	2	2	0	2	0	2	0	2	2	2	2	2	2	2	2	1	1	2	2	1	2
chr10:26116308-26121225	fixed_Gbeg-Ggod-Ggog	4917		2	2	0	0	2	2	0	2	0	2	2	0	0	2	0	0	0	2	2	0	0	2	0	2	2	2	0	2	2	2	0	2	0	0	2	0	2	0	0	0	0	0	2	2	2	2
chr10:27130664-27133437	fixed_Ppa-Ptre-Ptrs-Ptrt-Ptrv	2773	ABI1	0	2	2	2	2	2	2	0	3	0	0	2	2	2	2	2	2	2	0	2	2	0	2	2	0	0	2	2	0	2	2	2	2	2	0	2	0	2	2	2	2	2	0	3	0	0
chr10:29260198-29263303	fixed_Ppa-Ptre-Ptrs-Ptrt-Ptrv	3105		0	2	2	2	2	2	2	0	2	0	0	2	2	2	2	2	1	2	0	2	2	0	2	2	0	0	2	2	0	2	2	2	2	2	0	2	0	2	2	2	2	2	0	2	0	0
chr10:29443072-29443572	fixed_Ppa-Ptre-Ptrs-Ptrt-Ptrv	500		0	3	2	2	2	2	2	0	2	0	0	2	2	2	2	3	2	2	0	2	2	0	2	2	0	0	2	2	0	2	2	2	2	2	0	2	0	3	2	2	2	2	0	3	0	0
chr10:36455525-36464873	fixed_Hde	9348		2	2	2	2	2	2	2	2	2	2	2	2	2	2	2	2	2	2	2	2	2	2	2	2	2	2	2	2	2	2	2	2	2	2	2	2	2	2	2	2	2	2	2	2	2	2
chr10:37202893-37207897	fixed_Ppa-Ptre-Ptrs-Ptrt-Ptrv	5004		0	2	2	2	2	2	2	0	2	0	0	2	2	2	2	2	2	2	0	2	2	0	2	2	0	0	2	2	0	2	2	2	2	2	0	2	0	2	2	2	2	2	0	2	0	0
chr10:37472199-37655299	fixed_Pab-Ppy	183100	ANKRD30A	3	0	2	3	0	0	3	3	3	3	2	3	2	3	3	2	2	0	2	3	2	3	2	0	3	3	2	0	3	0	3	0	3	3	2	3	3	3	3	3	3	3	3	3	2	3
chr10:37677163-37704129	fixed_Pab-Ppy	26966		2	0	2	2	0	0	2	2	2	2	2	2	2	2	2	1	2	0	2	2	2	2	2	0	2	2	2	0	2	0	2	0	2	2	2	2	2	2	2	2	2	2	2	2	2	2
chr10:38061934-38080765	fixed_Gbeg-Ggod-Ggog	18831		2	2	0	0	3	2	0	2	0	2	2	0	0	2	0	0	0	2	2	0	0	2	0	2	2	2	0	3	2	3	0	2	0	0	2	0	2	0	0	0	0	0	2	2	2	2
chr10:38093806-38106322	fixed_Ppa-Ptre-Ptrs-Ptrt-Ptrv	12516	ZNF248	0	2	2	2	2	2	2	0	2	0	0	2	2	2	2	2	2	2	0	2	2	0	2	2	0	0	2	3	0	3	2	2	2	2	0	2	0	2	2	2	2	2	0	2	0	0
chr10:44132564-44133572	fixed_Pab-Ppy	1008		2	0	2	2	0	0	2	2	2	2	1	2	2	2	2	2	2	0	2	2	2	2	2	0	2	2	2	0	2	0	2	0	2	2	2	2	2	2	2	2	2	2	2	2	1	2
chr10:45072236-45089452	fixed_Gbeg-Ggod-Ggog	17216		2	2	0	0	2	2	0	2	0	2	2	0	0	3	0	0	0	2	2	0	0	2	0	2	2	2	0	2	2	2	0	2	0	0	2	0	2	0	0	0	0	0	2	2	2	2
chr10:47066206-47069638	fixed_Ppa-Ptre-Ptrs-Ptrt-Ptrv	3432		0	3	4	5	3	3	4	0	4	0	0	4	3	1	4	4	4	3	0	4	4	0	4	3	0	0	4	3	0	3	4	3	3	4	0	4	0	5	4	4	4	4	0	2	0	0
chr10:52775971-52776971	fixed_Ppa-Ptre-Ptrs-Ptrt-Ptrv	1000	PRKG1	0	2	2	2	2	2	2	0	2	0	0	2	2	2	2	2	2	2	0	2	2	0	2	2	0	0	1	1	0	2	2	2	2	2	0	2	0	2	2	2	2	2	0	3	0	0
chr10:53477064-53477672	fixed_Ppa-Ptre-Ptrs-Ptrt-Ptrv	608	PRKG1	0	2	2	2	2	2	3	0	2	0	0	2	2	2	2	2	2	2	0	3	2	0	2	2	0	0	2	2	0	2	2	2	2	2	0	3	0	2	2	2	2	2	0	2	0	0
chr10:54487953-54503027	fixed_Hde	15074		2	2	2	2	2	2	2	2	2	2	2	2	2	2	2	2	2	2	2	2	2	2	2	2	2	2	2	2	2	2	2	2	2	2	2	2	2	2	2	2	2	2	2	2	2	2
chr10:54777251-54777915	fixed_Gbeg-Ggod-Ggog	664		2	2	0	0	2	2	0	2	0	2	2	0	0	2	0	0	0	2	2	0	0	2	0	2	2	1	0	2	2	2	0	2	0	0	2	0	2	0	0	0	0	0	1	2	2	2
chr10:54887159-54899148	fixed_Pab-Ppy	11989		2	0	2	2	0	0	2	2	2	2	2	2	2	2	2	2	2	0	2	2	2	2	2	0	2	2	2	0	2	0	2	0	2	2	2	2	2	2	2	2	2	2	2	2	2	2
chr10:54899148-54911775	Gbeg-Ggod-Ggog-Pab-Ppy	12627		2	0	0	0	0	0	0	2	0	2	1	0	0	2	0	0	0	0	2	0	0	2	0	0	2	2	0	0	2	0	0	0	0	0	2	0	1	0	0	0	0	0	2	2	2	2
chr10:55085675-55088192	fixed_Gbeg-Ggod-Ggog	2517		1	1	0	0	2	1	0	2	0	1	1	0	0	2	0	0	0	1	2	0	0	2	0	1	2	2	0	2	2	1	0	2	0	0	2	0	2	0	0	0	0	0	1	2	1	2
chr10:55212132-55213876	fixed_Pab-Ppy	1744		2	0	2	2	0	0	2	1	2	2	1	2	2	2	2	1	2	0	1	2	2	1	2	0	2	2	2	0	2	0	2	0	2	2	1	2	2	2	2	2	2	2	2	2	2	2
chr10:55218952-55221565	fixed_Ptrt	2613		2	2	2	2	2	2	2	2	2	2	1	2	2	2	2	2	2	2	2	2	2	2	2	2	2	2	2	2	0	2	2	2	2	2	2	2	2	2	2	2	2	2	2	2	2	2
chr10:55437655-55438256	fixed_Ggod	601	PCDH15	2	1	2	2	2	2	2	1	2	2	2	2	1	2	2	2	2	1	2	2	1	1	2	1	2	2	1	2	2	1	0	2	2	2	1	2	2	1	2	2	2	2	2	2	2	2
chr10:56030409-56038481	fixed_Pab-Ppy	8072	PCDH15	2	0	2	2	0	0	3	2	2	2	2	2	1	2	2	2	1	0	2	2	2	2	2	0	2	2	2	0	2	0	2	0	2	2	2	2	3	2	2	1	2	2	1	2	2	2
chr10:56066444-56070129	fixed_Ppa	3685	PCDH15	2	2	2	2	1	2	2	0	2	2	2	2	2	2	2	1	2	1	0	2	2	2	2	1	2	2	1	1	2	1	2	2	2	2	0	2	1	2	2	2	2	2	0	2	0	0
chr10:56571789-56579287	fixed_Ppa-Ptre-Ptrs-Ptrt-Ptrv	7498		0	2	1	2	2	2	2	0	2	0	0	2	2	2	2	1	2	2	0	2	2	0	2	2	0	0	2	2	0	2	2	2	2	2	0	2	0	2	2	2	2	2	0	2	0	0
chr10:56623282-56627256	fixed_Pab-Ppy	3974		2	0	2	2	0	0	2	2	2	2	1	2	2	2	2	1	2	0	2	2	2	2	2	0	1	2	2	0	2	0	2	0	2	2	2	2	1	2	2	2	2	2	2	2	2	2
chr10:56724598-56743631	fixed_Ppa-Ptre-Ptrs-Ptrt-Ptrv	19033		0	2	2	2	2	2	2	0	2	0	0	2	2	2	2	2	2	2	0	2	2	0	2	2	0	0	2	2	0	2	2	2	2	2	0	2	0	2	2	2	2	2	0	2	0	0
chr10:56743631-56757460	Gbeg-Ggod-Ggog-Ppa-Ptre-Ptrs-Ptrt-Ptrv	13829		0	2	0	0	2	2	0	0	0	0	0	0	0	2	0	0	0	2	0	0	0	0	0	2	0	0	0	2	0	2	0	2	0	0	0	0	0	0	0	0	0	0	0	2	0	0
chr10:56757460-56759508	fixed_Ppa-Ptre-Ptrs-Ptrt-Ptrv	2048		0	2	2	2	2	2	2	0	2	0	0	2	2	2	2	2	2	2	0	2	1	0	3	2	0	0	1	2	0	2	2	2	2	2	0	2	0	2	2	2	2	2	0	3	0	0
chr10:57286115-57286886	fixed_Ppa-Ptre-Ptrs-Ptrt-Ptrv	771		0	2	2	2	2	2	3	0	2	0	0	2	2	2	2	1	2	2	0	2	2	0	2	2	0	0	2	2	0	2	3	2	2	2	0	2	0	2	2	2	2	2	0	2	0	0
chr10:57344382-57347132	fixed_Gbeg-Ggod-Ggog	2750		2	2	0	0	2	3	0	2	0	2	2	0	0	2	0	0	0	2	2	0	0	2	0	2	2	2	0	2	2	2	0	2	0	0	2	0	1	0	0	0	0	0	3	2	2	2
chr10:57355456-57358612	fixed_Pab-Ppy	3156		2	0	2	2	0	0	2	2	2	2	2	2	2	2	2	2	2	0	2	2	2	2	2	0	2	2	2	0	2	0	2	0	2	2	2	2	2	2	2	2	2	2	2	2	2	2
chr10:57436098-57438762	fixed_Gbeg-Ggod-Ggog	2664		2	2	0	0	2	2	0	2	0	1	2	0	0	2	0	0	0	2	2	0	0	2	0	2	2	2	0	2	2	2	0	2	0	0	2	0	2	0	0	0	0	0	2	3	2	2
chr10:57466414-57471020	fixed_Pab-Ppy	4606		2	0	2	2	0	0	2	2	2	1	2	2	2	2	2	2	2	0	2	2	2	2	2	0	2	2	2	0	2	0	2	0	2	2	2	2	2	2	2	2	2	2	2	2	2	2
chr10:57591591-57592455	fixed_Pab-Ppy	864		1	0	2	2	0	0	1	2	2	2	1	2	1	2	1	2	2	0	2	2	1	2	2	0	2	2	2	0	2	0	2	0	1	2	2	2	1	2	2	1	2	2	2	2	2	2
chr10:57635203-57636517	fixed_Pab-Ppy	1314		2	0	1	2	0	0	2	2	2	2	2	2	2	2	2	2	1	0	2	2	2	2	2	0	3	2	2	0	1	0	2	0	2	2	2	2	2	2	2	2	2	2	2	2	2	2
chr10:58019772-58023343	fixed_Ppa	3571		2	2	2	2	2	2	2	0	2	2	2	2	2	2	2	1	1	2	0	2	2	2	2	2	2	2	2	2	1	1	2	2	2	1	0	2	1	2	2	2	2	1	0	2	0	0
chr10:58106278-58121535	fixed_Gbeg-Ggod-Ggog	15257		2	2	0	0	2	2	0	2	0	2	2	0	0	2	0	0	0	2	2	0	0	2	0	2	2	2	0	2	2	2	0	2	0	0	2	0	2	0	0	0	0	0	2	2	2	2
chr10:58167678-58170059	fixed_Gbeg-Ggod-Ggog	2381		2	2	0	0	2	2	0	2	0	2	1	0	0	2	0	0	0	2	2	0	0	2	0	2	2	2	0	2	1	2	0	2	0	0	2	0	2	0	0	0	0	0	2	2	2	2
chr10:58170059-58183804	Gbeg-Ggod-Ggog-Pab-Ppy	13745		2	0	0	0	0	0	0	2	0	2	2	0	0	2	0	0	0	0	2	0	0	2	0	0	2	2	0	0	2	0	0	0	0	0	2	0	2	0	0	0	0	0	2	2	2	2
chr10:58204985-58207965	fixed_Pab-Ppy	2980		2	0	1	2	0	0	2	2	1	2	2	2	2	2	2	2	2	0	2	2	2	2	2	0	2	2	2	0	1	0	2	0	2	2	2	2	2	2	2	2	2	2	2	2	2	2
chr10:58290069-58355425	Gbeg-Ggod-Ggog-Ppa-Ptre-Ptrs-Ptrt-Ptrv	65356		0	2	0	0	2	2	0	0	0	0	0	0	0	2	0	0	0	2	0	0	0	0	0	2	0	0	0	2	0	2	0	2	0	0	0	0	0	0	0	0	0	0	0	2	0	0
chr10:58380122-58384870	fixed_Ppa-Ptre-Ptrs-Ptrt-Ptrv	4748		0	2	2	2	2	2	2	0	2	0	0	2	2	2	2	2	2	2	0	2	2	0	2	2	0	0	2	2	0	2	2	2	2	2	0	2	0	2	2	2	2	2	0	2	0	0
chr10:58633417-58639479	fixed_Pab-Ppy	6062		2	0	2	2	0	0	2	2	2	2	2	2	2	2	2	2	2	0	2	2	2	2	2	0	2	2	2	0	2	0	2	0	2	2	2	2	2	2	2	2	2	2	2	2	2	2
chr10:58799796-58806279	fixed_Gbeg-Ggod-Ggog	6483		2	2	0	0	2	2	0	2	0	2	2	0	0	2	0	0	0	2	2	0	0	2	0	2	2	2	0	2	2	2	0	2	0	0	2	0	2	0	0	0	0	0	2	2	2	2
chr10:58808322-58813771	fixed_Pab-Ppy	5449		2	0	2	2	0	0	2	2	2	2	2	2	2	2	2	2	2	0	2	2	2	2	2	0	2	2	2	0	2	0	2	0	2	2	2	2	2	2	2	2	2	2	2	3	2	2
chr10:58859109-58888975	fixed_Ppa-Ptre-Ptrs-Ptrt-Ptrv	29866		0	2	2	2	2	2	2	0	2	0	0	2	2	2	2	2	2	2	0	2	2	0	2	2	0	0	2	2	0	2	2	2	2	2	0	2	0	2	2	2	2	2	0	2	0	0
chr10:59127144-59130874	fixed_Pab-Ppy	3730		2	0	2	2	0	0	2	2	2	2	1	2	2	2	2	1	2	0	2	2	2	2	2	0	2	2	2	0	2	0	2	0	2	2	2	2	1	2	2	2	2	2	2	2	2	2
chr10:59171814-59177583	fixed_Gbeg-Ggod-Ggog	5769		2	2	0	0	1	2	0	2	0	2	2	0	0	2	0	0	0	2	2	0	0	2	0	2	2	2	0	2	2	2	0	2	0	0	2	0	2	0	0	0	0	0	2	2	2	2
chr10:61097746-61099867	fixed_Ppa-Ptre-Ptrs-Ptrt-Ptrv	2121	SLC16A9	0	2	2	1	1	2	2	0	2	0	0	2	2	2	2	2	2	2	0	2	2	0	2	1	0	0	2	1	0	1	2	2	2	2	0	2	0	2	2	2	2	2	0	3	0	0
chr10:62272053-62275466	fixed_Gbeg-Ggod-Ggog	3413		2	1	0	0	2	1	0	2	0	2	2	0	0	2	0	0	0	2	2	0	0	1	0	2	2	2	0	2	2	2	0	1	0	0	2	0	2	0	0	0	0	0	2	3	2	2
chr10:63528788-63530086	fixed_Ppy	1298		2	2	2	2	0	2	2	2	1	2	1	2	2	2	2	2	2	0	2	2	2	2	2	0	2	2	2	0	2	0	2	2	2	2	2	2	2	2	2	2	1	1	2	2	2	2
chr10:66207664-66209306	fixed_Pab-Ppy	1642		2	0	2	2	0	0	3	2	2	2	2	2	2	2	2	2	2	0	2	2	2	2	2	0	2	2	2	0	2	0	2	0	2	2	2	2	2	2	2	2	2	2	3	2	2	2
chr10:66506767-66527818	fixed_Ppa-Ptre-Ptrs-Ptrt-Ptrv	21051		0	2	2	2	2	2	2	0	2	0	0	2	2	2	2	2	2	2	0	2	2	0	2	2	0	0	2	2	0	1	2	2	2	2	0	2	0	2	2	2	2	2	0	2	0	0
chr10:66636380-66640884	fixed_Gbeg-Ggod-Ggog	4504		2	1	0	0	1	2	0	2	0	2	2	0	0	2	0	0	0	1	2	0	0	2	0	1	2	2	0	2	2	1	0	2	0	0	2	0	2	0	0	0	0	0	2	2	2	2
chr10:66653310-66655199	fixed_Pab-Ppy	1889		2	0	2	2	0	0	2	2	2	2	2	2	2	2	2	2	2	0	2	2	2	2	2	0	2	2	2	0	2	0	2	0	2	2	2	2	2	2	2	2	2	2	2	2	2	2
chr10:66660843-66661436	fixed_Gbeg	593		2	3	2	2	2	2	2	2	1	2	1	1	2	2	2	2	2	2	2	2	1	2	0	2	2	2	1	2	2	2	2	2	2	2	2	3	2	2	2	2	1	1	2	2	2	2
chr10:67350338-67354945	fixed_Gbeg-Ggod-Ggog	4607	CTNNA3	2	2	0	0	2	2	0	2	0	2	1	0	0	2	0	0	0	2	2	0	0	2	0	2	2	2	0	1	2	2	0	2	0	0	2	0	2	0	0	0	0	0	2	2	2	2
chr10:67370303-67371973	fixed_Ppa-Ptre-Ptrs-Ptrt-Ptrv	1670	CTNNA3	0	2	2	2	2	2	2	0	2	0	0	2	2	2	2	2	2	2	0	2	2	0	2	1	0	0	2	1	0	2	2	1	2	2	0	2	0	2	2	2	2	2	0	2	0	0
chr10:67404870-67406308	fixed_Gbeg-Ggod-Ggog	1438	CTNNA3	2	2	0	0	2	2	0	2	0	2	2	0	0	3	0	0	0	2	2	0	0	2	0	2	2	2	0	2	2	2	0	3	0	0	2	0	2	0	0	0	0	0	2	2	2	2
chr10:67776782-67778822	fixed_Pab-Ppy	2040	CTNNA3	2	0	1	2	0	0	2	2	1	1	1	2	1	2	2	1	2	0	2	1	1	2	1	0	2	2	2	0	2	0	1	0	2	2	2	1	2	1	2	1	1	1	1	2	2	2
chr10:68086793-68094009	fixed_Ptrv	7216	CTNNA3	0	2	2	2	2	2	2	2	2	2	2	2	2	2	2	2	2	2	2	2	2	2	2	1	0	2	2	2	2	2	2	2	2	2	2	2	2	2	2	2	2	2	2	2	2	2
chr10:68521398-68525258	fixed_Gbeg-Ggod-Ggog	3860	CTNNA3,LRRTM3	2	2	0	0	2	2	0	2	0	2	2	0	0	2	0	0	0	2	2	0	0	2	0	1	2	2	0	2	2	2	0	2	0	0	2	0	1	0	0	0	0	0	2	2	2	2
chr10:68537290-68539918	fixed_Gbeg-Ggod-Ggog	2628	CTNNA3	2	2	0	0	2	2	0	2	0	2	1	0	0	2	0	0	0	2	2	0	0	2	0	2	2	2	0	2	2	2	0	2	0	0	2	0	2	0	0	0	0	0	2	2	2	2
chr10:68705790-68711397	fixed_Gbeg-Ggod-Ggog	5607	CTNNA3	2	2	0	0	2	2	0	2	0	2	1	0	0	2	0	0	0	2	2	0	0	2	0	2	2	2	0	2	2	2	0	2	0	0	2	0	2	0	0	0	0	0	2	2	2	2
chr10:70284460-70290508	fixed_Ppa	6048	STOX1	2	2	2	2	2	2	2	0	2	2	2	2	2	2	2	2	2	2	0	2	2	2	2	2	2	2	2	2	2	2	2	2	2	2	0	2	2	3	2	2	2	2	0	3	0	0
chr10:73320346-73321688	fixed_Pab-Ppy	1342		1	0	2	2	0	0	2	2	2	2	2	2	1	2	2	2	1	0	2	2	2	2	2	0	2	2	2	0	2	0	3	0	1	2	2	2	2	2	2	2	2	1	2	2	2	2
chr10:73983366-73988303	fixed_Pab-Ppy	4937	MICU1	2	0	2	2	0	0	2	2	2	2	2	2	2	2	2	2	2	0	2	2	2	2	2	0	2	2	2	0	2	0	2	0	2	2	2	2	2	2	2	2	2	2	2	2	2	2
chr10:74216682-74221179	fixed_Gbeg-Ggod-Ggog	4497	MCU	2	2	0	0	2	3	0	2	0	2	2	0	0	2	0	0	0	2	2	0	0	2	0	2	2	2	0	2	2	2	0	2	0	0	2	0	2	0	0	0	0	0	2	3	2	2
chr10:75040701-75046662	fixed_Pab-Ppy	5961		2	0	2	1	0	0	1	2	1	1	1	2	2	3	1	2	1	0	2	2	2	2	2	0	1	2	1	0	2	0	2	0	2	2	2	2	2	2	2	1	2	2	2	2	2	2
chr10:76415473-76416784	fixed_Ptre-Ptrv	1311	KAT6B	0	2	2	2	2	2	2	2	2	0	1	2	2	2	2	2	2	2	2	2	2	0	2	2	0	0	1	2	1	2	1	2	2	2	2	2	2	2	2	2	2	2	2	3	2	2
chr10:77411207-77413110	fixed_Pab-Ppy	1903	C10orf11	2	0	2	2	0	0	2	2	2	2	2	2	2	2	2	2	2	0	2	2	2	2	2	0	3	2	2	0	2	0	2	0	2	2	3	2	2	2	2	3	2	2	2	2	2	2
chr10:82125366-82137749	fixed_Ppa-Ptre-Ptrs-Ptrt-Ptrv	12383		0	2	2	2	2	2	2	0	2	0	0	2	2	2	2	3	2	2	0	2	2	0	2	2	0	0	2	2	0	2	2	2	2	2	0	2	0	2	2	2	2	2	0	2	0	0
chr10:83071179-83075222	fixed_Gbeg-Ggod-Ggog	4043		2	2	0	0	2	2	0	2	0	2	2	0	0	2	0	0	0	1	2	0	0	2	0	2	1	2	0	1	3	2	0	2	0	0	2	0	1	0	0	0	0	0	1	3	2	2
chr10:83178393-83179008	fixed_Pab-Ppy	615		2	0	2	2	0	0	3	2	2	2	1	2	2	2	2	2	2	0	2	2	2	2	2	0	2	2	2	0	2	0	2	0	2	2	2	2	2	2	2	2	2	2	2	2	2	2
chr10:83857683-83859049	fixed_Pab-Ppy	1366	NRG3	2	0	2	2	0	0	2	2	2	2	2	2	2	2	2	2	2	0	2	2	2	2	2	0	2	2	2	0	2	0	2	0	2	2	2	2	2	2	2	2	2	2	2	2	2	2
chr10:84905014-84909203	fixed_Pab-Ppy	4189		2	0	2	2	0	0	2	2	2	2	2	2	2	2	2	2	2	0	2	2	2	2	2	0	2	2	2	0	2	0	2	0	2	2	2	2	2	2	2	2	2	2	2	2	2	2
chr10:85331668-85347381	fixed_Gbeg-Ggod-Ggog	15713		2	2	0	0	2	2	0	2	0	2	1	0	0	2	0	0	0	2	2	0	0	2	0	2	2	2	0	2	2	2	0	2	0	0	2	0	2	0	0	0	0	0	2	2	2	2
chr10:85805777-85814307	fixed_Pab-Ppy	8530		2	0	2	2	0	1	2	2	2	2	2	2	2	2	2	2	2	0	2	2	2	2	2	0	2	2	2	0	2	0	2	0	2	2	2	2	2	2	2	2	2	2	2	2	2	2
chr10:87947439-87949420	fixed_Pab-Ppy	1981	GRID1	2	0	2	2	0	0	2	2	2	2	2	2	2	2	2	2	2	0	2	2	2	2	2	0	2	2	2	0	2	0	2	0	2	2	2	3	2	2	2	2	2	3	2	2	2	2
chr10:89031887-89033492	fixed_Pab-Ppy	1605	LOC728190	6	0	4	4	0	0	4	5	4	6	5	4	4	6	4	4	3	0	6	3	4	6	4	0	6	6	4	0	5	0	5	0	4	4	4	4	3	4	4	4	4	4	5	8	5	5
chr10:90712179-90713227	fixed_Pab-Ppy	1048	ACTA2	2	0	1	2	0	0	2	1	1	2	2	2	2	2	1	1	2	0	1	1	1	2	1	0	2	2	2	0	1	0	2	0	1	1	1	2	2	1	1	2	2	1	2	2	1	2
chr10:90825542-90829186	fixed_Pab-Ppy	3644		2	0	2	2	0	0	2	2	2	2	2	2	2	3	2	2	2	0	2	2	2	2	2	0	2	2	2	0	2	0	2	0	2	2	2	2	2	2	2	2	2	2	2	2	2	2
chr10:91010860-91025770	fixed_Pab-Ppy	14910		2	0	2	2	0	0	2	2	2	2	2	2	2	2	2	2	2	0	2	2	2	2	2	0	2	2	2	0	2	0	2	0	2	2	2	2	2	2	2	2	2	2	2	2	2	2
chr10:91556739-91559395	fixed_Pab-Ppy	2656		2	0	2	2	0	0	2	3	2	2	2	2	2	3	2	2	2	0	2	2	2	2	2	0	2	2	2	0	2	0	2	0	2	2	2	2	2	2	2	2	2	2	2	2	2	2
chr10:95221705-95223235	fixed_Pab-Ppy	1530	MYOF	2	0	2	2	0	0	1	2	2	2	2	2	2	2	2	2	2	0	2	2	2	2	2	0	2	2	2	0	2	0	2	0	2	2	2	2	2	2	2	2	2	2	2	2	2	2
chr10:95311971-95316790	fixed_Pab-Ppy	4819	O3FAR1	2	0	2	2	0	0	2	2	2	2	2	2	2	2	1	2	2	0	2	2	2	2	1	0	2	2	2	0	2	0	2	0	2	2	2	2	2	2	2	2	2	2	2	2	2	2
chr10:95817776-95822785	fixed_Gbeg-Ggod-Ggog	5009	PLCE1	2	2	0	0	2	2	0	2	0	2	2	0	0	2	0	0	0	2	2	0	0	2	0	2	2	2	0	2	2	2	0	2	0	0	2	0	2	0	0	0	0	0	2	2	2	2
chr10:96439989-96444808	Ppa-Ptre-Ptrs-Ptrt-Ptrv-Pab-Ppy	4819	CYP2C18	0	0	2	2	0	0	2	0	2	0	0	2	2	2	2	2	2	0	0	2	2	0	2	0	0	0	2	0	0	0	2	0	2	2	0	2	0	2	2	2	2	2	0	2	0	0
chr10:96444808-96478727	fixed_Ppa-Ptre-Ptrs-Ptrt-Ptrv	33919	CYP2C18	0	2	2	2	2	2	2	0	2	0	0	2	2	2	2	2	2	2	0	2	2	0	2	2	0	0	2	2	0	2	2	2	2	2	0	2	0	2	2	2	2	2	0	3	0	0
chr10:96483192-96486046	fixed_Ppa-Ptre-Ptrs-Ptrt-Ptrv	2854	CYP2C18	0	2	2	2	2	2	2	0	2	0	0	2	2	3	2	2	2	2	0	2	2	0	2	2	0	0	2	2	0	2	3	2	2	2	0	2	0	2	3	2	2	2	0	3	0	0
chr10:96893062-96910181	Gbeg-Ggod-Ggog-Pab-Ppy	17119		2	0	0	0	0	0	0	2	0	2	1	0	0	2	0	0	0	0	2	0	0	2	0	0	1	2	0	0	2	0	0	0	0	0	2	0	2	0	0	0	0	0	2	3	2	2
chr10:100490446-100491388	fixed_Pab-Ppy	942	HPSE2	2	0	2	2	0	0	2	2	1	2	1	2	1	2	2	2	1	0	2	1	1	2	2	0	2	2	1	0	2	0	1	0	2	1	2	2	1	2	2	1	2	1	2	2	2	2
chr10:106055658-106058561	fixed_Ptrv	2903		0	3	2	2	3	3	2	2	2	2	2	2	2	2	2	2	2	2	2	2	2	2	2	2	0	2	2	2	2	3	2	3	2	2	2	2	2	2	2	2	2	2	2	2	2	2
chr10:107492558-107495129	fixed_Hde	2571		2	2	1	2	2	2	2	2	2	2	2	2	2	2	2	2	2	1	2	2	1	2	2	1	2	2	2	2	1	1	2	2	2	2	2	2	2	2	2	2	2	2	2	2	2	2
chr10:108243916-108245462	fixed_Pab-Ppy	1546		2	0	2	2	0	0	2	2	2	2	2	2	2	2	2	2	2	0	2	2	2	2	2	0	2	2	2	0	1	0	2	0	2	2	2	2	2	2	2	2	2	2	2	2	2	2
chr10:109737431-109741584	fixed_Gbeg-Ggod-Ggog	4153		2	2	0	0	2	1	0	1	0	2	2	0	0	2	0	0	0	2	2	0	0	2	0	1	2	2	0	1	2	2	0	1	0	0	2	0	2	0	0	0	0	0	2	2	2	2
chr10:110983856-110985802	fixed_Gbeg-Ggod-Ggog	1946	RNU6-53	2	2	0	0	2	2	0	2	0	2	2	0	0	3	0	0	0	2	2	0	0	2	0	2	2	2	0	2	2	2	0	2	0	0	2	0	2	0	0	0	0	0	2	2	2	2
chr10:111265887-111270668	fixed_Pab-Ppy	4781		2	0	2	2	0	0	2	2	2	2	1	2	2	2	2	2	2	0	2	2	2	2	2	0	2	2	3	0	2	0	2	0	2	2	2	2	2	2	2	2	2	2	2	2	2	2
chr10:113946631-113947131	fixed_Ppa-Ptre-Ptrs-Ptrt-Ptrv	500		0	2	2	2	2	2	2	0	2	0	0	1	2	3	1	1	2	2	0	2	2	0	2	2	0	0	2	2	0	2	2	2	2	2	0	1	0	2	1	2	1	1	0	3	0	0
chr10:117433191-117435731	fixed_Pab-Ppy	2540	ATRNL1	2	0	1	2	0	0	2	2	2	2	2	2	2	2	2	1	1	0	2	2	2	2	2	0	1	2	1	0	2	0	2	0	2	2	2	2	2	2	2	2	2	2	2	2	2	2
chr10:117518546-117521399	fixed_Pab-Ppy	2853	ATRNL1	2	0	2	2	0	0	2	2	2	2	2	2	2	2	2	2	2	0	2	2	2	2	2	0	2	2	2	0	2	0	2	0	2	2	2	2	2	2	2	3	2	2	2	2	2	2
chr10:117827482-117829342	fixed_Pab-Ppy	1860	GFRA1	2	0	2	2	0	0	2	2	2	2	2	2	2	2	2	2	2	0	2	2	2	2	2	0	2	2	2	0	2	0	2	0	2	2	2	2	2	2	2	2	2	2	2	2	2	2
chr10:118351283-118359885	Gbeg-Ggod-Ggog-Ppa-Ptre-Ptrs-Ptrt-Ptrv	8602	PNLIPRP1	0	2	0	0	2	2	0	0	0	0	0	0	0	2	0	0	0	2	0	0	0	0	0	2	0	0	0	2	0	2	0	2	0	0	0	0	0	0	0	0	0	0	0	2	0	0
chr10:118756282-118757907	fixed_Pab-Ppy	1625	KIAA1598	2	0	2	2	0	0	2	1	1	2	1	2	1	2	2	1	2	0	1	2	1	2	2	0	1	1	2	0	2	0	2	0	2	2	1	2	1	2	2	2	2	2	1	3	1	2
chr10:119564380-119566803	fixed_Ppa-Ptre-Ptrs-Ptrt-Ptrv	2423		0	2	2	3	2	2	2	0	2	0	0	1	2	3	2	2	2	2	0	2	2	0	2	2	0	0	2	2	0	2	2	2	2	2	0	2	0	2	2	2	2	2	0	2	0	0
chr10:121729183-121731555	fixed_Hde	2372		2	2	2	2	2	2	1	2	2	2	2	2	2	2	2	1	2	2	2	2	2	2	2	2	2	2	2	2	2	2	2	3	2	2	2	2	2	2	2	1	2	2	2	2	2	2
chr10:123226402-123226902	fixed_Ppa-Ptre-Ptrs-Ptrt-Ptrv	500		0	2	2	2	1	2	2	0	2	0	0	3	2	1	2	2	2	1	0	2	2	0	2	2	0	0	2	2	0	2	2	2	2	2	0	1	0	2	2	2	2	2	0	2	0	0
chr10:123401175-123404560	fixed_Gbeg-Ggod-Ggog	3385		2	2	0	0	2	2	0	2	0	2	2	0	0	2	0	0	0	2	2	0	0	2	0	2	2	2	0	2	2	2	0	3	0	0	2	0	2	0	0	0	0	0	2	3	2	2
chr10:123507901-123515722	fixed_Gbeg-Ggod-Ggog	7821	ATE1	2	2	0	0	1	2	0	2	0	2	2	0	0	2	0	0	0	2	2	0	0	2	0	2	2	2	0	2	2	2	0	2	0	0	2	0	2	0	0	0	0	0	2	2	2	2
chr10:124302912-124309011	fixed_Hde	6099		2	2	2	2	2	2	2	2	2	2	1	2	2	2	2	2	2	2	2	2	2	2	2	2	2	2	2	2	2	2	2	2	2	2	2	2	2	2	2	2	2	2	2	2	2	2
chr10:124646934-124656615	Gbeg-Ggod-Ggog-Ppa-Ptre-Ptrs-Ptrt-Ptrv	9681	LOC399815	0	2	0	0	2	2	0	0	0	0	0	0	0	2	0	0	0	2	0	0	0	0	0	2	0	0	0	2	0	2	0	2	0	0	0	0	0	0	0	0	0	0	0	2	0	0
chr10:124947173-124953022	fixed_Pab-Ppy	5849		2	0	2	2	0	0	2	2	2	2	2	2	2	3	2	2	2	0	3	2	2	2	2	0	2	2	2	0	2	0	2	0	2	2	2	2	2	2	2	2	2	2	2	3	2	2
chr10:125326772-125330471	fixed_Ppa-Ptre-Ptrs-Ptrt-Ptrv	3699		0	2	2	2	2	2	2	0	2	0	0	2	2	2	2	3	2	2	0	2	2	0	2	2	0	0	2	2	0	2	2	2	2	2	0	3	0	2	2	2	2	2	0	3	0	0
chr10:127802680-127805621	fixed_Hde	2941	ADAM12	2	2	2	2	1	1	2	2	2	2	1	2	2	3	2	2	2	1	2	2	2	2	2	2	2	2	2	1	2	2	2	1	2	2	2	2	2	2	2	2	2	1	2	3	2	2
chr10:128222038-128222876	fixed_Pab-Ppy	838		2	0	2	2	0	0	2	2	2	2	2	2	2	2	2	2	2	0	2	2	2	2	2	0	2	2	2	0	2	0	2	0	2	2	2	2	2	2	2	2	2	2	2	3	2	3
chr10:131965614-131972555	fixed_Pab-Ppy	6941		2	0	2	2	0	0	2	2	2	2	2	2	2	2	2	2	2	0	2	2	2	2	2	0	2	2	2	0	2	0	2	0	2	2	2	2	2	2	2	2	2	2	2	2	2	2
chr10:132115473-132118163	fixed_Pab-Ppy	2690		2	0	2	2	0	0	2	2	2	2	2	2	2	2	2	2	2	0	2	2	2	2	2	0	2	2	2	0	2	0	2	0	2	2	2	2	2	2	2	2	2	2	2	2	2	2
chr10:132338632-132341062	fixed_Pab-Ppy	2430		2	0	2	1	0	0	1	1	1	2	1	2	1	2	1	2	2	0	1	2	2	2	1	0	2	2	2	0	1	0	2	0	1	2	1	1	2	2	2	2	2	2	2	2	1	1
chr10:132367302-132371499	fixed_Gbeg-Ggod-Ggog	4197		2	2	0	0	2	2	0	2	0	2	2	0	0	2	0	0	0	2	2	0	0	2	0	2	2	2	0	2	2	2	0	2	0	0	3	0	2	0	0	0	0	0	2	2	2	2
chr10:133374892-133375987	fixed_Ppa-Ptre-Ptrs-Ptrt-Ptrv	1095		0	2	2	2	2	2	2	0	2	0	0	2	2	2	2	2	2	2	0	2	2	0	2	2	0	0	2	2	0	2	2	2	2	2	0	1	0	2	2	2	2	2	0	2	0	0
chr10:133760097-133768752	fixed_Gbeg-Ggod-Ggog	8655	JAKMIP3	2	2	0	0	2	2	0	2	0	2	2	0	0	2	0	0	0	1	2	0	0	2	0	2	2	2	0	1	2	2	0	2	0	0	2	0	2	0	0	0	0	0	2	2	2	2
chr10:134053693-134055424	fixed_Pab-Ppy	1731		2	0	2	2	0	0	1	2	2	3	2	1	3	3	3	2	2	0	2	2	2	3	3	0	3	3	2	0	3	0	2	0	2	2	2	2	2	2	2	2	3	2	2	3	2	1
chr10:134662727-134664971	fixed_Pab-Ppy	2244		2	0	4	3	0	0	2	2	4	2	2	4	3	2	3	5	3	0	2	2	4	2	3	0	2	2	4	0	2	0	2	0	4	4	2	2	2	4	4	4	4	4	2	3	2	2
chr11:66279-66779	fixed_Pab-Ppy	500		10	0	14	19	0	0	17	17	18	10	8	18	17	22	17	18	13	0	19	15	15	11	20	0	10	10	18	0	9	0	16	0	13	12	18	13	11	22	14	14	17	13	18	16	19	22
chr11:66779-86758	Gbeg-Ggod-Ggog-Pab-Ppy	19979		9	0	0	0	0	0	0	16	0	9	8	0	0	19	0	0	0	0	16	0	0	9	0	0	8	9	0	0	7	0	0	0	0	0	16	0	10	0	0	0	0	0	16	16	16	19
chr11:3045664-3062331	Gbeg-Ggod-Ggog-Ppa-Ptre-Ptrs-Ptrt-Ptrv	16667		0	2	0	0	2	2	0	0	0	0	0	0	0	2	0	0	0	2	0	0	0	0	0	2	0	0	0	2	0	2	0	2	0	0	0	0	0	0	0	0	0	0	0	2	0	0
chr11:3119098-3126177	fixed_Pab-Ppy	7079	OSBPL5	2	0	2	1	0	0	2	2	2	2	1	2	2	3	2	2	2	0	2	2	2	2	2	0	2	2	2	0	1	0	2	0	2	2	3	1	1	2	2	2	2	2	2	2	3	2
chr11:3166050-3169534	fixed_Pab-Ppy	3484		2	0	1	2	0	0	1	1	1	2	1	2	2	2	2	1	2	0	2	2	1	2	1	0	2	2	2	0	2	0	1	0	2	2	2	1	2	1	1	2	1	2	1	2	2	2
chr11:3609924-3612216	fixed_Ppa-Ptre-Ptrs-Ptrt-Ptrv	2292	TRPC2	0	3	2	3	3	3	2	0	2	0	0	2	2	2	3	2	3	2	0	2	2	0	3	2	0	0	2	2	0	2	2	3	2	2	0	3	0	3	2	2	2	3	0	3	0	0
chr11:4123216-4124814	fixed_Gbeg-Ggod-Ggog	1598		2	2	0	0	2	2	0	3	0	3	2	0	0	2	0	0	0	2	2	0	0	2	0	2	2	2	0	2	2	3	0	3	0	0	2	0	2	0	0	0	0	0	2	2	3	2
chr11:4333386-4351354	fixed_Pab-Ppy	17968	OR52B4	2	0	2	3	0	0	2	2	2	2	2	2	2	2	3	2	2	0	2	2	2	2	2	0	2	2	2	0	2	0	2	0	2	2	2	2	2	2	3	2	3	2	2	2	3	2
chr11:4470018-4499476	fixed_Ppa-Ptre-Ptrs-Ptrt-Ptrv	29458		0	2	2	2	2	2	2	0	2	0	0	2	2	2	2	2	2	2	0	2	2	0	2	2	0	0	2	2	0	2	2	2	2	2	0	2	0	2	2	2	2	2	0	3	0	0
chr11:4876483-4881936	fixed_Ppa	5453		2	1	2	2	1	1	2	0	2	2	2	2	2	2	2	2	1	1	0	2	2	2	2	1	2	2	2	1	2	1	2	1	2	2	0	2	2	2	2	2	2	2	0	2	0	0
chr11:5037506-5060796	fixed_Pab-Ppy	23290		2	0	2	2	0	0	2	2	2	2	2	2	2	2	2	2	2	1	2	2	2	2	2	0	2	2	2	0	2	0	2	0	2	2	2	2	2	2	2	2	2	2	2	2	2	2
chr11:5149039-5165612	fixed_Ppa-Ptre-Ptrs-Ptrt-Ptrv	16573		0	2	2	2	2	2	2	0	2	0	0	2	2	2	2	1	2	2	0	2	2	0	2	1	0	0	2	2	0	2	2	2	1	1	0	2	0	2	2	2	2	2	0	2	0	0
chr11:5441895-5447679	fixed_Gbeg	5784	OR51B5	2	2	2	2	2	2	2	2	2	2	2	2	2	2	2	2	2	2	0	2	2	2	0	2	2	2	2	2	2	2	2	2	2	2	1	2	2	2	2	2	2	2	0	3	2	2
chr11:5461625-5462233	fixed_Ppy	608	OR51B5	2	2	2	2	0	3	2	2	2	1	1	2	2	3	2	2	2	0	2	2	2	2	2	0	2	2	2	0	1	0	2	1	2	2	2	2	2	2	2	2	2	2	2	2	2	2
chr11:5498699-5503143	fixed_Pab-Ppy	4444		2	0	2	2	0	0	2	2	2	2	2	2	2	2	2	2	2	0	2	2	2	2	2	0	2	2	2	0	2	0	2	0	2	2	2	2	2	2	2	2	2	2	2	2	2	2
chr11:5541982-5546150	fixed_Ppa	4168		2	2	2	2	2	2	2	0	2	2	2	2	2	2	2	2	2	2	0	2	2	2	2	2	2	2	3	2	2	2	2	2	2	2	0	2	2	2	2	2	2	2	0	2	0	0
chr11:5798657-5945240	fixed_Pab-Ppy	146583	OR52N2,OR52E6,OR52E8,OR52E4,OR56A3	2	0	2	2	0	0	2	2	2	2	2	2	2	2	2	2	2	0	2	2	2	2	2	0	2	2	2	0	2	0	2	0	2	2	2	2	2	2	2	2	2	2	2	2	2	2
chr11:6154169-6172456	fixed_Gbeg-Ggod-Ggog	18287		2	2	0	0	2	2	0	2	0	2	2	0	0	3	0	0	0	2	2	0	0	2	0	2	2	2	0	2	2	2	0	2	0	0	2	0	2	0	0	0	0	0	2	3	2	2
chr11:6721165-6724350	fixed_Ppy	3185		2	2	2	2	0	1	2	2	2	2	1	2	2	2	2	2	2	0	2	2	2	2	2	0	2	2	2	0	2	0	2	1	2	2	2	2	1	2	1	2	2	2	2	2	2	2
chr11:6853549-6890272	fixed_Ppa-Ptre-Ptrs-Ptrt-Ptrv	36723	OR10A4,OR2D2	0	2	2	2	2	2	2	0	2	0	0	2	2	2	2	2	2	2	0	2	2	0	2	2	0	0	2	2	0	2	2	2	2	2	0	2	0	2	2	2	2	2	0	3	0	0
chr11:8824136-8830125	fixed_Pab-Ppy	5989	ST5	2	0	2	2	0	0	2	2	2	2	2	2	2	3	2	2	2	0	2	2	2	2	2	0	2	2	2	0	2	0	2	0	2	2	2	2	2	2	2	2	2	2	2	2	2	2
chr11:9517953-9542811	fixed_Gbeg	24858		2	2	2	2	2	2	2	2	1	2	1	2	2	2	2	2	2	2	2	2	2	2	0	2	2	2	2	2	2	2	2	2	1	2	2	2	2	1	2	2	2	2	2	2	2	2
chr11:13357792-13358396	fixed_Gbeg-Ggod-Ggog	604	ARNTL	2	2	0	0	1	2	0	2	0	2	2	0	0	2	0	0	0	2	2	0	0	2	0	2	2	2	0	1	2	2	0	2	0	0	3	0	2	0	0	0	0	0	2	2	2	2
chr11:13531729-13580390	fixed_Ppa-Ptre-Ptrs-Ptrt-Ptrv	48661		0	3	2	3	2	3	3	0	3	0	0	2	2	3	2	2	2	2	0	2	2	0	2	2	0	0	2	2	0	3	3	2	2	2	0	3	0	3	2	2	2	2	0	3	0	0
chr11:14137002-14142342	fixed_Gbeg-Ggod-Ggog	5340	SPON1	2	2	0	0	2	2	0	2	0	2	1	0	0	2	0	0	0	2	2	0	0	2	0	2	2	2	0	2	3	2	0	2	0	0	2	0	2	0	0	0	0	0	2	2	2	2
chr11:14180153-14183754	fixed_Ptrv	3601	SPON1	0	2	2	2	2	2	2	2	2	1	0	2	2	3	2	2	2	2	2	2	2	2	2	2	0	2	2	2	2	2	2	2	2	2	2	2	1	2	2	2	2	2	2	2	2	2
chr11:15208847-15210389	fixed_Ppa-Ptre-Ptrs-Ptrt-Ptrv	1542	INSC	0	2	2	2	2	2	2	0	2	0	0	2	2	2	2	2	2	2	0	2	2	0	2	2	0	0	2	2	0	2	3	2	2	2	0	2	0	2	2	2	2	2	0	2	0	0
chr11:18088751-18110496	fixed_Pab-Ppy	21745	SAA3P,MRGPRX3	2	0	2	2	0	0	2	2	2	2	2	2	2	3	2	2	2	0	2	2	2	2	2	0	2	2	2	0	2	0	2	0	2	2	2	2	2	2	2	2	2	2	2	3	2	2
chr11:18121487-18146272	fixed_Pab-Ppy	24785		2	0	2	2	0	0	2	2	2	2	2	2	2	2	2	2	2	0	2	2	2	2	2	0	2	2	2	0	2	0	2	0	2	2	2	3	2	2	2	2	2	2	2	3	2	2
chr11:21626500-21631910	fixed_Hde	5410		2	2	2	2	1	2	2	2	2	2	2	2	2	2	2	2	2	1	2	2	2	2	2	1	2	2	2	1	2	1	2	2	2	2	2	2	1	2	2	2	2	2	2	2	2	2
chr11:21851370-21853714	fixed_Gbeg-Ggod-Ggog	2344		2	2	0	0	1	2	0	2	0	2	1	0	0	2	0	0	0	2	2	0	0	2	0	2	2	2	0	2	2	2	0	2	0	0	2	0	2	0	0	0	0	0	2	3	2	2
chr11:22403771-22404548	fixed_Pab-Ppy	777		2	0	1	2	0	0	2	2	2	2	1	2	2	2	2	2	2	0	2	2	1	2	2	0	2	2	2	0	2	0	2	0	2	2	2	2	2	2	2	2	1	2	2	2	2	2
chr11:22944822-22961979	fixed_Pab-Ppy	17157		2	0	2	2	0	0	2	2	2	2	2	2	2	2	2	2	2	0	2	2	2	2	2	0	2	2	2	0	2	0	2	0	2	2	2	2	2	2	2	2	2	2	2	2	2	2
chr11:23173653-23175210	fixed_Gbeg-Ggod-Ggog	1557		2	2	0	0	2	2	0	2	0	2	2	0	0	2	0	0	0	2	2	0	0	2	0	2	2	2	0	2	2	2	0	2	0	0	2	0	1	0	0	0	0	0	2	2	2	2
chr11:23209080-23220690	fixed_Ppa	11610		2	2	2	2	2	2	2	0	2	2	2	2	2	2	2	2	2	2	0	2	2	2	2	2	2	2	2	2	2	2	2	2	2	2	0	2	2	2	2	2	2	2	0	2	0	0
chr11:23418007-23434304	fixed_Gbeg-Ggod-Ggog	16297		2	2	0	0	2	2	0	2	0	2	2	0	0	2	0	0	0	2	2	0	0	2	0	2	2	2	0	2	2	2	0	2	0	0	2	0	2	0	0	0	0	0	2	2	2	2
chr11:23474789-23475686	fixed_Pab-Ppy	897		2	0	2	2	0	0	2	2	2	2	2	2	2	2	2	2	2	0	2	2	2	2	2	0	2	2	2	0	2	0	2	0	2	2	2	2	2	2	2	2	2	2	2	3	2	2
chr11:23835087-23839868	fixed_Ptre-Ptrs-Ptrt-Ptrv	4781		0	2	2	2	2	2	2	2	2	0	0	2	2	2	2	1	2	2	2	2	2	0	2	2	0	0	2	2	0	2	2	2	2	1	2	2	0	2	2	2	2	2	2	2	2	1
chr11:24248730-24265527	fixed_Gbeg-Ggod-Ggog	16797		2	2	0	0	2	2	0	2	0	2	2	0	0	2	0	0	0	2	2	0	0	2	0	2	2	1	0	2	2	2	0	2	0	0	2	0	2	0	0	0	0	0	1	2	2	2
chr11:24976772-24986664	fixed_Pab-Ppy	9892	LUZP2	2	0	2	2	0	0	2	2	2	1	1	2	2	2	2	1	2	0	2	2	2	1	2	0	2	2	1	0	2	0	2	0	1	2	2	2	2	2	2	2	2	2	2	2	2	2
chr11:24986664-24989530	Ppa-Ptre-Ptrs-Ptrt-Ptrv-Pab-Ppy	2866	LUZP2	0	0	2	2	0	0	2	0	2	0	0	2	2	2	2	1	2	0	0	2	2	0	2	0	0	0	2	0	0	0	2	0	2	2	0	2	0	2	2	2	2	2	0	3	0	0
chr11:24989530-24998941	fixed_Pab-Ppy	9411	LUZP2	2	0	2	2	0	0	2	2	2	2	2	2	2	2	2	2	2	0	2	2	2	2	2	0	2	2	2	0	1	0	2	0	2	2	2	2	2	2	2	2	2	2	2	2	2	2
chr11:25103305-25115890	fixed_Gbeg-Ggod-Ggog	12585		2	2	0	0	2	2	0	2	0	2	2	0	0	2	0	0	0	1	2	0	0	2	0	1	2	2	0	2	2	2	0	2	0	0	2	0	2	0	0	0	0	0	2	2	2	2
chr11:25192752-25207289	fixed_Ppa	14537		2	2	1	2	2	2	2	0	2	2	2	2	2	2	2	2	2	2	0	2	2	2	2	2	2	2	2	2	1	2	2	2	2	2	0	2	2	2	2	2	2	2	0	2	0	0
chr11:25310461-25316790	fixed_Ppa-Ptre-Ptrs-Ptrt-Ptrv	6329		0	2	2	2	2	2	2	0	2	0	0	2	2	2	2	1	2	2	0	2	2	0	2	2	0	0	2	2	0	2	2	2	2	2	0	2	0	2	2	2	2	2	0	2	0	0
chr11:25464576-25473655	fixed_Ppa-Ptre-Ptrs-Ptrt-Ptrv	9079		0	2	2	2	2	2	2	0	2	0	0	2	2	2	2	2	2	2	0	2	2	0	2	2	0	0	2	1	0	2	2	2	2	2	0	2	0	2	2	2	2	2	0	2	0	0
chr11:25486995-25487799	fixed_Pab-Ppy	804		2	0	2	2	0	0	2	2	1	2	2	2	1	2	2	2	1	0	2	2	2	2	2	0	3	2	2	0	1	0	2	0	2	1	2	2	1	2	2	3	2	2	3	2	2	2
chr11:25573773-25581368	fixed_Ppa	7595		2	2	2	2	2	2	2	0	2	2	2	2	2	1	2	2	2	2	0	2	2	2	2	2	2	2	2	2	2	2	2	2	2	2	0	2	2	2	2	2	2	2	0	2	0	0
chr11:25599396-25619675	fixed_Ppa-Ptre-Ptrs-Ptrt-Ptrv	20279		0	2	2	2	2	2	2	0	2	0	0	2	2	2	2	2	2	2	0	2	2	0	2	2	0	0	2	2	0	2	2	2	2	2	0	2	0	2	2	2	2	2	0	2	0	0
chr11:25721235-25729495	fixed_Gbeg-Ggod-Ggog	8260		2	2	0	0	1	2	0	2	0	2	2	0	0	2	0	0	0	1	2	0	0	2	0	1	1	2	0	1	2	1	0	1	0	0	2	0	2	0	0	0	0	0	2	3	2	2
chr11:25847947-25854120	fixed_Gbeg-Ggod-Ggog	6173		2	2	0	0	2	2	0	2	0	2	1	0	0	2	0	0	0	1	2	0	0	2	0	2	2	2	0	2	2	2	0	2	0	0	2	0	2	0	0	0	0	0	2	2	2	2
chr11:26506052-26507666	fixed_Gbeg-Ggod-Ggog	1614	ANO3	2	2	0	0	2	2	0	1	0	2	1	0	0	2	0	0	0	2	1	0	0	1	0	2	1	2	0	2	1	2	0	2	0	0	1	0	2	0	0	0	0	0	2	2	1	1
chr11:26538357-26539159	fixed_Gbeg-Ggod-Ggog	802	ANO3,MUC15	2	2	0	0	2	2	0	2	0	2	2	0	0	2	0	0	0	2	2	0	0	2	0	2	1	2	0	2	2	2	0	2	0	0	2	0	2	0	0	0	0	0	2	2	2	2
chr11:27101428-27103013	fixed_Gbeg-Ggod-Ggog	1585	BBOX1	2	2	0	0	2	2	0	2	0	2	2	0	0	2	0	0	0	2	2	0	0	2	0	2	2	2	0	2	2	2	0	2	0	0	2	0	2	0	0	0	0	0	1	2	2	2
chr11:28509444-28512730	fixed_Gbeg-Ggod-Ggog	3286		2	2	0	0	2	2	0	2	0	2	2	0	0	2	0	0	0	2	2	0	0	2	0	2	2	2	0	2	1	2	0	2	0	0	2	0	2	0	0	0	0	0	2	2	2	2
chr11:29586911-29592540	fixed_Pab-Ppy	5629		2	0	2	2	0	0	2	2	2	2	2	2	2	2	2	2	2	0	2	2	2	2	2	0	2	2	2	0	2	0	2	0	2	2	2	2	2	2	2	2	2	2	2	2	2	2
chr11:30134052-30135265	fixed_Ppa-Ptre-Ptrs-Ptrt-Ptrv	1213		0	2	2	2	2	2	2	0	2	0	0	2	2	2	2	3	1	2	0	2	1	0	2	2	0	0	2	2	0	2	2	1	2	2	0	3	0	2	2	2	2	2	0	2	0	0
chr11:31145499-31148758	fixed_Ppa	3259		2	2	2	1	2	2	2	0	2	2	2	2	2	2	2	2	2	2	0	2	2	2	2	2	2	2	2	2	2	2	2	2	2	2	0	2	2	2	2	2	2	2	0	3	0	0
chr11:31163683-31167506	fixed_Gbeg-Ggod-Ggog	3823		2	2	0	0	2	2	0	2	0	2	2	0	0	2	0	0	0	2	2	0	0	2	0	2	2	2	0	2	2	2	0	2	0	0	2	0	2	0	0	0	0	0	2	3	2	2
chr11:34993494-34999146	fixed_Pab-Ppy	5652		2	0	2	2	0	0	2	2	2	2	2	2	2	2	2	2	2	0	2	2	2	2	2	0	2	2	2	0	2	0	2	0	2	2	2	2	2	2	2	2	2	3	2	2	2	2
chr11:35217765-35223082	fixed_Gbeg	5317		2	2	2	2	2	2	1	2	2	2	2	2	1	3	2	2	2	2	2	2	2	2	0	2	2	2	2	2	1	2	2	2	2	1	2	2	1	2	2	2	2	1	2	3	2	2
chr11:35771089-35779640	fixed_Gbeg-Ggod-Ggog	8551	TRIM44	2	2	0	0	2	2	0	2	0	2	2	0	0	2	0	0	0	2	2	0	0	2	0	2	2	2	0	2	2	2	0	2	0	0	2	0	2	0	0	0	0	0	2	2	2	2
chr11:36830610-36834034	fixed_Ppa	3424		2	2	2	2	2	2	2	0	2	2	2	2	2	2	2	2	2	2	0	2	2	2	2	2	2	2	2	2	2	2	3	2	2	2	0	2	2	2	2	2	2	2	0	2	0	0
chr11:37199436-37201455	fixed_Pab-Ppy	2019		2	0	2	2	0	0	2	2	2	2	1	2	1	2	2	2	2	0	2	2	2	2	2	0	1	2	1	0	1	0	2	0	2	2	2	2	1	1	2	1	2	2	1	2	1	2
chr11:37530756-37531549	fixed_Pab-Ppy	793		2	0	2	2	0	0	3	2	2	2	2	2	2	2	2	1	2	0	2	2	2	2	2	0	2	2	1	0	2	0	3	0	2	2	2	2	2	2	2	2	2	2	2	2	2	2
chr11:37718983-37723694	fixed_Ppa-Ptre-Ptrs-Ptrt-Ptrv	4711		0	1	2	2	1	1	2	0	2	0	0	1	2	2	2	1	2	1	0	2	1	0	2	1	0	0	1	1	0	1	2	1	2	2	0	2	0	2	2	2	2	2	0	2	0	0
chr11:37966912-37967412	fixed_Ppa	500		2	2	1	2	2	2	3	0	2	2	2	2	2	2	2	2	2	1	0	2	2	2	2	2	2	2	2	2	1	2	2	2	2	2	0	2	1	2	2	2	2	2	0	2	0	0
chr11:38715956-38742092	fixed_Ppa-Ptre-Ptrs-Ptrt-Ptrv	26136		0	2	2	2	2	2	2	0	2	0	0	2	2	2	2	2	2	2	0	2	2	0	2	2	0	0	2	2	0	2	2	2	2	2	0	2	0	2	2	2	2	2	0	2	0	0
chr11:38756371-38767046	fixed_Gbeg-Ggod-Ggog	10675		2	2	0	0	2	2	0	2	0	2	2	0	0	2	0	0	0	2	2	0	0	2	0	2	2	2	0	2	2	2	0	2	0	0	2	0	2	0	0	0	0	0	2	2	2	2
chr11:39164519-39172944	fixed_Gbeg-Ggod-Ggog	8425		2	2	0	0	1	2	0	2	0	2	2	0	0	2	0	0	0	2	2	0	0	2	0	2	1	2	0	2	2	2	0	2	0	0	2	0	2	0	0	0	0	0	2	2	2	2
chr11:39177761-39180500	fixed_Ppa-Ptre-Ptrs-Ptrt-Ptrv	2739		0	2	1	2	2	2	2	0	2	0	0	2	2	2	2	2	2	2	0	2	2	0	2	2	0	0	1	2	0	2	2	2	2	2	0	2	0	2	2	2	2	2	0	2	0	0
chr11:40716854-40719605	fixed_Gbeg-Ggod-Ggog	2751	LRRC4C	2	2	0	0	1	2	0	2	0	2	1	0	0	2	0	0	0	1	2	0	0	2	0	1	2	2	0	1	2	1	0	2	0	0	2	0	2	0	0	0	0	0	2	2	2	2
chr11:40763398-40764782	fixed_Gbeg-Ggod-Ggog	1384	LRRC4C	2	2	0	0	2	2	0	2	0	2	2	0	0	2	0	0	0	2	2	0	0	2	0	2	2	2	0	1	1	2	0	2	0	0	2	0	2	0	0	0	0	0	2	3	2	2
chr11:41133948-41144415	fixed_Pab-Ppy	10467	LRRC4C	2	0	2	2	0	0	2	2	2	2	2	2	2	2	2	2	2	0	2	2	2	2	2	0	2	2	2	0	2	0	2	0	2	2	2	2	2	2	2	2	2	2	2	2	2	2
chr11:41900177-41906344	fixed_Ppa-Ptre-Ptrs-Ptrt-Ptrv	6167		0	2	2	2	2	2	2	0	2	0	0	2	1	2	2	1	2	2	0	2	1	0	2	1	0	0	2	2	0	2	2	2	2	2	0	2	0	2	2	2	2	1	0	2	0	0
chr11:45302696-45307425	fixed_Pab-Ppy	4729		2	0	2	2	0	0	2	2	2	2	2	2	2	2	2	2	2	0	2	2	2	2	2	0	2	2	2	0	2	0	2	0	2	2	2	3	2	2	2	2	2	2	2	2	2	2
chr11:45459366-45460916	fixed_Ppa-Ptre-Ptrs-Ptrt-Ptrv	1550		0	3	2	2	3	2	3	0	3	0	0	2	2	3	2	3	2	2	0	2	2	0	2	2	0	0	2	2	0	3	2	3	2	2	0	3	0	3	2	2	2	3	0	3	0	0
chr11:46919257-46921580	fixed_Pab-Ppy	2323	C11orf49	2	0	2	2	0	0	2	2	2	2	2	2	2	2	2	2	3	0	2	2	2	2	2	0	2	2	2	0	2	0	2	0	2	2	2	2	2	2	2	2	2	2	2	2	2	2
chr11:48187924-48199103	fixed_Pab-Ppy	11179	OR4B1	2	0	2	2	0	0	2	2	2	2	2	2	2	2	2	2	2	0	2	2	2	2	2	0	2	2	2	0	1	0	2	0	2	2	2	2	2	2	2	2	2	2	2	3	2	2
chr11:48300552-48341489	fixed_Ppy	40937	OR4C3,OR4C45	3	2	2	3	0	2	2	3	3	3	3	3	4	4	3	2	3	0	3	3	2	3	2	0	3	3	3	0	3	0	3	2	3	2	3	4	3	4	3	3	2	3	3	4	3	4
chr11:48341489-48423018	fixed_Pab-Ppy	81529		3	0	2	3	0	0	2	4	3	4	3	3	3	5	3	2	2	0	3	3	2	3	2	0	4	4	3	0	3	0	4	0	3	2	4	4	3	4	3	3	2	2	4	5	4	4
chr11:48423018-48467554	fixed_Ppy	44536	OR4A47	5	2	2	3	0	2	2	5	3	5	4	3	3	5	3	2	3	0	5	3	2	5	2	0	5	4	3	0	4	0	4	2	3	2	5	4	4	4	3	4	2	3	5	5	5	5
chr11:48467554-48858153	fixed_Pab-Ppy	390599	OR4A47	6	0	2	3	0	0	2	6	3	6	5	3	4	5	3	2	3	0	6	3	2	5	2	0	5	5	3	0	5	0	4	0	3	2	6	4	5	4	3	4	2	3	6	5	6	6
chr11:48865580-48870734	fixed_Pab-Ppy	5154		6	0	8	8	0	0	9	8	9	7	6	8	8	15	9	8	8	0	9	9	9	7	9	0	7	6	9	0	7	0	8	0	10	9	8	9	6	9	9	9	8	9	9	17	9	9
chr11:48930470-48939302	fixed_Pab-Ppy	8832		7	0	8	8	0	0	9	9	8	8	6	8	8	14	8	9	8	0	9	9	9	7	8	0	7	7	9	0	7	0	9	0	9	9	8	9	5	8	9	9	8	9	9	16	8	8
chr11:49462958-49465181	fixed_Pab-Ppy	2223		2	0	3	3	0	0	5	2	4	2	2	4	4	4	4	3	4	0	2	4	3	2	4	0	2	2	4	0	1	0	4	0	4	3	2	5	2	5	4	4	4	4	2	5	2	2
chr11:49803443-49810734	fixed_Pab-Ppy	7291		6	0	8	8	0	0	9	7	8	6	5	8	8	14	8	8	8	0	8	9	8	6	9	0	6	6	8	0	6	0	8	0	9	9	8	9	5	8	9	8	8	9	8	15	8	8
chr11:49876047-49899345	fixed_Pab-Ppy	23298		3	0	1	2	0	0	2	3	2	2	2	3	3	5	2	1	2	0	3	2	2	3	1	0	2	3	2	0	2	0	3	0	3	2	3	3	3	3	2	3	2	3	3	5	3	3
chr11:49901981-49932696	fixed_Ppy	30715	OR4C13	4	1	1	2	0	1	2	5	2	4	4	2	2	5	2	1	2	0	5	2	1	4	2	0	4	4	2	0	4	0	3	1	2	1	5	3	4	3	2	3	1	2	5	5	4	4
chr11:49932696-49995769	fixed_Pab-Ppy	63073	OR4C12	3	0	1	2	0	0	1	4	2	3	3	2	2	5	2	1	2	0	3	2	1	3	1	0	3	3	2	0	3	0	2	0	2	1	3	3	3	3	2	2	1	2	3	5	4	3
chr11:51234591-51315232	fixed_Pab-Ppy	80641	OR4A5	6	0	2	3	0	0	2	6	3	5	5	3	4	6	3	2	3	0	6	3	2	5	2	0	5	6	3	0	5	0	4	0	3	2	6	4	5	4	3	4	2	3	6	6	6	6
chr11:51315232-51340746	fixed_Ppy	25514		4	2	2	3	0	2	2	5	3	4	4	3	3	5	3	2	3	0	5	3	2	4	2	0	4	4	3	0	4	0	4	2	3	2	5	4	4	4	3	4	2	3	5	5	5	4
chr11:51340746-51451001	fixed_Pab-Ppy	110255	OR4C46	3	0	2	3	0	0	2	4	3	4	3	3	3	5	3	2	3	0	4	3	2	4	2	0	3	4	3	0	4	0	4	0	3	2	3	4	3	4	3	3	2	3	4	6	4	4
chr11:54809122-54815696	fixed_Pab-Ppy	6574		7	0	7	8	0	0	9	7	8	6	6	9	8	14	8	9	8	0	8	9	9	6	8	0	6	6	7	0	5	0	8	0	8	8	7	9	5	8	9	7	8	9	8	15	7	8
chr11:54833062-55074683	fixed_Pab-Ppy	241621	OR4A16,OR4A15	3	0	2	3	0	0	3	3	3	3	3	3	3	3	3	3	3	0	3	3	3	3	3	0	3	3	3	0	3	0	3	0	3	3	3	3	3	3	3	3	2	3	3	3	3	3
chr11:55076947-55078387	Gbeg-Ggod-Ggog-Pab-Ppy	1440	OR4C15	2	0	0	0	0	0	0	2	0	2	1	0	0	2	0	0	0	0	2	0	0	2	0	0	2	2	0	0	2	0	0	0	0	0	2	0	2	0	0	0	0	0	1	2	2	2
chr11:55078387-55182743	fixed_Pab-Ppy	104356	OR4C15,OR4C16,OR4C11,OR4P4,OR4S2	2	0	2	2	0	0	2	2	2	2	2	2	2	2	2	2	2	0	2	2	2	2	2	0	2	2	2	0	2	0	2	0	2	2	2	2	2	2	2	2	2	2	2	1	2	2
chr11:55224785-55349023	fixed_Pab-Ppy	124238	OR5D13,OR5D14,OR5L1,OR5D18	2	0	2	2	0	0	2	2	2	2	2	2	2	2	2	2	2	0	2	2	2	2	2	0	2	2	2	0	2	0	2	0	2	2	2	2	2	2	2	2	2	2	2	2	2	2
chr11:55352495-55361877	Gbeg-Ggod-Ggog-Pab-Ppy	9382		2	0	0	0	0	0	0	2	0	2	2	0	0	2	0	0	0	0	2	0	0	2	0	0	2	2	0	0	2	0	0	0	0	0	2	0	2	0	0	0	0	0	2	2	2	2
chr11:55376331-55385076	Ppa-Ptre-Ptrs-Ptrt-Ptrv-Pab-Ppy	8745		0	0	1	2	0	0	2	0	2	0	0	2	2	2	2	2	2	0	0	2	2	0	2	0	0	0	2	0	0	0	2	0	2	2	0	2	0	2	2	2	2	2	0	2	0	0
chr11:55385076-55389580	fixed_Pab-Ppy	4504		6	0	9	9	0	0	10	9	9	6	5	10	8	17	9	9	9	0	9	10	10	6	10	0	6	6	9	0	6	0	10	0	10	9	9	10	5	9	10	8	10	10	9	17	9	9
chr11:55420027-55431216	fixed_Pab-Ppy	11189		2	0	2	2	0	0	2	2	2	2	2	2	2	2	2	2	2	0	2	2	2	2	2	0	2	2	2	0	2	0	2	0	2	2	2	2	2	2	2	2	2	2	2	2	2	2
chr11:55432613-55498049	fixed_Pab-Ppy	65436	OR5W2,OR5I1,OR10AG1	2	0	2	2	0	0	2	2	2	2	2	2	2	2	2	2	2	0	2	2	2	2	2	0	2	2	2	0	2	0	2	0	2	2	2	2	2	2	2	2	2	2	2	2	2	2
chr11:55508110-55880826	fixed_Pab-Ppy	372716	OR7E5P,OR5F1,OR5AS1,OR8I2,OR8H2,OR8H3,OR8J3,OR8K5,OR5J2,OR5T2,OR5T3,OR5T1,OR8H1,OR8K3,OR8K1	2	0	2	2	0	0	2	2	2	2	2	2	2	2	2	2	2	0	2	2	2	2	2	0	2	2	2	0	2	0	2	0	2	2	2	2	2	2	2	2	2	2	2	2	2	2
chr11:55883200-56100745	fixed_Pab-Ppy	217545	OR8J1,OR8U8,OR8U1,OR5R1,OR5M9,OR5M3,OR5M8,OR5M11	2	0	2	2	0	0	2	2	2	2	2	2	2	2	2	2	2	0	2	2	2	2	2	0	2	2	2	0	2	0	2	0	2	2	2	2	2	2	2	2	2	2	2	2	2	2
chr11:56100745-56101745	fixed_Pab	1000	OR8U8,OR5M10	4	0	4	4	2	0	4	4	5	4	3	4	3	4	4	5	4	2	4	4	4	4	4	2	4	4	5	2	5	2	5	0	4	4	4	5	4	5	4	4	3	4	4	5	4	4
chr11:56101745-56117886	fixed_Pab-Ppy	16141	OR8U8,OR5M10	2	0	2	2	0	0	2	2	2	2	1	2	2	2	2	2	2	0	2	2	2	2	2	0	2	2	2	0	2	0	2	0	2	2	2	2	2	2	2	2	2	2	2	2	2	2
chr11:56117886-56208761	fixed_Pab	90875	OR8U8,OR5M1,OR5AP2,OR5AR1	2	0	2	2	2	0	2	2	2	2	2	2	2	2	2	2	2	2	2	2	2	2	2	2	2	2	2	2	2	2	2	0	2	2	2	2	2	2	2	2	2	2	2	2	2	2
chr11:56216851-56225287	fixed_Pab	8436	OR8U8,OR9G9,OR9G1	2	0	2	2	2	0	2	2	2	2	2	2	2	3	2	2	2	2	2	2	2	2	2	2	2	2	2	2	2	2	2	0	2	2	2	2	2	2	2	2	2	2	2	3	2	2
chr11:56300007-56303022	fixed_Ppy	3015		2	2	2	2	0	2	2	2	2	2	2	2	2	2	2	2	2	0	2	2	2	2	2	0	2	2	2	0	2	0	2	2	2	2	2	2	2	2	2	2	2	2	3	2	2	2
chr11:57655098-57655855	fixed_Pab-Ppy	757	OR9Q1	2	0	2	1	0	0	2	2	1	1	1	2	1	1	1	1	1	0	1	1	1	1	1	0	1	1	1	0	1	0	2	0	1	1	1	2	2	1	1	1	1	2	2	1	1	2
chr11:57667201-57669003	fixed_Gbeg-Ggod-Ggog	1802	OR9Q1	1	2	0	0	1	2	0	2	0	2	1	0	0	2	0	0	0	1	2	0	0	2	0	1	2	2	0	1	2	1	0	2	0	0	2	0	2	0	0	0	0	0	2	2	2	2
chr11:59455426-59460710	fixed_Pab-Ppy	5284		2	0	2	2	0	0	2	2	1	2	2	2	2	2	2	2	2	0	2	2	2	2	2	0	2	2	2	0	2	0	2	0	1	2	2	2	2	2	2	2	2	2	3	2	2	2
chr11:59496526-59497712	fixed_Pab-Ppy	1186		2	0	2	2	0	0	2	2	3	2	2	2	2	2	2	2	2	0	2	2	2	2	2	0	2	2	1	0	2	0	3	0	2	2	2	2	2	3	2	1	2	2	2	3	2	2
chr11:60046684-60100944	fixed_Gbeg-Ggod-Ggog	54260	MS4A13	2	2	0	0	2	2	0	2	0	2	2	0	0	2	0	0	0	2	2	0	0	2	0	2	2	2	0	2	2	2	0	2	0	0	2	0	2	0	0	0	0	0	2	2	2	2
chr11:62038947-62039782	fixed_Gbeg-Ggod-Ggog	835	AHNAK	2	2	0	0	2	2	0	2	0	2	2	0	0	2	0	0	0	2	2	0	0	2	0	2	2	2	0	2	2	2	0	2	0	0	2	0	2	0	0	0	0	0	2	3	2	2
chr11:63214682-63219169	fixed_Gbeg-Ggod-Ggog	4487	RTN3	2	2	0	0	2	2	0	2	0	2	2	0	0	2	0	0	0	2	2	0	0	2	0	2	3	2	0	2	2	2	0	2	0	0	2	0	2	0	0	0	0	0	2	2	2	2
chr11:66619249-66630922	fixed_Ppa-Ptre-Ptrs-Ptrt-Ptrv	11673		0	2	2	2	2	2	2	0	2	0	0	2	2	2	2	2	2	2	0	2	2	0	2	2	0	0	2	2	0	2	2	2	2	2	0	2	0	2	2	2	2	2	0	2	0	0
chr11:70956535-70972948	fixed_Pab-Ppy	16413	KRTAP5-11	4	0	3	3	0	0	3	3	4	3	3	4	4	4	4	4	3	0	3	3	3	3	4	0	4	3	4	0	4	0	3	0	4	4	4	2	4	4	4	4	3	4	3	4	4	3
chr11:74370675-74373812	fixed_Ppa-Ptre-Ptrs-Ptrt-Ptrv	3137		0	2	2	2	2	2	2	0	2	0	0	2	2	2	2	2	2	2	0	2	2	0	2	2	0	0	2	2	0	2	2	2	2	2	0	2	0	2	2	2	2	2	0	2	0	0
chr11:79940369-79946991	fixed_Pab-Ppy	6622		2	0	2	2	0	0	2	2	2	2	2	2	2	2	2	2	2	0	2	2	2	2	2	0	2	2	2	0	2	0	2	0	2	2	2	2	2	2	2	2	2	2	2	2	2	2
chr11:81561584-81565106	fixed_Gbeg-Ggod-Ggog	3522		2	2	0	0	2	2	0	2	0	2	2	0	0	2	0	0	0	2	2	0	0	2	0	2	2	2	0	2	2	2	0	2	0	0	2	0	2	0	0	0	0	0	2	2	2	2
chr11:83489603-83490548	fixed_Gbeg	945	DLG2	2	2	2	2	2	2	2	2	2	2	1	2	2	2	2	2	2	1	2	2	2	2	0	2	2	2	2	2	1	2	2	2	2	2	2	2	2	2	2	3	2	2	2	2	2	2
chr11:83643848-83646828	fixed_Ptre-Ptrs-Ptrt-Ptrv	2980	DLG2	0	2	2	2	2	2	2	2	2	0	0	2	2	2	2	2	2	2	2	2	2	0	2	2	0	0	2	2	0	2	2	2	2	2	2	2	0	2	2	2	2	2	2	3	2	2
chr11:84030179-84033456	fixed_Pab-Ppy	3277	DLG2	2	0	2	2	0	0	2	2	1	2	1	2	2	2	2	2	2	0	2	2	2	2	2	0	2	2	2	0	2	0	2	0	2	2	2	2	2	2	2	2	2	2	2	2	2	2
chr11:84385382-84386501	fixed_Pab-Ppy	1119	DLG2	2	0	2	2	0	0	2	2	2	2	2	2	2	2	2	3	2	0	2	2	2	2	2	0	2	2	2	0	2	0	2	0	2	3	2	2	2	2	2	2	2	2	2	2	2	2
chr11:84402185-84407149	fixed_Gbeg-Ggod-Ggog	4964	DLG2	2	2	0	0	1	2	0	2	0	2	2	0	0	2	0	0	0	2	2	0	0	2	0	2	2	2	0	2	2	2	0	2	0	0	2	0	2	0	0	0	0	0	2	2	2	2
chr11:84850237-84859044	fixed_Pab-Ppy	8807	DLG2	2	0	2	2	0	0	2	2	3	2	2	2	2	2	2	2	2	0	2	2	2	2	2	0	2	2	2	0	2	0	2	0	2	2	2	2	2	2	2	2	2	2	2	3	2	2
chr11:86516814-86519632	fixed_Ppa-Ptre-Ptrs-Ptrt-Ptrv	2818	TMEM135	0	2	2	2	1	2	2	0	2	0	0	2	1	2	1	1	1	1	0	2	1	0	2	2	0	0	2	2	0	2	2	2	2	2	0	2	0	2	2	2	1	1	0	2	0	0
chr11:87825847-87836856	fixed_Pab-Ppy	11009		2	0	2	2	0	0	2	2	2	2	1	2	2	2	2	1	1	0	2	2	2	2	2	0	1	2	2	0	2	0	2	0	2	2	2	2	1	2	2	2	2	2	1	3	2	2
chr11:88581479-88588852	fixed_Pab-Ppy	7373	TYR	1	0	1	1	0	0	2	2	1	1	1	1	1	2	1	1	1	0	2	2	1	1	2	0	1	1	1	0	2	0	1	0	1	2	2	2	1	2	1	1	2	1	1	2	1	1
chr11:91138437-91141036	fixed_Ppa	2599		2	2	2	2	1	2	2	0	2	2	1	2	2	2	2	2	2	1	0	2	2	2	2	1	2	2	2	2	2	1	2	2	2	2	0	2	2	2	2	2	2	2	0	2	0	0
chr11:94905167-94910894	fixed_Hde	5727		2	2	2	2	2	2	2	2	2	2	2	2	2	2	2	2	2	2	2	2	2	2	2	2	2	2	2	2	2	2	2	2	2	2	2	2	2	2	2	2	2	2	2	3	2	2
chr11:96759270-96760882	fixed_Pab-Ppy	1612		1	0	2	1	0	0	2	2	2	2	1	2	2	2	2	2	2	0	1	2	2	1	2	0	2	1	2	0	2	0	2	0	2	2	1	1	2	2	2	1	1	1	2	2	1	1
chr11:96863615-96870309	fixed_Ppa-Ptre-Ptrs-Ptrt-Ptrv	6694		0	2	2	2	2	2	2	0	2	0	0	2	2	2	2	2	2	2	0	2	2	0	2	2	0	0	2	2	0	2	2	2	2	2	0	2	0	2	2	2	2	2	0	3	0	0
chr11:97050336-97052455	fixed_Pab-Ppy	2119		2	0	2	2	0	0	2	2	2	2	1	2	2	2	2	2	1	0	2	2	2	2	2	0	1	2	2	0	2	0	2	0	2	2	2	2	2	2	2	2	2	2	2	2	2	2
chr11:97260610-97264524	fixed_Pab-Ppy	3914		2	0	1	2	0	0	2	2	2	2	1	2	2	2	2	2	2	0	2	2	1	2	2	0	2	2	2	0	2	0	2	0	2	1	2	2	2	1	2	2	2	2	2	2	2	2
chr11:97685862-97688397	fixed_Ptrv	2535		0	2	1	1	2	1	2	2	1	2	1	2	1	2	2	2	2	2	2	2	2	1	2	2	0	2	1	2	2	2	2	2	2	2	2	2	2	1	2	1	2	1	2	2	2	2
chr11:97692772-97698361	fixed_Ppa-Ptre-Ptrs-Ptrt-Ptrv	5589		0	2	1	2	2	2	2	0	2	0	0	2	2	2	2	2	2	2	0	2	2	0	2	2	0	0	1	2	0	2	2	2	2	2	0	2	0	2	2	1	2	2	0	2	0	0
chr11:98097349-98104820	fixed_Ppa	7471		2	2	2	2	2	2	2	0	2	2	1	2	2	2	2	2	2	2	0	2	2	2	2	2	2	2	2	2	2	2	2	2	2	2	0	2	2	2	2	2	2	2	0	2	0	0
chr11:98185888-98187384	fixed_Ppa-Ptre-Ptrs-Ptrt-Ptrv	1496		0	2	2	2	2	2	2	0	2	0	0	2	2	2	2	2	2	2	0	2	2	0	2	2	0	0	3	1	0	2	2	2	2	2	0	2	0	2	2	2	2	2	0	2	0	0
chr11:98600010-98602402	fixed_Gbeg-Ggod-Ggog	2392	CNTN5	2	1	0	0	2	1	0	2	0	2	2	0	0	2	0	0	0	1	2	0	0	2	0	1	2	2	0	1	2	1	0	1	0	0	2	0	2	0	0	0	0	0	2	2	2	2
chr11:99125607-99127638	fixed_Pab-Ppy	2031	CNTN5	2	0	1	2	0	0	2	2	2	2	1	2	2	2	2	2	2	0	2	2	2	2	2	0	1	2	1	0	1	0	2	0	2	2	2	2	1	2	2	1	2	2	1	2	2	1
chr11:100882088-100889596	fixed_Hde	7508	TRPC6	2	2	2	2	1	2	2	2	2	2	2	2	2	2	2	2	2	2	2	2	2	2	2	2	2	2	2	2	2	2	2	2	2	2	2	2	2	2	2	2	2	2	2	3	2	2
chr11:101680370-101681833	fixed_Pab-Ppy	1463		2	0	2	2	0	0	3	2	2	2	2	2	2	3	2	3	3	0	2	2	2	2	2	0	2	2	3	0	2	0	2	0	2	2	2	2	2	2	2	2	2	2	2	3	2	2
chr11:102368486-102370903	fixed_Gbeg-Ggod-Ggog	2417		2	2	0	0	2	2	0	2	0	2	2	0	0	2	0	0	0	2	2	0	0	2	0	2	2	2	0	1	2	2	0	2	0	0	2	0	2	0	0	0	0	0	2	3	2	2
chr11:102398895-102400372	fixed_Pab-Ppy	1477		2	0	2	2	0	0	2	2	2	2	2	2	2	2	2	2	1	0	2	2	2	2	1	0	2	2	2	0	2	0	2	0	2	2	1	2	2	2	2	2	1	2	2	2	2	2
chr11:102731118-102734381	fixed_Gbeg	3263	DYNC2H1	2	2	2	1	2	2	1	2	1	2	2	2	2	2	2	1	2	2	2	2	2	2	0	2	2	2	2	2	2	2	1	2	2	1	2	2	1	2	2	2	2	2	2	2	2	2
chr11:102735104-102735991	fixed_Ppa-Ptre-Ptrs-Ptrt-Ptrv	887	DYNC2H1	0	2	2	2	2	2	2	0	2	0	0	2	2	2	2	2	2	2	0	2	2	0	2	2	0	0	2	2	0	2	2	2	2	2	0	2	0	2	1	2	2	2	0	2	0	0
chr11:102787279-102789751	fixed_Pab-Ppy	2472	DYNC2H1	2	0	2	2	0	0	2	2	2	2	1	2	2	2	2	2	2	0	2	2	2	2	2	0	2	2	2	0	2	0	2	0	2	2	2	2	1	2	2	2	2	2	2	2	2	2
chr11:104180884-104183349	fixed_Pab-Ppy	2465		2	0	2	2	0	0	2	2	2	2	2	2	2	2	2	2	2	0	2	2	2	2	2	0	2	2	2	0	2	0	2	0	2	2	2	2	2	2	2	2	2	2	2	2	2	2
chr11:104360577-104369143	fixed_Ptre-Ptrs-Ptrt-Ptrv	8566		0	2	2	2	2	2	2	2	2	0	0	2	2	2	2	2	2	2	2	2	2	0	2	2	0	0	2	2	0	2	2	2	2	2	2	2	0	2	2	2	2	2	2	2	2	2
chr11:104499391-104539689	fixed_Ppa-Ptre-Ptrs-Ptrt-Ptrv	40298	CARD18	0	2	2	2	2	2	2	0	2	0	0	2	2	2	2	2	2	2	0	2	2	0	2	2	0	0	2	2	0	2	2	2	2	2	0	2	0	2	2	2	2	2	0	2	0	0
chr11:104914951-104920092	fixed_Gbeg-Ggod-Ggog	5141		2	2	0	0	2	2	0	2	0	2	1	0	0	2	0	0	0	2	2	0	0	2	0	2	2	2	0	2	2	2	0	2	0	0	2	0	2	0	0	0	0	0	2	2	2	2
chr11:105661011-105662100	fixed_Pab-Ppy	1089		2	0	1	2	0	0	2	2	2	2	1	2	1	2	2	2	2	0	2	2	2	1	2	0	2	2	2	0	2	0	2	0	2	2	2	2	2	2	2	2	2	2	1	3	2	2
chr11:106285060-106287095	fixed_Pab-Ppy	2035	GUCY1A2	2	0	2	3	0	0	2	2	2	2	2	2	2	2	2	2	2	0	2	3	1	2	2	0	2	2	2	0	2	0	2	0	2	1	2	3	2	2	2	2	2	1	2	2	2	2
chr11:106733662-106747695	fixed_Ppa-Ptre-Ptrs-Ptrt-Ptrv	14033	CWF19L2	0	2	2	2	2	2	2	0	2	0	0	2	2	2	2	1	2	2	0	2	2	0	2	2	0	0	2	2	0	2	2	2	2	2	0	2	0	2	2	2	2	2	0	1	0	0
chr11:106949836-106952244	fixed_Pab-Ppy	2408		2	0	2	2	0	0	2	2	2	2	1	2	2	2	2	2	2	0	2	2	2	2	2	0	2	2	2	0	2	0	2	0	2	2	2	2	2	2	2	2	2	2	2	2	2	2
chr11:107834965-107839199	fixed_Ppa-Ptre-Ptrs-Ptrt-Ptrv	4234	C11orf65	0	2	2	2	2	2	2	0	2	0	0	2	2	2	2	2	2	2	0	2	2	0	2	2	0	0	2	2	0	2	2	2	2	2	0	2	0	2	2	2	2	2	0	2	0	0
chr11:107844703-107846289	fixed_Pab-Ppy	1586		2	0	3	2	0	0	2	2	2	2	2	2	2	3	3	1	2	0	2	2	2	2	2	0	2	2	2	0	2	0	2	0	2	2	2	2	2	2	2	1	2	2	2	2	2	2
chr11:109554129-109555247	fixed_Ppa-Ptre-Ptrs-Ptrt-Ptrv	1118	RDX	0	2	2	2	2	2	2	0	2	0	0	2	2	3	2	2	2	2	0	3	2	0	2	2	0	0	3	2	0	2	2	2	2	2	0	2	0	2	2	2	2	2	0	3	0	0
chr11:110445750-110450487	fixed_Ptre-Ptrs-Ptrt-Ptrv	4737		0	2	2	2	2	2	2	2	2	0	0	2	2	2	2	2	2	2	2	2	2	0	2	2	0	0	2	2	0	2	2	2	2	2	2	2	0	2	2	2	2	2	2	2	2	2
chr11:112442513-112444200	fixed_Ppa-Ptre-Ptrs-Ptrt-Ptrv	1687	NCAM1	0	1	2	2	2	1	2	0	2	0	0	2	2	2	2	3	2	2	0	2	2	0	2	1	0	0	2	2	0	1	1	2	3	2	0	2	0	2	2	2	2	2	0	2	0	0
chr11:120155049-120161278	fixed_Pab-Ppy	6229	GRIK4	2	0	2	2	0	0	2	2	2	2	2	2	2	2	2	2	2	0	2	2	2	2	2	0	2	2	2	0	2	0	2	0	2	2	2	2	2	2	2	2	2	2	2	3	2	2
chr11:123606364-123639942	fixed_Pab-Ppy	33578	OR8G1,OR8G5	2	0	2	2	0	0	2	2	2	2	2	2	2	2	2	2	2	0	2	2	2	2	2	0	2	2	2	0	2	0	2	0	2	2	2	2	2	2	2	2	2	2	2	3	2	2
chr11:123641050-123650489	fixed_Pab-Ppy	9439		2	0	2	2	0	0	2	2	2	2	2	2	2	2	2	2	2	0	2	2	2	2	2	0	2	2	2	0	2	0	2	0	1	2	2	2	2	2	2	2	2	2	2	2	2	2
chr11:123678042-123683656	fixed_Pab-Ppy	5614		2	0	1	2	0	0	2	2	1	2	2	2	2	2	2	2	2	0	2	2	2	2	2	0	2	2	2	0	1	0	2	0	2	2	2	2	2	2	2	2	2	2	2	2	2	1
chr11:123711636-123717968	fixed_Ppa	6332		2	2	2	2	2	2	3	0	2	2	2	2	2	2	2	2	2	2	0	2	2	2	2	2	2	2	2	2	2	2	2	2	2	2	0	3	2	2	2	2	2	2	0	2	0	0
chr11:125076114-125099674	fixed_Gbeg-Ggod-Ggog	23560		2	2	0	0	2	2	0	2	0	2	2	0	0	3	0	0	0	2	2	0	0	2	0	2	2	2	0	2	2	2	0	2	0	0	2	0	2	0	0	0	0	0	2	2	2	2
chr11:126749061-126750061	fixed_Gbeg-Ggod-Ggog	1000		3	2	0	0	1	2	0	2	0	2	2	0	0	2	0	0	0	1	2	0	0	2	0	1	2	2	0	2	1	2	0	2	0	0	2	0	2	0	0	0	0	0	3	2	2	2
chr11:130889081-130890818	fixed_Gbeg-Ggod-Ggog	1737	NTM	2	2	0	0	3	3	0	3	0	2	2	0	0	2	0	0	0	2	3	0	0	2	0	3	2	2	0	2	2	3	0	3	0	0	3	0	2	0	0	0	0	0	2	3	2	3
chr11:131083748-131089820	fixed_Pab-Ppy	6072	NTM	2	0	2	2	0	0	2	2	2	2	1	2	2	2	2	2	2	0	2	2	2	2	2	0	2	2	2	0	2	0	2	0	2	2	2	2	2	2	2	2	2	2	2	2	2	2
chr11:133893421-133896327	fixed_Pab-Ppy	2906		2	0	2	2	0	0	2	2	2	2	2	2	2	2	2	2	2	0	2	2	2	2	2	0	2	2	2	0	2	0	2	0	2	2	2	2	2	2	2	2	2	2	2	3	2	2
chr11:134032274-134033957	Gbeg-Ggod-Ggog-Ppa-Ptre-Ptrs-Ptrt-Ptrv	1683		0	2	0	0	3	2	0	0	0	0	0	0	0	2	0	0	0	2	0	0	0	0	0	2	0	0	0	3	0	2	0	2	0	0	0	0	0	0	0	0	0	0	0	2	0	0
chr11:134221551-134226661	fixed_Pab-Ppy	5110		2	0	2	2	0	0	2	2	2	2	1	2	2	2	2	2	2	0	2	2	2	2	2	0	2	2	2	0	2	0	2	0	2	2	2	2	2	2	2	1	2	2	2	2	2	2
chr11:134278498-134282944	fixed_Ppy	4446		2	1	2	2	0	1	2	2	2	2	2	2	2	2	2	2	2	0	2	2	2	2	2	0	2	2	2	0	2	0	3	1	2	2	2	2	2	2	2	2	2	2	2	2	2	2
chr11:134316542-134349255	fixed_Ppa-Ptre-Ptrs-Ptrt-Ptrv	32713		0	2	2	2	2	2	2	0	2	0	0	2	2	4	2	2	2	2	0	2	2	0	2	2	0	0	2	2	0	2	2	2	2	2	0	2	0	2	2	2	2	2	0	4	0	0
chr11:134412689-134417969	fixed_Ptre-Ptrs-Ptrt-Ptrv	5280		0	3	2	2	3	3	1	2	2	0	0	2	2	2	2	2	2	2	2	2	2	0	2	3	0	0	2	3	0	2	2	3	2	2	2	2	0	2	2	2	2	2	2	2	2	2
chr11:134419885-134426326	fixed_Ppa-Ptre-Ptrs-Ptrt-Ptrv	6441		0	2	21	25	2	2	24	0	24	0	0	23	21	2	23	23	20	2	0	24	21	0	23	2	0	0	22	1	0	2	24	2	20	21	0	24	0	25	24	22	21	22	0	2	0	0
chr11:134434100-134448218	fixed_Gbeg-Ggod-Ggog	14118		2	2	0	0	2	2	0	2	0	2	1	0	0	2	0	0	0	2	2	0	0	2	0	2	2	2	0	2	2	2	0	2	0	0	2	0	2	0	0	0	0	0	2	2	2	2
chr12:68284-75060	fixed_Ppa-Ptre-Ptrs-Ptrt-Ptrv	6776	IQSEC3	0	2	2	2	2	2	2	0	3	0	0	2	3	2	2	2	2	2	0	4	2	0	2	2	0	0	2	2	0	2	2	2	2	2	0	2	0	2	2	2	2	2	0	3	0	0
chr12:1550994-1552004	fixed_Pab-Ppy	1010	FBXL14	1	0	2	2	0	0	2	2	3	2	2	2	2	2	2	2	2	0	2	2	2	2	2	0	2	2	3	0	2	0	1	0	2	2	2	2	2	2	2	2	2	2	2	3	2	2
chr12:3356982-3359944	fixed_Pab-Ppy	2962		2	0	2	2	0	0	2	2	2	2	2	2	2	2	2	2	2	0	2	2	2	2	2	0	2	2	2	0	2	0	2	0	2	2	2	2	2	2	2	2	2	2	2	2	2	2
chr12:7400431-7410623	fixed_Pab-Ppy	10192	CD163L1	2	0	1	2	0	0	2	2	2	2	2	2	2	2	2	2	2	0	2	2	2	2	2	0	2	2	2	0	2	0	2	0	2	2	2	2	2	2	2	2	2	2	2	3	2	2
chr12:9307744-9322628	fixed_Pab-Ppy	14884		2	0	2	2	0	0	2	2	2	2	2	2	2	2	2	2	2	0	2	2	2	2	2	0	2	2	2	0	2	0	2	0	2	2	2	2	2	2	2	2	2	2	2	2	2	2
chr12:9372912-9433257	fixed_Gbeg-Ggod-Ggog	60345		2	2	0	0	2	2	0	2	0	2	2	0	0	3	0	0	0	2	2	0	0	2	0	2	2	2	0	2	2	2	0	2	0	0	2	0	2	0	0	0	0	0	2	3	2	2
chr12:9743484-9785042	fixed_Pab-Ppy	41558	CLECL1	2	0	2	2	0	0	2	2	2	2	2	2	2	3	2	2	2	0	2	2	2	2	2	0	2	2	2	0	2	0	2	0	2	2	2	2	2	2	2	2	2	2	2	2	2	2
chr12:9993670-10005529	fixed_Gbeg-Ggod-Ggog	11859	CLEC12A	2	2	0	0	2	2	0	2	0	2	1	0	0	2	0	0	0	2	2	0	0	2	0	2	2	2	0	2	2	2	0	2	0	0	2	0	2	0	0	0	0	0	2	2	2	2
chr12:10839899-10841869	fixed_Pab-Ppy	1970		2	0	2	2	0	0	2	2	2	2	2	2	2	2	2	2	2	0	2	2	1	2	2	0	2	2	2	0	2	0	2	0	2	2	2	2	2	2	2	2	2	2	1	2	2	2
chr12:11242803-11260079	fixed_Gbeg	17276		2	2	2	2	2	2	2	2	2	2	2	2	2	2	2	2	2	2	2	2	2	2	0	2	2	2	2	2	2	2	2	2	2	2	2	2	2	2	2	2	2	2	2	2	2	2
chr12:11568213-11569452	fixed_Ppa	1239		2	2	2	2	2	2	2	0	2	3	2	2	2	2	2	2	2	2	0	2	2	2	2	2	2	2	2	2	2	2	2	2	2	2	0	2	2	2	2	2	2	2	0	3	0	0
chr12:14623442-14635926	fixed_Ppa-Ptre-Ptrs-Ptrt-Ptrv	12484		0	2	2	2	2	2	2	0	2	0	0	2	2	2	2	2	2	2	0	2	2	0	2	2	0	0	2	2	0	2	2	2	2	2	0	2	0	2	2	2	2	2	0	2	0	0
chr12:14797691-14799134	fixed_Ppa-Ptre-Ptrs-Ptrt-Ptrv	1443		0	2	2	2	2	2	2	0	2	0	0	2	2	2	2	2	2	2	0	2	2	0	2	2	0	0	1	2	0	2	2	2	2	2	0	2	0	2	2	1	2	2	0	2	0	0
chr12:15491736-15499468	fixed_Ppa-Ptre-Ptrs-Ptrt-Ptrv	7732	PTPRO	0	1	2	2	1	2	2	0	2	0	0	2	2	2	2	2	2	1	0	2	2	0	2	1	0	0	2	1	0	2	2	1	2	2	0	2	0	2	2	2	2	2	0	2	0	0
chr12:15533211-15538597	fixed_Gbeg-Ggod-Ggog	5386	PTPRO	2	2	0	0	2	2	0	2	0	2	1	0	0	2	0	0	0	2	2	0	0	2	0	2	2	2	0	2	2	2	0	2	0	0	2	0	2	0	0	0	0	0	2	2	2	2
chr12:16021419-16022379	fixed_Gbeg-Ggod-Ggog	960	DERA	2	2	0	0	2	2	0	2	0	2	2	0	0	2	0	0	0	2	2	0	0	2	0	2	2	2	0	2	2	2	0	2	0	0	2	0	2	0	0	0	0	0	2	2	2	2
chr12:16354432-16356588	fixed_Ptre-Ptrs-Ptrt-Ptrv	2156		0	2	1	2	2	2	2	2	2	0	0	2	2	2	2	2	2	2	2	2	2	0	2	2	0	0	2	2	0	2	2	2	2	2	2	2	0	2	2	2	2	2	2	2	2	2
chr12:17865566-17874832	Gbeg-Ggod-Ggog-Pab-Ppy	9266		2	0	0	0	0	0	0	2	0	2	2	0	0	2	0	0	0	0	2	0	0	2	0	0	2	1	0	0	2	0	0	0	0	0	2	0	2	0	0	0	0	0	2	2	2	2
chr12:17916765-17918731	fixed_Pab-Ppy	1966		2	0	2	2	0	0	2	2	2	2	2	2	2	2	2	2	2	0	2	2	2	2	2	0	2	2	2	0	2	0	2	0	2	2	2	2	2	2	2	2	2	2	2	3	2	2
chr12:18226564-18227564	fixed_Gbeg	1000		2	2	1	2	2	2	0	2	2	2	1	2	1	2	2	1	2	2	2	2	1	1	0	2	1	2	1	2	2	2	2	2	2	2	2	2	1	2	2	1	2	2	1	2	2	1
chr12:19290956-19291623	fixed_Pab-Ppy	667	PLEKHA5	2	0	2	2	0	0	2	2	2	2	2	2	2	2	2	1	2	0	2	2	1	2	2	0	2	2	1	0	2	0	2	0	2	2	2	2	2	1	2	1	2	2	2	2	2	2
chr12:19296135-19296985	fixed_Hde	850	PLEKHA5	2	1	2	2	1	1	2	2	2	2	1	2	2	2	2	2	2	1	2	2	2	1	2	1	1	2	2	1	2	1	2	1	2	2	2	2	2	2	1	2	2	2	2	2	2	2
chr12:20972873-20976719	fixed_Gbeg-Ggod-Ggog	3846		2	2	0	0	2	2	0	2	0	2	2	0	0	3	0	0	0	2	2	0	0	2	0	2	2	2	0	2	2	2	0	2	0	0	2	0	2	0	0	0	0	0	2	2	2	2
chr12:21284022-21296507	fixed_Pab-Ppy	12485		2	0	2	2	0	0	2	2	2	2	1	2	2	2	2	2	2	0	2	2	1	2	2	0	2	2	2	0	2	0	2	0	1	2	2	2	2	2	2	1	2	2	2	2	2	2
chr12:21388092-21388592	fixed_Pab-Ppy	500	SLCO1A2	2	0	1	2	0	0	2	2	2	2	2	2	2	2	2	2	2	0	2	2	2	2	2	0	2	2	2	0	1	0	3	0	2	2	2	2	2	2	2	2	2	2	2	2	2	2
chr12:23001567-23006051	fixed_Ptre-Ptrs-Ptrt-Ptrv	4484		0	2	2	2	2	2	2	2	1	0	0	2	2	2	2	2	2	2	2	2	1	0	2	2	0	0	1	1	0	2	2	2	2	2	2	2	0	2	2	1	2	2	2	2	2	2
chr12:26930560-26933882	fixed_Pab-Ppy	3322		2	0	2	2	0	0	2	2	2	2	2	2	2	2	2	2	2	0	2	2	2	2	2	0	2	2	2	0	2	0	2	0	1	2	2	2	2	2	2	2	2	2	2	2	2	2
chr12:28523967-28527485	fixed_Ptre-Ptrs-Ptrt-Ptrv	3518	CCDC91	0	2	2	2	2	2	2	2	2	0	0	2	2	2	2	2	2	2	2	2	2	0	2	2	0	0	2	2	0	2	2	2	2	2	2	2	0	2	2	2	2	2	2	2	2	2
chr12:28561676-28581379	fixed_Pab-Ppy	19703	CCDC91	2	0	2	2	0	0	2	2	2	2	2	2	2	2	2	2	2	0	2	2	2	2	2	0	2	2	2	0	2	0	2	0	2	2	2	2	2	2	2	2	2	2	2	2	2	2
chr12:29151076-29167669	fixed_Pab-Ppy	16593		2	0	2	2	0	0	2	2	2	2	2	2	2	2	2	2	2	0	2	2	2	2	2	0	2	2	2	0	2	0	2	0	2	2	2	2	2	2	2	2	2	2	2	2	2	2
chr12:29249319-29249819	fixed_Gbeg-Ggod-Ggog	500		2	2	0	0	2	2	0	2	0	2	2	0	0	3	0	0	0	2	2	0	0	2	0	2	2	2	0	2	2	2	0	2	0	0	2	0	2	0	0	0	0	0	2	2	2	2
chr12:30944097-30948800	fixed_Pab-Ppy	4703		2	0	2	2	0	0	2	2	2	2	2	2	2	3	2	3	3	0	2	2	2	2	3	0	3	3	2	0	2	0	2	0	2	2	2	2	2	2	2	2	2	2	2	2	2	2
chr12:31592883-31604013	fixed_Pab-Ppy	11130	DENND5B	2	0	2	2	0	0	2	2	2	2	2	2	2	2	2	2	2	0	2	2	2	2	2	0	2	2	2	0	2	0	2	0	2	2	2	2	2	2	2	2	2	2	2	2	2	2
chr12:31608688-31616507	fixed_Pab-Ppy	7819	DENND5B	2	0	2	3	0	0	2	2	2	2	2	2	2	2	2	2	2	0	2	2	2	2	2	0	2	2	2	0	2	0	2	0	2	2	2	2	2	2	2	1	2	2	2	2	2	2
chr12:32808488-32811188	fixed_Pab-Ppy	2700		1	0	2	1	0	0	1	1	1	2	1	2	1	2	1	2	2	0	1	1	2	2	2	0	2	2	2	0	1	0	2	0	1	2	1	1	2	1	2	2	1	2	2	2	1	2
chr12:34135159-34140120	fixed_Pab-Ppy	4961		4	0	3	3	0	0	4	4	3	3	3	3	3	3	3	4	3	0	3	4	3	4	3	0	3	4	3	0	3	0	4	0	3	3	4	4	3	4	4	3	3	3	4	3	4	4
chr12:37139212-37147115	fixed_Pab-Ppy	7903		3	0	3	3	0	0	3	3	3	3	2	3	3	3	3	3	3	0	3	4	3	3	3	0	3	3	3	0	3	0	4	0	3	3	3	4	3	3	3	3	3	3	3	4	3	3
chr12:37807851-37816129	fixed_Ppa-Ptre-Ptrs-Ptrt-Ptrv	8278		0	2	2	2	2	2	2	0	2	0	0	2	2	2	2	2	2	2	0	2	2	0	2	2	0	0	2	2	0	2	2	2	2	2	0	2	0	2	2	2	2	2	0	2	0	0
chr12:39083668-39089246	fixed_Pab-Ppy	5578		2	0	1	1	0	0	1	2	1	2	2	1	1	2	1	1	1	0	2	1	1	2	1	0	2	2	1	0	2	0	1	0	1	1	2	1	2	1	1	1	1	1	2	2	2	2
chr12:39600487-39601320	fixed_Pab-Ppy	833	CNTN1	2	0	2	2	0	0	2	1	2	2	1	2	2	2	2	1	2	0	1	2	2	2	2	0	2	2	2	0	2	0	2	0	2	2	1	2	2	2	2	2	2	1	2	3	1	2
chr12:40444942-40447955	fixed_Pab-Ppy	3013		2	0	2	2	0	0	2	2	2	2	1	2	3	3	2	3	2	0	2	2	2	2	2	0	2	2	2	0	2	0	2	0	2	2	2	3	2	2	2	2	2	2	2	2	2	2
chr12:41989304-41990364	fixed_Ptrs	1060		2	2	2	3	3	3	2	2	2	2	2	2	2	2	2	2	2	2	2	3	3	2	2	2	1	1	2	2	1	2	2	3	2	2	2	2	0	2	2	2	1	2	2	3	2	2
chr12:42110096-42112336	fixed_Ppa-Ptre-Ptrs-Ptrt-Ptrv	2240	ADAMTS20	0	2	2	2	2	2	2	0	2	0	0	2	1	2	2	2	2	2	0	2	2	0	2	2	0	0	2	2	0	2	2	2	2	2	0	2	0	2	2	2	2	2	0	2	0	0
chr12:42873093-42878475	fixed_Gbeg-Ggod-Ggog	5382	TMEM117	2	2	0	0	2	2	0	2	0	2	2	0	0	2	0	0	0	2	2	0	0	2	0	2	2	2	0	2	2	2	0	2	0	0	2	0	2	0	0	0	0	0	2	2	2	2
chr12:43111884-43113146	fixed_Ggod-Ggog	1262		2	2	0	0	2	2	0	2	0	2	2	0	0	2	0	0	0	2	2	0	0	2	2	2	2	2	0	2	2	2	0	2	0	0	2	0	2	0	0	0	0	0	2	2	2	2
chr12:44118118-44125280	fixed_Ppa	7162	ANO6	2	2	2	2	2	3	2	0	2	2	2	2	2	2	2	2	2	2	0	2	2	2	2	2	2	2	2	3	2	2	2	2	2	2	0	2	2	2	2	2	2	2	0	2	0	0
chr12:45000117-45000897	fixed_Gbeg-Ggod-Ggog	780		2	2	0	0	2	2	0	2	0	2	1	0	0	2	0	0	0	1	2	0	0	1	0	2	2	2	0	1	1	2	0	2	0	0	2	0	2	0	0	0	0	0	2	2	2	2
chr12:45007709-45008931	fixed_Ptre-Ptrs-Ptrt-Ptrv	1222		0	2	2	2	2	2	2	2	1	0	0	2	2	2	2	1	2	2	2	2	1	0	2	2	0	0	1	1	0	2	2	2	2	2	2	2	0	2	2	1	2	2	2	2	2	2
chr12:45720019-45721341	fixed_Pab-Ppy	1322		2	0	2	2	0	0	2	2	2	2	2	2	2	2	2	2	2	0	2	2	2	2	2	0	2	2	2	0	2	0	2	0	2	2	2	2	2	2	2	2	2	2	2	3	2	2
chr12:45851483-45853740	fixed_Pab-Ppy	2257		2	0	2	2	0	0	2	2	2	2	2	2	2	2	2	2	2	0	2	2	2	2	2	0	2	2	2	0	3	0	2	0	2	2	2	2	2	2	2	2	2	2	2	2	2	2
chr12:47160247-47167766	fixed_Ppa-Ptre-Ptrs-Ptrt-Ptrv	7519	C12orf54	0	2	2	2	2	2	2	0	2	0	0	2	2	2	2	2	2	2	0	2	2	0	2	2	0	0	2	2	0	2	2	2	2	2	0	2	0	2	2	2	2	2	0	2	0	0
chr12:47168682-47179315	fixed_Ppa-Ptre-Ptrs-Ptrt-Ptrv	10633	C12orf54	0	2	2	2	2	2	2	0	2	0	0	2	2	2	2	2	2	2	0	2	2	0	2	2	0	0	2	2	0	2	2	2	2	2	0	2	0	2	2	2	2	2	0	2	0	0
chr12:52233881-52238902	fixed_Ggod	5021	ATF7	2	2	2	1	2	2	2	2	2	2	1	3	2	2	2	1	2	2	2	2	3	2	2	2	2	2	1	2	2	2	0	2	2	2	2	2	2	2	1	1	1	2	2	2	2	2
chr12:53115940-53117467	fixed_Ppa-Ptre-Ptrs-Ptrt-Ptrv	1527		0	2	2	1	2	2	2	0	2	0	0	2	2	3	2	2	2	3	0	1	2	0	1	2	0	0	2	2	0	2	2	2	2	2	0	2	0	2	2	2	2	2	0	3	0	0
chr12:53288330-53290309	fixed_Pab-Ppy	1979	GLYCAM1	2	0	2	2	0	0	2	2	2	2	2	2	2	2	2	2	2	0	2	2	2	2	2	0	2	2	2	0	2	0	2	0	2	2	2	2	2	2	2	2	2	2	2	2	3	2
chr12:53454591-53480961	fixed_Pab-Ppy	26370		2	0	2	2	0	0	2	2	2	2	2	2	2	2	2	2	2	0	2	2	2	2	2	0	2	2	2	0	2	0	2	0	2	2	2	2	2	2	2	2	2	2	2	2	2	2
chr12:53658842-53660372	fixed_Pab-Ppy	1530	TESPA1	2	0	2	2	0	0	2	2	2	1	1	2	2	2	2	2	1	0	2	2	2	2	2	0	1	2	2	0	1	0	2	0	2	2	2	2	2	2	2	2	2	2	2	3	2	2
chr12:53830454-53849365	fixed_Gbeg-Ggod-Ggog	18911		2	2	0	0	2	2	0	2	0	2	1	0	0	2	0	0	0	2	2	0	0	2	0	2	2	2	0	2	2	2	0	2	0	0	2	0	2	0	0	0	0	0	2	2	2	2
chr12:53939902-53960947	fixed_Ppa-Ptre-Ptrs-Ptrt-Ptrv	21045		0	2	2	2	2	2	2	0	2	0	0	2	2	2	2	2	2	1	0	2	2	0	2	2	0	0	2	2	0	2	2	2	2	2	0	2	0	2	2	2	2	2	0	2	0	0
chr12:54009868-54083382	fixed_Ppa-Ptre-Ptrs-Ptrt-Ptrv	73514	OR6C3,OR6C75,OR6C65	0	2	2	2	2	3	2	0	2	0	0	2	2	2	2	2	2	2	0	2	2	0	2	2	0	0	2	2	0	2	2	3	2	2	0	2	0	2	2	2	2	2	0	2	0	0
chr12:54101563-54105747	fixed_Ppa-Ptre-Ptrs-Ptrt-Ptrv	4184		0	2	2	2	2	2	2	0	2	0	0	2	2	2	2	2	2	2	0	2	2	0	2	2	0	0	1	2	0	2	2	2	2	2	0	2	0	2	2	1	2	2	0	2	0	0
chr12:54105747-54110203	Gbeg-Ggod-Ggog-Ppa-Ptre-Ptrs-Ptrt-Ptrv	4456	OR6C76	0	2	0	0	2	2	0	0	0	0	0	0	0	2	0	0	0	2	0	0	0	0	0	2	0	0	0	2	0	2	0	2	0	0	0	0	0	0	0	0	0	0	0	2	0	0
chr12:54110203-54150248	fixed_Ppa-Ptre-Ptrs-Ptrt-Ptrv	40045	OR6C2,OR6C70	0	2	2	2	2	2	2	0	2	0	0	2	2	2	2	2	2	2	0	2	2	0	2	2	0	0	2	2	0	2	2	2	2	2	0	2	0	2	2	2	2	2	0	2	0	0
chr12:54150248-54153893	Ppa-Ptre-Ptrs-Ptrt-Ptrv-Pab-Ppy	3645		0	0	2	2	0	0	2	0	2	0	0	2	2	2	2	1	2	0	0	2	2	0	2	0	0	0	1	0	0	0	2	0	2	2	0	2	0	2	2	2	2	2	0	2	0	0
chr12:54153893-54162673	fixed_Ppa-Ptre-Ptrs-Ptrt-Ptrv	8780		0	2	2	2	2	2	2	0	2	0	0	2	2	2	2	1	2	2	0	2	2	0	2	2	0	0	2	2	0	2	2	2	2	2	0	2	0	2	2	2	2	2	0	3	0	0
chr12:54195235-54219061	fixed_Ppa-Ptre-Ptrs-Ptrt-Ptrv	23826		0	2	2	2	1	2	2	0	2	0	0	2	2	3	2	2	2	2	0	2	2	0	2	2	0	0	2	1	0	2	2	2	2	2	0	2	0	2	2	2	2	2	0	2	0	0
chr12:54286947-54297532	fixed_Pab-Ppy	10585		2	0	2	2	0	0	2	2	2	2	2	2	2	2	2	2	2	0	2	2	2	2	2	0	2	2	2	0	2	0	2	0	2	2	2	2	2	2	2	2	2	2	2	2	2	2
chr12:57120739-57123974	fixed_Ptre-Ptrv	3235		0	2	2	2	2	2	2	2	2	0	0	2	3	2	2	2	2	2	2	2	2	0	2	2	0	0	2	2	2	3	2	2	2	2	2	2	2	2	2	2	2	3	2	2	2	2
chr12:59563011-59572718	fixed_Ppa-Ptre-Ptrs-Ptrt-Ptrv	9707		0	1	2	2	1	1	2	0	2	0	0	2	2	2	2	2	2	1	0	2	2	0	2	1	0	0	1	2	0	1	2	2	2	2	0	2	0	2	2	2	2	2	0	2	0	0
chr12:59594556-59595485	fixed_Pab-Ppy	929		2	0	2	2	0	0	2	2	3	2	2	2	2	2	2	2	1	0	3	2	2	2	2	0	2	2	2	0	2	0	2	0	2	2	2	3	2	2	2	2	2	2	2	2	2	2
chr12:59785050-59789650	fixed_Ppa	4600		2	2	1	2	2	2	2	0	2	2	2	2	2	2	2	2	2	2	0	2	2	2	2	2	2	2	2	2	1	2	2	2	2	2	0	2	1	2	2	2	2	2	0	2	0	0
chr12:63769547-63771544	fixed_Gbeg-Ggod-Ggog	1997	WIF1	2	2	0	0	2	2	0	2	0	1	1	0	0	2	0	0	0	1	2	0	0	2	0	2	2	2	0	2	1	2	0	2	0	0	2	0	2	0	0	0	0	0	1	2	2	2
chr12:64200282-64203208	fixed_Ppa	2926		2	2	2	1	2	2	2	0	1	2	1	2	2	2	2	2	2	2	0	2	2	2	2	2	2	2	2	3	2	2	2	2	2	2	0	2	2	2	2	2	2	2	0	2	0	0
chr12:64302513-64307135	fixed_Ppy	4622		2	2	1	2	0	2	2	2	2	2	2	2	2	2	2	2	2	0	2	2	2	2	2	0	2	2	2	0	2	0	2	2	2	3	2	2	2	2	2	2	2	2	2	2	2	2
chr12:65677633-65680603	fixed_Pab-Ppy	2970		2	0	2	1	0	0	2	2	2	2	2	2	2	2	2	2	2	0	2	2	1	2	2	0	1	2	1	0	2	0	2	0	2	2	2	2	2	2	2	1	2	1	2	2	2	2
chr12:71158495-71160785	fixed_Pab-Ppy	2290	TRHDE	2	0	2	2	0	0	2	2	2	2	2	2	2	2	2	2	2	0	2	2	2	2	2	0	2	2	2	0	2	0	2	0	2	2	2	2	2	2	2	2	2	2	2	2	2	2
chr12:72656706-72657706	fixed_Ppa-Ptre-Ptrs-Ptrt-Ptrv	1000		0	2	2	2	2	2	2	0	2	0	0	2	2	2	3	1	2	2	0	1	2	0	2	2	0	0	2	2	0	2	2	2	2	2	0	2	0	2	2	2	2	2	0	2	0	0
chr12:74216655-74223657	fixed_Ppa	7002		2	2	2	2	2	2	2	0	2	2	1	2	2	2	2	2	2	2	0	2	2	2	2	2	2	2	2	2	2	2	2	2	2	2	0	2	2	2	2	2	2	2	0	2	0	0
chr12:74647030-74650876	fixed_Ppa-Ptre-Ptrs-Ptrt-Ptrv	3846		0	2	2	2	2	2	2	0	2	0	0	2	2	2	2	2	2	2	0	2	2	0	2	2	0	0	2	2	0	2	2	2	2	2	0	2	0	2	2	2	2	2	0	2	0	0
chr12:75248554-75250819	fixed_Gbeg-Ggod-Ggog	2265		2	2	0	0	2	2	0	2	0	2	1	0	0	2	0	0	0	2	2	0	0	2	0	2	2	2	0	1	2	2	0	2	0	0	2	0	2	0	0	0	0	0	2	3	2	2
chr12:75985239-75998296	fixed_Pab-Ppy	13057		2	0	2	2	0	0	2	2	2	2	2	2	2	2	2	2	2	0	2	2	2	2	2	0	2	2	2	0	2	0	2	0	2	2	2	2	2	2	2	2	2	2	2	2	2	2
chr12:77820789-77823815	fixed_Gbeg-Ggod-Ggog	3026	SYT1	2	2	0	0	2	2	0	2	0	2	1	0	0	2	0	0	0	1	2	0	0	2	0	2	1	2	0	2	2	2	0	2	0	0	2	0	1	0	0	0	0	0	2	2	2	2
chr12:78867054-78875704	fixed_Pab-Ppy	8650		2	0	2	2	0	0	2	2	2	2	2	2	2	2	2	2	2	0	2	2	2	2	2	0	2	2	2	0	2	0	2	0	2	2	2	2	2	2	2	2	2	2	1	2	2	2
chr12:79967898-79974053	fixed_Ppa	6155		2	2	2	2	2	2	2	0	2	2	2	2	2	2	2	2	2	2	0	2	2	2	2	2	2	2	2	2	2	2	2	2	2	2	0	2	2	2	2	2	2	2	0	2	0	0
chr12:81045990-81047751	fixed_Pab-Ppy	1761		2	0	2	2	0	0	2	2	2	2	2	2	2	3	2	1	2	0	2	2	2	2	2	0	2	2	2	0	2	0	3	0	2	2	2	2	1	2	2	2	2	2	3	2	2	2
chr12:82908819-82909319	fixed_Pab-Ppy	500		2	0	1	2	0	0	1	2	2	2	2	2	1	2	2	2	1	0	2	2	1	2	1	0	2	2	2	0	1	0	2	0	2	1	2	2	2	2	2	2	1	1	2	2	2	2
chr12:83278612-83283308	fixed_Pab-Ppy	4696	MIR548T	2	0	2	1	0	0	1	2	2	2	1	2	2	2	1	2	2	0	1	1	2	2	2	0	2	2	2	0	2	0	1	0	2	2	2	1	2	2	2	2	2	2	2	2	1	2
chr12:83553659-83557131	fixed_Gbeg	3472	MIR548T	2	2	2	2	2	2	2	2	2	2	1	2	2	2	2	2	2	2	2	2	2	2	0	2	1	2	1	2	1	2	2	2	2	2	2	2	2	1	2	2	2	2	2	2	2	2
chr12:83583424-83595663	fixed_Pab-Ppy	12239		2	0	2	2	0	0	2	2	2	2	2	2	2	2	2	2	2	0	2	2	2	2	2	0	2	2	2	0	2	0	2	0	2	2	2	2	2	2	2	2	2	2	2	2	2	2
chr12:83897320-83902111	fixed_Ppa-Ptre-Ptrs-Ptrt-Ptrv	4791		0	2	2	2	2	2	3	0	2	0	0	2	2	2	2	2	2	2	0	2	2	0	2	2	0	0	2	1	0	2	2	2	2	2	0	2	0	2	2	2	2	2	0	2	0	0
chr12:85291278-85298125	fixed_Pab-Ppy	6847	MGAT4C	2	0	2	2	0	0	2	2	2	2	2	2	2	2	2	2	2	0	2	2	2	2	2	0	2	2	2	0	2	0	2	0	2	2	2	2	1	2	2	2	2	2	2	2	2	2
chr12:90553901-90556299	fixed_Pab-Ppy	2398		2	0	2	2	0	0	2	2	2	2	2	2	2	2	2	1	2	0	2	2	2	2	2	0	2	2	2	0	3	0	2	0	2	1	2	2	2	2	2	1	2	2	2	2	2	2
chr12:94481227-94484940	fixed_Pab-Ppy	3713		2	0	2	2	0	0	2	2	2	2	2	2	2	2	2	2	2	0	2	2	2	2	1	0	2	2	2	0	2	0	1	0	2	1	2	2	2	2	2	2	2	2	2	2	2	2
chr12:94863245-94867780	fixed_Pab-Ppy	4535	AMDHD1	2	0	2	2	0	0	2	2	2	2	1	2	2	2	2	2	2	0	2	2	2	2	2	0	2	2	2	0	2	0	2	0	2	1	2	1	2	2	2	2	2	2	1	3	2	1
chr12:95535494-95538067	fixed_Pab-Ppy	2573		2	0	2	2	0	0	2	2	2	2	2	2	2	2	2	2	2	0	2	2	2	2	2	0	2	2	2	0	2	0	2	0	2	2	2	2	2	2	2	2	2	2	2	2	2	2
chr12:100561257-100561847	fixed_Ppa	590	MYBPC1	2	2	3	2	2	2	2	0	2	2	2	2	2	2	2	2	1	2	0	1	1	1	1	2	2	2	2	2	3	1	2	2	2	2	0	2	2	1	2	2	2	2	0	2	0	0
chr12:102064916-102068706	fixed_Gbeg-Ggod-Ggog	3790		2	2	0	0	2	2	0	2	0	2	2	0	0	2	0	0	0	2	2	0	0	2	0	2	2	2	0	2	2	2	0	2	0	0	2	0	2	0	0	0	0	0	2	2	2	2
chr12:105471190-105474772	fixed_Gbeg-Ggod-Ggog	3582	LOC100287944	2	2	0	0	2	2	0	2	0	2	2	0	0	3	0	0	0	2	2	0	0	2	0	2	2	2	0	2	2	2	0	2	0	0	2	0	2	0	0	0	0	0	2	2	2	2
chr12:105480135-105483326	fixed_Pab-Ppy	3191	LOC100287944	2	0	2	2	0	0	2	2	2	2	2	2	2	2	2	2	2	0	2	2	2	2	2	0	2	2	2	0	2	0	2	0	2	2	2	2	2	2	2	2	2	2	2	2	2	2
chr12:105483326-105487622	fixed_Gbeg-Ggod-Ggog	4296	LOC100287944	2	2	0	0	2	2	0	2	0	2	2	0	0	2	0	0	0	1	2	0	0	2	0	2	2	2	0	1	2	1	0	2	0	0	2	0	2	0	0	0	0	0	2	2	2	2
chr12:105549764-105552530	fixed_Ppa	2766	LOC100287944,RFX4	2	1	1	2	1	1	2	0	2	1	1	2	2	2	2	1	2	2	0	2	2	1	2	1	2	2	2	1	2	1	2	1	2	2	0	2	1	2	1	1	1	2	0	1	0	0
chr12:105718906-105726879	fixed_Gbeg-Ggod-Ggog	7973	RIC8B	2	2	0	0	2	2	0	2	0	2	2	0	0	2	0	0	0	2	2	0	0	2	0	2	2	2	0	2	2	2	0	2	0	0	2	0	2	0	0	0	0	0	2	3	2	2
chr12:106798678-106801335	fixed_Ppa-Ptre-Ptrs-Ptrt-Ptrv	2657		0	3	2	2	2	3	2	0	2	0	0	2	2	3	2	2	2	2	0	2	2	0	2	2	0	0	2	3	0	3	2	3	2	2	0	2	0	2	2	2	2	2	0	3	0	0
chr12:108190985-108194010	fixed_Gbeg-Ggod-Ggog	3025		2	2	0	0	2	2	0	2	0	2	2	0	0	2	0	0	0	2	2	0	0	2	0	2	2	2	0	2	2	2	0	2	0	0	2	0	2	0	0	0	0	0	2	2	2	2
chr12:108284102-108285962	fixed_Pab-Ppy	1860		2	0	3	2	0	0	2	2	2	2	2	2	2	2	2	2	2	0	2	2	2	2	2	0	2	2	2	0	3	0	2	0	2	2	2	2	2	2	2	2	2	2	2	2	2	2
chr12:111847003-111854091	fixed_Gbeg	7088		2	2	2	2	2	2	1	2	2	2	2	1	2	3	2	1	2	2	2	2	1	2	0	2	2	2	1	2	2	2	1	2	1	1	2	1	2	2	2	1	1	2	2	2	2	2
chr12:112964351-112965652	fixed_Ppa-Ptre-Ptrs-Ptrt-Ptrv	1301		0	2	1	2	2	2	2	0	2	0	0	2	2	2	2	2	1	2	0	2	2	0	2	2	0	0	2	2	0	2	2	2	2	2	0	2	0	2	1	2	1	2	0	2	0	0
chr12:114922322-114922822	fixed_Pab-Ppy	500	MED13L	2	0	2	2	0	0	2	2	2	2	2	2	2	2	2	2	2	0	2	3	1	2	2	0	2	3	2	0	2	0	2	0	2	1	3	3	2	2	2	3	2	1	2	3	2	2
chr12:120330725-120332403	fixed_Pab-Ppy	1678	RNF34	2	0	2	2	0	0	2	2	2	2	1	3	2	2	2	2	2	0	2	2	2	2	2	0	2	2	2	0	2	0	2	0	2	2	2	2	2	2	2	2	2	2	2	2	2	2
chr12:126268037-126287484	fixed_Ppa-Ptre-Ptrs-Ptrt-Ptrv	19447		0	2	2	2	2	2	2	0	2	0	0	2	2	2	2	2	2	1	0	2	2	0	2	2	0	0	2	2	0	2	2	2	2	2	0	2	0	2	2	2	2	2	0	2	0	0
chr12:127233990-127240975	fixed_Ppa-Ptre-Ptrs-Ptrt-Ptrv	6985		0	2	2	2	2	2	2	0	2	0	0	2	2	2	2	2	1	2	0	2	2	0	2	2	0	0	2	2	0	2	2	2	2	2	0	2	0	2	2	2	2	2	0	2	0	0
chr12:127302809-127309826	fixed_Pab-Ppy	7017		2	0	2	2	0	0	2	2	2	2	2	2	2	2	2	2	2	0	2	2	2	2	2	0	2	2	2	0	2	0	2	0	2	2	2	2	2	2	2	2	2	2	2	2	2	2
chr12:128267348-128272438	fixed_Pab-Ppy	5090	TMEM132D	2	0	2	2	0	0	2	2	2	2	2	2	2	2	2	2	2	0	2	2	2	2	2	0	2	2	2	0	2	0	2	0	2	2	2	2	2	2	2	2	2	2	2	2	2	2
chr12:130315122-130318316	fixed_Ppa-Ptre-Ptrs-Ptrt-Ptrv	3194		0	1	2	2	1	1	1	0	2	0	0	2	2	3	2	2	2	2	0	1	2	0	2	2	0	0	2	1	0	1	2	1	2	2	0	1	0	2	2	2	2	2	0	3	0	0
chr12:130866745-130868072	fixed_Gbeg	1327		2	1	2	1	1	2	1	2	2	2	1	2	2	2	2	2	2	1	2	2	2	2	0	1	2	2	2	2	2	1	1	2	2	2	2	1	2	2	2	2	2	2	2	2	2	2
chr12:131205857-131232788	fixed_Ppa	26931		2	1	1	1	2	1	1	0	1	2	2	2	1	2	1	2	2	1	0	1	1	2	1	1	2	2	2	1	1	1	1	1	2	1	0	1	2	1	1	2	2	2	0	2	0	0
chr13:18093171-18110306	fixed_Pab-Ppy	17135		6	0	12	15	0	0	13	5	12	5	5	15	12	14	12	12	14	0	6	12	11	5	10	0	5	5	13	0	5	0	14	0	13	14	5	13	6	13	10	13	14	12	5	8	6	5
chr13:18693285-18730583	fixed_Pab-Ppy	37298		2	0	3	5	0	0	4	2	3	2	2	6	4	3	4	4	6	0	2	4	4	2	3	0	2	2	5	0	2	0	5	0	4	5	2	4	2	4	4	4	5	4	2	3	2	2
chr13:21547498-21551549	fixed_Hde	4051		2	2	2	2	2	2	2	2	2	2	2	2	2	2	2	2	2	2	2	2	2	2	2	2	2	2	2	2	2	2	2	2	2	2	2	2	2	2	2	2	2	2	2	2	2	2
chr13:22462576-22465003	fixed_Gbeg-Ggod-Ggog	2427		2	2	0	0	2	2	0	2	0	2	2	0	0	2	0	0	0	1	2	0	0	2	0	2	2	2	0	1	2	2	0	2	0	0	2	0	2	0	0	0	0	0	2	2	2	2
chr13:24225549-24231766	fixed_Gbeg-Ggod-Ggog	6217		2	4	0	0	2	4	0	2	0	2	2	0	0	2	0	0	0	2	2	0	0	2	0	2	2	2	0	2	2	2	0	3	0	0	2	0	2	0	0	0	0	0	2	3	2	2
chr13:26006206-26007018	fixed_Pab-Ppy	812		2	0	2	2	0	0	2	3	2	2	2	2	1	2	2	2	2	0	2	2	1	2	2	0	2	2	2	0	2	0	2	0	2	2	2	2	2	2	2	2	2	1	2	2	2	2
chr13:26871181-26871681	fixed_Pab-Ppy	500		2	0	2	2	0	0	3	2	2	2	2	2	2	3	2	2	2	0	2	2	2	2	2	0	2	2	2	0	2	0	2	0	2	2	2	3	2	2	3	3	2	2	2	2	2	2
chr13:30065362-30067264	fixed_Pab-Ppy	1902		2	0	2	2	0	0	1	2	1	2	2	1	2	2	1	1	2	0	2	1	2	2	2	0	2	2	2	0	2	0	1	0	2	1	2	1	2	1	1	2	2	2	2	2	2	2
chr13:30835427-30843359	fixed_Gbeg-Ggod-Ggog	7932		2	2	0	0	1	2	0	2	0	2	2	0	0	2	0	0	0	2	2	0	0	2	0	2	2	2	0	1	2	2	0	2	0	0	2	0	2	0	0	0	0	0	2	2	2	2
chr13:31277048-31281198	fixed_Pab-Ppy	4150		2	0	2	2	0	0	2	2	2	2	2	2	2	2	2	2	2	0	2	2	2	2	2	0	2	2	2	0	2	0	3	0	2	2	2	2	2	2	2	2	2	2	2	2	2	2
chr13:33430808-33431806	fixed_Ppa-Ptre-Ptrs-Ptrt-Ptrv	998	RFC3	0	2	2	2	3	2	2	0	3	0	0	2	2	2	2	3	2	2	0	2	2	0	2	2	0	0	2	1	0	2	2	2	2	2	0	2	0	2	2	2	2	2	0	2	0	0
chr13:33446585-33451317	fixed_Gbeg-Ggod-Ggog	4732		2	2	0	0	2	2	0	2	0	2	2	0	0	2	0	0	0	2	2	0	0	2	0	2	2	2	0	2	2	2	0	2	0	0	2	0	2	0	0	0	0	0	2	2	2	2
chr13:34295288-34302073	fixed_Gbeg-Ggod-Ggog	6785		2	2	0	0	2	2	0	2	0	2	2	0	0	2	0	0	0	2	2	0	0	2	0	2	2	2	0	2	1	2	0	2	0	0	2	0	2	0	0	0	0	0	2	2	2	2
chr13:34774086-34778817	Gbeg-Ggod-Ggog-Ppa-Ptre-Ptrs-Ptrt-Ptrv	4731	NBEA	0	2	0	0	2	2	0	0	0	0	0	0	0	3	0	0	0	2	0	0	0	0	0	2	0	0	0	2	0	2	0	2	0	0	0	0	0	0	0	0	0	0	0	2	0	0
chr13:34783358-34804345	fixed_Ppa-Ptre-Ptrs-Ptrt-Ptrv	20987	NBEA	0	2	2	2	2	2	2	0	2	0	0	2	2	2	2	2	2	2	0	2	2	0	2	2	0	0	2	2	0	2	2	2	2	2	0	2	0	2	2	2	2	2	0	2	0	0
chr13:35088086-35089735	fixed_Ppa-Ptre-Ptrs-Ptrt-Ptrv	1649	NBEA,MIR548F5	0	2	2	2	2	2	2	0	2	0	0	2	2	2	2	2	2	2	0	2	2	0	2	2	0	0	2	2	0	2	2	2	2	2	0	2	0	2	2	2	2	2	0	2	0	0
chr13:36090259-36092793	fixed_Ppa-Ptre-Ptrs-Ptrt-Ptrv	2534		0	2	2	2	2	2	2	0	2	0	0	2	2	2	2	2	2	2	0	2	2	0	2	2	0	0	2	2	0	2	2	2	2	2	0	2	0	2	2	2	2	1	0	2	0	0
chr13:36247859-36254443	fixed_Ppa-Ptre-Ptrs-Ptrt-Ptrv	6584		0	2	2	2	2	2	2	0	2	0	0	2	2	2	2	2	2	2	0	2	2	0	2	2	0	0	2	2	0	2	2	2	2	2	0	2	0	2	2	2	2	2	0	2	0	0
chr13:36396072-36397915	fixed_Ppa-Ptre-Ptrs-Ptrt-Ptrv	1843		0	1	1	1	1	1	1	0	2	0	0	1	1	2	1	1	2	1	0	2	1	0	1	2	0	0	1	1	0	1	1	1	1	1	0	1	0	2	1	1	1	1	0	2	0	0
chr13:36827616-36828929	fixed_Pab-Ppy	1313		2	0	2	2	0	0	2	2	2	2	2	2	2	2	2	1	2	0	2	2	2	2	2	0	2	2	2	0	2	0	2	0	2	1	2	2	1	2	2	2	2	2	2	2	2	2
chr13:37955172-37958403	fixed_Gbeg-Ggod-Ggog	3231		2	2	0	0	2	2	0	2	0	2	2	0	0	2	0	0	0	2	2	0	0	2	0	2	2	2	0	2	2	2	0	2	0	0	2	0	2	0	0	0	0	0	2	1	2	2
chr13:38419369-38424140	Gbeg-Ggod-Ggog-Pab-Ppy	4771		2	0	0	0	0	0	0	2	0	2	2	0	0	2	0	0	0	0	2	0	0	2	0	0	2	2	0	0	2	0	0	0	0	0	2	0	2	0	0	0	0	0	2	2	2	2
chr13:38424140-38435714	fixed_Pab-Ppy	11574		2	0	2	2	0	0	2	2	2	2	1	2	2	2	2	2	2	0	2	2	2	2	2	0	2	2	2	0	2	0	2	0	2	2	2	2	2	2	2	2	2	2	2	2	2	2
chr13:39110254-39120784	fixed_Ptre-Ptrs-Ptrt-Ptrv	10530		0	2	2	2	2	2	2	2	2	0	0	2	2	2	2	2	2	2	2	2	2	0	2	2	0	0	2	2	0	2	2	2	2	2	2	2	0	2	2	2	2	2	2	3	2	2
chr13:40865484-40903525	fixed_Ppa-Ptre-Ptrs-Ptrt-Ptrv	38041		0	2	2	2	2	2	2	0	2	0	0	2	2	2	2	2	2	2	0	2	2	0	2	2	0	0	2	2	0	2	2	2	2	2	0	2	0	2	2	2	2	2	0	2	0	0
chr13:42150827-42153247	fixed_Ppa-Ptre-Ptrs-Ptrt-Ptrv	2420		0	2	2	3	2	2	2	0	2	0	0	2	2	2	2	2	2	2	0	2	2	0	2	2	0	0	2	2	0	2	2	2	2	2	0	2	0	2	2	2	2	2	0	2	0	0
chr13:42498809-42508241	fixed_Ppa-Ptre-Ptrs-Ptrt-Ptrv	9432	DNAJC15	0	2	2	2	2	2	2	0	2	0	0	2	2	2	2	2	2	1	0	2	2	0	2	2	0	0	2	2	0	2	2	2	2	2	0	2	0	2	2	2	2	2	0	3	0	0
chr13:44829418-44839531	fixed_Gbeg-Ggod-Ggog	10113	TPT1-AS1	2	2	0	0	2	2	0	2	0	2	2	0	0	2	0	0	0	2	2	0	0	2	0	2	2	2	0	2	2	2	0	2	0	0	2	0	2	0	0	0	0	0	2	2	2	2
chr13:46083536-46086750	fixed_Gbeg-Ggod-Ggog	3214	LRCH1	2	2	0	0	2	2	0	2	0	2	1	0	0	2	0	0	0	2	2	0	0	2	0	2	2	2	0	2	2	1	0	2	0	0	2	0	2	0	0	0	0	0	2	2	2	2
chr13:46442024-46443511	fixed_Ppa-Ptre-Ptrs-Ptrt-Ptrv	1487		0	1	1	1	1	1	1	0	1	0	0	1	1	2	1	1	1	1	0	1	1	0	1	2	0	0	1	2	0	1	1	1	1	1	0	1	0	1	1	1	2	1	0	2	0	0
chr13:47914667-47915573	fixed_Pab-Ppy	906	RB1,LPAR6	2	0	1	2	0	0	2	2	2	1	1	2	1	2	1	1	1	0	1	2	1	2	2	0	1	2	2	0	2	0	2	0	2	2	2	2	2	2	1	1	2	2	1	2	1	1
chr13:50354419-50361427	fixed_Pab-Ppy	7008	RNASEH2B-AS1	2	0	1	2	0	0	2	2	2	2	1	2	1	2	2	1	1	0	2	2	1	2	1	0	2	2	2	0	1	0	1	0	1	2	2	1	1	2	2	2	1	1	2	2	2	2
chr13:50605809-50619119	fixed_Pab-Ppy	13310		2	0	2	2	0	0	2	2	2	2	2	2	2	2	2	2	2	0	2	2	2	2	2	0	2	2	2	0	2	0	2	0	2	2	2	2	2	2	2	2	2	2	2	3	2	2
chr13:50724569-50729493	fixed_Pab-Ppy	4924	FAM124A	2	0	2	2	0	0	2	2	2	2	2	2	2	2	2	2	2	0	2	2	2	2	2	0	2	2	2	0	2	0	2	0	2	2	2	2	2	2	2	2	2	2	2	2	2	2
chr13:53209252-53212570	fixed_Gbeg-Ggod-Ggog	3318		2	2	0	0	2	2	0	2	0	2	2	0	0	2	0	0	0	2	2	0	0	2	0	2	2	2	0	2	2	2	0	2	0	0	2	0	2	0	0	0	0	0	2	2	2	2
chr13:54851002-54851712	fixed_Pab-Ppy	710		2	0	3	2	0	0	2	2	2	2	1	2	1	2	2	1	1	0	2	2	2	2	2	0	1	2	2	0	3	0	3	0	2	1	2	2	2	2	2	2	2	2	2	2	2	2
chr13:55248259-55276206	fixed_Hde	27947		2	2	2	2	2	2	2	2	2	2	1	2	2	2	2	1	2	2	2	2	2	2	2	2	2	2	2	2	2	2	2	2	2	2	2	2	1	2	2	2	2	2	2	2	2	2
chr13:55314018-55318776	fixed_Gbeg-Ggod-Ggog	4758		1	2	0	0	2	2	0	2	0	1	1	0	0	2	0	0	0	1	2	0	0	1	0	1	1	1	0	1	1	1	0	1	0	0	2	0	1	0	0	0	0	0	1	2	2	2
chr13:55961218-55963082	fixed_Ppa-Ptre-Ptrs-Ptrt-Ptrv	1864		0	2	2	2	2	2	2	0	2	0	0	2	2	2	2	2	2	2	0	2	2	0	2	1	0	0	2	2	0	2	2	2	2	2	0	2	0	2	2	2	2	2	0	2	0	0
chr13:56173742-56174242	fixed_Pab-Ppy	500		2	0	2	2	0	0	3	2	2	2	2	2	2	2	2	2	2	0	2	2	2	3	2	0	2	2	2	0	3	0	2	0	2	2	2	2	2	2	2	3	2	2	2	2	2	2
chr13:56382318-56385175	fixed_Pab-Ppy	2857		2	0	2	2	0	0	2	2	2	2	2	2	2	2	2	2	2	0	2	2	2	2	2	0	2	2	2	0	2	0	2	0	2	2	2	2	2	2	2	2	2	2	2	2	2	2
chr13:56681002-56700834	fixed_Hde	19832		2	2	1	1	2	2	2	2	2	2	2	2	2	2	2	1	2	2	2	2	2	2	2	2	2	2	2	2	2	2	2	2	2	2	2	2	2	2	1	2	1	2	2	2	2	2
chr13:56873217-56878228	fixed_Gbeg-Ggod-Ggog	5011		2	2	0	0	2	2	0	2	0	2	2	0	0	2	0	0	0	2	2	0	0	2	0	2	1	2	0	2	2	2	0	2	0	0	2	0	1	0	0	0	0	0	2	2	2	2
chr13:56895238-56896833	fixed_Gbeg-Ggod-Ggog	1595		2	2	0	0	2	2	0	2	0	2	1	0	0	2	0	0	0	1	2	0	0	2	0	2	2	2	0	2	2	2	0	2	0	0	2	0	2	0	0	0	0	0	2	2	2	1
chr13:57686009-57694497	fixed_Pab-Ppy	8488		2	0	2	2	0	0	2	2	2	2	1	2	2	2	2	2	2	0	2	2	2	2	2	0	2	2	1	0	2	0	2	0	2	2	2	2	2	2	2	2	2	2	2	2	2	2
chr13:58393756-58398573	fixed_Pab-Ppy	4817		2	0	2	2	0	0	2	2	2	2	2	2	2	3	2	2	2	0	2	2	2	2	2	0	2	2	2	0	2	0	3	0	2	2	2	2	2	2	2	2	2	1	2	2	2	2
chr13:59556977-59561180	fixed_Pab-Ppy	4203	DIAPH3	2	0	2	2	0	0	2	2	2	2	2	2	2	2	2	2	2	0	2	2	2	2	2	0	2	2	2	0	2	0	2	0	2	2	2	2	2	2	2	2	2	2	2	2	2	2
chr13:60619932-60620637	fixed_Ppa-Ptre-Ptrs-Ptrt-Ptrv	705		0	2	2	2	2	2	2	0	2	0	0	2	2	2	3	2	2	2	0	3	2	0	2	2	0	0	2	2	0	2	2	2	2	2	0	3	0	2	2	2	2	2	0	2	0	0
chr13:60990823-61000566	fixed_Ggod	9743		2	2	2	1	2	2	2	2	2	2	2	2	2	2	2	1	1	2	2	2	2	2	2	2	1	2	0	2	2	2	0	2	2	2	2	2	1	2	2	1	2	1	2	2	2	2
chr13:61282475-61306937	fixed_Gbeg-Ggod-Ggog	24462	MIR548AN	2	2	0	0	2	2	0	2	0	2	2	0	0	2	0	0	0	2	2	0	0	2	0	2	2	2	0	2	2	2	0	2	0	0	2	0	2	0	0	0	0	0	2	2	2	2
chr13:61615340-61630532	fixed_Ppa-Ptre-Ptrs-Ptrt-Ptrv	15192		0	2	1	1	2	2	2	0	1	0	0	2	1	2	1	1	1	2	0	1	1	0	2	2	0	0	1	2	0	2	2	2	1	1	0	2	0	1	2	1	1	1	0	2	0	0
chr13:61945223-61955064	fixed_Gbeg-Ggod-Ggog	9841		2	2	0	0	2	2	0	2	0	2	2	0	0	2	0	0	0	2	2	0	0	2	0	2	2	2	0	2	2	2	0	2	0	0	2	0	2	0	0	0	0	0	2	3	2	2
chr13:62268326-62270544	fixed_Ppa-Ptre-Ptrs-Ptrt-Ptrv	2218		0	2	2	2	2	2	2	0	2	0	0	2	2	2	2	2	1	1	0	2	2	0	2	2	0	0	1	2	0	2	2	2	2	1	0	2	0	2	2	2	2	2	0	2	0	0
chr13:62601909-62602409	fixed_Pab-Ppy	500		2	0	1	2	0	0	2	2	2	2	2	2	2	2	2	2	2	0	2	2	2	2	2	0	2	2	1	0	2	0	2	0	2	2	2	2	3	2	2	1	2	1	2	2	2	1
chr13:62698761-62704203	fixed_Pab-Ppy	5442		2	0	1	2	0	0	2	2	2	2	2	2	2	2	2	2	2	0	2	2	2	2	2	0	2	2	2	0	2	0	2	0	2	2	2	2	2	2	2	2	2	2	2	2	2	2
chr13:62744544-62754326	fixed_Gbeg-Ggod-Ggog	9782		2	2	0	0	2	2	0	2	0	2	1	0	0	2	0	0	0	2	2	0	0	2	0	2	2	2	0	2	2	2	0	2	0	0	2	0	1	0	0	0	0	0	2	2	2	2
chr13:62831639-62842020	fixed_Ppa-Ptre-Ptrs-Ptrt-Ptrv	10381		0	2	2	2	2	2	2	0	2	0	0	2	2	2	2	1	1	2	0	2	2	0	2	2	0	0	1	2	0	2	2	2	2	2	0	2	0	2	2	2	2	2	0	2	0	0
chr13:63389677-63392518	fixed_Ppa-Ptre-Ptrs-Ptrt-Ptrv	2841		0	2	2	2	2	2	2	0	2	0	0	2	2	2	2	2	1	2	0	2	2	0	2	2	0	0	2	2	0	2	2	2	2	2	0	2	0	2	2	2	2	2	0	2	0	0
chr13:63562231-63570513	fixed_Ptre-Ptrs-Ptrt-Ptrv	8282		0	2	3	4	2	2	4	2	4	0	0	4	4	2	4	3	3	2	2	4	4	0	2	2	0	0	3	2	0	2	4	2	4	4	2	4	0	4	4	3	4	3	2	2	2	2
chr13:63691888-63697174	fixed_Gbeg-Ggod-Ggog	5286		2	2	0	0	2	2	0	2	0	1	1	0	0	1	0	0	0	1	2	0	0	2	0	2	2	1	0	2	1	2	0	1	0	0	1	0	1	0	0	0	0	0	2	1	1	2
chr13:64792229-64800478	fixed_Hde	8249		2	2	2	2	2	2	2	2	2	2	2	2	2	2	2	1	2	2	2	2	2	2	2	1	2	2	2	2	2	2	2	2	2	2	2	2	2	2	2	2	2	2	2	2	2	2
chr13:65089356-65091494	fixed_Pab-Ppy	2138		2	0	2	2	0	0	2	2	2	2	2	2	2	2	2	1	2	0	2	2	2	2	2	0	1	2	2	0	2	0	2	0	2	2	2	2	1	2	2	2	2	2	2	2	2	2
chr13:65120561-65121459	fixed_Gbeg-Ggod-Ggog	898		2	2	0	0	1	1	0	2	0	2	2	0	0	2	0	0	0	1	2	0	0	1	0	1	2	2	0	2	1	2	0	1	0	0	2	0	1	0	0	0	0	0	1	2	2	2
chr13:65502443-65507831	fixed_Gbeg-Ggod-Ggog	5388		2	2	0	0	2	2	0	2	0	2	2	0	0	2	0	0	0	2	2	0	0	2	0	2	2	2	0	2	1	2	0	2	0	0	2	0	2	0	0	0	0	0	2	2	2	2
chr13:66158656-66159770	fixed_Ggod	1114	PCDH9	2	2	2	2	2	2	2	2	1	2	2	1	2	2	2	2	2	1	2	1	2	1	2	1	2	2	2	1	2	2	0	2	2	2	2	0	2	1	2	2	1	2	2	2	2	2
chr13:66282758-66286061	fixed_Ppa-Ptre-Ptrs-Ptrt-Ptrv	3303	PCDH9	0	2	2	2	2	2	2	0	2	0	0	2	1	2	2	3	2	2	0	2	2	0	2	2	0	0	2	2	0	2	2	2	2	2	0	2	0	2	2	2	2	2	0	2	0	0
chr13:66955544-66956253	fixed_Pab-Ppy	709		2	0	1	2	0	0	2	2	2	2	1	2	2	3	2	1	1	0	2	1	2	2	2	0	1	3	1	0	2	0	2	0	2	2	2	2	1	2	2	2	2	2	1	2	2	1
chr13:67430302-67433438	fixed_Pab-Ppy	3136		2	0	2	2	0	0	2	2	2	2	2	2	2	2	2	2	2	0	2	2	2	2	2	0	2	2	2	0	1	0	2	0	2	2	2	2	1	2	2	2	2	2	2	2	2	2
chr13:67960527-67966366	fixed_Gbeg-Ggod-Ggog	5839		2	2	0	0	2	2	0	2	0	2	1	0	0	2	0	0	0	2	2	0	0	2	0	2	1	2	0	2	2	2	0	2	0	0	2	0	1	0	0	0	0	0	1	2	2	2
chr13:67992508-67994445	fixed_Gbeg-Ggod-Ggog	1937		2	2	0	0	2	2	0	2	0	2	1	0	0	2	0	0	0	2	2	0	0	2	0	2	1	2	0	2	2	2	0	2	0	0	2	0	1	0	0	0	0	0	2	2	2	2
chr13:68403627-68431104	fixed_Ppa-Ptre-Ptrs-Ptrt-Ptrv	27477	MIR548H4	0	2	2	2	2	2	2	0	2	0	0	2	2	2	2	1	2	2	0	2	2	0	2	2	0	0	2	2	0	2	2	2	2	2	0	2	0	2	2	2	2	2	0	2	0	0
chr13:68628530-68650982	fixed_Pab-Ppy	22452		2	0	2	2	0	0	2	2	2	2	2	2	2	2	2	1	2	0	2	2	2	2	2	0	1	2	1	0	2	0	2	0	2	2	2	2	1	2	2	2	2	2	2	2	2	2
chr13:69013819-69020747	fixed_Gbeg-Ggod-Ggog	6928		2	2	0	0	2	2	0	2	0	2	2	0	0	2	0	0	0	2	2	0	0	2	0	2	2	2	0	2	2	2	0	2	0	0	2	0	2	0	0	0	0	0	2	2	2	2
chr13:69078597-69079187	fixed_Pab-Ppy	590		2	0	2	2	0	0	3	2	3	2	2	2	2	2	2	2	2	0	2	2	2	2	2	0	2	3	2	0	2	0	2	0	2	2	2	3	2	2	2	2	2	2	2	3	2	2
chr13:69570022-69574703	fixed_Pab-Ppy	4681	KLHL1	2	0	2	2	0	0	2	2	1	2	1	2	1	2	2	1	2	0	2	2	2	2	2	0	2	2	2	0	2	0	2	0	2	2	2	2	2	2	2	2	2	2	2	2	2	2
chr13:69628771-69633424	fixed_Gbeg-Ggod-Ggog	4653		2	2	0	0	2	2	0	2	0	2	2	0	0	2	0	0	0	2	2	0	0	2	0	2	2	2	0	2	2	2	0	2	0	0	2	0	2	0	0	0	0	0	2	2	2	2
chr13:69964165-69969279	fixed_Pab-Ppy	5114		2	0	2	2	0	0	2	2	2	2	2	2	2	2	2	2	2	0	2	2	2	2	2	0	2	2	2	0	2	0	2	0	2	2	2	2	2	2	2	2	2	2	2	2	2	2
chr13:70085131-70088010	fixed_Gbeg-Ggod-Ggog	2879		2	2	0	0	2	2	0	2	0	2	2	0	0	2	0	0	0	2	2	0	0	2	0	1	2	2	0	1	2	2	0	2	0	0	2	0	2	0	0	0	0	0	2	3	2	2
chr13:74736597-74738786	fixed_Pab-Ppy	2189		2	0	2	2	0	0	3	2	2	1	1	2	1	3	2	1	1	0	2	2	2	1	2	0	1	2	1	0	2	0	3	0	2	2	2	2	1	2	2	1	2	2	1	3	2	2
chr13:75104320-75109659	fixed_Ppa	5339	LMO7	2	1	2	2	2	1	2	0	2	2	2	2	2	2	2	2	2	2	0	2	2	2	2	2	2	2	2	2	2	1	2	1	2	2	0	2	2	2	2	2	2	2	0	2	0	0
chr13:78200132-78201716	fixed_Gbeg	1584		2	1	1	2	1	1	2	2	1	1	1	2	1	2	1	1	2	1	2	1	2	2	0	1	1	2	2	1	2	2	2	1	2	2	2	2	2	2	2	1	1	1	2	2	2	1
chr13:80586704-80594658	fixed_Gbeg	7954		2	2	1	2	2	2	2	2	2	2	2	2	2	2	2	2	2	2	2	2	2	2	0	2	2	2	2	2	2	2	2	2	2	2	2	2	2	2	2	2	2	2	2	2	2	2
chr13:80663863-80675330	fixed_Gbeg-Ggod-Ggog	11467		2	2	0	0	2	2	0	2	0	2	2	0	0	2	0	0	0	2	2	0	0	2	0	2	2	2	0	2	2	2	0	2	0	0	2	0	2	0	0	0	0	0	2	2	2	2
chr13:80687614-80689923	fixed_Gbeg-Ggod-Ggog	2309		2	1	0	0	1	2	0	2	0	1	1	0	0	2	0	0	0	1	2	0	0	2	0	1	1	2	0	1	3	2	0	1	0	0	2	0	2	0	0	0	0	0	1	2	2	2
chr13:80746023-80753497	Gbeg-Ggod-Ggog-Ppa-Ptre-Ptrs-Ptrt-Ptrv	7474		0	2	0	0	2	2	0	0	0	0	0	0	0	2	0	0	0	2	0	0	0	0	0	2	0	0	0	2	0	2	0	2	0	0	0	0	0	0	0	0	0	0	0	2	0	0
chr13:80764129-80774515	fixed_Ggod	10386		2	2	2	2	2	2	1	2	2	2	2	1	2	2	1	2	1	2	2	2	1	2	2	2	2	2	1	2	2	2	0	2	2	2	2	1	2	0	2	1	2	1	2	2	2	2
chr13:80949146-80951362	fixed_Pab-Ppy	2216		2	0	2	2	0	0	2	2	2	2	2	2	1	2	2	1	3	0	2	2	2	2	2	0	2	2	2	0	2	0	2	0	2	2	2	2	2	2	2	2	2	2	2	2	2	2
chr13:81138237-81142404	fixed_Ggod	4167		2	2	0	1	2	2	2	2	2	2	2	2	0	2	2	1	2	2	2	1	2	2	2	2	2	2	1	2	1	2	0	2	2	2	2	2	2	1	2	2	2	2	2	3	2	2
chr13:81420499-81421499	fixed_Pab-Ppy	1000		2	0	1	2	0	0	2	2	2	2	2	2	1	2	2	1	2	0	2	2	2	2	2	0	2	2	1	0	2	0	2	0	2	2	2	2	2	2	2	2	2	2	2	2	2	2
chr13:81752344-81755279	fixed_Pab-Ppy	2935		2	0	2	1	0	0	2	1	1	2	2	2	1	2	2	1	2	0	2	2	2	2	2	0	1	2	1	0	2	0	2	0	2	2	2	2	2	2	2	1	1	2	2	2	2	2
chr13:82164958-82172229	fixed_Ggod	7271		2	2	1	2	2	2	2	2	2	2	2	2	2	2	2	1	2	2	2	2	2	2	1	2	2	2	1	2	2	2	0	2	1	2	2	2	2	2	2	1	2	2	2	2	2	2
chr13:82717053-82724062	fixed_Ppa-Ptre-Ptrs-Ptrt-Ptrv	7009		0	2	2	2	2	2	2	0	2	0	0	2	1	2	2	1	2	2	0	2	1	0	2	2	0	0	1	2	0	2	2	2	2	2	0	2	0	2	2	2	2	2	0	2	0	0
chr13:82849278-82857070	fixed_Pab-Ppy	7792		2	0	1	2	0	0	2	1	1	2	1	1	1	2	1	1	1	0	1	1	1	2	1	0	2	2	1	0	1	0	1	0	1	1	1	2	1	1	2	2	2	2	2	2	1	1
chr13:84249013-84249615	fixed_Ppa	602		2	1	2	2	1	1	2	0	2	2	2	2	1	2	2	1	2	1	0	1	2	2	2	1	2	2	1	1	2	1	2	1	2	2	0	2	2	2	2	2	2	2	0	2	0	0
chr13:85998198-86000391	fixed_Pab-Ppy	2193		2	0	1	2	0	0	2	2	1	2	2	2	1	2	2	1	2	0	2	1	1	2	2	0	1	2	2	0	1	0	2	0	2	1	2	2	1	2	2	2	2	1	2	2	2	2
chr13:86277232-86282215	fixed_Gbeg-Ggod-Ggog	4983		2	1	0	0	1	2	0	2	0	2	1	0	0	2	0	0	0	1	2	0	0	2	0	1	1	2	0	1	2	2	0	1	0	0	2	0	2	0	0	0	0	0	2	2	2	2
chr13:86379380-86382204	fixed_Gbeg-Ggod-Ggog	2824		2	2	0	0	2	2	0	2	0	2	2	0	0	2	0	0	0	2	2	0	0	2	0	2	2	2	0	2	2	2	0	2	0	0	2	0	1	0	0	0	0	0	2	2	2	2
chr13:86975151-86980057	fixed_Pab-Ppy	4906	MIR4500HG	2	0	2	2	0	0	2	2	2	2	1	2	2	2	2	2	2	0	2	2	1	2	2	0	2	2	2	0	1	0	2	0	2	2	2	2	2	2	2	2	2	2	2	2	2	2
chr13:87251337-87255326	fixed_Pab-Ppy	3989		2	0	2	2	0	0	2	2	2	2	1	2	2	2	2	2	2	0	2	2	2	2	2	0	2	2	2	0	2	0	2	0	2	2	2	2	2	2	2	2	2	2	2	2	2	2
chr13:87365413-87367334	fixed_Pab-Ppy	1921		2	0	2	2	0	0	2	2	2	2	2	2	1	2	2	1	2	0	1	2	2	2	2	0	2	2	2	0	2	0	2	0	2	2	2	2	1	2	2	2	2	2	2	2	2	2
chr13:87415783-87421130	fixed_Pab-Ppy	5347		2	0	2	2	0	0	2	2	1	2	1	2	1	2	2	1	1	0	2	2	2	1	2	0	1	2	2	0	2	0	2	0	1	2	2	2	2	2	2	2	1	1	2	2	2	2
chr13:88621729-88628391	fixed_Gbeg-Ggod-Ggog	6662		2	2	0	0	2	2	0	2	0	2	1	0	0	2	0	0	0	2	2	0	0	2	0	2	2	2	0	2	2	2	0	2	0	0	2	0	1	0	0	0	0	0	2	2	2	2
chr13:89285010-89295059	fixed_Ppa-Ptre-Ptrs-Ptrt-Ptrv	10049		0	2	2	2	2	2	2	0	2	0	0	2	1	2	2	1	1	2	0	2	2	0	2	2	0	0	1	2	0	2	2	2	2	2	0	2	0	2	2	1	2	1	0	2	0	0
chr13:90557699-90559158	fixed_Pab-Ppy	1459		1	0	1	1	0	0	2	2	1	1	1	1	1	1	1	1	1	0	2	2	2	1	1	0	1	1	1	0	2	0	2	0	1	1	2	1	1	1	1	1	1	1	2	2	2	1
chr13:91602487-91619780	fixed_Ppa-Ptre-Ptrs-Ptrt-Ptrv	17293	GPC5	0	2	2	2	1	2	2	0	2	0	0	2	2	2	2	2	2	2	0	2	2	0	2	2	0	0	2	2	0	2	2	2	2	2	0	2	0	2	2	2	2	2	0	2	0	0
chr13:91690419-91693306	fixed_Pab-Ppy	2887	GPC5	2	0	2	2	0	0	2	2	2	2	1	2	2	2	2	1	1	0	2	2	2	2	2	0	2	2	2	0	2	0	2	0	2	2	2	2	2	2	2	1	2	2	2	2	2	2
chr13:92259178-92263653	fixed_Pab-Ppy	4475	GPC5	2	0	2	2	0	0	2	2	2	2	1	2	2	2	2	1	2	0	2	2	2	2	2	0	1	2	2	0	3	0	2	0	2	2	2	2	2	2	2	1	2	2	2	2	2	2
chr13:92696088-92696680	fixed_Pab-Ppy	592	GPC6	2	0	2	2	0	0	2	2	2	1	1	2	2	2	2	2	2	0	2	2	1	2	2	0	1	2	2	0	2	0	2	0	2	1	2	2	2	2	2	2	2	2	2	1	2	2
chr13:93958348-93960152	fixed_Pab-Ppy	1804		2	0	1	1	0	0	1	2	1	2	2	1	1	2	1	1	1	0	2	2	1	2	1	0	2	1	2	0	2	0	1	0	1	1	2	1	2	1	1	1	1	1	2	2	1	1
chr13:94011371-94017464	fixed_Ppa-Ptre-Ptrs-Ptrt-Ptrv	6093		0	2	2	2	2	2	2	0	2	0	0	2	2	2	2	2	2	2	0	2	2	0	2	2	0	0	2	2	0	2	2	2	2	2	0	2	0	2	2	2	2	2	0	3	0	0
chr13:99051705-99053689	fixed_Pab-Ppy	1984		2	0	2	2	0	0	2	2	2	2	2	2	2	2	2	2	2	0	2	2	2	2	2	0	2	2	2	0	2	0	2	0	2	2	2	1	2	2	2	2	2	2	2	3	2	2
chr13:100680652-100687613	fixed_Ppa	6961	NALCN	2	2	2	2	2	2	2	0	2	2	1	2	2	2	2	1	2	2	0	2	2	2	2	2	1	2	2	2	2	2	2	2	2	2	0	2	2	2	2	2	2	2	0	2	0	0
chr13:101593484-101595226	fixed_Pab-Ppy	1742	FGF14	2	0	1	2	0	0	2	2	2	1	1	2	2	2	2	2	2	0	2	2	1	2	1	0	2	2	2	0	2	0	2	0	2	2	2	2	2	2	2	2	2	2	2	3	2	2
chr13:101870870-101883480	fixed_Pab-Ppy	12610		3	0	1	2	0	0	2	2	2	2	1	2	2	2	2	2	2	0	2	2	2	2	2	0	2	2	2	0	2	0	2	0	2	2	2	2	2	2	2	2	2	2	2	2	2	2
chr13:101916109-101924618	fixed_Pab-Ppy	8509		2	0	2	2	0	0	2	2	2	2	1	2	2	2	2	2	2	0	2	2	2	2	2	0	2	2	2	0	2	0	2	0	2	2	2	2	2	2	2	2	2	2	2	3	2	2
chr13:102938892-102949475	fixed_Pab-Ppy	10583		2	0	2	2	0	0	2	2	2	2	2	2	2	2	2	2	2	0	2	2	2	2	2	0	2	2	2	0	2	0	2	0	2	2	2	2	2	2	2	2	2	2	2	2	2	2
chr13:103377754-103379070	fixed_Ppa-Ptre-Ptrs-Ptrt-Ptrv	1316		0	2	2	2	1	1	2	0	2	0	0	2	1	2	2	2	2	2	0	2	1	0	2	2	0	0	2	1	0	2	2	2	2	2	0	2	0	2	2	2	2	2	0	2	0	0
chr13:103395365-103396921	fixed_Hde	1556		2	2	2	2	2	2	2	2	2	3	2	2	2	2	2	1	2	1	2	2	2	2	2	1	1	2	1	2	2	1	2	2	2	2	2	2	1	2	2	2	2	2	2	2	2	2
chr13:104810698-104811887	fixed_Ppa-Ptre-Ptrs-Ptrt-Ptrv	1189		0	2	1	2	2	2	2	0	2	0	0	2	2	2	2	2	2	2	0	2	2	0	2	2	0	0	2	2	0	2	2	2	2	2	0	2	0	2	2	2	1	1	0	2	0	0
chr13:105158279-105170707	fixed_Gbeg	12428	LINC00343	2	2	1	2	2	2	2	2	2	2	2	2	2	2	2	2	2	2	2	2	2	2	0	2	2	2	2	2	2	2	2	2	2	2	2	2	2	2	2	2	2	2	2	2	2	2
chr13:107546701-107549122	fixed_Pab-Ppy	2421		2	0	2	3	0	0	2	2	2	2	2	2	2	2	2	2	2	0	2	2	2	2	2	0	2	2	2	0	2	0	3	0	2	2	2	2	2	2	2	2	2	2	2	2	2	2
chr13:108663618-108677171	fixed_Gbeg-Ggod-Ggog	13553		2	2	0	0	2	2	0	2	0	2	2	0	0	2	0	0	0	2	2	0	0	2	0	2	2	2	0	2	2	2	0	2	0	0	2	0	2	0	0	0	0	0	2	2	2	2
chr13:109990304-109991719	fixed_Pab-Ppy	1415	RAB20	1	0	2	2	0	0	2	2	2	2	2	2	2	2	2	1	1	0	2	1	2	2	2	0	2	1	2	0	2	0	1	0	2	2	2	2	2	2	2	2	2	2	2	2	2	2
chr13:111707645-111713253	fixed_Ppa-Ptre-Ptrs-Ptrt-Ptrv	5608		0	2	2	2	2	2	2	0	2	0	0	2	2	2	2	2	2	2	0	2	2	0	2	2	0	0	2	2	0	2	2	2	2	2	0	2	0	2	2	2	2	2	0	2	0	0
chr13:111925375-111940108	fixed_Gbeg-Ggod-Ggog	14733		2	2	0	0	2	2	0	2	0	2	2	0	0	2	0	0	0	2	2	0	0	2	0	2	2	2	0	2	2	2	0	2	0	0	2	0	2	0	0	0	0	0	2	2	2	2
chr13:111957976-111959283	fixed_Pab-Ppy	1307		2	0	2	1	0	0	3	2	2	2	2	2	2	2	2	2	2	0	2	2	2	2	2	0	2	2	2	0	2	0	2	0	2	2	2	2	2	2	2	2	2	2	2	2	2	2
chr13:113252732-113256519	fixed_Ppa-Ptre-Ptrs-Ptrt-Ptrv	3787		0	2	2	2	2	2	2	0	2	0	0	2	2	2	2	2	2	2	0	2	2	0	2	2	0	0	2	2	0	2	2	2	2	2	0	2	0	2	2	2	2	2	0	2	0	0
chr13:113263402-113265041	fixed_Pab-Ppy	1639		2	0	2	1	0	0	2	2	2	3	2	2	2	2	2	2	2	0	2	1	2	2	2	0	3	3	2	0	2	0	1	0	2	2	2	1	2	2	2	2	2	2	2	3	2	2
chr13:113964198-113978429	fixed_Ppa	14231		3	2	2	1	2	2	2	0	2	2	2	2	2	2	2	3	2	2	0	2	2	2	2	2	2	2	2	2	2	2	2	2	2	2	0	2	2	2	2	2	2	2	0	2	0	0
chr14:19286397-19327842	fixed_Ppa-Ptre-Ptrs-Ptrt-Ptrv	41445	OR4M1	0	4	3	3	4	4	3	0	3	0	0	3	3	7	3	3	3	8	0	3	3	0	3	5	0	0	3	5	0	5	3	4	3	4	0	4	0	4	3	3	3	3	0	6	0	0
chr14:19565648-19570749	fixed_Gbeg-Ggod-Ggog	5101		2	2	0	0	2	2	0	2	0	2	1	0	0	2	0	0	0	2	2	0	0	2	0	1	2	2	0	2	2	2	0	2	0	0	2	0	2	0	0	0	0	0	2	2	2	2
chr14:19600706-19609186	fixed_Pab-Ppy	8480		2	0	2	2	0	0	2	2	2	2	2	2	2	2	2	2	2	0	2	2	2	2	2	0	2	2	2	0	2	0	2	0	2	2	2	2	2	2	2	2	2	2	2	2	2	2
chr14:19691904-19706426	Gbeg-Ggod-Ggog-Ppa-Ptre-Ptrs-Ptrt-Ptrv	14522		0	2	0	0	2	2	0	0	0	0	0	0	0	2	0	0	0	2	0	0	0	0	0	2	0	0	0	2	0	2	0	2	0	0	0	0	0	0	0	0	0	0	0	3	0	0
chr14:20474317-20477230	fixed_Ppa-Ptre-Ptrs-Ptrt-Ptrv	2913		0	2	3	2	2	2	2	0	2	0	0	2	2	2	2	2	2	2	0	2	2	0	2	2	0	0	2	2	0	2	2	2	2	2	0	2	0	2	2	2	2	2	0	2	0	0
chr14:20704058-20722421	fixed_Pab-Ppy	18363		2	0	2	2	0	0	2	2	2	2	1	2	2	2	2	2	2	0	2	2	2	2	2	0	2	2	2	0	2	0	2	0	2	2	2	3	1	2	2	2	2	2	2	2	2	2
chr14:23242190-23272576	fixed_Ppa-Ptre-Ptrs-Ptrt-Ptrv	30386		0	2	2	2	2	2	2	0	2	0	0	2	2	2	2	2	2	2	0	2	2	0	2	2	0	0	2	2	0	2	2	2	2	2	0	2	0	2	2	2	2	2	0	2	0	0
chr14:24487361-24492923	fixed_Pab-Ppy	5562	STXBP6	2	0	2	2	0	0	2	2	2	2	2	2	2	2	2	2	2	0	2	2	1	2	2	0	2	2	2	0	1	0	2	0	2	2	2	2	2	2	2	2	2	2	2	2	2	2
chr14:26832730-26842842	fixed_Ppa-Ptre-Ptrs-Ptrt-Ptrv	10112		0	2	2	2	1	2	2	0	2	0	0	2	2	2	2	2	2	2	0	2	2	0	2	1	0	0	2	2	0	2	2	2	2	2	0	2	0	2	2	2	2	2	0	2	0	0
chr14:28142679-28143734	fixed_Pab-Ppy	1055		2	0	2	2	0	0	2	2	2	2	1	2	2	2	2	2	2	0	2	2	2	2	2	0	2	2	2	0	2	0	1	0	2	2	2	2	2	2	2	2	1	2	3	2	2	2
chr14:29090137-29093485	fixed_Gbeg-Ggod-Ggog	3348		2	2	0	0	2	2	0	2	0	2	1	0	0	2	0	0	0	2	2	0	0	2	0	2	2	2	0	2	2	2	0	2	0	0	2	0	2	0	0	0	0	0	2	2	2	2
chr14:31983858-31985713	fixed_Ggod	1855	AKAP6	2	2	2	2	2	2	2	2	2	2	2	2	2	2	2	2	2	2	2	2	2	2	2	2	1	2	1	2	2	2	0	2	2	2	2	2	1	2	2	2	2	2	1	3	2	2
chr14:33821397-33832198	fixed_Ppa-Ptre-Ptrs-Ptrt-Ptrv	10801		0	2	2	2	1	2	2	0	1	0	0	2	2	2	2	2	2	2	0	2	2	0	2	2	0	0	2	2	0	2	2	2	2	2	0	2	0	2	2	2	2	2	0	2	0	0
chr14:37584666-37586122	fixed_Pab-Ppy	1456		2	0	2	2	0	0	2	2	2	2	2	2	2	2	2	2	2	0	2	2	2	2	2	0	2	2	2	0	2	0	2	0	2	2	2	2	2	2	2	2	2	2	2	2	2	2
chr14:38733902-38749811	fixed_Gbeg-Ggod-Ggog	15909		2	1	0	0	2	1	0	2	0	2	1	0	0	2	0	0	0	2	2	0	0	2	0	2	2	2	0	2	2	1	0	1	0	0	2	0	2	0	0	0	0	0	2	2	2	2
chr14:39074885-39093570	fixed_Gbeg-Ggod-Ggog	18685		2	2	0	0	1	2	0	2	0	2	2	0	0	2	0	0	0	2	2	0	0	2	0	2	2	2	0	2	2	2	0	2	0	0	2	0	2	0	0	0	0	0	2	2	2	2
chr14:39376813-39382092	fixed_Ppa-Ptre-Ptrs-Ptrt-Ptrv	5279		0	2	2	2	2	2	2	0	2	0	0	2	2	2	2	2	2	2	0	2	2	0	2	2	0	0	2	2	0	2	2	2	2	2	0	2	0	2	2	2	2	2	0	2	0	0
chr14:39613923-39618597	fixed_Pab-Ppy	4674		2	0	1	2	0	0	2	2	2	2	2	2	2	2	2	1	2	0	2	2	2	2	2	0	2	2	2	0	2	0	2	0	2	2	2	2	2	2	2	2	2	2	2	3	2	2
chr14:39893366-39921853	Gbeg-Ggod-Ggog-Ppa-Ptre-Ptrs-Ptrt-Ptrv	28487		0	2	0	0	2	2	0	0	0	0	0	0	0	2	0	0	0	2	0	0	0	0	0	2	0	0	0	2	0	2	0	2	0	0	0	0	0	0	0	0	0	0	0	2	0	0
chr14:39935397-39942119	fixed_Ppa-Ptre-Ptrs-Ptrt-Ptrv	6722		0	2	1	2	2	2	2	0	2	0	0	2	1	2	2	1	2	2	0	2	2	0	2	2	0	0	2	2	0	2	2	2	2	2	0	2	0	2	2	2	2	2	0	2	0	0
chr14:39997988-40011837	fixed_Gbeg-Ggod-Ggog	13849		2	2	0	0	1	2	0	2	0	2	2	0	0	2	0	0	0	1	2	0	0	2	0	2	2	2	0	2	2	2	0	2	0	0	2	0	1	0	0	0	0	0	2	2	2	2
chr14:40028312-40030895	fixed_Pab-Ppy	2583		2	0	2	2	0	0	2	2	2	2	2	2	2	2	2	2	2	0	2	2	2	2	2	0	2	2	2	0	2	0	2	0	2	2	2	2	2	2	2	3	2	2	2	3	2	2
chr14:40086802-40093617	fixed_Ppa-Ptre-Ptrs-Ptrt-Ptrv	6815		0	2	2	2	2	2	2	0	2	0	0	2	2	2	2	1	2	1	0	2	2	0	2	1	0	0	2	2	0	2	2	1	2	2	0	2	0	2	2	2	2	1	0	2	0	0
chr14:40093617-40095388	Ppa-Ptre-Ptrs-Ptrt-Ptrv-Pab-Ppy	1771		0	0	2	2	0	0	2	0	2	0	0	2	2	2	2	2	2	0	0	2	2	0	2	0	0	0	2	0	0	0	2	0	2	2	0	2	0	2	2	2	2	2	0	2	0	0
chr14:40095388-40100979	fixed_Ppa-Ptre-Ptrs-Ptrt-Ptrv	5591		0	2	1	2	2	2	2	0	2	0	0	2	2	2	2	1	2	1	0	2	2	0	2	2	0	0	2	2	0	2	2	2	2	2	0	2	0	2	2	2	2	2	0	2	0	0
chr14:40239339-40241400	fixed_Gbeg-Ggod-Ggog	2061		2	2	0	0	1	2	0	2	0	2	1	0	0	2	0	0	0	2	1	0	0	1	0	2	1	2	0	2	2	1	0	1	0	0	2	0	2	0	0	0	0	0	2	3	2	2
chr14:40243601-40274483	fixed_Pab-Ppy	30882		2	0	2	2	0	0	2	2	2	1	1	2	2	2	2	1	2	0	2	2	2	2	2	0	1	2	2	0	2	0	2	0	2	2	2	2	2	2	2	1	2	1	1	2	2	2
chr14:40370248-40371737	fixed_Gbeg-Ggod-Ggog	1489		2	2	0	0	2	2	0	2	0	2	2	0	0	2	0	0	0	2	2	0	0	1	0	2	1	2	0	2	2	2	0	2	0	0	2	0	1	0	0	0	0	0	1	2	2	2
chr14:40381550-40417869	fixed_Gbeg-Ggod-Ggog	36319		2	2	0	0	2	2	0	2	0	2	2	0	0	2	0	0	0	2	2	0	0	2	0	2	2	2	0	2	2	2	0	2	0	0	2	0	2	0	0	0	0	0	2	2	2	2
chr14:40601605-40717625	fixed_Ppa-Ptre-Ptrs-Ptrt-Ptrv	116020		0	2	2	2	2	2	2	0	2	0	0	2	2	2	2	2	2	2	0	2	2	0	2	2	0	0	2	2	0	2	2	2	2	2	0	2	0	2	2	2	2	2	0	2	0	0
chr14:40723449-40760957	fixed_Ppa-Ptre-Ptrs-Ptrt-Ptrv	37508		0	2	2	2	2	2	2	0	2	0	0	2	2	2	2	2	2	2	0	2	2	0	2	2	0	0	1	2	0	2	2	2	2	2	0	2	0	2	2	2	2	2	0	2	0	0
chr14:40779710-40784818	fixed_Ppa-Ptre-Ptrs-Ptrt-Ptrv	5108		0	2	2	2	2	2	2	0	2	0	0	2	2	2	2	1	2	2	0	2	2	0	2	2	0	0	1	2	0	2	2	2	2	2	0	2	0	2	2	2	2	2	0	2	0	0
chr14:40812513-40814757	fixed_Pab-Ppy	2244		2	0	1	2	0	0	2	2	2	2	2	2	2	2	2	1	1	0	2	2	2	2	2	0	1	2	2	0	1	0	2	0	2	2	2	2	2	2	2	2	2	2	2	2	2	2
chr14:40998023-40999397	fixed_Pab-Ppy	1374		2	0	2	2	0	0	2	2	2	2	1	2	2	2	2	2	2	0	2	2	2	2	2	0	2	2	2	0	2	0	2	0	2	2	1	2	2	2	2	2	2	2	2	2	2	2
chr14:41100166-41101504	fixed_Pab-Ppy	1338		2	0	2	2	0	0	2	2	2	2	1	2	2	2	2	1	2	0	2	3	2	2	2	0	1	2	2	0	2	0	2	0	2	2	2	2	2	2	2	2	2	2	2	2	2	2
chr14:41461349-41467886	fixed_Pab-Ppy	6537		2	0	1	2	0	0	2	2	2	2	2	2	2	2	2	1	2	0	2	2	2	2	2	0	2	2	2	0	2	0	2	0	2	2	2	3	2	2	2	2	2	2	2	3	2	2
chr14:41513658-41516567	fixed_Pab-Ppy	2909		2	0	2	2	0	0	2	2	2	2	1	2	2	2	2	2	1	0	2	2	2	2	2	0	2	2	2	0	2	0	2	0	2	2	2	2	2	2	2	2	2	2	2	2	2	2
chr14:42009053-42019220	fixed_Gbeg-Ggod-Ggog	10167		2	2	0	0	2	2	0	2	0	2	2	0	0	2	0	0	0	2	2	0	0	2	0	2	2	2	0	2	2	2	0	2	0	0	2	0	2	0	0	0	0	0	2	2	2	2
chr14:42395935-42399060	fixed_Gbeg-Ggod-Ggog	3125		2	2	0	0	1	2	0	2	0	2	2	0	0	2	0	0	0	2	2	0	0	2	0	2	2	2	0	1	1	2	0	2	0	0	2	0	2	0	0	0	0	0	2	2	2	2
chr14:42475302-42481496	fixed_Ppa-Ptre-Ptrs-Ptrt-Ptrv	6194		0	2	2	2	2	2	2	0	2	0	0	2	1	2	2	2	2	2	0	2	2	0	2	2	0	0	2	2	0	2	2	2	2	2	0	2	0	2	2	2	2	2	0	2	0	0
chr14:42498554-42500347	fixed_Pab-Ppy	1793		2	0	2	2	0	0	2	2	2	1	2	2	2	2	2	2	2	0	2	2	2	2	2	0	2	2	2	0	2	0	2	0	2	2	2	2	2	2	2	2	2	2	2	2	2	2
chr14:42800950-42825647	fixed_Gbeg-Ggod-Ggog	24697		2	2	0	0	2	2	0	2	0	2	1	0	0	2	0	0	0	2	2	0	0	2	0	1	2	2	0	2	2	2	0	2	0	0	2	0	2	0	0	0	0	0	2	2	2	2
chr14:42850503-42876010	fixed_Ppy	25507		2	2	2	2	0	2	2	2	2	2	2	2	2	2	2	1	2	0	2	2	2	2	2	0	2	2	2	0	2	0	2	2	2	2	2	2	2	2	2	2	2	2	2	2	2	2
chr14:43221228-43222381	fixed_Pab-Ppy	1153		2	0	2	2	0	0	2	2	2	1	1	2	2	2	2	1	1	0	2	1	1	2	2	0	2	2	2	0	2	0	2	0	2	2	2	2	2	2	2	2	2	1	2	2	2	2
chr14:43750800-43751300	fixed_Pab-Ppy	500		2	0	2	2	0	0	2	2	2	2	2	2	2	2	2	2	2	0	2	2	2	2	2	0	2	2	2	0	2	0	2	0	2	2	2	2	1	2	2	2	2	2	2	3	2	2
chr14:44003316-44015933	fixed_Pab-Ppy	12617		2	0	2	2	0	0	2	2	2	2	2	2	2	2	2	2	2	0	2	2	2	2	2	0	2	2	2	0	2	0	2	0	2	2	2	2	2	2	2	2	2	2	2	2	2	2
chr14:44255908-44258402	fixed_Gbeg-Ggod-Ggog	2494		2	2	0	0	2	2	0	2	0	2	1	0	0	2	0	0	0	2	2	0	0	2	0	2	1	2	0	2	2	2	0	2	0	0	2	0	2	0	0	0	0	0	2	2	2	2
chr14:44846151-45041566	fixed_Gbeg-Ggod-Ggog	195415		2	2	0	0	2	2	0	2	0	2	2	0	0	2	0	0	0	2	2	0	0	2	0	2	2	2	0	2	2	2	0	2	0	0	2	0	2	0	0	0	0	0	2	2	2	2
chr14:45043523-45351903	fixed_Gbeg-Ggod-Ggog	308380		2	2	0	0	2	2	0	2	0	2	2	0	0	2	0	0	0	2	2	0	0	2	0	2	2	2	0	2	2	2	0	2	0	0	2	0	2	0	0	0	0	0	2	2	2	2
chr14:46067611-46074881	fixed_Gbeg-Ggod-Ggog	7270		2	2	0	0	2	2	0	1	0	2	1	0	0	2	0	0	0	2	1	0	0	1	0	2	1	2	0	2	1	2	0	2	0	0	1	0	2	0	0	0	0	0	1	2	2	1
chr14:46398080-46400744	fixed_Pab-Ppy	2664	MDGA2	2	0	1	2	0	0	2	2	2	2	2	2	1	2	2	1	1	0	2	2	1	2	2	0	1	2	1	0	2	0	2	0	2	2	2	2	1	2	2	2	2	2	1	2	2	2
chr14:46499484-46503789	fixed_Pab-Ppy	4305	MDGA2	2	0	2	2	0	0	2	2	1	2	1	1	2	2	2	2	1	0	1	2	2	2	2	0	2	2	1	0	2	0	2	0	1	2	2	2	2	2	2	2	2	2	2	2	2	2
chr14:46699298-46702734	fixed_Ppa-Ptre-Ptrs-Ptrt-Ptrv	3436	MDGA2	0	1	2	2	2	2	2	0	2	0	0	2	2	2	2	2	2	1	0	2	2	0	2	2	0	0	2	2	0	1	2	2	2	2	0	2	0	2	2	2	2	2	0	2	0	0
chr14:46729351-46734366	fixed_Gbeg-Ggod-Ggog	5015	MDGA2	2	2	0	0	2	2	0	2	0	2	2	0	0	2	0	0	0	1	2	0	0	2	0	2	2	2	0	2	2	1	0	2	0	0	2	0	2	0	0	0	0	0	2	2	2	2
chr14:47581468-47610793	fixed_Ppa-Ptre-Ptrs-Ptrt-Ptrv	29325		0	2	2	2	2	2	2	0	2	0	0	2	2	2	2	2	2	2	0	2	2	0	2	2	0	0	2	2	0	2	2	2	2	2	0	2	0	2	2	2	2	2	0	2	0	0
chr14:48003952-48005612	fixed_Pab-Ppy	1660		2	0	2	2	0	0	2	2	2	2	2	2	2	2	2	1	2	0	2	2	2	2	2	0	2	2	2	0	2	0	2	0	2	2	2	2	1	2	2	2	2	2	3	2	2	2
chr14:48203507-48207520	fixed_Ptrs	4013		2	2	1	2	2	2	2	2	2	2	2	2	2	2	2	2	1	1	2	2	2	2	1	1	2	2	2	2	1	2	2	2	1	2	2	2	0	2	2	2	2	2	2	2	2	2
chr14:49000726-49001983	fixed_Gbeg-Ggod-Ggog	1257		2	2	0	0	2	2	0	2	0	2	2	0	0	2	0	0	0	2	2	0	0	2	0	2	2	2	0	2	2	2	0	2	0	0	2	0	2	0	0	0	0	0	2	2	2	2
chr14:52725645-52745986	fixed_Ptrv	20341		0	2	2	2	2	2	2	2	2	2	2	2	2	2	2	2	2	2	2	2	2	2	2	2	0	1	2	2	2	2	2	2	2	2	2	2	2	2	2	2	2	2	2	2	2	2
chr14:58424682-58440914	fixed_Pab-Ppy	16232		2	0	2	2	0	0	2	2	2	2	2	2	2	2	2	2	2	0	2	2	2	2	2	0	2	2	2	0	2	0	2	0	2	2	2	2	2	2	2	2	2	2	2	3	2	2
chr14:58738399-58740312	fixed_Pab-Ppy	1913	DAAM1	2	0	2	2	0	0	2	2	2	2	2	2	2	2	2	2	2	0	2	2	2	2	2	0	2	2	2	0	2	0	2	0	2	2	2	2	2	2	2	2	2	2	2	3	2	2
chr14:59310060-59313464	fixed_Pab-Ppy	3404	RTN1	2	0	2	2	0	0	2	2	2	2	2	2	2	2	2	2	2	0	2	2	2	2	2	0	2	2	2	0	2	0	2	0	2	2	3	2	2	2	2	2	2	2	2	2	2	2
chr14:59932436-59934242	fixed_Gbeg-Ggod-Ggog	1806		1	1	0	0	2	2	0	1	0	1	1	0	0	1	0	0	0	1	1	0	0	1	0	2	1	1	0	2	1	1	0	2	0	0	1	0	1	0	0	0	0	0	1	2	1	1
chr14:61939164-61939664	fixed_Gbeg-Ggod-Ggog	500		2	2	0	0	2	2	0	2	0	2	2	0	0	3	0	0	0	2	2	0	0	2	0	2	3	3	0	2	2	2	0	2	0	0	2	0	2	0	0	0	0	0	3	2	2	2
chr14:62280167-62281731	fixed_Ppa-Ptre-Ptrs-Ptrt-Ptrv	1564	KCNH5	0	2	2	2	2	2	2	0	2	0	0	2	2	2	2	2	2	2	0	2	2	0	2	2	0	0	2	2	0	2	2	2	2	2	0	3	0	2	2	2	2	2	0	2	0	0
chr14:62409851-62410553	fixed_Gbeg-Ggod-Ggog	702	KCNH5	2	2	0	0	2	2	0	2	0	2	2	0	0	2	0	0	0	1	2	0	0	2	0	2	1	2	0	2	2	2	0	2	0	0	2	0	2	0	0	0	0	0	2	2	2	2
chr14:64698702-64699784	fixed_Pab-Ppy	1082		2	0	2	1	0	0	1	2	1	2	2	2	2	2	2	1	2	0	2	1	2	2	2	0	2	2	2	0	2	0	1	0	1	2	2	2	2	2	1	1	1	1	2	2	2	2
chr14:65239711-65242400	fixed_Ppa-Ptre-Ptrs-Ptrt-Ptrv	2689	FUT8	0	2	2	2	2	2	2	0	2	0	0	2	2	2	2	2	2	2	0	2	2	0	2	2	0	0	2	2	0	2	2	2	2	2	0	2	0	2	2	2	2	2	0	2	0	0
chr14:66088598-66092899	fixed_Gbeg-Ggod-Ggog	4301	GPHN	2	2	0	0	2	2	0	2	0	2	2	0	0	2	0	0	0	2	2	0	0	2	0	2	1	2	0	2	2	2	0	2	0	0	2	0	2	0	0	0	0	0	2	2	2	2
chr14:67348875-67349598	fixed_Gbeg-Ggod-Ggog	723	ZFYVE26	3	2	0	0	2	2	0	2	0	2	2	0	0	2	0	0	0	2	2	0	0	2	0	2	2	2	0	2	2	2	0	2	0	0	2	0	2	0	0	0	0	0	2	3	2	2
chr14:69443572-69444958	fixed_Ppa-Ptre-Ptrs-Ptrt-Ptrv	1386	SMOC1	0	2	2	2	2	2	3	0	2	0	0	2	2	2	2	2	2	2	0	2	2	0	2	2	0	0	2	1	0	2	2	2	2	2	0	2	0	2	2	2	2	2	0	2	0	0
chr14:69503794-69505593	fixed_Pab-Ppy	1799	SMOC1	2	0	2	2	0	0	2	2	2	2	2	2	2	3	2	2	2	0	2	2	2	2	2	0	2	2	2	0	2	0	2	0	2	2	2	2	2	2	2	2	2	3	2	2	2	2
chr14:69753463-69754632	fixed_Gbeg-Ggod-Ggog	1169		2	2	0	0	1	2	0	2	0	2	2	0	0	3	0	0	0	1	2	0	0	2	0	2	2	2	0	1	2	2	0	2	0	0	2	0	2	0	0	0	0	0	2	3	2	2
chr14:70986818-70995717	fixed_Pab-Ppy	8899		2	0	2	2	0	0	2	2	2	2	2	2	2	2	2	2	1	0	2	2	2	2	2	0	2	2	2	0	2	0	2	0	2	2	2	2	2	2	2	2	2	2	2	2	2	2
chr14:71781163-71784488	fixed_Pab-Ppy	3325	RGS6	2	0	2	2	0	0	2	2	2	3	1	2	2	2	2	2	2	0	2	2	2	2	2	0	2	2	2	0	2	0	2	0	2	2	2	2	2	2	3	2	2	2	2	2	2	2
chr14:73611647-73614768	fixed_Pab-Ppy	3121	ALDH6A1	2	0	2	2	0	0	2	2	2	2	1	2	2	2	2	2	1	0	2	2	2	2	2	0	1	2	2	0	2	0	2	0	2	1	2	2	2	2	2	1	2	2	1	2	2	2
chr14:73808505-73821084	fixed_Ppa-Ptre-Ptrs-Ptrt-Ptrv	12579		0	2	2	2	2	3	2	0	2	0	0	2	2	2	2	2	2	2	0	2	2	0	2	2	0	0	2	2	0	2	2	2	2	3	0	2	0	2	2	2	2	2	0	2	0	0
chr14:77142027-77144303	fixed_Ptrt	2276	SPTLC2	2	2	2	2	2	2	2	2	2	2	1	2	2	3	2	2	2	2	2	2	2	2	2	2	2	2	2	2	0	2	2	2	2	3	2	2	1	2	2	2	2	2	2	2	2	2
chr14:77888940-77890856	fixed_Pab-Ppy	1916		2	0	2	2	0	0	2	2	2	2	2	2	2	3	2	2	2	0	2	2	2	2	2	0	2	2	2	0	1	0	2	0	2	2	2	2	2	2	2	2	2	2	2	2	2	2
chr14:78306169-78307655	fixed_Hde	1486	NRXN3	2	2	2	2	2	2	2	2	2	2	1	2	2	2	2	3	2	2	2	2	2	2	2	2	2	2	2	2	2	2	2	2	2	2	2	2	2	2	2	2	2	2	2	3	2	2
chr14:79981603-79985378	fixed_Hde	3775	LOC100628307	2	2	2	2	2	2	2	2	2	2	2	2	2	2	2	2	2	2	2	2	2	2	2	2	2	2	2	2	2	2	2	2	2	2	2	2	2	2	2	2	2	2	2	2	2	2
chr14:80224904-80231435	fixed_Pab-Ppy	6531	CEP128	2	0	2	2	0	0	2	2	2	2	2	2	2	2	2	2	2	0	2	2	2	2	2	0	2	2	2	0	2	0	2	0	2	2	2	2	2	2	2	2	2	2	2	3	2	2
chr14:81275284-81276478	fixed_Pab-Ppy	1194		2	0	2	2	0	0	2	2	2	2	2	2	2	2	2	2	2	0	2	2	2	2	2	0	2	2	2	0	2	0	2	0	2	2	2	2	2	2	2	2	2	2	2	2	2	2
chr14:82705265-82716611	fixed_Ppa-Ptre-Ptrs-Ptrt-Ptrv	11346		0	2	2	2	1	2	2	0	2	0	0	2	2	2	2	3	2	2	0	2	2	0	2	2	0	0	2	2	0	2	2	2	2	2	0	2	0	2	2	2	2	2	0	2	0	0
chr14:83517324-83530114	fixed_Ppa-Ptre-Ptrs-Ptrt-Ptrv	12790		0	2	2	2	2	2	2	0	2	0	0	2	2	2	2	1	2	2	0	2	2	0	2	2	0	0	2	2	0	2	2	2	2	2	0	2	0	2	2	2	2	2	0	2	0	0
chr14:83746808-83748486	fixed_Pab-Ppy	1678		2	0	2	1	0	0	2	2	2	2	1	2	2	2	2	3	2	0	2	2	2	2	2	0	2	2	2	0	2	0	2	0	2	2	2	2	2	2	2	2	2	2	2	2	2	2
chr14:85080173-85081837	fixed_Ppa	1664	FLRT2	2	2	2	2	2	2	2	0	2	2	2	2	2	2	2	2	2	2	0	2	2	2	2	2	2	2	2	2	2	2	2	2	2	2	0	2	2	2	2	2	2	2	0	2	0	0
chr14:87876121-87883412	fixed_Pab-Ppy	7291		1	0	2	2	0	0	2	2	2	2	2	2	2	2	2	2	1	0	2	2	2	2	2	0	2	2	2	0	2	0	2	0	2	2	2	2	2	2	2	1	2	2	2	2	2	2
chr14:92255939-92266280	fixed_Pab-Ppy	10341	LGMN	2	0	2	1	0	0	2	2	2	2	2	2	2	2	2	2	2	0	2	2	2	2	2	0	2	2	2	0	2	0	2	0	2	2	2	2	2	2	2	2	2	2	2	2	2	2
chr14:92510136-92513001	fixed_Pab-Ppy	2865	ITPK1	2	0	2	3	0	0	2	3	3	2	2	2	3	3	3	2	2	0	3	3	3	2	2	0	3	3	2	0	2	0	2	0	3	2	3	1	2	3	3	3	2	2	2	3	3	3
chr14:93902154-93906701	fixed_Ppa-Ptre-Ptrs-Ptrt-Ptrv	4547		0	2	1	2	2	2	2	0	3	0	0	2	1	3	3	2	1	2	0	1	2	0	3	2	0	0	2	3	0	2	1	3	2	2	0	1	0	3	3	2	2	2	0	3	0	0
chr14:97459009-97460007	fixed_Gbeg-Ggod-Ggog	998		2	2	0	0	3	2	0	2	0	2	2	0	0	3	0	0	0	2	2	0	0	2	0	3	3	2	0	2	2	3	0	2	0	0	3	0	2	0	0	0	0	0	2	3	3	2
chr14:99754080-99755628	fixed_Gbeg-Ggod-Ggog	1548		2	3	0	0	2	3	0	3	0	2	2	0	0	2	0	0	0	2	3	0	0	2	0	2	2	2	0	2	2	3	0	3	0	0	3	0	2	0	0	0	0	0	2	2	3	3
chr14:102848952-102850646	fixed_Pab-Ppy	1694		2	0	2	2	0	0	2	2	2	2	1	2	2	2	2	2	2	0	2	2	2	2	2	0	2	2	2	0	2	0	2	0	2	2	2	2	2	2	2	2	2	2	2	2	2	2
chr14:105549870-105552192	fixed_Ppa	2322		1	2	6	6	3	2	5	0	4	2	2	5	5	5	6	7	5	2	0	6	6	2	4	2	2	2	6	2	2	2	6	2	4	6	0	6	2	6	5	6	5	5	0	3	0	0
chr14:106291403-106307109	fixed_Ppa-Ptre-Ptrs-Ptrt-Ptrv	15706		0	5	2	2	5	6	2	0	2	0	0	2	2	2	2	2	2	5	0	3	2	0	2	5	0	0	2	5	0	5	2	7	2	2	0	2	0	2	2	2	2	2	0	3	0	0
chr15:18421429-18428229	fixed_Pab-Ppy	6800		4	0	9	9	0	0	9	2	10	4	4	5	9	6	9	11	8	0	2	10	9	4	11	0	4	4	9	0	4	0	11	0	10	10	2	9	4	11	11	7	9	7	2	8	3	2
chr15:19048266-19089547	Ppa-Ptre-Ptrs-Ptrt-Ptrv-Pab-Ppy	41281		0	0	4	4	0	0	4	0	4	0	0	4	4	7	4	4	5	0	0	4	4	0	2	0	0	0	4	0	0	0	4	0	4	4	0	4	0	5	3	5	4	4	0	3	0	0
chr15:19225132-19229336	fixed_Pab-Ppy	4204		5	0	12	15	0	0	14	5	12	4	4	13	13	15	13	13	15	0	5	14	12	4	11	0	4	5	14	0	5	0	14	0	12	14	4	14	4	14	11	13	13	12	5	8	5	5
chr15:19245999-19251662	fixed_Pab-Ppy	5663		4	0	15	15	0	0	12	4	13	4	3	15	15	13	13	14	17	0	4	13	13	4	10	0	4	4	14	0	5	0	16	0	15	15	4	15	4	15	11	15	15	13	5	7	4	4
chr15:19428778-19438802	fixed_Gbeg-Ggod-Ggog	10024	LOC348120	1	1	0	0	2	1	0	2	0	2	1	0	0	9	0	0	0	4	2	0	0	2	0	2	2	2	0	3	2	2	0	1	0	0	2	0	2	0	0	0	0	0	2	3	2	2
chr15:19438802-19439406	Gbeg-Ggod-Ggog-Pab-Ppy	604	LOC348120	1	0	0	0	0	0	0	1	0	2	2	0	0	9	0	0	0	0	2	0	0	2	0	0	1	1	0	0	1	0	0	0	0	0	1	0	2	0	0	0	0	0	2	3	1	2
chr15:19455144-19466893	fixed_Pab-Ppy	11749	LOC348120	2	0	4	4	0	0	4	2	4	2	2	4	4	10	4	4	5	0	2	4	4	2	2	0	2	2	4	0	2	0	4	0	4	4	2	5	2	5	3	5	4	4	2	3	2	2
chr15:19763612-19768875	fixed_Gbeg-Ggod-Ggog	5263		2	1	0	0	2	2	0	2	0	2	2	0	0	9	0	0	0	4	2	0	0	1	0	3	2	2	0	3	2	2	0	2	0	0	2	0	1	0	0	0	0	0	2	3	2	2
chr15:19768875-19772042	Gbeg-Ggod-Ggog-Pab-Ppy	3167		2	0	0	0	0	0	0	2	0	2	1	0	0	10	0	0	0	0	2	0	0	2	0	0	2	2	0	0	2	0	0	0	0	0	2	0	2	0	0	0	0	0	2	3	2	2
chr15:19783844-19795338	fixed_Pab-Ppy	11494	LOC727924	2	0	3	4	0	0	4	2	4	2	2	4	4	10	4	4	5	0	2	4	4	2	2	0	2	2	4	0	2	0	4	0	4	4	2	5	2	5	3	5	4	4	2	3	2	2
chr15:19833451-19883982	fixed_Ppa-Ptre-Ptrs-Ptrt-Ptrv	50531	LOC727924,OR4M2,OR4N4	0	3	3	3	4	3	3	0	3	0	0	3	3	7	3	3	4	6	0	3	3	0	3	4	0	0	3	5	0	5	3	3	3	4	0	3	0	4	3	4	3	3	0	5	0	0
chr15:19927504-19935572	fixed_Ppa-Ptre-Ptrs-Ptrt-Ptrv	8068		0	1	2	2	2	1	2	0	2	0	0	2	2	6	2	2	2	1	0	2	2	0	2	1	0	0	2	2	0	1	3	1	2	2	0	2	0	3	2	3	2	2	0	2	0	0
chr15:19976006-19982357	fixed_Ppa	6351		1	2	7	5	3	2	5	0	4	2	1	5	5	6	7	7	6	2	0	6	6	2	4	2	2	2	6	2	2	2	6	2	4	6	0	6	2	6	5	7	6	5	0	2	0	0
chr15:21003683-21048587	Ppa-Ptre-Ptrs-Ptrt-Ptrv-Pab-Ppy	44904		0	0	4	4	0	0	4	0	4	0	0	4	4	7	4	4	5	0	0	4	4	0	2	0	0	0	4	0	0	0	4	0	4	4	0	4	0	5	3	5	4	4	0	3	0	0
chr15:21435904-21436404	fixed_Ppa	500		2	2	2	2	2	2	2	0	2	2	2	2	2	2	2	2	2	2	0	2	2	2	2	1	2	2	2	1	2	2	2	2	2	2	0	2	2	2	2	2	2	1	0	2	0	0
chr15:22374323-22468484	fixed_Ggod-Ggog	94161	PWRN1	2	2	0	0	2	2	0	2	0	2	2	0	0	2	0	0	1	2	2	0	0	2	2	2	2	2	0	2	2	2	0	2	0	0	2	0	2	0	1	1	0	1	2	2	2	2
chr15:24420951-24421717	fixed_Ppa-Ptre-Ptrs-Ptrt-Ptrv	766	GABRB3	0	2	2	3	2	2	2	0	2	0	0	2	2	2	3	2	2	2	0	2	2	0	2	2	0	0	2	2	0	2	2	2	2	2	0	2	0	2	2	2	2	2	0	2	0	0
chr15:25112210-25114548	fixed_Ppa-Ptre-Ptrs-Ptrt-Ptrv	2338	GABRG3	0	2	2	2	2	2	2	0	2	0	0	2	2	2	2	2	2	2	0	2	2	0	2	2	0	0	2	2	0	2	2	2	2	2	0	2	0	2	2	2	2	2	0	2	0	0
chr15:27635794-27636569	fixed_Gbeg-Ggod-Ggog	775	FAM189A1	2	2	0	0	2	2	0	1	0	2	2	0	0	2	0	0	0	2	2	0	0	2	0	2	3	2	0	2	2	2	0	2	0	0	2	0	2	0	0	0	0	0	2	2	1	2
chr15:27768937-27779290	fixed_Ppa-Ptre-Ptrs-Ptrt-Ptrv	10353		0	2	2	2	2	2	2	0	2	0	0	2	2	2	2	2	2	2	0	2	2	0	2	2	0	0	2	2	0	2	2	2	2	2	0	2	0	2	2	2	2	2	0	2	0	0
chr15:32061999-32063846	fixed_Ppa	1847	AVEN,CHRM5	2	2	2	3	1	2	3	0	2	2	1	2	2	2	2	2	2	1	0	2	2	2	2	2	2	2	2	1	2	2	2	2	2	2	0	2	2	3	2	2	2	2	0	2	0	0
chr15:35682521-35683971	fixed_Ptre-Ptrs-Ptrt-Ptrv	1450		0	2	2	2	2	2	2	2	2	0	0	2	2	2	2	2	2	2	2	2	2	0	2	2	0	0	2	2	0	2	2	2	2	2	2	2	0	2	2	2	2	1	2	2	2	2
chr15:38227364-38231737	fixed_Gbeg-Ggod-Ggog	4373		2	2	0	0	2	2	0	2	0	2	2	0	0	2	0	0	0	2	2	0	0	2	0	2	2	2	0	2	2	2	0	2	0	0	3	0	2	0	0	0	0	0	2	2	2	2
chr15:44055882-44059833	fixed_Pab-Ppy	3951		2	0	2	2	0	0	2	2	2	2	2	2	2	2	2	2	2	0	2	2	2	2	2	0	2	2	2	0	2	0	2	0	2	2	2	2	2	2	2	2	2	2	2	2	2	2
chr15:44870322-44882236	fixed_Pab-Ppy	11914	MIR548A3	1	0	2	2	0	0	2	2	2	2	2	2	2	2	2	2	2	0	2	2	2	2	2	0	2	2	1	0	2	0	2	0	2	2	2	2	2	2	2	2	2	2	2	2	2	2
chr15:46470034-46470814	fixed_Pab-Ppy	780		2	0	2	2	0	0	2	2	2	2	2	2	2	2	2	1	2	0	2	2	2	2	2	0	1	2	2	0	2	0	2	0	2	2	2	2	2	2	2	2	1	2	2	2	2	2
chr15:47833059-47835782	fixed_Ppa-Ptre-Ptrs-Ptrt-Ptrv	2723		0	2	2	2	2	2	2	0	2	0	0	2	2	2	2	2	2	2	0	2	2	0	2	2	0	0	2	2	0	2	2	2	2	2	0	2	0	2	2	2	2	2	0	2	0	0
chr15:51914428-51915905	fixed_Gbeg-Ggod-Ggog	1477		2	2	0	0	2	2	0	2	0	2	1	0	0	2	0	0	0	2	2	0	0	2	0	2	2	2	0	2	2	2	0	2	0	0	2	0	2	0	0	0	0	0	2	2	2	2
chr15:52427146-52428828	fixed_Pab-Ppy	1682	UNC13C	2	0	1	2	0	0	2	2	2	2	1	2	2	2	2	1	2	0	2	2	2	2	2	0	2	2	2	0	2	0	2	0	2	2	2	2	1	2	2	1	2	2	2	2	2	2
chr15:52744574-52747293	fixed_Gbeg-Ggod-Ggog	2719		2	2	0	0	2	2	0	1	0	2	1	0	0	2	0	0	0	2	1	0	0	2	0	2	2	2	0	2	1	1	0	1	0	0	1	0	2	0	0	0	0	0	2	2	2	2
chr15:53809482-53814202	fixed_Gbeg-Ggod-Ggog	4720	PRTG	2	2	0	0	1	2	0	2	0	2	2	0	0	2	0	0	0	1	2	0	0	2	0	2	2	2	0	2	2	2	0	2	0	0	2	0	1	0	0	0	0	0	2	2	2	2
chr15:53932661-53935142	fixed_Pab-Ppy	2481	NEDD4	2	0	2	2	0	0	2	2	2	2	2	2	2	2	2	2	2	0	2	2	2	2	2	0	2	2	2	0	2	0	2	0	2	2	2	2	2	2	2	2	2	2	2	3	2	2
chr15:55550494-55551088	fixed_Gbeg-Ggod-Ggog	594	CGNL1	2	2	0	0	2	2	0	2	0	2	2	0	0	2	0	0	0	2	2	0	0	2	0	2	1	2	0	2	2	3	0	2	0	0	2	0	2	0	0	0	0	0	2	2	2	2
chr15:55586841-55587746	fixed_Pab-Ppy	905	CGNL1	2	0	3	2	0	0	2	2	2	2	2	2	2	2	2	2	2	0	2	2	2	2	2	0	2	2	2	0	2	0	2	0	2	2	1	2	1	2	2	2	2	2	1	2	2	2
chr15:57685447-57693673	fixed_Pab-Ppy	8226	GCNT3	2	0	2	2	0	0	2	2	2	2	1	2	2	2	2	2	2	0	2	2	2	2	2	0	2	2	2	0	2	0	2	0	2	2	2	2	2	2	2	2	2	2	2	2	2	2
chr15:57701883-57702496	fixed_Gbeg-Ggod-Ggog	613		2	2	0	0	2	2	0	1	0	2	1	0	0	1	0	0	0	1	1	0	0	2	0	2	2	1	0	2	2	1	0	2	0	0	2	0	1	0	0	0	0	0	1	2	2	2
chr15:59359363-59359975	fixed_Pab-Ppy	612		1	0	2	2	0	0	2	2	2	2	1	2	2	2	2	2	2	0	2	3	2	2	2	0	2	2	2	0	2	0	2	0	2	2	2	2	2	2	2	2	2	2	2	3	2	2
chr15:60270643-60277842	fixed_Ppa-Ptre-Ptrs-Ptrt-Ptrv	7199		0	2	2	2	2	2	2	0	2	0	0	2	2	2	2	2	2	2	0	2	2	0	2	2	0	0	2	2	0	2	2	2	2	2	0	2	0	2	2	2	2	2	0	2	0	0
chr15:61064622-61067122	fixed_Pab-Ppy	2500		2	0	2	2	0	0	3	2	2	2	2	2	2	2	2	2	2	0	2	2	2	2	2	0	2	2	2	0	2	0	2	0	2	2	2	2	2	2	2	2	2	2	2	2	2	2
chr15:61370552-61375658	fixed_Pab-Ppy	5106	APH1B	2	0	2	2	0	0	2	2	2	2	2	2	2	2	2	2	2	0	2	2	2	2	2	0	2	2	2	0	2	0	2	0	2	2	2	2	2	2	2	2	2	2	2	2	2	2
chr15:62311601-62314203	fixed_Gbeg-Ggod-Ggog	2602	CSNK1G1	1	2	0	0	2	2	0	2	0	2	2	0	0	2	0	0	0	2	2	0	0	2	0	2	2	2	0	2	2	2	0	2	0	0	2	0	2	0	0	0	0	0	2	2	2	2
chr15:63607846-63610494	fixed_Pab-Ppy	2648	PTPLAD1	2	0	2	2	0	0	3	2	2	2	2	2	1	2	2	2	2	0	2	2	2	2	2	0	2	2	2	0	2	0	2	0	2	1	2	2	2	2	1	2	2	2	2	2	2	2
chr15:74129153-74131827	fixed_Gbeg-Ggod-Ggog	2674		2	2	0	0	2	2	0	2	0	1	1	0	0	2	0	0	0	2	2	0	0	2	0	1	2	2	0	2	2	2	0	2	0	0	2	0	1	0	0	0	0	0	2	2	2	2
chr15:75332373-75357849	fixed_Pab-Ppy	25476	PEAK1	2	0	2	2	0	0	2	2	2	2	2	2	2	2	2	2	2	0	2	2	2	2	2	0	2	2	2	0	2	0	2	0	2	2	2	2	1	2	2	2	2	1	2	2	2	2
chr15:78419577-78421813	fixed_Pab-Ppy	2236	LOC283688	2	0	2	2	0	0	3	2	2	2	2	2	2	2	2	2	2	0	2	2	2	2	2	0	2	2	2	0	2	0	2	0	2	2	2	2	2	3	2	2	2	2	2	2	2	2
chr15:80170662-80172318	fixed_Ppa-Ptre-Ptrs-Ptrt-Ptrv	1656		0	2	2	2	2	2	2	0	2	0	0	2	2	2	2	2	2	2	0	2	2	0	2	2	0	0	2	2	0	2	2	2	2	2	0	2	0	2	2	2	2	2	0	2	0	0
chr15:81953178-81966626	fixed_Gbeg-Ggod-Ggog	13448	SH3GL3	2	2	0	0	1	2	0	2	0	2	1	0	0	2	0	0	0	2	2	0	0	2	0	2	2	2	0	2	2	2	0	2	0	0	2	0	2	0	0	0	0	0	2	2	2	2
chr15:83312371-83317182	fixed_Gbeg-Ggod-Ggog	4811		2	2	0	0	1	2	0	2	0	2	1	0	0	2	0	0	0	2	2	0	0	2	0	2	2	2	0	2	2	1	0	1	0	0	2	0	2	0	0	0	0	0	2	2	2	2
chr15:83861400-83863902	fixed_Pab-Ppy	2502	AKAP13	2	0	2	2	0	0	2	2	2	2	1	2	2	2	2	2	2	0	2	2	2	2	2	0	2	2	2	0	2	0	2	0	2	2	1	2	1	2	2	2	2	2	1	2	1	2
chr15:84041997-84046578	fixed_Pab-Ppy	4581	AKAP13	2	0	2	2	0	0	2	2	2	2	1	2	2	2	2	2	2	0	2	2	2	2	2	0	2	2	2	0	2	0	2	0	2	2	2	2	2	2	1	2	2	2	2	2	2	2
chr15:84730952-84736286	fixed_Pab-Ppy	5334	AGBL1	2	0	2	2	0	0	2	2	2	2	2	2	2	2	2	2	2	0	2	2	2	2	2	0	2	2	2	0	2	0	2	0	2	2	2	2	2	2	2	2	2	2	2	2	2	2
chr15:89770877-89776507	fixed_Ppa	5630		2	2	2	2	1	2	2	0	2	2	2	2	2	2	2	2	2	1	0	2	2	2	2	2	2	2	2	2	2	2	2	2	2	2	0	2	2	2	2	2	2	2	0	2	0	0
chr15:91964112-91968436	fixed_Ppa-Ptre-Ptrs-Ptrt-Ptrv	4324		0	2	2	2	2	2	2	0	1	0	0	2	2	1	2	1	2	2	0	2	2	0	1	2	0	0	2	1	0	1	2	2	2	2	0	2	0	1	2	2	2	2	0	2	0	0
chr15:92381331-92381922	fixed_Ppa-Ptre-Ptrs-Ptrt-Ptrv	591		0	1	1	1	2	2	2	0	2	0	0	2	1	2	2	2	2	1	0	2	2	0	2	1	0	0	2	1	0	2	2	2	2	2	0	2	0	2	2	2	2	2	0	2	0	0
chr15:92490106-92491739	fixed_Pab-Ppy	1633		2	0	2	2	0	0	2	2	2	2	1	2	1	2	2	2	2	0	2	2	1	2	2	0	2	2	1	0	2	0	2	0	1	2	2	2	2	2	2	1	2	1	2	2	2	2
chr15:92873778-92874708	fixed_Gbeg-Ggod-Ggog	930		1	1	0	0	1	1	0	1	0	1	1	0	0	1	0	0	0	1	1	0	0	1	0	1	1	1	0	1	1	1	0	1	0	0	1	0	2	0	0	0	0	0	1	1	1	1
chr15:93967709-93968209	fixed_Pab-Ppy	500		2	0	1	2	0	0	2	2	2	2	1	2	2	2	2	2	2	0	2	2	2	2	2	0	2	2	2	0	2	0	2	0	2	2	2	2	2	2	2	2	1	1	2	2	2	2
chr15:94368502-94372574	fixed_Ppa-Ptre-Ptrs-Ptrt-Ptrv	4072		0	1	1	1	1	1	1	0	1	0	0	1	1	1	1	1	2	1	0	1	1	0	1	1	0	0	1	2	0	1	1	2	1	1	0	1	0	1	1	1	1	1	0	1	0	0
chr15:94442737-94446250	fixed_Pab-Ppy	3513		2	0	2	2	0	0	2	2	2	2	2	2	2	2	2	2	2	0	2	2	2	2	1	0	2	2	2	0	2	0	2	0	2	1	2	2	2	2	1	2	2	2	2	2	2	2
chr15:94905943-94907157	fixed_Pab-Ppy	1214		2	0	2	2	0	0	2	2	2	2	2	2	2	2	2	2	2	0	2	2	2	2	2	0	2	3	2	0	2	0	3	0	2	2	2	2	2	2	2	2	2	2	3	2	2	2
chr15:95021747-95024548	fixed_Gbeg-Ggod-Ggog	2801		2	2	0	0	2	2	0	2	0	2	2	0	0	2	0	0	0	2	2	0	0	2	0	2	2	2	0	2	1	2	0	2	0	0	2	0	2	0	0	0	0	0	2	2	2	2
chr15:100173744-100194271	fixed_Gbeg-Ggod-Ggog	20527	OR4F15	2	2	0	0	2	2	0	2	0	2	2	0	0	2	0	0	0	2	2	0	0	2	0	2	2	2	0	2	2	2	0	2	0	0	2	0	2	0	0	0	0	0	2	2	2	2
chr15:100194271-100237883	Gbeg-Ggod-Ggog-Pab-Ppy	43612	OR4F13P	8	0	0	0	0	0	0	13	0	8	7	0	0	15	0	0	0	0	13	0	0	8	0	0	7	8	0	0	6	0	0	0	0	0	14	0	8	0	0	0	0	0	13	13	13	16
chr15:100237883-100244871	fixed_Pab-Ppy	6988		10	0	11	14	0	0	14	17	15	9	8	14	14	17	14	13	11	0	18	12	12	10	15	0	9	9	14	0	8	0	13	0	10	10	16	11	11	18	11	12	13	10	18	13	18	22
chr16:347157-360597	fixed_Gbeg-Ggod-Ggog	13440	MRPL28	2	2	0	0	2	2	0	2	0	3	2	0	0	2	0	0	0	2	2	0	0	2	0	2	2	3	0	1	2	2	0	2	0	0	2	0	3	0	0	0	0	0	2	3	2	2
chr16:809450-815715	fixed_Pab-Ppy	6265		2	0	2	2	0	0	2	2	2	2	2	2	2	2	2	2	2	0	2	2	2	2	2	0	2	2	2	0	3	0	1	0	2	2	2	2	2	2	2	2	3	2	2	2	2	2
chr16:1682497-1682997	fixed_Gbeg-Ggod-Ggog	500	HN1L	2	1	0	0	2	1	0	2	0	2	2	0	0	2	0	0	0	1	2	0	0	2	0	2	2	2	0	2	2	1	0	2	0	0	1	0	2	0	0	0	0	0	2	2	2	2
chr16:1914748-1919974	fixed_Gbeg-Ggod-Ggog	5226		2	2	0	0	2	2	0	2	0	2	2	0	0	2	0	0	0	2	3	0	0	2	0	2	2	2	0	2	2	2	0	2	0	0	2	0	2	0	0	0	0	0	3	2	2	2
chr16:2364749-2366033	fixed_Pab-Ppy	1284	ABCA17P	2	0	2	1	0	0	2	2	2	2	2	2	2	2	2	1	2	0	2	1	2	2	2	0	2	2	2	0	3	0	2	0	2	2	2	2	2	2	2	2	2	2	2	2	2	2
chr16:2396620-2402260	fixed_Pab-Ppy	5640	ABCA17P	2	0	2	2	0	0	2	2	2	2	2	2	2	2	2	2	2	0	2	2	2	2	2	0	2	2	2	0	2	0	2	0	2	2	2	2	2	2	2	2	2	2	2	2	2	2
chr16:3201824-3205196	fixed_Ppa-Ptre-Ptrs-Ptrt-Ptrv	3372		0	2	2	2	2	2	2	0	2	0	0	2	2	2	2	2	2	1	0	2	2	0	2	2	0	0	2	2	0	2	2	2	2	2	0	2	0	2	2	2	2	2	0	2	0	0
chr16:3284629-3286645	fixed_Ppa-Ptre-Ptrs-Ptrt-Ptrv	2016		0	2	2	2	2	2	2	0	2	0	0	3	2	2	2	2	2	2	0	1	2	0	2	2	0	0	2	2	0	2	2	2	2	2	0	2	0	2	2	2	2	2	0	2	0	0
chr16:4479955-4481245	fixed_Pab-Ppy	1290	HMOX2	1	0	2	2	0	0	1	2	2	2	2	2	2	2	2	2	2	0	2	2	2	2	2	0	2	2	3	0	2	0	2	0	2	2	2	2	2	2	2	2	2	1	2	2	2	2
chr16:4590790-4593964	fixed_Pab-Ppy	3174		2	0	2	2	0	0	2	2	2	2	2	2	2	2	2	1	2	0	1	1	2	2	2	0	2	2	2	0	2	0	1	0	2	2	2	1	2	1	2	2	2	2	2	1	2	2
chr16:7227281-7238603	fixed_Hde	11322	RBFOX1	2	2	2	2	2	2	2	2	2	2	2	2	2	2	2	2	2	2	2	2	2	2	2	2	2	2	2	2	2	2	2	2	2	2	2	2	2	2	2	2	2	2	2	2	2	2
chr16:8203015-8206294	fixed_Gbeg-Ggod-Ggog	3279		1	1	0	0	2	1	0	2	0	2	2	0	0	2	0	0	0	1	2	0	0	2	0	1	2	2	0	1	1	1	0	1	0	0	2	0	2	0	0	0	0	0	2	2	2	2
chr16:8417268-8426912	fixed_Gbeg-Ggod-Ggog	9644		2	2	0	0	2	2	0	2	0	2	2	0	0	2	0	0	0	2	2	0	0	2	0	2	2	2	0	2	2	2	0	2	0	0	2	0	2	0	0	0	0	0	2	2	2	2
chr16:8512330-8518543	fixed_Hde	6213		2	2	2	2	2	2	2	2	2	2	2	2	2	2	2	2	2	2	2	2	2	2	2	2	2	3	2	2	2	2	2	2	2	2	2	2	2	2	2	2	2	2	2	3	2	2
chr16:8650794-8657378	fixed_Pab-Ppy	6584		2	0	2	2	0	0	2	2	2	2	2	2	2	2	2	2	2	0	2	2	2	2	2	0	2	2	2	0	2	0	2	0	2	2	2	2	2	2	2	2	2	2	2	2	2	2
chr16:9222410-9231985	fixed_Gbeg-Ggod-Ggog	9575		2	2	0	0	1	2	0	2	0	2	1	0	0	2	0	0	0	2	2	0	0	2	0	2	2	2	0	2	2	2	0	2	0	0	2	0	2	0	0	0	0	0	2	2	2	2
chr16:11065133-11072238	fixed_Pab-Ppy	7105	CLEC16A	2	0	2	2	0	0	2	2	3	2	2	2	2	2	2	2	2	0	2	2	2	2	2	0	2	2	2	0	3	0	2	0	2	2	2	2	2	2	2	2	2	2	2	2	2	2
chr16:12134328-12139241	fixed_Ppa-Ptre-Ptrs-Ptrt-Ptrv	4913	SNX29	0	2	2	2	2	2	1	0	2	0	0	2	2	2	2	2	2	1	0	2	2	0	2	2	0	0	2	2	0	2	2	2	2	2	0	2	0	2	2	2	2	2	0	2	0	0
chr16:12855661-12858794	fixed_Gbeg-Ggod-Ggog	3133		2	2	0	0	1	2	0	2	0	2	2	0	0	2	0	0	0	2	2	0	0	2	0	2	2	2	0	2	2	2	0	2	0	0	2	0	2	0	0	0	0	0	2	2	2	2
chr16:13521463-13523200	fixed_Ppa-Ptre-Ptrs-Ptrt-Ptrv	1737		0	2	2	2	2	3	2	0	2	0	0	2	2	2	2	3	2	2	0	2	2	0	2	2	0	0	2	2	0	2	2	2	2	2	0	2	0	2	2	2	1	2	0	2	0	0
chr16:13888317-13889296	fixed_Gbeg-Ggod-Ggog	979		2	2	0	0	2	1	0	2	0	2	2	0	0	2	0	0	0	2	2	0	0	2	0	1	2	2	0	1	2	1	0	1	0	0	2	0	2	0	0	0	0	0	2	2	2	2
chr16:14794937-14802920	fixed_Gbeg-Ggod-Ggog	7983		2	4	0	0	4	4	0	2	0	2	2	0	0	8	0	0	0	4	2	0	0	2	0	4	2	2	0	4	2	5	0	4	0	0	2	0	2	0	0	0	0	0	2	9	2	2
chr16:15329610-15336822	fixed_Gbeg-Ggod-Ggog	7212		2	4	0	0	4	4	0	2	0	2	2	0	0	8	0	0	0	4	2	0	0	2	0	4	2	2	0	4	2	4	0	5	0	0	2	0	2	0	0	0	0	0	2	9	2	2
chr16:16422675-16430487	fixed_Gbeg-Ggod-Ggog	7812		2	4	0	0	4	4	0	2	0	2	2	0	0	8	0	0	0	4	2	0	0	2	0	3	2	2	0	4	2	4	0	4	0	0	2	0	2	0	0	0	0	0	2	8	2	2
chr16:17977934-17982851	fixed_Pab-Ppy	4917		2	0	3	2	0	0	2	2	3	2	2	2	3	2	2	2	2	0	2	3	3	2	3	0	2	2	3	0	2	0	3	0	3	3	2	3	2	3	2	3	3	3	2	2	2	2
chr16:18282457-18289730	fixed_Gbeg-Ggod-Ggog	7273		2	4	0	0	4	4	0	2	0	2	2	0	0	8	0	0	0	4	2	0	0	2	0	3	2	2	0	4	2	4	0	4	0	0	2	0	2	0	0	0	0	0	2	9	3	2
chr16:20420062-20438846	fixed_Ppa-Ptre-Ptrs-Ptrt-Ptrv	18784		0	2	2	2	2	2	2	0	2	0	0	2	2	2	2	2	2	2	0	2	2	0	2	2	0	0	2	2	0	2	2	2	2	2	0	2	0	2	2	2	2	2	0	2	0	0
chr16:20451767-20455354	fixed_Pab-Ppy	3587		4	0	4	4	0	0	4	4	4	4	3	4	3	4	4	3	4	0	4	4	4	4	4	0	4	4	4	0	3	0	4	0	3	4	4	4	4	4	4	4	4	4	4	4	4	4
chr16:20578105-20587228	fixed_Ppa	9123	ACSM1	2	3	2	2	3	3	2	0	2	2	2	2	2	2	2	2	2	3	0	2	2	2	2	3	2	2	2	3	2	4	2	4	2	2	0	2	2	2	2	2	2	2	0	3	0	0
chr16:20590491-20604266	fixed_Ppa	13775	ACSM1	2	4	2	2	4	4	2	0	2	2	1	2	2	2	2	2	2	3	0	2	2	2	2	3	2	2	2	3	2	3	2	4	2	2	0	2	2	2	2	2	2	2	0	2	0	0
chr16:20604266-20629066	fixed_Ppa-Ptre-Ptrs-Ptrt-Ptrv	24800	ACSM1	0	4	2	2	3	4	2	0	2	0	0	2	2	2	2	2	2	3	0	2	2	0	2	3	0	0	2	3	0	4	2	4	2	2	0	2	0	2	2	2	2	2	0	2	0	0
chr16:25115787-25116989	fixed_Pab-Ppy	1202		2	0	2	2	0	0	2	2	2	2	2	2	2	2	2	2	2	0	2	2	2	2	2	0	2	2	3	0	2	0	2	0	2	2	2	2	2	2	2	2	2	2	2	2	2	2
chr16:25295582-25299399	fixed_Hde	3817		1	2	2	2	2	2	2	2	2	2	2	2	2	2	2	3	2	2	2	2	2	2	2	2	2	2	2	2	2	2	2	2	1	2	2	2	2	2	2	2	2	2	2	2	2	2
chr16:25304750-25309277	fixed_Pab-Ppy	4527		2	0	2	2	0	0	2	2	2	2	2	2	2	2	2	2	2	0	2	2	2	2	2	0	2	2	2	0	2	0	2	0	2	2	2	2	2	2	2	2	2	2	2	2	2	2
chr16:31482251-31487750	fixed_Gbeg-Ggod-Ggog	5499	CSDAP1	1	2	0	0	2	2	0	1	0	1	1	0	0	3	0	0	0	2	1	0	0	1	0	2	1	1	0	2	2	2	0	2	0	0	1	0	1	0	0	0	0	0	1	3	1	1
chr16:31573832-31596505	fixed_Gbeg-Ggod-Ggog	22673		2	2	0	0	2	2	0	2	0	2	2	0	0	2	0	0	0	2	2	0	0	2	0	2	1	2	0	2	2	2	0	2	0	0	2	0	2	0	0	0	0	0	2	2	2	2
chr16:31700942-31711849	fixed_Gbeg-Ggod-Ggog	10907		2	1	0	0	1	1	0	2	0	2	2	0	0	3	0	0	0	1	2	0	0	2	0	1	2	2	0	1	2	1	0	1	0	0	2	0	2	0	0	0	0	0	2	3	2	2
chr16:31840972-31854843	fixed_Gbeg-Ggod-Ggog	13871		2	1	0	0	1	2	0	2	0	2	1	0	0	2	0	0	0	2	2	0	0	2	0	1	2	2	0	1	2	2	0	2	0	0	2	0	2	0	0	0	0	0	2	2	2	2
chr16:34174034-34177719	fixed_Ppa-Ptre-Ptrs-Ptrt-Ptrv	3685		0	5	2	2	4	5	2	0	2	0	0	2	2	2	2	2	2	4	0	2	2	0	2	4	0	0	2	5	0	5	2	5	2	2	0	2	0	2	2	2	2	2	0	2	0	0
chr16:34204521-34215991	fixed_Ptre-Ptrs-Ptrt-Ptrv	11470		0	5	3	4	4	6	5	2	4	0	0	4	4	2	5	4	4	4	1	5	4	0	3	4	0	0	4	4	0	5	5	5	4	4	2	4	0	5	4	5	3	4	2	2	1	3
chr16:34646735-34847303	fixed_Pab-Ppy	200568	RN5S411,FLJ26245	2	0	2	2	0	0	2	2	2	2	2	2	2	2	2	2	2	0	2	2	2	2	2	0	2	2	2	0	2	0	3	0	2	2	2	2	2	2	2	2	2	2	2	2	2	2
chr16:34896650-34955427	fixed_Pab-Ppy	58777		2	0	2	2	0	0	2	2	2	2	2	2	2	2	2	2	2	0	2	2	2	2	2	0	2	2	2	0	2	0	2	0	2	2	2	2	2	2	2	2	2	2	2	2	2	2
chr16:35006368-35143499	fixed_Pab-Ppy	137131		1	0	1	1	0	0	2	1	1	1	1	2	1	1	1	1	2	0	2	2	1	1	1	0	1	1	2	0	2	0	2	0	1	2	1	2	1	2	1	2	1	1	1	2	1	1
chr16:45684229-45698691	fixed_Ppa-Ptre-Ptrs-Ptrt-Ptrv	14462	NETO2	0	2	2	2	2	2	2	0	2	0	0	2	2	2	2	2	2	2	0	2	2	0	2	2	0	0	2	2	0	2	2	2	2	2	0	2	0	2	2	2	2	2	0	2	0	0
chr16:54481463-54491695	fixed_Hde	10232	CES5A	2	2	2	2	2	2	3	2	2	2	2	2	2	2	2	2	2	2	2	2	2	2	2	2	2	2	2	2	2	3	2	2	2	2	2	2	2	2	2	2	2	2	2	2	2	2
chr16:55237342-55240050	fixed_Ppa-Ptre-Ptrs-Ptrt-Ptrv	2708		0	1	2	2	2	2	2	0	2	0	0	2	2	2	1	3	2	2	0	2	2	0	2	2	0	0	2	2	0	2	2	2	2	2	0	1	0	2	2	2	2	2	0	2	0	0
chr16:57949444-57960623	fixed_Gbeg-Ggod-Ggog	11179		2	2	0	0	2	2	0	2	0	2	2	0	0	2	0	0	0	2	2	0	0	2	0	2	2	2	0	2	2	2	0	2	0	0	2	0	2	0	0	0	0	0	2	2	2	2
chr16:59292292-59300105	fixed_Gbeg-Ggod-Ggog	7813		2	2	0	0	1	2	0	2	0	2	2	0	0	2	0	0	0	2	2	0	0	2	0	2	2	2	0	2	2	2	0	2	0	0	2	0	2	0	0	0	0	0	2	2	2	2
chr16:60058072-60061619	fixed_Pab-Ppy	3547		2	0	2	2	0	0	2	2	2	2	2	2	2	2	2	2	2	0	2	2	2	2	2	0	2	2	2	0	2	0	2	0	2	2	2	2	2	2	2	2	2	2	2	2	2	2
chr16:60495301-60499642	fixed_Hde	4341	CDH8	2	2	2	2	2	2	2	2	2	2	2	2	2	2	2	2	2	2	2	2	2	2	2	1	2	2	2	2	2	2	2	2	2	2	2	2	2	2	2	2	2	2	2	2	2	2
chr16:60850267-60855752	fixed_Ppa-Ptre-Ptrs-Ptrt-Ptrv	5485		0	2	2	2	2	2	2	0	2	0	0	2	2	2	2	1	2	2	0	2	1	0	2	2	0	0	2	2	0	2	2	2	2	2	0	2	0	2	2	2	2	2	0	2	0	0
chr16:61786171-61787677	fixed_Pab-Ppy	1506		2	0	2	2	0	0	2	2	2	2	2	2	2	2	2	2	2	0	2	2	2	2	2	0	2	2	2	0	2	0	2	0	2	2	2	2	2	2	2	2	2	2	2	2	2	2
chr16:62474760-62480319	fixed_Hde	5559		2	2	2	2	2	2	2	2	2	2	2	2	2	2	2	2	2	2	2	2	2	2	2	2	2	2	2	2	2	2	2	2	2	2	2	2	2	2	2	2	2	2	2	2	2	2
chr16:63001471-63002389	fixed_Ppa	918		2	2	2	1	2	2	2	0	2	2	2	2	2	2	2	2	2	1	0	2	2	2	2	2	2	2	2	2	2	2	2	2	2	1	0	2	2	2	1	2	2	1	0	2	0	0
chr16:66191344-66193900	fixed_Pab-Ppy	2556	CTCF	2	0	2	2	0	0	2	2	1	2	2	2	2	2	2	2	1	0	2	2	2	2	2	0	2	2	2	0	2	0	2	0	2	2	2	1	2	1	2	1	2	2	2	2	2	2
chr16:66366088-66374859	fixed_Ppa-Ptre-Ptrs-Ptrt-Ptrv	8771	RANBP10	0	2	2	2	2	2	2	0	2	0	0	2	2	2	2	2	2	2	0	2	2	0	2	2	0	0	2	2	0	2	2	2	2	2	0	2	0	2	2	2	2	2	0	2	0	0
chr16:66610077-66611605	fixed_Pab-Ppy	1528		2	0	2	2	0	0	2	7	2	2	1	2	2	2	2	1	1	0	12	2	2	6	2	0	2	2	2	0	4	0	2	0	2	2	7	2	5	1	2	2	2	1	4	2	7	5
chr16:68639751-68657249	fixed_Pab-Ppy	17498	PDXDC2P	6	0	3	3	0	0	2	6	2	6	5	3	3	4	2	3	3	0	6	3	3	6	3	0	6	6	3	0	7	0	2	0	3	3	6	3	6	3	3	3	3	3	6	6	6	6
chr16:69959090-69962332	fixed_Gbeg-Ggod-Ggog	3242	CALB2	2	2	0	0	2	2	0	2	0	2	2	0	0	2	0	0	0	2	2	0	0	2	0	2	2	2	0	2	2	2	0	2	0	0	2	0	2	0	0	0	0	0	2	2	2	2
chr16:70078334-70080313	fixed_Pab-Ppy	1979	ZNF19	2	0	2	2	0	0	2	2	2	2	2	2	2	2	2	2	2	0	2	2	2	1	2	0	2	2	2	0	1	0	1	0	2	2	2	2	2	2	2	2	2	2	2	2	2	2
chr16:70726468-70727790	fixed_Pab-Ppy	1322	PMFBP1	2	0	2	2	0	0	2	2	2	2	1	2	2	2	2	2	2	0	2	2	2	2	2	0	2	2	2	0	2	0	3	0	2	2	2	2	2	2	2	2	2	2	2	2	2	2
chr16:70855949-70858727	fixed_Pab-Ppy	2778		2	0	2	2	0	0	2	2	2	2	2	2	2	2	2	2	2	0	2	2	2	2	2	0	2	2	2	0	2	0	2	0	2	2	2	2	2	2	2	2	2	2	2	2	2	2
chr16:71160110-71161860	fixed_Ppa-Ptre-Ptrs-Ptrt-Ptrv	1750		0	2	2	2	2	2	2	0	2	0	0	2	2	2	2	2	2	1	0	2	2	0	2	2	0	0	1	2	0	2	2	2	2	2	0	2	0	2	2	2	2	2	0	1	0	0
chr16:75381888-75384857	fixed_Ppa	2969		2	2	2	2	2	2	2	0	2	2	1	2	2	2	2	2	1	2	0	2	2	2	2	2	2	2	2	2	2	2	2	2	2	2	0	2	2	2	2	2	2	2	0	2	0	0
chr16:76155119-76159545	fixed_Pab-Ppy	4426		2	0	2	2	0	0	2	2	2	2	2	2	2	2	2	3	2	0	2	2	2	2	2	0	2	2	2	0	2	0	2	0	2	2	2	2	2	2	2	2	2	2	2	2	2	2
chr16:76369768-76372661	fixed_Gbeg-Ggod-Ggog	2893		2	2	0	0	2	2	0	2	0	2	2	0	0	2	0	0	0	2	2	0	0	2	0	2	2	2	0	2	1	2	0	2	0	0	2	0	2	0	0	0	0	0	2	2	1	2
chr16:76966721-76968235	fixed_Ppa-Ptre-Ptrs-Ptrt-Ptrv	1514	WWOX	0	2	2	1	2	2	2	0	1	0	0	2	2	2	1	1	1	2	0	2	1	0	1	2	0	0	2	2	0	2	1	2	2	2	0	2	0	2	2	2	2	2	0	2	0	0
chr16:77614860-77620848	fixed_Ppa-Ptre-Ptrs-Ptrt-Ptrv	5988	WWOX	0	2	2	2	2	2	2	0	2	0	0	2	2	2	2	2	2	1	0	2	2	0	2	1	0	0	2	1	0	2	2	2	2	2	0	2	0	2	2	2	2	2	0	2	0	0
chr16:78450465-78452283	fixed_Ppa-Ptre-Ptrs-Ptrt-Ptrv	1818		0	2	2	3	2	2	2	0	2	0	0	2	1	2	2	2	2	2	0	2	2	0	2	2	0	0	2	2	0	2	2	2	2	2	0	2	0	2	2	2	2	2	0	2	0	0
chr16:79713099-79714609	fixed_Gbeg-Ggod-Ggog	1510	PKD1L2	2	2	0	0	2	1	0	2	0	2	1	0	0	2	0	0	0	1	2	0	0	2	0	2	2	2	0	1	2	2	0	1	0	0	2	0	2	0	0	0	0	0	2	2	2	2
chr16:85618586-85619899	fixed_Gbeg-Ggod-Ggog	1313		2	2	0	0	3	2	0	2	0	2	2	0	0	2	0	0	0	2	2	0	0	2	0	2	2	2	0	2	2	2	0	2	0	0	2	0	2	0	0	0	0	0	2	2	2	2
chr16:86529447-86534726	fixed_Ppa-Ptre-Ptrs-Ptrt-Ptrv	5279		0	1	4	3	2	2	3	0	3	0	0	3	3	2	3	4	3	2	0	3	3	0	4	2	0	0	4	2	0	2	3	2	3	3	0	3	0	4	3	4	3	4	0	2	0	0
chr16:88008754-88010842	fixed_Gbeg-Ggod-Ggog	2088	ANKRD11	2	2	0	0	2	2	0	2	0	2	2	0	0	2	0	0	0	2	2	0	0	2	0	2	2	2	0	2	2	2	0	2	0	0	2	0	2	0	0	0	0	0	2	2	2	2
chr16:88582641-88585528	fixed_Ppa-Ptre-Ptrs-Ptrt-Ptrv	2887	AFG3L1P	0	2	2	2	2	2	2	0	2	0	0	2	2	2	2	2	2	2	0	2	2	0	2	2	0	0	2	2	0	2	2	2	2	2	0	2	0	2	2	2	2	2	0	2	0	0
chr17:88516-89193	fixed_Pab-Ppy	677	RPH3AL	2	0	2	2	0	0	2	3	2	2	2	2	2	2	2	2	2	0	2	2	2	2	2	0	2	2	3	0	2	0	2	0	2	1	2	2	2	2	2	2	2	2	2	2	2	3
chr17:678796-683224	fixed_Gbeg-Ggod-Ggog	4428	NXN	2	1	0	0	1	1	0	2	0	2	1	0	0	2	0	0	0	1	1	0	0	2	0	1	2	1	0	1	2	1	0	1	0	0	2	0	2	0	0	0	0	0	2	2	1	2
chr17:808303-813723	fixed_Pab-Ppy	5420	NXN	2	0	2	1	0	0	1	2	2	2	1	2	2	2	2	2	2	0	2	1	2	2	2	0	2	2	2	0	2	0	1	0	2	2	2	1	2	1	2	2	2	2	2	2	2	2
chr17:3193745-3206887	fixed_Pab-Ppy	13142		1	0	2	2	0	0	2	2	2	2	1	2	2	2	2	2	2	0	2	2	2	2	2	0	2	2	2	0	2	0	2	0	2	2	2	2	2	2	2	2	2	2	2	2	2	2
chr17:3680147-3684248	fixed_Gbeg-Ggod-Ggog	4101	C17orf85	1	1	0	0	1	1	0	1	0	1	1	0	0	2	0	0	0	1	1	0	0	1	0	1	1	1	0	1	1	1	0	1	0	0	1	0	1	0	0	0	0	0	1	2	1	1
chr17:6045757-6051754	fixed_Ppa-Ptre-Ptrs-Ptrt-Ptrv	5997		0	2	2	2	2	2	2	0	2	0	0	2	2	2	2	2	2	2	0	2	2	0	2	2	0	0	2	2	0	2	2	2	2	2	0	2	0	2	2	2	2	2	0	2	0	0
chr17:6126615-6129870	fixed_Gbeg-Ggod-Ggog	3255		2	2	0	0	2	2	0	3	0	2	2	0	0	2	0	0	0	2	2	0	0	2	0	2	2	2	0	2	2	2	0	2	0	0	2	0	2	0	0	0	0	0	2	2	3	3
chr17:6252299-6252898	fixed_Ppa-Ptre-Ptrs-Ptrt-Ptrv	599		0	2	3	2	2	2	2	0	2	0	0	2	2	2	2	2	2	2	0	2	2	0	2	2	0	0	2	2	0	2	2	2	2	2	0	2	0	2	2	2	2	2	0	2	0	0
chr17:6562497-6570349	fixed_Ppa-Ptre-Ptrs-Ptrt-Ptrv	7852		0	1	1	1	2	2	1	0	1	0	0	2	1	2	2	1	1	2	0	1	2	0	1	2	0	0	2	2	0	2	1	2	1	2	0	2	0	1	2	2	2	2	0	2	0	0
chr17:6681309-6685830	fixed_Pab-Ppy	4521		2	0	2	2	0	0	2	2	2	2	1	2	2	2	2	2	2	0	2	2	2	2	2	0	2	2	2	0	2	0	2	0	2	2	2	2	2	2	2	2	2	2	2	2	2	2
chr17:15506123-15511065	fixed_Gbeg-Ggod-Ggog	4942	TRIM16	2	2	0	0	2	2	0	2	0	2	2	0	0	2	0	0	0	2	2	0	0	2	0	2	2	2	0	2	2	2	0	2	0	0	2	0	2	0	0	0	0	0	2	2	2	2
chr17:17172157-17176605	fixed_Pab-Ppy	4448	NT5M	2	0	2	1	0	0	1	2	1	2	1	2	1	2	2	2	1	0	2	1	1	2	1	0	2	2	2	0	2	0	1	0	2	1	2	1	2	1	1	1	1	1	2	2	1	2
chr17:19101306-19103164	fixed_Ptre	1858	EPN2	2	2	2	2	2	2	2	2	2	0	1	2	2	2	2	2	2	2	2	2	2	0	2	2	2	0	2	2	2	2	2	2	2	2	2	2	2	2	2	2	2	3	2	2	2	2
chr17:19988712-19994844	fixed_Gbeg-Ggod-Ggog	6132	SPECC1	2	2	0	0	2	2	0	2	0	1	1	0	0	2	0	0	0	2	2	0	0	2	0	2	1	1	0	2	2	2	0	2	0	0	1	0	2	0	0	0	0	0	1	2	2	2
chr17:20461735-20472835	fixed_Gbeg-Ggod-Ggog	11100		7	1	0	0	1	1	0	4	0	7	6	0	0	2	0	0	0	1	3	0	0	7	0	1	7	7	0	1	7	1	0	1	0	0	4	0	8	0	0	0	0	0	4	2	4	4
chr17:20768271-20771235	fixed_Ppa	2964		2	4	2	2	5	4	2	0	2	2	2	2	2	2	2	2	3	5	0	2	2	2	2	4	2	2	2	4	2	5	2	4	2	2	0	2	2	2	2	2	2	2	0	2	0	0
chr17:20960815-20961315	fixed_Pab-Ppy	500		2	0	2	2	0	0	2	2	2	2	1	2	2	2	2	2	2	0	2	2	1	2	2	0	2	2	2	0	2	0	2	0	2	2	2	2	2	2	2	2	2	2	2	2	2	2
chr17:23453443-23456735	fixed_Ppa-Ptre-Ptrs-Ptrt-Ptrv	3292	NLK	0	2	2	2	2	2	2	0	2	0	0	2	2	2	2	2	2	2	0	2	2	0	2	2	0	0	2	2	0	2	2	2	2	2	0	2	0	2	2	2	2	2	0	2	0	0
chr17:29265678-29270305	fixed_Gbeg-Ggod-Ggog	4627	ASIC2	2	2	0	0	2	2	0	2	0	2	2	0	0	2	0	0	0	2	2	0	0	2	0	2	2	2	0	2	2	2	0	2	0	0	2	0	2	0	0	0	0	0	2	2	2	2
chr17:34725512-34733195	fixed_Ppa-Ptre-Ptrs-Ptrt-Ptrv	7683	FBXL20	0	2	2	2	2	2	2	0	2	0	0	2	2	2	2	2	1	2	0	2	2	0	2	2	0	0	2	2	0	1	2	2	2	2	0	2	0	2	2	2	2	2	0	2	0	0
chr17:36324182-36327376	fixed_Gbeg	3194		2	2	2	2	2	2	2	2	2	2	2	2	2	2	2	2	2	2	2	2	2	2	0	2	2	2	2	1	2	2	2	2	2	2	2	2	2	2	2	2	2	2	2	2	2	2
chr17:36622094-36634655	fixed_Ppa-Ptre-Ptrs-Ptrt-Ptrv	12561		0	2	2	2	2	2	2	0	2	0	0	2	2	2	2	2	2	1	0	2	2	0	2	2	0	0	2	2	0	2	2	2	2	2	0	2	0	2	2	2	1	2	0	2	0	0
chr17:36700698-36709860	fixed_Ppa-Ptre-Ptrs-Ptrt-Ptrv	9162		0	2	2	2	2	2	2	0	2	0	0	2	2	2	2	2	2	2	0	2	2	0	2	2	0	0	2	2	0	2	2	2	2	2	0	2	0	2	2	2	2	2	0	2	0	0
chr17:36960695-36963283	fixed_Gbeg-Ggod-Ggog	2588	LOC147093	2	2	0	0	2	3	0	2	0	2	2	0	0	2	0	0	0	2	2	0	0	2	0	2	2	2	0	2	2	2	0	2	0	0	2	0	2	0	0	0	0	0	2	2	2	2
chr17:38206248-38207917	fixed_Pab-Ppy	1669	CNTD1	2	0	2	2	0	0	1	1	2	2	2	2	2	2	2	3	2	0	2	2	2	2	1	0	2	2	2	0	2	0	1	0	2	2	1	1	2	1	2	2	2	2	2	2	1	2
chr17:38743584-38749789	fixed_Pab-Ppy	6205		2	0	2	1	0	0	1	1	1	2	1	1	2	2	1	2	2	0	1	2	2	2	1	0	1	2	2	0	2	0	1	0	2	2	1	2	2	1	2	2	2	2	2	2	1	1
chr17:40049409-40055444	fixed_Ppa-Ptre-Ptrs-Ptrt-Ptrv	6035		0	2	2	1	2	2	3	0	2	0	0	2	2	2	2	2	2	2	0	2	2	0	2	2	0	0	2	2	0	2	1	2	2	2	0	2	0	2	3	2	2	2	0	2	0	0
chr17:40471436-40475060	Gbeg-Ggod-Ggog-Ppa-Ptre-Ptrs-Ptrt-Ptrv	3624	DCAKD	0	2	0	0	2	2	0	0	0	0	0	0	0	2	0	0	0	3	0	0	0	0	0	2	0	0	0	2	0	2	0	2	0	0	0	0	0	0	0	0	0	0	0	2	0	0
chr17:42827085-42856747	fixed_Ppa-Ptre-Ptrs-Ptrt-Ptrv	29662	C17orf57	0	2	2	2	2	2	2	0	2	0	0	2	2	2	2	2	2	2	0	2	2	0	2	2	0	0	2	2	0	2	2	2	2	2	0	2	0	2	2	2	2	2	0	2	0	0
chr17:42858833-42873833	fixed_Ppa-Ptre-Ptrs-Ptrt-Ptrv	15000	C17orf57	0	2	2	2	2	2	2	0	2	0	0	2	2	2	2	2	2	2	0	2	2	0	2	2	0	0	2	2	0	2	2	3	2	2	0	2	0	2	2	2	2	2	0	2	0	0
chr17:48262900-48264997	fixed_Gbeg	2097		2	2	2	2	2	2	2	2	1	2	2	2	2	2	2	1	2	2	2	2	2	2	0	2	2	2	2	2	2	2	2	2	2	2	2	2	2	2	1	2	2	1	2	2	2	2
chr17:48503284-48510166	fixed_Pab-Ppy	6882		2	0	2	2	0	0	2	2	2	2	2	2	2	2	2	2	2	0	2	2	2	2	2	0	2	2	2	0	1	0	2	0	2	2	2	2	2	2	2	2	2	2	2	2	2	2
chr17:48658799-48661785	Gbeg-Ggod-Ggog-Ppa-Ptre-Ptrs-Ptrt-Ptrv	2986		0	2	0	0	2	2	0	0	0	0	0	0	0	2	0	0	0	2	0	0	0	0	0	2	0	0	0	1	0	1	0	2	0	0	0	0	0	0	0	0	0	0	0	2	0	0
chr17:49004851-49005827	fixed_Ppa-Ptre-Ptrs-Ptrt-Ptrv	976		0	2	2	1	1	2	2	0	2	0	0	2	2	1	2	1	2	1	0	2	2	0	2	2	0	0	2	2	0	1	2	2	2	2	0	2	0	2	2	2	2	2	0	2	0	0
chr17:49898627-49901613	fixed_Gbeg-Ggod-Ggog	2986		2	2	0	0	2	2	0	2	0	2	1	0	0	1	0	0	0	2	2	0	0	2	0	2	1	2	0	1	2	2	0	2	0	0	2	0	2	0	0	0	0	0	2	2	2	2
chr17:50574651-50581269	fixed_Pab-Ppy	6618	STXBP4	2	0	2	2	0	0	2	2	2	2	2	2	2	2	2	2	2	0	2	2	2	2	2	0	2	2	2	0	2	0	2	0	2	2	2	2	2	2	2	2	2	2	2	2	2	2
chr17:57731834-57746982	Gbeg-Ggod-Ggog-Ppa-Ptre-Ptrs-Ptrt-Ptrv	15148		0	2	0	0	2	2	0	0	0	0	0	0	0	2	0	0	0	2	0	0	0	0	0	2	0	0	0	2	0	2	0	2	0	0	0	0	0	0	0	0	0	0	0	2	0	0
chr17:57746982-57751852	fixed_Ppa-Ptre-Ptrs-Ptrt-Ptrv	4870		0	2	2	2	2	2	2	0	2	0	0	2	2	2	2	2	2	2	0	2	2	0	2	2	0	0	2	2	0	2	2	2	2	2	0	2	0	2	2	1	2	1	0	2	0	0
chr17:57752352-57754225	fixed_Ppa-Ptre-Ptrs-Ptrt-Ptrv	1873		0	2	2	2	2	2	2	0	2	0	0	2	2	2	2	3	2	2	0	2	2	0	2	2	0	0	2	2	0	2	2	2	2	2	0	2	0	2	2	2	2	2	0	2	0	0
chr17:58241258-58243752	fixed_Pab-Ppy	2494	MIR548W	2	0	2	2	0	0	2	2	2	2	2	2	2	2	2	2	2	0	2	2	2	2	2	0	2	2	2	0	2	0	2	0	2	2	2	2	2	2	2	2	2	2	2	2	2	2
chr17:59673735-59675300	fixed_Hde	1565	TEX2	1	2	2	2	2	2	1	2	1	1	1	2	2	2	2	2	2	2	2	2	1	1	1	2	1	1	2	2	1	2	2	2	2	2	2	2	1	2	2	2	2	2	2	2	2	2
chr17:66505247-66507325	fixed_Gbeg-Ggod-Ggog	2078		2	2	0	0	2	2	0	2	0	2	1	0	0	2	0	0	0	2	2	0	0	2	0	2	2	2	0	2	2	2	0	2	0	0	2	0	2	0	0	0	0	0	2	2	2	2
chr17:66959188-66959821	fixed_Pab-Ppy	633		2	0	2	2	0	0	2	2	2	2	2	2	2	1	1	2	3	0	2	2	2	2	2	0	2	2	3	0	1	0	2	0	2	2	2	2	1	2	2	3	2	2	2	3	2	2
chr17:67099886-67102992	fixed_Ppa-Ptre-Ptrs-Ptrt-Ptrv	3106		0	2	2	2	2	2	2	0	2	0	0	2	2	2	2	2	2	2	0	2	2	0	2	2	0	0	2	2	0	2	2	2	2	2	0	2	0	2	2	2	2	2	0	2	0	0
chr17:67837656-67839161	fixed_Pab-Ppy	1505		2	0	2	2	0	0	2	2	2	2	2	2	1	2	2	2	2	0	2	1	1	2	1	0	2	2	2	0	2	0	2	0	2	2	2	1	2	1	1	2	1	2	2	2	1	2
chr17:68409275-68413824	fixed_Pab-Ppy	4549	SLC39A11	2	0	2	2	0	0	2	2	2	2	2	2	2	2	2	1	2	0	2	2	2	2	2	0	2	2	2	0	2	0	1	0	2	2	2	2	2	2	2	2	2	2	2	2	2	2
chr17:69825140-69828771	fixed_Gbeg-Ggod-Ggog	3631		1	2	0	0	2	2	0	1	0	2	1	0	0	1	0	0	0	2	2	0	0	2	0	2	2	1	0	2	2	2	0	2	0	0	2	0	2	0	0	0	0	0	2	2	1	2
chr17:72557864-72564168	fixed_Ppa-Ptre-Ptrs-Ptrt-Ptrv	6304		0	2	2	2	2	2	2	0	2	0	0	2	2	2	2	2	2	1	0	1	2	0	2	2	0	0	2	2	0	2	2	2	2	2	0	2	0	2	2	2	2	2	0	2	0	0
chr17:76309522-76310114	fixed_Ppa-Ptre-Ptrs-Ptrt-Ptrv	592	RPTOR	0	2	2	3	3	1	2	0	2	0	0	2	2	2	2	3	2	3	0	1	2	0	2	2	0	0	2	3	0	2	2	2	2	2	0	1	0	2	2	2	2	3	0	3	0	0
chr17:78146372-78148126	fixed_Pab-Ppy	1754	FOXK2	2	0	2	2	0	0	2	2	2	3	2	2	2	2	2	2	3	0	2	2	2	3	2	0	2	2	2	0	2	0	2	0	2	2	2	2	2	2	2	2	2	2	3	2	2	2
chr17:78498737-78500729	fixed_Ppa-Ptre-Ptrs-Ptrt-Ptrv	1992	B3GNTL1	0	2	2	2	1	1	2	0	3	0	0	2	2	2	2	2	2	2	0	2	2	0	2	2	0	0	2	1	0	2	1	2	2	2	0	1	0	2	2	2	2	2	0	2	0	0
chr17:78574666-78575869	fixed_Gbeg-Ggod-Ggog	1203	B3GNTL1	2	1	0	0	1	1	0	2	0	2	2	0	0	2	0	0	0	2	2	0	0	2	0	1	3	2	0	1	2	1	0	1	0	0	2	0	2	0	0	0	0	0	2	2	2	2
chr18:123226-137205	fixed_Hde	13979		1	2	2	1	2	1	1	1	1	1	1	1	1	2	2	1	1	1	1	1	1	1	1	2	2	1	1	2	2	2	1	2	1	1	1	2	1	2	2	1	1	1	2	2	1	1
chr18:1705628-1708173	fixed_Ptre-Ptrs-Ptrt-Ptrv	2545		0	1	2	2	1	2	2	2	2	0	1	1	2	2	2	2	1	1	2	2	2	0	2	2	0	0	2	2	0	2	2	2	2	2	2	2	0	2	2	2	2	1	2	2	2	2
chr18:2452369-2458118	fixed_Pab-Ppy	5749		2	0	2	2	0	0	2	2	2	2	2	2	2	2	2	2	2	0	2	2	2	2	2	0	2	2	2	0	2	0	2	0	2	2	2	2	2	2	2	2	2	2	2	2	2	2
chr18:3625768-3629002	fixed_Gbeg-Ggod-Ggog	3234	DLGAP1	2	2	0	0	2	2	0	2	0	2	2	0	0	2	0	0	0	2	2	0	0	2	0	2	2	2	0	2	2	2	0	2	0	0	2	0	2	0	0	0	0	0	2	2	2	2
chr18:4393168-4397535	fixed_Hde	4367	DLGAP1	2	2	2	2	2	2	2	2	2	2	2	2	2	2	2	2	2	2	2	2	2	2	2	2	2	2	2	2	2	2	2	2	2	2	2	2	2	2	2	2	2	2	2	2	2	2
chr18:4596562-4597176	fixed_Pab-Ppy	614		2	0	2	2	0	0	2	2	2	2	1	2	2	2	2	2	2	0	2	2	2	2	2	0	2	2	2	0	2	0	2	0	2	2	2	2	2	2	1	2	2	2	2	2	2	2
chr18:4890448-4891066	fixed_Ppa-Ptre-Ptrs-Ptrt-Ptrv	618		0	2	2	2	2	1	2	0	2	0	0	2	2	2	2	2	2	2	0	2	2	0	2	2	0	0	2	2	0	2	2	2	2	2	0	2	0	2	2	2	2	2	0	2	0	0
chr18:6044012-6045310	fixed_Ppy	1298	L3MBTL4	2	1	2	2	0	1	2	2	2	2	1	2	2	2	2	2	2	0	2	2	2	2	2	0	2	2	2	0	1	0	2	1	2	2	2	2	2	2	2	2	2	2	1	2	2	2
chr18:7054533-7056664	fixed_Pab-Ppy	2131	LAMA1	2	0	2	2	0	0	3	2	2	2	2	2	2	2	2	2	2	0	2	2	2	2	2	0	2	2	2	0	2	0	2	0	2	2	2	2	2	2	2	2	2	2	2	2	2	2
chr18:8855962-8857731	fixed_Pab-Ppy	1769		2	0	2	3	0	0	2	3	2	2	2	2	2	2	2	3	3	0	2	3	2	2	3	0	2	2	2	0	2	0	2	0	2	2	2	2	2	2	2	2	2	2	3	2	2	2
chr18:9548283-9549009	fixed_Gbeg-Ggod-Ggog	726	PPP4R1	2	2	0	0	1	2	0	2	0	2	2	0	0	2	0	0	0	2	2	0	0	2	0	2	2	2	0	1	2	2	0	2	0	0	2	0	2	0	0	0	0	0	2	3	2	2
chr18:10578014-10583128	fixed_Pab-Ppy	5114		2	0	2	2	0	0	2	1	2	2	1	1	1	1	2	2	1	0	2	1	1	2	2	0	1	2	2	0	2	0	2	0	2	2	1	2	2	2	2	2	2	2	1	2	1	2
chr18:12614915-12615507	fixed_Pab-Ppy	592	SPIRE1	2	0	2	2	0	0	2	2	2	2	2	2	2	2	2	2	2	0	2	1	2	2	2	0	2	2	3	0	2	0	2	0	2	2	2	2	2	2	2	2	2	2	2	2	2	2
chr18:13131327-13132836	fixed_Gbeg-Ggod-Ggog	1509		2	2	0	0	1	2	0	2	0	2	1	0	0	2	0	0	0	2	2	0	0	2	0	2	2	2	0	2	3	2	0	2	0	0	2	0	2	0	0	0	0	0	2	2	3	2
chr18:14420232-14429250	fixed_Pab-Ppy	9018		6	0	12	15	0	0	13	6	12	6	5	14	12	11	12	12	14	0	6	12	11	5	9	0	5	6	15	0	6	0	15	0	13	14	5	14	5	13	10	13	14	13	6	8	5	6
chr18:14773132-14808255	fixed_Pab-Ppy	35123	ANKRD30B	6	0	15	14	0	0	15	4	14	7	5	15	13	8	13	10	17	0	4	13	13	6	13	0	6	6	16	0	7	0	13	0	12	14	4	15	7	16	10	18	15	14	4	8	4	3
chr18:14887849-14918911	fixed_Ppa	31062		2	1	1	1	1	1	1	0	1	2	2	1	1	2	1	1	1	2	0	2	1	2	1	1	2	2	1	1	2	1	1	2	1	1	0	1	2	1	1	1	1	1	0	2	0	0
chr18:14918911-14921770	fixed_Ppa-Ptre-Ptrs-Ptrt-Ptrv	2859		0	1	1	1	1	2	1	0	1	0	0	2	1	2	1	1	1	2	0	1	1	0	1	1	0	0	2	2	0	2	1	2	1	1	0	1	0	1	1	2	1	1	0	2	0	0
chr18:14921770-14925355	Gbeg-Ggod-Ggog-Ppa-Ptre-Ptrs-Ptrt-Ptrv	3585		0	1	0	0	2	1	0	0	0	0	0	0	0	2	0	0	0	1	0	0	0	0	0	1	0	0	0	1	0	1	0	1	0	0	0	0	0	0	0	0	0	0	0	2	0	0
chr18:14938299-14967955	fixed_Ppa-Ptre-Ptrs-Ptrt-Ptrv	29656		0	2	1	1	2	2	1	0	1	0	0	1	1	3	1	1	1	2	0	1	1	0	1	2	0	0	1	2	0	2	1	2	1	1	0	1	0	1	1	1	1	1	0	3	0	0
chr18:17381593-17384473	fixed_Pab-Ppy	2880	ESCO1	2	0	2	2	0	0	2	2	2	2	2	2	2	2	2	2	2	0	2	2	2	2	2	0	1	2	2	0	2	0	2	0	2	2	2	2	2	2	2	2	2	2	2	3	2	2
chr18:19330466-19334676	fixed_Pab	4210		2	0	2	2	2	0	2	2	2	2	2	2	2	2	2	2	2	2	2	2	2	2	2	2	2	2	2	2	2	2	2	0	2	2	2	2	2	2	2	2	2	2	2	2	2	2
chr18:20467585-20469338	fixed_Pab-Ppy	1753	LOC729950	2	0	2	2	0	0	1	2	2	2	1	2	2	2	1	2	1	0	2	2	1	1	2	0	2	1	2	0	2	0	2	0	1	2	2	2	2	2	1	2	1	1	2	2	2	2
chr18:22732682-22735854	fixed_Pab-Ppy	3172	CHST9-AS1	2	0	2	2	0	0	2	2	2	2	2	2	2	2	2	2	2	0	2	2	2	2	2	0	2	2	2	0	2	0	2	0	2	3	2	3	2	2	2	2	2	2	2	2	2	2
chr18:23248781-23249571	fixed_Pab-Ppy	790		2	0	2	1	0	0	2	2	1	2	1	2	1	1	2	2	1	0	2	2	1	1	2	0	2	2	2	0	1	0	2	0	1	2	2	2	3	2	1	1	2	2	2	2	2	2
chr18:24432155-24437179	fixed_Pab-Ppy	5024		2	0	2	2	0	0	2	2	2	2	2	2	2	2	2	2	2	0	2	2	2	2	2	0	2	2	2	0	2	0	2	0	2	2	2	2	2	2	2	2	2	2	2	2	2	2
chr18:24872280-24874685	fixed_Pab-Ppy	2405		2	0	1	2	0	0	2	2	2	2	2	2	1	2	2	1	2	0	2	2	2	2	2	0	2	2	1	0	2	0	2	0	2	2	2	2	2	2	2	1	1	2	2	2	2	2
chr18:25519923-25529227	fixed_Ppa-Ptre-Ptrs-Ptrt-Ptrv	9304		0	2	2	2	2	2	2	0	2	0	0	2	2	2	2	2	2	1	0	2	2	0	2	2	0	0	2	2	0	2	2	2	2	2	0	2	0	2	2	2	2	2	0	2	0	0
chr18:26943018-26951555	fixed_Gbeg-Ggod-Ggog	8537		2	2	0	0	2	2	0	2	0	1	2	0	0	2	0	0	0	1	2	0	0	2	0	2	2	2	0	2	2	2	0	1	0	0	2	0	2	0	0	0	0	0	2	2	2	2
chr18:28368375-28372731	fixed_Gbeg-Ggod-Ggog	4356		2	2	0	0	2	2	0	2	0	2	2	0	0	2	0	0	0	2	2	0	0	2	0	2	2	2	0	2	2	2	0	2	0	0	2	0	2	0	0	0	0	0	2	2	2	2
chr18:29209653-29223218	fixed_Gbeg-Ggod-Ggog	13565	C18orf34	2	2	0	0	2	2	0	2	0	2	2	0	0	2	0	0	0	2	2	0	0	2	0	2	2	2	0	2	2	2	0	2	0	0	2	0	2	0	0	0	0	0	3	2	2	2
chr18:32329669-32333570	fixed_Hde	3901	FHOD3	2	2	2	2	2	2	2	2	2	2	2	2	2	2	2	2	2	2	2	2	2	2	3	2	2	2	2	2	2	3	2	2	3	2	2	2	2	2	2	2	2	2	2	2	2	2
chr18:32616749-32618858	fixed_Gbeg-Ggod-Ggog	2109		2	2	0	0	2	2	0	2	0	2	1	0	0	2	0	0	0	2	2	0	0	2	0	2	2	2	0	2	2	2	0	2	0	0	2	0	2	0	0	0	0	0	2	2	2	2
chr18:35295125-35297055	fixed_Gbeg-Ggod-Ggog	1930	LOC647946	2	2	0	0	2	2	0	2	0	2	1	0	0	1	0	0	0	1	2	0	0	1	0	2	1	1	0	2	1	2	0	2	0	0	2	0	1	0	0	0	0	0	2	1	2	2
chr18:35775225-35780670	fixed_Pab-Ppy	5445		2	0	2	2	0	0	2	2	2	2	1	2	2	2	2	2	2	0	2	2	2	2	2	0	1	2	2	0	2	0	2	0	2	2	2	2	2	2	2	2	2	2	2	2	2	2
chr18:35816454-35823046	fixed_Pab-Ppy	6592		2	0	2	2	0	0	2	2	2	2	2	2	2	2	2	2	2	0	2	2	2	2	2	0	2	2	2	0	2	0	2	0	2	2	2	2	2	2	2	2	2	2	2	2	2	2
chr18:37774217-37775417	fixed_Ppa	1200		2	2	2	2	1	2	2	0	2	2	2	2	2	2	2	2	2	2	0	3	2	2	2	2	2	2	2	2	2	2	3	1	2	2	0	2	2	2	2	2	2	1	0	2	0	0
chr18:39144798-39155095	fixed_Gbeg-Ggod-Ggog	10297		2	2	0	0	2	2	0	2	0	2	1	0	0	2	0	0	0	2	2	0	0	2	0	2	2	2	0	2	1	2	0	2	0	0	2	0	2	0	0	0	0	0	2	2	2	2
chr18:39499622-39507500	fixed_Ppa	7878		2	2	2	2	2	2	2	0	2	2	2	2	2	2	2	2	2	2	0	2	2	2	2	2	2	2	2	2	2	2	2	2	2	2	0	2	2	2	2	2	2	2	0	2	0	0
chr18:39523013-39526743	fixed_Gbeg-Ggod-Ggog	3730		2	2	0	0	2	2	0	2	0	2	2	0	0	1	0	0	0	2	2	0	0	2	0	1	2	2	0	2	2	2	0	2	0	0	2	0	1	0	0	0	0	0	2	2	2	2
chr18:43398725-43406262	fixed_Pab-Ppy	7537		2	0	2	2	0	0	3	2	2	2	2	2	2	2	2	2	2	0	2	2	2	2	2	0	2	2	2	0	2	0	2	0	2	2	2	2	2	2	2	2	2	2	2	2	2	2
chr18:43655991-43665051	fixed_Gbeg-Ggod-Ggog	9060	SMAD2	2	2	0	0	2	2	0	2	0	2	2	0	0	2	0	0	0	2	2	0	0	2	0	2	1	2	0	2	2	2	0	2	0	0	2	0	2	0	0	0	0	0	2	2	2	2
chr18:45024417-45026693	fixed_Pab-Ppy	2276	DYM	2	0	2	2	0	0	2	2	2	2	1	2	2	2	2	1	2	0	2	2	2	2	2	0	2	2	2	0	2	0	2	0	2	2	2	2	1	2	2	2	2	2	2	2	2	2
chr18:45540199-45545441	fixed_Pab-Ppy	5242		2	0	2	3	0	0	3	2	2	2	2	3	3	2	2	2	2	0	2	3	3	2	3	0	2	2	2	0	2	0	2	0	2	2	2	3	2	3	2	2	2	2	2	2	2	2
chr18:46612071-46613392	fixed_Ppa-Ptre-Ptrs-Ptrt-Ptrv	1321		0	2	2	2	2	1	2	0	2	0	0	2	2	2	2	2	2	2	0	2	2	0	2	2	0	0	2	2	0	2	2	2	2	2	0	2	0	2	2	2	2	2	0	2	0	0
chr18:46981710-46982210	fixed_Ppa-Ptre-Ptrs-Ptrt-Ptrv	500		0	2	2	2	2	2	2	0	2	0	0	2	2	2	2	2	2	2	0	2	2	0	2	2	0	0	2	2	0	2	2	2	2	2	0	2	0	2	2	2	2	2	0	2	0	0
chr18:47720545-47721521	fixed_Ppy	976		2	2	2	2	0	2	3	2	2	2	1	2	2	2	2	2	2	0	2	2	2	2	2	0	2	2	2	0	2	0	2	2	2	2	2	3	1	2	2	2	2	2	2	2	2	2
chr18:49454787-49462348	fixed_Hde	7561		2	2	2	2	2	2	2	2	2	2	1	2	2	2	2	2	2	2	2	2	2	2	2	2	2	2	2	2	2	2	2	2	2	2	2	2	2	2	2	2	2	2	2	2	2	2
chr18:50599776-50602456	fixed_Ppa-Ptre-Ptrs-Ptrt-Ptrv	2680		0	2	2	2	2	2	2	0	2	0	0	2	2	2	2	2	2	2	0	2	2	0	2	2	0	0	2	2	0	2	2	2	2	2	0	2	0	2	2	2	2	2	0	2	0	0
chr18:55397348-55401815	fixed_Pab-Ppy	4467	CCBE1	2	0	2	2	0	0	2	2	2	2	2	2	2	2	2	2	2	0	2	2	2	2	2	0	2	2	2	0	2	0	2	0	2	2	2	2	2	2	2	2	2	2	2	2	2	2
chr18:55759310-55761012	fixed_Ppa-Ptre-Ptrs-Ptrt-Ptrv	1702		0	2	2	2	2	2	2	0	2	0	0	2	2	2	2	1	2	2	0	2	2	0	1	2	0	0	1	2	0	1	2	1	2	2	0	2	0	2	2	2	2	2	0	2	0	0
chr18:55899813-55900864	fixed_Ppa-Ptre-Ptrs-Ptrt-Ptrv	1051		0	2	2	2	2	2	2	0	2	0	0	2	2	2	2	1	2	2	0	2	2	0	2	2	0	0	1	2	0	2	2	2	2	2	0	2	0	2	2	2	2	2	0	2	0	0
chr18:56097702-56103644	fixed_Hde	5942		2	2	2	2	2	2	2	2	2	2	2	2	2	2	2	2	2	2	2	2	2	2	2	2	3	2	2	2	2	2	2	2	2	2	2	2	2	2	2	2	2	2	2	2	2	2
chr18:56455838-56457929	fixed_Pab-Ppy	2091		1	0	1	1	0	0	1	1	1	1	1	1	1	1	1	1	1	0	1	2	1	1	1	0	1	1	1	0	1	0	2	0	1	1	1	1	1	1	1	1	1	1	1	2	1	1
chr18:56584898-56585398	fixed_Ppa-Ptre-Ptrs-Ptrt-Ptrv	500		0	1	2	2	1	1	2	0	2	0	0	1	2	2	2	2	2	1	0	2	2	0	2	1	0	0	2	1	0	1	2	1	1	1	0	2	0	2	1	2	2	2	0	2	0	0
chr18:56842927-56845828	fixed_Ppa	2901		2	2	2	2	2	2	2	0	2	2	2	2	2	2	2	2	2	3	0	2	2	2	2	2	2	2	2	2	2	2	2	2	2	2	0	2	2	2	2	2	2	2	0	2	0	0
chr18:58714180-58719399	fixed_Ppa-Ptre-Ptrs-Ptrt-Ptrv	5219	PHLPP1	0	2	2	2	2	2	2	0	2	0	0	2	2	2	2	2	2	2	0	2	2	0	2	2	0	0	2	2	0	2	2	2	2	2	0	2	0	2	2	2	2	2	0	2	0	0
chr18:58951923-58953357	fixed_Gbeg-Ggod-Ggog	1434	BCL2	2	2	0	0	2	1	0	1	0	1	1	0	0	1	0	0	0	2	1	0	0	2	0	2	1	2	0	2	1	2	0	2	0	0	1	0	2	0	0	0	0	0	1	2	1	1
chr18:60878127-60879184	fixed_Pab-Ppy	1057		2	0	2	2	0	0	2	2	2	2	1	2	2	2	2	2	2	0	2	2	2	2	2	0	2	2	2	0	2	0	2	0	2	2	2	2	2	2	2	2	2	2	2	2	2	2
chr18:61045850-61048869	fixed_Ppa-Ptre-Ptrs-Ptrt-Ptrv	3019		0	2	2	2	2	2	2	0	2	0	0	2	2	2	2	2	2	2	0	2	2	0	2	2	0	0	2	2	0	2	2	2	2	2	0	2	0	2	2	2	2	2	0	2	0	0
chr18:61334158-61339044	fixed_Pab-Ppy	4886		2	0	2	2	0	0	2	2	2	2	1	2	2	2	2	2	2	0	2	2	2	2	2	0	2	2	2	0	2	0	2	0	2	2	2	2	2	2	2	2	2	2	2	2	2	2
chr18:61833046-61838799	fixed_Ppa-Ptre-Ptrs-Ptrt-Ptrv	5753		0	1	2	2	1	1	2	0	2	0	0	2	1	2	2	2	2	2	0	2	2	0	2	1	0	0	2	1	0	1	2	2	2	2	0	2	0	2	2	2	2	2	0	2	0	0
chr18:61885400-61888618	fixed_Gbeg-Ggod-Ggog	3218		2	2	0	0	2	2	0	2	0	2	1	0	0	2	0	0	0	1	2	0	0	2	0	2	2	2	0	2	2	2	0	2	0	0	2	0	2	0	0	0	0	0	2	2	2	2
chr18:61933169-61937613	fixed_Pab-Ppy	4444		2	0	2	2	0	0	2	2	2	2	2	2	2	2	2	2	2	0	2	2	2	2	2	0	2	2	2	0	2	0	2	0	2	2	2	3	1	2	2	2	2	2	2	2	2	2
chr18:62691678-62692279	fixed_Pab-Ppy	601		2	0	2	2	0	0	2	2	2	2	2	2	2	2	2	2	2	0	2	3	2	2	2	0	2	2	2	0	2	0	2	0	2	2	2	2	2	2	3	2	2	2	2	2	2	2
chr18:62883273-62883879	fixed_Pab-Ppy	606		2	0	2	2	0	0	2	2	2	2	2	3	2	2	2	2	2	0	2	2	2	2	2	0	2	2	2	0	1	0	2	0	2	3	2	2	2	2	2	2	2	1	2	2	2	2
chr18:63001942-63010884	fixed_Gbeg-Ggod-Ggog	8942		2	2	0	0	2	2	0	2	0	2	2	0	0	1	0	0	0	1	2	0	0	2	0	2	2	2	0	2	2	2	0	2	0	0	2	0	2	0	0	0	0	0	2	2	2	2
chr18:63113938-63119459	fixed_Ptre-Ptrs-Ptrt-Ptrv	5521		0	2	2	2	2	2	2	2	2	0	0	2	2	1	2	1	2	1	2	2	2	0	2	1	0	0	2	2	0	2	2	2	2	2	2	2	0	2	2	2	1	2	2	2	2	2
chr18:63185706-63193610	fixed_Pab-Ppy	7904		2	0	2	2	0	0	2	2	2	2	2	2	2	2	2	2	2	0	2	2	2	2	2	0	2	2	2	0	2	0	2	0	2	2	2	2	2	2	2	2	2	2	2	2	2	2
chr18:63510530-63514266	fixed_Ptre-Ptrs-Ptrt-Ptrv	3736	LOC643542	0	2	2	2	2	2	2	2	2	0	0	2	2	2	2	2	2	2	2	2	2	0	2	2	0	0	2	2	0	2	2	2	2	2	2	2	0	2	1	2	2	2	2	2	2	2
chr18:63799489-63804776	fixed_Ptre-Ptrs-Ptrt-Ptrv	5287		0	2	2	2	2	2	2	2	2	0	0	2	2	2	2	2	2	1	2	2	2	0	2	1	0	0	2	2	0	2	2	2	2	2	2	2	0	2	2	2	2	2	2	2	2	2
chr18:63806529-63808400	fixed_Gbeg-Ggod-Ggog	1871		2	1	0	0	1	1	0	2	0	2	2	0	0	2	0	0	0	1	2	0	0	2	0	1	2	2	0	1	2	1	0	2	0	0	2	0	2	0	0	0	0	0	2	2	2	2
chr18:63973743-63978603	fixed_Gbeg-Ggod-Ggog	4860		2	2	0	0	2	2	0	2	0	2	1	0	0	2	0	0	0	2	2	0	0	2	0	1	2	2	0	2	2	2	0	2	0	0	2	0	2	0	0	0	0	0	2	2	2	2
chr18:64334706-64335556	fixed_Pab-Ppy	850		2	0	2	2	0	0	2	2	2	2	2	3	2	2	2	2	2	0	2	2	2	2	2	0	2	2	2	0	2	0	2	0	2	2	2	2	2	2	2	2	2	2	2	2	2	2
chr18:64695838-64700856	fixed_Ppa	5018	CCDC102B	2	2	2	2	2	2	2	0	2	2	2	2	2	2	2	2	2	2	0	2	2	2	2	2	2	2	2	2	3	2	2	2	2	2	0	2	2	2	2	2	2	2	0	2	0	0
chr18:64964590-64965556	fixed_Gbeg-Ggod-Ggog	966		2	2	0	0	2	2	0	2	0	2	2	0	0	2	0	0	0	1	2	0	0	3	0	2	2	2	0	1	2	2	0	2	0	0	2	0	2	0	0	0	0	0	2	3	2	2
chr18:65149168-65162100	fixed_Pab-Ppy	12932		2	0	2	2	0	0	2	2	2	2	2	2	2	2	2	1	2	0	2	2	2	2	2	0	2	2	2	0	2	0	2	0	2	2	2	2	2	2	2	2	2	2	2	2	2	2
chr18:65361558-65366866	fixed_Gbeg-Ggod-Ggog	5308	DOK6	2	2	0	0	2	2	0	2	0	2	2	0	0	2	0	0	0	2	2	0	0	2	0	2	2	2	0	2	2	2	0	2	0	0	2	0	2	0	0	0	0	0	2	1	2	2
chr18:65442914-65445576	fixed_Ppa-Ptre-Ptrs-Ptrt-Ptrv	2662	DOK6	0	2	2	2	2	2	2	0	2	0	0	2	2	2	2	2	2	2	0	2	2	0	2	2	0	0	2	2	0	2	3	2	2	2	0	2	0	2	2	2	2	2	0	2	0	0
chr18:65785612-65797805	fixed_Gbeg-Ggod-Ggog	12193		2	2	0	0	2	2	0	2	0	2	2	0	0	2	0	0	0	2	2	0	0	2	0	2	2	2	0	2	2	2	0	2	0	0	2	0	2	0	0	0	0	0	2	2	2	2
chr18:67427901-67429401	fixed_Pab-Ppy	1500		2	0	2	1	0	0	2	2	2	2	2	2	2	2	2	2	2	0	2	2	2	2	2	0	2	2	2	0	2	0	2	0	2	2	2	2	2	2	2	2	2	2	2	2	2	2
chr18:67567666-67568830	fixed_Pab-Ppy	1164		2	0	2	2	0	0	2	2	2	2	2	2	2	2	2	1	2	0	2	2	2	2	2	0	2	2	2	0	2	0	2	0	2	2	2	2	2	2	2	2	2	2	2	2	2	2
chr18:67585858-67599930	fixed_Pab-Ppy	14072		2	0	2	2	0	0	2	2	2	2	1	2	2	2	2	2	2	0	2	2	2	2	2	0	2	2	1	0	2	0	2	0	2	2	2	2	2	2	2	2	2	2	2	2	2	2
chr18:67821031-67824741	fixed_Ppa-Ptre-Ptrs-Ptrt-Ptrv	3710		0	1	2	2	1	1	3	0	2	0	0	2	2	2	2	2	2	1	0	2	2	0	2	1	0	0	2	1	0	1	2	1	2	2	0	3	0	2	2	2	2	2	0	2	0	0
chr18:68470295-68475019	fixed_Pab-Ppy	4724		2	0	2	2	0	0	2	2	2	2	2	2	2	2	2	2	2	0	2	2	2	2	2	0	2	2	2	0	2	0	2	0	2	2	2	2	2	2	2	2	2	2	2	2	2	2
chr18:69482281-69487756	fixed_Gbeg-Ggod-Ggog	5475		2	2	0	0	2	2	0	2	0	2	1	0	0	2	0	0	0	3	2	0	0	2	0	2	1	2	0	2	2	2	0	2	0	0	2	0	2	0	0	0	0	0	2	2	2	2
chr18:70210019-70212869	fixed_Pab-Ppy	2850		2	0	2	2	0	0	2	2	2	1	2	2	1	2	2	2	2	0	2	1	1	2	1	0	2	2	2	0	2	0	2	0	2	1	2	2	2	2	2	2	2	2	1	2	2	2
chr18:73216883-73218663	fixed_Gbeg-Ggod-Ggog	1780		2	2	0	0	1	1	0	2	0	2	1	0	0	2	0	0	0	1	2	0	0	1	0	1	2	1	0	1	1	1	0	1	0	0	1	0	2	0	0	0	0	0	1	2	2	2
chr18:73335779-73338765	fixed_Pab-Ppy	2986		2	0	2	2	0	0	2	2	2	2	2	2	2	2	2	2	2	0	2	2	2	2	2	0	2	2	2	0	2	0	2	0	2	2	2	2	2	2	2	2	2	2	2	2	2	2
chr18:73531135-73543800	Gbeg-Ggod-Ggog-Ppa-Ptre-Ptrs-Ptrt-Ptrv	12665		0	2	0	0	2	2	0	0	0	0	0	0	0	2	0	0	0	2	0	0	0	0	0	2	0	0	0	2	0	2	0	2	0	0	0	0	0	0	0	0	0	0	0	2	0	0
chr18:73712101-73715419	fixed_Gbeg-Ggod-Ggog	3318		2	2	0	0	2	2	0	2	0	2	2	0	0	2	0	0	0	1	2	0	0	2	0	2	2	2	0	2	2	1	0	2	0	0	2	0	2	0	0	0	0	0	2	2	2	2
chr18:74507000-74511980	fixed_Gbeg-Ggod-Ggog	4980		2	1	0	0	2	1	0	2	0	2	2	0	0	2	0	0	0	1	2	0	0	2	0	1	2	2	0	1	2	2	0	2	0	0	2	0	2	0	0	0	0	0	2	2	2	1
chr18:74723767-74726055	fixed_Pab-Ppy	2288		2	0	2	2	0	0	2	2	1	2	2	2	2	2	2	1	1	0	2	1	2	2	2	0	2	2	2	0	4	0	2	0	2	2	2	2	3	2	2	2	2	1	2	2	2	2
chr18:74880146-74893882	fixed_Gbeg-Ggod-Ggog	13736		2	2	0	0	2	2	0	2	0	2	2	0	0	2	0	0	0	2	2	0	0	2	0	2	2	2	0	2	2	2	0	2	0	0	2	0	2	0	0	0	0	0	2	2	2	2
chr18:75546212-75546712	fixed_Pab-Ppy	500	CTDP1	2	0	2	1	0	0	1	2	2	2	1	2	2	2	2	1	2	0	2	1	2	2	1	0	1	2	2	0	2	0	1	0	2	1	2	2	2	2	2	2	1	2	2	2	2	2
chr18:76111348-76112036	fixed_Pab-Ppy	688		2	0	2	3	0	0	1	2	3	2	2	2	2	2	2	2	3	0	3	2	2	3	2	0	2	2	3	0	2	0	2	0	2	3	2	1	2	3	2	3	2	2	3	3	3	3
chr19:97274-104375	fixed_Pab-Ppy	7101		9	0	5	6	0	0	6	15	6	8	9	6	6	16	6	5	5	0	15	5	5	9	7	0	9	8	5	0	7	0	6	0	5	4	15	4	11	7	4	4	5	4	18	14	15	19
chr19:104375-119899	Gbeg-Ggod-Ggog-Pab-Ppy	15524		9	0	0	0	0	0	0	15	0	8	8	0	0	16	0	0	0	0	14	0	0	9	0	0	8	8	0	0	7	0	0	0	0	0	14	0	9	0	0	0	0	0	14	14	15	17
chr19:2836941-2842388	fixed_Pab-Ppy	5447		2	0	2	2	0	0	1	2	2	2	2	2	2	2	2	2	2	0	2	1	2	2	1	0	2	2	2	0	2	0	1	0	2	2	2	1	2	2	2	2	2	2	2	2	2	2
chr19:4386715-4388205	fixed_Ppa-Ptre-Ptrs-Ptrt-Ptrv	1490	CHAF1A	0	2	3	3	3	2	2	0	2	0	0	2	3	2	2	3	2	2	0	2	2	0	3	2	0	0	3	3	0	3	2	2	2	3	0	2	0	3	2	3	2	3	0	2	0	0
chr19:8671862-8708321	fixed_Gbeg-Ggod-Ggog	36459	OR2Z1	2	2	0	0	2	2	0	2	0	2	2	0	0	2	0	0	0	2	2	0	0	2	0	2	2	2	0	2	2	2	0	2	0	0	2	0	2	0	0	0	0	0	2	2	2	2
chr19:9007080-9009820	fixed_Gbeg	2740		2	2	2	2	2	2	2	2	2	2	2	2	2	2	3	3	2	2	2	2	2	2	0	2	2	2	2	2	2	2	1	2	2	2	2	2	2	2	2	2	2	2	2	3	2	2
chr19:9057782-9073965	Gbeg-Ggod-Ggog-Ppa-Ptre-Ptrs-Ptrt-Ptrv	16183	OR1M1,OR7G2	0	2	0	0	2	2	0	0	0	0	0	0	0	2	0	0	0	2	0	0	0	0	0	2	0	0	0	2	0	2	0	2	0	0	0	0	0	0	0	0	0	0	0	2	0	0
chr19:9078530-9080749	Gbeg-Ggod-Ggog-Ppa-Ptre-Ptrs-Ptrt-Ptrv	2219		0	2	0	0	2	2	0	0	0	0	0	0	0	2	0	0	0	2	0	0	0	0	0	2	0	0	0	2	0	2	0	2	0	0	0	0	0	0	0	0	0	0	0	2	0	0
chr19:9103892-9110983	fixed_Pab-Ppy	7091		2	0	2	2	0	0	2	2	2	2	2	2	2	2	2	2	2	0	2	2	2	2	2	0	2	2	2	0	2	0	2	0	2	2	2	2	2	2	2	2	2	2	2	2	2	2
chr19:9220653-9221257	fixed_Ppa-Ptre-Ptrs-Ptrt-Ptrv	604		0	2	2	2	1	2	2	0	2	0	0	2	2	2	3	2	2	2	0	2	2	0	2	2	0	0	3	2	0	2	2	2	2	2	0	2	0	2	2	2	2	3	0	2	0	0
chr19:12503011-12518019	fixed_Pab-Ppy	15008	ZNF564	2	0	2	2	0	0	2	2	2	2	2	2	2	2	2	2	2	0	2	1	2	2	2	0	2	2	3	0	2	0	2	0	2	2	2	2	2	2	2	2	2	2	2	2	2	2
chr19:15765752-15791984	fixed_Ppa-Ptre-Ptrs-Ptrt-Ptrv	26232	OR10H5,OR10H1	0	2	2	2	2	2	2	0	2	0	0	2	2	2	2	2	2	2	0	2	2	0	2	2	0	0	2	2	0	2	2	2	2	2	0	2	0	2	2	2	2	2	0	2	0	0
chr19:22862971-22879579	fixed_Gbeg-Ggod-Ggog	16608		2	1	0	0	2	1	0	2	0	2	2	0	0	2	0	0	0	2	2	0	0	2	0	2	2	2	0	2	2	1	0	1	0	0	2	0	2	0	0	0	0	0	2	2	2	2
chr19:33260127-33269864	fixed_Pab-Ppy	9737		2	0	2	2	0	0	2	2	2	2	1	2	2	2	2	2	2	0	2	2	2	2	2	0	1	2	1	0	2	0	2	0	2	2	2	1	2	2	2	1	2	2	2	2	2	2
chr19:33396295-33398805	fixed_Ppa-Ptre-Ptrs-Ptrt-Ptrv	2510		0	1	2	2	1	1	2	0	2	0	0	2	2	2	2	2	2	1	0	2	2	0	2	2	0	0	2	2	0	1	2	1	2	2	0	2	0	2	2	2	2	2	0	2	0	0
chr19:35991228-35991728	fixed_Ppa-Ptre-Ptrs-Ptrt-Ptrv	500		0	2	2	2	1	2	2	0	2	0	0	2	2	2	2	2	2	2	0	2	2	0	2	2	0	0	2	2	0	2	2	2	2	2	0	2	0	2	2	2	2	2	0	2	0	0
chr19:39140820-39155428	fixed_Ppa-Ptre-Ptrs-Ptrt-Ptrv	14608		0	2	2	2	2	2	2	0	2	0	0	2	2	2	2	2	2	2	0	2	2	0	2	2	0	0	2	2	0	2	2	2	2	2	0	2	0	2	2	2	2	2	0	2	0	0
chr19:40279425-40282639	fixed_Pab-Ppy	3214	LOC100128675	2	0	2	3	0	0	1	2	2	2	2	2	2	2	2	3	3	0	1	1	3	2	2	0	2	2	2	0	2	0	2	0	3	3	2	2	2	2	3	2	2	2	2	2	2	2
chr19:40767123-40779840	fixed_Ppa-Ptre-Ptrs-Ptrt-Ptrv	12717		0	2	2	2	2	2	2	0	2	0	0	2	2	2	2	2	2	2	0	2	2	0	2	2	0	0	2	2	0	2	2	2	2	2	0	2	0	2	2	2	2	2	0	2	0	0
chr19:43111767-43114577	fixed_Ppa-Ptre-Ptrs-Ptrt-Ptrv	2810	SIPA1L3	0	1	2	2	1	1	1	0	1	0	0	2	2	2	2	2	2	2	0	1	1	0	2	1	0	0	2	2	0	1	1	1	2	1	0	1	0	2	1	2	2	2	0	2	0	0
chr19:44698761-44714855	fixed_Gbeg-Ggod-Ggog	16094	SELV,EID2B	2	2	0	0	2	2	0	2	0	2	1	0	0	2	0	0	0	2	2	0	0	2	0	2	2	2	0	2	2	2	0	2	0	0	1	0	2	0	0	0	0	0	2	2	1	2
chr19:44860729-44869412	fixed_Ppa-Ptre-Ptrs-Ptrt-Ptrv	8683	LGALS17A	0	5	2	2	5	6	2	0	3	0	0	2	2	2	2	2	2	4	0	2	2	0	2	5	0	0	3	5	0	5	2	6	2	2	0	2	0	3	2	2	2	2	0	3	0	0
chr19:44912215-44920622	Gbeg-Ggod-Ggog-Ppa-Ptre-Ptrs-Ptrt-Ptrv	8407	CLC	0	2	0	0	2	2	0	0	0	0	0	0	0	2	0	0	0	2	0	0	0	0	0	2	0	0	0	2	0	2	0	2	0	0	0	0	0	0	0	0	0	0	0	3	0	0
chr19:44920622-44922205	fixed_Gbeg-Ggod-Ggog	1583		1	2	0	0	2	2	0	1	0	1	1	0	0	2	0	0	0	2	1	0	0	1	0	2	1	1	0	2	1	2	0	2	0	0	1	0	1	0	0	0	0	0	1	2	1	1
chr19:46728435-46765713	Gbeg-Ggod-Ggog-Ppa-Ptre-Ptrs-Ptrt-Ptrv	37278		0	2	0	0	2	2	0	0	0	0	0	0	0	2	0	0	0	2	0	0	0	0	0	2	0	0	0	2	0	2	0	2	0	0	0	0	0	0	0	0	0	0	0	2	0	0
chr19:46765713-46772011	fixed_Gbeg-Ggod-Ggog	6298		2	2	0	0	2	2	0	2	0	2	2	0	0	2	0	0	0	3	2	0	0	2	0	2	2	2	0	2	2	2	0	2	0	0	2	0	2	0	0	0	0	0	2	2	2	2
chr19:46774193-46784951	fixed_Ppa-Ptre-Ptrs-Ptrt-Ptrv	10758	CEACAM21	0	3	0	1	2	3	2	0	1	0	0	1	1	2	1	2	2	2	0	0	2	0	2	3	0	0	3	2	0	2	2	3	2	3	0	2	0	2	1	2	0	1	0	3	0	0
chr19:46805155-46811054	fixed_Ppa-Ptre-Ptrs-Ptrt-Ptrv	5899		0	1	2	2	2	1	2	0	2	0	0	1	1	2	2	2	2	1	0	2	2	0	2	2	0	0	1	1	0	1	1	2	2	2	0	2	0	2	2	2	2	2	0	2	0	0
chr19:49778929-49784301	fixed_Pab-Ppy	5372		2	0	2	2	0	0	2	2	2	2	2	2	2	2	2	2	2	0	2	2	2	2	2	0	2	2	2	0	2	0	2	0	2	2	2	2	2	2	2	2	2	2	2	2	2	2
chr19:51389424-51406273	fixed_Ppa-Ptre-Ptrs-Ptrt-Ptrv	16849	DKFZp434J0226	0	2	2	2	2	2	2	0	2	0	0	2	2	2	2	2	2	2	0	2	2	0	2	2	0	0	2	2	0	3	2	3	2	2	0	2	0	2	2	2	2	2	0	3	0	0
chr19:51415788-51430779	fixed_Ppa	14991	RNU6-66,IGFL1	2	2	2	2	2	1	2	0	2	2	2	2	2	2	2	2	2	3	0	2	2	2	2	3	2	2	2	2	2	2	2	2	2	2	0	2	2	3	2	2	2	2	0	2	0	0
chr19:56056459-56065427	fixed_Gbeg-Ggod-Ggog	8968		2	2	0	0	2	2	0	2	0	2	2	0	0	2	0	0	0	1	2	0	0	2	0	2	2	2	0	1	2	2	0	2	0	0	2	0	2	0	0	0	0	0	2	3	2	3
chr19:56384246-56389029	fixed_Ppa-Ptre-Ptrs-Ptrt-Ptrv	4783		0	1	2	2	2	2	2	0	1	0	0	2	2	2	2	2	2	2	0	2	2	0	2	1	0	0	2	1	0	1	2	2	2	2	0	2	0	2	2	2	2	1	0	2	0	0
chr19:56396822-56402302	Gbeg-Ggod-Ggog-Ppa-Ptre-Ptrs-Ptrt-Ptrv	5480		0	2	0	0	2	2	0	0	0	0	0	0	0	2	0	0	0	2	0	0	0	0	0	2	0	0	0	2	0	2	0	2	0	0	0	0	0	0	0	0	0	0	0	2	0	0
chr19:56663205-56668204	fixed_Pab-Ppy	4999		2	0	2	3	0	0	2	2	2	2	2	2	2	2	2	2	2	0	2	3	2	2	2	0	2	2	2	0	2	0	2	0	2	2	2	2	2	2	2	2	2	2	2	2	2	3
chr19:56791151-56797906	fixed_Pab-Ppy	6755		2	0	2	2	0	0	2	2	2	2	2	2	2	2	2	2	2	0	2	2	2	2	2	0	2	2	2	0	2	0	3	0	2	2	2	2	2	2	2	2	2	2	2	2	2	1
chr19:57022963-57037816	fixed_Pab-Ppy	14853		2	0	2	2	0	0	2	2	2	2	1	2	2	2	2	2	2	0	2	2	2	2	2	0	2	2	2	0	2	0	2	0	2	2	2	2	2	2	2	2	2	2	2	2	2	2
chr19:57424148-57433994	fixed_Pab-Ppy	9846		2	0	2	1	0	0	2	2	1	2	1	2	2	2	1	2	1	0	2	1	2	2	2	0	2	2	2	0	2	0	2	0	2	2	2	2	2	2	2	2	2	2	2	2	2	2
chr19:58423491-58425649	fixed_Gbeg-Ggod-Ggog	2158		2	2	0	0	2	2	0	2	0	2	1	0	0	2	0	0	0	2	2	0	0	2	0	2	2	2	0	2	3	2	0	2	0	0	2	0	2	0	0	0	0	0	2	2	2	3
chr19:61699464-61703866	fixed_Gbeg-Ggod-Ggog	4402		2	2	0	0	2	2	0	2	0	2	2	0	0	2	0	0	0	2	2	0	0	2	0	2	2	2	0	2	1	2	0	2	0	0	2	0	2	0	0	0	0	0	2	2	2	2
chr19:63783523-63788721	fixed_Pab-Ppy	5198	MGC2752	2	0	2	2	0	0	2	2	2	2	2	2	2	2	2	2	2	0	3	2	2	2	2	0	2	2	2	0	2	0	2	0	2	2	2	1	2	2	2	2	2	3	2	2	3	2
chr2:78847-79959	fixed_Ppa-Ptre-Ptrs-Ptrt-Ptrv	1112		0	2	2	1	2	2	1	0	1	0	0	1	1	2	1	1	1	2	0	1	1	0	1	2	0	0	2	1	0	2	2	2	1	1	0	1	0	1	1	1	1	1	0	2	0	0
chr2:121856-129485	fixed_Pab-Ppy	7629		2	0	2	2	0	0	2	2	2	2	2	2	2	2	2	2	2	0	2	2	2	2	2	0	2	2	2	0	2	0	2	0	2	2	2	2	2	2	2	2	2	2	2	2	2	2
chr2:414864-418871	fixed_Ppa-Ptre-Ptrs-Ptrt-Ptrv	4007		0	2	2	2	2	2	2	0	2	0	0	2	2	2	2	2	2	2	0	2	2	0	2	2	0	0	2	2	0	2	1	2	2	2	0	2	0	2	2	2	2	2	0	2	0	0
chr2:444460-447043	fixed_Pab-Ppy	2583		2	0	2	2	0	0	2	2	2	2	2	2	2	2	2	2	2	0	2	2	2	2	2	0	2	2	2	0	2	0	3	0	2	2	2	2	2	2	2	2	2	2	2	2	2	2
chr2:703284-723540	fixed_Ppa-Ptre-Ptrs-Ptrt-Ptrv	20256		0	2	2	2	2	2	2	0	2	0	0	2	2	2	2	2	2	2	0	2	2	0	2	2	0	0	2	2	0	2	2	2	2	2	0	2	0	2	2	2	2	2	0	2	0	0
chr2:872990-886801	fixed_Gbeg-Ggod-Ggog	13811		2	2	0	0	2	2	0	2	0	2	2	0	0	2	0	0	0	2	2	0	0	2	0	1	2	2	0	2	2	2	0	2	0	0	2	0	2	0	0	0	0	0	2	2	2	2
chr2:1371694-1376527	fixed_Pab-Ppy	4833		2	0	2	2	0	0	2	2	2	2	1	2	2	2	2	2	2	0	2	2	1	2	2	0	1	2	1	0	1	0	1	0	1	2	1	2	1	2	2	1	1	2	1	2	2	2
chr2:2078412-2081190	fixed_Pab-Ppy	2778	MYT1L	2	0	2	2	0	0	2	2	2	2	2	2	2	2	2	2	2	0	2	2	2	2	2	0	2	2	2	0	2	0	2	0	2	2	2	2	2	2	2	2	2	2	2	2	2	2
chr2:3301985-3308341	fixed_Ppa-Ptre-Ptrs-Ptrt-Ptrv	6356	TSSC1	0	2	2	2	2	2	2	0	2	0	0	2	2	2	2	2	2	2	0	2	2	0	2	2	0	0	2	2	0	2	2	2	2	2	0	2	0	2	2	2	2	2	0	2	0	0
chr2:5607721-5613111	fixed_Pab-Ppy	5390		2	0	2	2	0	0	2	2	2	2	2	2	2	2	2	2	2	0	2	2	2	2	2	0	2	2	2	0	2	0	2	0	2	2	2	2	2	2	2	2	2	2	2	2	2	2
chr2:6070389-6077165	fixed_Ppa	6776		2	2	2	2	1	1	2	0	2	2	1	2	2	1	2	2	2	2	0	2	2	2	2	1	1	2	2	1	1	1	2	1	3	2	1	2	2	2	2	2	2	2	0	2	0	0
chr2:6180928-6182779	fixed_Gbeg-Ggod-Ggog	1851		2	1	0	0	2	2	0	2	0	2	1	0	0	1	0	0	0	2	2	0	0	2	0	2	2	2	0	2	2	2	0	2	0	0	2	0	2	0	0	0	0	0	2	2	2	2
chr2:6548500-6551812	fixed_Pab-Ppy	3312		2	0	2	2	0	0	2	2	2	2	2	2	2	2	2	1	2	0	2	2	2	2	2	0	2	2	2	0	2	0	2	0	2	2	2	2	2	2	2	2	2	2	2	2	2	2
chr2:7084847-7087700	fixed_Ppa-Ptre-Ptrs-Ptrt-Ptrv	2853	RNF144A	0	2	2	2	2	2	2	0	2	0	0	2	2	2	2	2	2	2	0	2	2	0	2	2	0	0	2	2	0	2	2	2	2	2	0	2	0	2	2	1	2	1	0	2	0	0
chr2:7489471-7490391	fixed_Ppa-Ptre-Ptrs-Ptrt-Ptrv	920	LOC100506274	0	1	1	2	2	1	1	0	1	0	0	1	1	1	1	1	1	1	0	1	1	0	1	1	0	0	1	1	0	1	1	1	1	1	0	1	0	1	1	2	1	1	0	1	0	0
chr2:8689179-8690913	fixed_Gbeg-Ggod-Ggog	1734		2	2	0	0	2	2	0	3	0	2	2	0	0	2	0	0	0	2	2	0	0	2	0	2	3	2	0	2	2	2	0	2	0	0	3	0	2	0	0	0	0	0	2	3	2	3
chr2:9613749-9614505	fixed_Gbeg-Ggod-Ggog	756		2	1	0	0	2	2	0	1	0	2	1	0	0	3	0	0	0	2	1	0	0	2	0	2	2	2	0	2	2	1	0	1	0	0	1	0	2	0	0	0	0	0	2	2	1	1
chr2:10157221-10161997	fixed_Pab-Ppy	4776		2	0	2	1	0	0	1	1	1	2	1	1	2	1	1	1	1	0	2	1	1	2	1	0	2	1	2	0	2	0	2	0	1	2	1	1	2	1	1	2	1	2	2	2	1	2
chr2:12502610-12504729	Gbeg-Ggod-Ggog-Ppa-Ptre-Ptrs-Ptrt-Ptrv	2119		0	2	0	0	2	2	0	0	0	0	0	0	0	2	0	0	0	2	0	0	0	0	0	2	0	0	0	2	0	2	0	2	0	0	0	0	0	0	0	0	0	0	0	2	0	0
chr2:13086885-13104161	fixed_Ppa-Ptre-Ptrs-Ptrt-Ptrv	17276		0	2	2	2	2	2	2	0	2	0	0	2	2	2	2	2	1	2	0	2	2	0	2	2	0	0	2	2	0	2	2	2	2	2	0	2	0	2	2	2	2	2	0	2	0	0
chr2:13708877-13712270	fixed_Ptre-Ptrs-Ptrt-Ptrv	3393		0	2	2	2	2	2	2	2	2	0	0	2	2	2	2	2	2	2	2	2	2	0	2	2	0	0	2	2	0	2	2	2	2	2	2	2	0	2	2	2	2	2	2	2	2	2
chr2:15145506-15148695	fixed_Ppa-Ptre-Ptrs-Ptrt-Ptrv	3189		0	2	2	2	2	2	3	0	2	0	0	2	2	2	2	2	2	2	0	2	2	0	2	2	0	0	2	2	0	2	2	2	2	2	0	2	0	2	2	2	2	2	0	2	0	0
chr2:19939921-19942789	fixed_Pab-Ppy	2868	FLJ12334	3	0	3	3	0	0	3	3	3	3	2	3	3	2	3	3	3	0	3	3	2	3	3	0	3	3	3	0	2	0	3	0	2	3	3	3	3	3	3	3	3	3	3	2	3	2
chr2:25777034-25785000	fixed_Gbeg-Ggod-Ggog	7966		2	2	0	0	2	2	0	2	0	2	2	0	0	2	0	0	0	2	2	0	0	2	0	2	2	2	0	2	3	2	0	2	0	0	2	0	2	0	0	0	0	0	2	2	2	2
chr2:29438933-29444041	fixed_Pab-Ppy	5108	ALK	2	0	2	2	0	0	2	2	2	2	1	2	2	2	2	2	2	0	2	2	2	2	2	0	2	2	2	0	2	0	3	0	2	2	2	2	2	2	2	2	2	2	2	2	2	2
chr2:29668028-29669522	fixed_Ppy	1494	ALK	2	2	2	2	0	2	2	2	3	2	2	2	2	2	2	2	2	0	2	3	2	2	3	1	2	2	2	0	2	0	3	2	2	2	2	2	2	2	2	2	2	2	2	2	2	2
chr2:31782473-31784883	fixed_Gbeg-Ggod-Ggog	2410		2	2	0	0	2	2	0	2	0	2	2	0	0	2	0	0	0	2	2	0	0	2	0	2	2	2	0	2	2	2	0	2	0	0	2	0	2	0	0	0	0	0	2	2	2	2
chr2:34008024-34016499	fixed_Pab-Ppy	8475		2	0	2	2	0	0	2	2	2	2	2	2	2	2	2	3	2	0	2	2	2	2	2	0	2	2	2	0	2	0	2	0	2	2	2	2	2	2	2	2	2	2	2	2	2	2
chr2:36184037-36185601	fixed_Gbeg-Ggod-Ggog	1564		3	2	0	0	2	2	0	2	0	2	2	0	0	2	0	0	0	2	2	0	0	2	0	2	2	1	0	2	1	2	0	2	0	0	2	0	2	0	0	0	0	0	2	2	2	2
chr2:37740092-37744238	fixed_Pab-Ppy	4146	CDC42EP3	2	0	2	2	0	0	2	2	2	2	1	2	2	2	2	2	2	0	2	2	2	2	2	0	2	2	2	0	2	0	2	0	2	2	2	2	2	2	2	2	2	2	2	2	2	2
chr2:39664095-39671222	fixed_Gbeg-Ggod-Ggog	7127	LOC728730	2	2	0	0	2	2	0	2	0	2	2	0	0	2	0	0	0	2	2	0	0	2	0	2	2	2	0	2	2	2	0	2	0	0	2	0	2	0	0	0	0	0	2	2	2	2
chr2:40969829-40976852	fixed_Gbeg-Ggod-Ggog	7023		2	2	0	0	2	2	0	2	0	2	2	0	0	2	0	0	0	2	2	0	0	2	0	1	2	2	0	1	2	2	0	2	0	0	2	0	2	0	0	0	0	0	2	2	2	2
chr2:41109042-41110679	fixed_Gbeg	1637		2	1	2	1	1	2	2	2	2	1	1	1	1	1	1	1	1	1	2	2	1	1	0	1	1	2	1	2	2	1	1	1	2	1	2	2	1	1	2	1	1	1	1	2	2	2
chr2:41618517-41619107	fixed_Gbeg	590		2	2	3	2	2	2	2	2	2	2	1	2	3	2	2	2	3	2	2	2	2	2	0	2	2	2	2	2	2	2	2	2	2	2	2	3	1	2	2	3	2	2	3	2	2	2
chr2:44000302-44003724	fixed_Ppa-Ptre-Ptrs-Ptrt-Ptrv	3422	LRPPRC	0	1	2	2	1	1	2	0	2	0	0	2	2	2	2	3	2	1	0	2	2	0	2	1	0	0	2	1	0	1	2	1	2	2	0	2	0	2	2	2	2	2	0	2	0	0
chr2:44261103-44262815	fixed_Gbeg-Ggod-Ggog	1712	PPM1B	2	2	0	0	1	2	0	2	0	2	2	0	0	2	0	0	0	1	2	0	0	2	0	2	2	2	0	1	2	2	0	2	0	0	2	0	2	0	0	0	0	0	2	2	2	2
chr2:44567897-44571327	fixed_Pab-Ppy	3430	CAMKMT	2	0	2	2	0	0	2	2	2	2	2	1	2	2	2	2	2	0	2	2	2	2	2	0	2	2	2	0	2	0	2	0	2	2	2	2	2	2	2	2	2	2	2	2	2	2
chr2:45302364-45309568	fixed_Pab-Ppy	7204	UNQ6975	2	0	2	2	0	0	2	2	2	2	1	2	2	2	2	2	2	0	2	2	2	2	2	0	2	2	2	0	2	0	2	0	2	2	2	2	2	2	2	2	2	2	2	2	2	2
chr2:49513956-49514546	fixed_Pab-Ppy	590		2	0	2	2	0	0	2	2	2	2	1	2	2	2	2	2	2	0	2	2	2	1	3	0	1	2	2	0	2	0	2	0	2	2	2	2	1	2	2	2	2	2	2	2	2	2
chr2:50160365-50161808	fixed_Gbeg-Ggod-Ggog	1443	NRXN1	2	2	0	0	2	2	0	2	0	2	2	0	0	2	0	0	0	1	2	0	0	2	0	2	3	2	0	1	2	2	0	2	0	0	2	0	2	0	0	0	0	0	2	2	2	2
chr2:50261022-50262657	fixed_Gbeg-Ggod-Ggog	1635	NRXN1	2	1	0	0	2	2	0	2	0	2	1	0	0	2	0	0	0	2	2	0	0	2	0	1	1	2	0	2	2	2	0	2	0	0	2	0	2	0	0	0	0	0	2	2	2	2
chr2:51119863-51127130	fixed_Pab-Ppy	7267		2	0	2	2	0	0	2	2	2	2	2	2	2	2	2	2	2	0	2	2	2	2	2	0	2	2	2	0	2	0	2	0	2	2	2	2	2	2	2	2	2	2	2	2	2	2
chr2:51951529-51953652	fixed_Ppa-Ptre-Ptrs-Ptrt-Ptrv	2123		0	2	2	2	2	2	2	0	2	0	0	2	2	2	2	2	2	2	0	2	2	0	2	2	0	0	2	2	0	2	2	2	1	2	0	2	0	2	2	2	2	2	0	2	0	0
chr2:52837243-52841693	fixed_Ppa-Ptre-Ptrs-Ptrt-Ptrv	4450		0	2	2	2	2	2	2	0	2	0	0	2	2	2	2	2	2	2	0	2	2	0	2	2	0	0	2	2	0	2	2	2	2	2	0	2	0	2	2	2	2	2	0	2	0	0
chr2:52997215-53001225	fixed_Pab-Ppy	4010		2	0	1	2	0	0	2	2	2	2	1	2	2	2	2	2	2	0	2	2	2	2	2	0	2	2	2	0	1	0	2	0	2	2	2	2	2	2	2	2	2	2	2	2	2	2
chr2:54263352-54280533	fixed_Pab-Ppy	17181	ACYP2	2	0	2	2	0	0	2	2	2	2	2	2	2	2	2	1	2	0	2	2	2	2	2	0	2	2	2	0	2	0	2	0	2	2	2	2	2	2	2	2	2	2	2	2	2	2
chr2:54369573-54370073	fixed_Gbeg-Ggod-Ggog	500	ACYP2	2	2	0	0	2	2	0	2	0	2	2	0	0	2	0	0	0	2	2	0	0	2	0	2	2	2	0	2	3	2	0	2	0	0	2	0	2	0	0	0	0	0	2	2	2	2
chr2:54671599-54676952	fixed_Ppa-Ptre-Ptrs-Ptrt-Ptrv	5353	SPTBN1	0	2	2	2	2	2	2	0	2	0	0	2	2	2	2	2	2	2	0	2	2	0	2	2	0	0	2	2	0	2	2	2	2	2	0	2	0	2	2	2	2	2	0	2	0	0
chr2:54767853-54774366	fixed_Pab-Ppy	6513		2	0	2	2	0	0	2	2	2	2	2	2	2	2	2	2	2	0	2	2	2	2	2	0	2	2	2	0	2	0	2	0	2	2	2	2	2	2	2	2	2	2	2	2	2	2
chr2:56351030-56357600	fixed_Pab-Ppy	6570	CCDC85A	2	0	2	2	0	0	2	2	2	2	2	2	2	2	2	2	2	0	2	2	2	2	2	0	2	2	2	0	2	0	2	0	2	2	2	2	2	2	2	2	2	2	2	2	2	2
chr2:56530954-56535749	fixed_Pab-Ppy	4795		2	0	2	2	0	0	2	2	2	2	2	2	2	2	2	2	2	0	2	2	2	2	2	0	2	2	2	0	2	0	2	0	2	2	2	2	2	2	2	2	2	2	2	2	2	2
chr2:56960933-56962035	fixed_Pab-Ppy	1102		2	0	1	1	0	0	2	1	2	2	2	2	2	2	2	2	2	0	1	2	2	2	2	0	1	2	1	0	1	0	2	0	2	2	2	2	1	2	2	2	2	2	2	2	2	1
chr2:57336453-57345751	Ppa-Ptre-Ptrs-Ptrt-Ptrv-Pab-Ppy	9298		0	0	2	2	0	0	2	0	2	0	0	2	2	2	2	1	2	0	0	2	2	0	2	0	0	0	1	0	0	0	2	0	2	2	0	2	0	2	2	1	2	2	0	2	0	0
chr2:58404071-58404858	fixed_Gbeg-Ggod-Ggog	787		2	2	0	0	3	2	0	2	0	2	2	0	0	2	0	0	0	2	2	0	0	2	0	2	2	2	0	2	2	2	0	2	0	0	2	0	2	0	0	0	0	0	2	2	2	2
chr2:59496234-59498051	fixed_Pab-Ppy	1817		2	0	2	2	0	0	2	2	2	2	2	2	1	2	2	1	2	0	2	2	2	2	2	0	2	2	2	0	2	0	2	0	2	2	2	2	2	2	2	2	2	2	2	2	2	2
chr2:60745383-60746511	fixed_Gbeg-Ggod-Ggog	1128		2	2	0	0	2	2	0	2	0	2	2	0	0	2	0	0	0	2	2	0	0	2	0	2	2	2	0	2	2	2	0	2	0	0	2	0	2	0	0	0	0	0	2	2	2	2
chr2:61248373-61256419	fixed_Ppa-Ptre-Ptrs-Ptrt-Ptrv	8046		0	2	2	3	2	2	2	0	2	0	0	2	2	2	2	2	2	2	0	2	3	0	2	2	0	0	2	2	0	2	2	2	2	2	0	2	0	2	2	2	2	2	0	2	0	0
chr2:62515248-62527492	fixed_Pab-Ppy	12244		2	0	2	2	0	0	2	2	2	2	2	2	2	2	2	2	2	0	2	2	2	2	2	0	2	2	2	0	2	0	2	0	2	2	2	2	2	2	2	2	2	2	2	2	2	2
chr2:63595113-63618732	fixed_Pab-Ppy	23619	WDPCP	2	0	2	2	0	0	2	2	2	2	1	2	2	2	2	2	2	0	2	2	2	2	2	0	2	2	2	0	2	0	2	0	2	2	2	2	2	2	2	2	2	2	2	2	2	2
chr2:66052673-66055833	fixed_Gbeg-Ggod-Ggog	3160		2	2	0	0	2	2	0	2	0	2	2	0	0	2	0	0	0	2	2	0	0	2	0	2	2	2	0	2	1	2	0	2	0	0	2	0	2	0	0	0	0	0	2	2	2	2
chr2:66358957-66360937	fixed_Hde	1980		2	2	2	2	2	2	3	2	2	2	2	2	2	2	2	2	2	2	2	2	2	2	2	2	2	2	2	2	2	2	2	2	2	2	2	2	2	2	2	2	2	2	2	2	2	2
chr2:68533350-68536368	fixed_Ppa-Ptre-Ptrs-Ptrt-Ptrv	3018		0	2	2	2	2	2	2	0	2	0	0	2	2	2	2	2	2	2	0	2	2	0	2	2	0	0	2	2	0	2	2	2	2	2	0	2	0	2	2	2	2	2	0	2	0	0
chr2:70073925-70076179	fixed_Pab-Ppy	2254	PCBP1-AS1	2	0	2	3	0	0	2	2	2	2	2	2	2	2	2	2	2	0	2	2	2	2	2	0	2	2	2	0	2	0	2	0	2	2	2	2	2	2	2	2	2	2	2	2	2	2
chr2:74353912-74356027	fixed_Ppa	2115	SLC4A5	2	2	2	2	2	2	2	0	2	2	2	2	2	2	2	2	2	2	0	2	2	2	2	2	2	2	2	2	1	2	2	2	2	2	0	2	2	2	2	2	2	2	0	2	0	0
chr2:74897290-74900453	fixed_Gbeg-Ggod-Ggog	3163		2	3	0	0	2	3	0	2	0	2	2	0	0	2	0	0	0	2	2	0	0	2	0	3	2	2	0	2	3	3	0	3	0	0	2	0	2	0	0	0	0	0	2	2	2	2
chr2:76113484-76114779	fixed_Pab-Ppy	1295		2	0	2	2	0	0	2	2	2	1	1	2	2	2	2	1	2	0	2	2	2	1	2	0	2	2	2	0	2	0	2	0	2	2	2	3	3	2	2	1	2	2	2	2	2	2
chr2:77121330-77125771	fixed_Gbeg-Ggod-Ggog	4441	LRRTM4	2	2	0	0	2	2	0	2	0	2	2	0	0	2	0	0	0	1	2	0	0	2	0	1	2	2	0	2	2	1	0	1	0	0	2	0	2	0	0	0	0	0	2	2	2	2
chr2:78641083-78641897	fixed_Pab-Ppy	814		2	0	2	2	0	0	2	2	2	2	1	2	2	2	2	1	2	0	2	2	1	2	2	0	1	2	2	0	2	0	2	0	2	2	2	2	1	2	2	1	2	2	2	2	2	2
chr2:78768842-78771191	fixed_Pab-Ppy	2349		1	0	2	2	0	0	2	2	2	2	1	2	2	2	2	2	2	0	2	2	2	2	2	0	1	2	2	0	2	0	2	0	2	2	2	2	2	2	2	1	2	2	2	2	2	2
chr2:81018822-81022160	fixed_Pab-Ppy	3338		2	0	1	2	0	0	2	2	2	2	2	2	2	2	2	3	2	0	2	2	2	2	2	0	2	2	2	0	2	0	2	0	2	2	2	2	2	2	2	2	2	2	2	2	2	2
chr2:81530099-81531918	fixed_Pab-Ppy	1819		2	0	2	2	0	0	2	2	2	2	2	2	2	2	2	2	2	0	2	2	2	2	2	0	2	2	2	0	1	0	2	0	2	2	2	2	2	2	2	1	2	2	2	2	2	2
chr2:81551044-81553018	Gbeg-Ggod-Ggog-Ppa-Ptre-Ptrs-Ptrt-Ptrv	1974		0	2	0	0	2	2	0	0	0	0	0	0	0	2	0	0	0	3	0	0	0	0	0	2	0	0	0	2	0	2	0	2	0	0	0	0	0	0	0	0	0	0	0	1	0	0
chr2:81760281-81764289	fixed_Gbeg-Ggod-Ggog	4008		2	2	0	0	1	2	0	2	0	1	1	0	0	2	0	0	0	2	2	0	0	2	0	2	1	2	0	2	2	2	0	2	0	0	2	0	2	0	0	0	0	0	1	2	2	2
chr2:82085947-82113833	fixed_Gbeg-Ggod-Ggog	27886		2	2	0	0	2	2	0	2	0	2	1	0	0	2	0	0	0	2	2	0	0	2	0	2	2	2	0	2	2	2	0	2	0	0	2	0	2	0	0	0	0	0	2	2	2	2
chr2:82635077-82642972	fixed_Ppa	7895		2	2	1	2	2	2	2	0	2	2	2	2	2	2	2	1	2	2	0	2	2	2	2	2	2	2	2	2	2	2	2	2	2	2	0	2	1	2	2	2	2	2	0	2	0	0
chr2:82845677-82867687	fixed_Gbeg-Ggod-Ggog	22010		2	2	0	0	2	2	0	2	0	2	2	0	0	2	0	0	0	2	2	0	0	2	0	2	2	2	0	2	2	2	0	2	0	0	2	0	2	0	0	0	0	0	2	2	2	2
chr2:83040350-83041049	fixed_Gbeg-Ggod-Ggog	699		2	2	0	0	1	2	0	2	0	2	1	0	0	1	0	0	0	2	2	0	0	2	0	1	2	2	0	1	2	1	0	2	0	0	2	0	2	0	0	0	0	0	1	1	2	2
chr2:83147465-83149537	fixed_Ppa	2072		2	2	2	2	2	2	3	0	2	2	2	2	2	2	2	3	2	2	0	3	2	2	2	2	2	2	2	2	2	2	2	2	2	2	0	3	2	2	2	2	2	2	0	2	0	0
chr2:83193071-83194167	fixed_Pab-Ppy	1096		2	0	1	2	0	0	2	2	2	2	1	2	2	1	2	2	2	0	2	2	2	2	2	0	2	2	2	0	2	0	2	0	2	2	2	3	2	2	2	2	2	2	2	2	2	2
chr2:84282941-84287872	fixed_Ptrv	4931		0	2	2	2	2	2	2	2	2	1	1	2	2	2	2	2	2	2	2	2	2	1	2	2	0	2	2	2	2	2	2	2	2	2	2	2	2	2	2	2	2	2	2	2	2	2
chr2:84453995-84457774	fixed_Ppa-Ptre-Ptrs-Ptrt-Ptrv	3779		0	2	2	2	1	2	2	0	2	0	0	2	2	2	2	2	2	2	0	2	2	0	2	2	0	0	2	2	0	2	2	2	2	2	0	2	0	2	2	2	2	2	0	2	0	0
chr2:89254192-89256676	fixed_Pab-Ppy	2484		2	0	2	2	0	0	2	2	2	2	2	2	2	4	2	3	2	0	2	2	2	2	2	0	2	3	2	0	2	0	2	0	2	2	1	2	2	2	2	2	2	2	2	3	2	2
chr2:89265615-89276149	fixed_Gbeg-Ggod-Ggog	10534		2	2	0	0	2	2	0	2	0	2	1	0	0	4	0	0	0	1	2	0	0	2	0	2	2	3	0	2	2	2	0	2	0	0	1	0	2	0	0	0	0	0	2	3	2	2
chr2:89277656-89293716	fixed_Gbeg-Ggod-Ggog	16060		2	2	0	0	2	2	0	2	0	2	2	0	0	4	0	0	0	2	2	0	0	2	0	2	2	3	0	2	2	2	0	2	0	0	1	0	2	0	0	0	0	0	2	3	2	2
chr2:89294904-89301973	fixed_Gbeg-Ggod-Ggog	7069		2	2	0	0	2	2	0	2	0	2	2	0	0	4	0	0	0	2	2	0	0	2	0	2	2	3	0	2	2	2	0	2	0	0	1	0	2	0	0	0	0	0	2	3	2	2
chr2:89303308-89304410	fixed_Gbeg-Ggod-Ggog	1102		2	2	0	0	2	2	0	2	0	2	2	0	0	4	0	0	0	2	2	0	0	2	0	2	2	3	0	2	1	2	0	2	0	0	1	0	2	0	0	0	0	0	2	3	2	2
chr2:89355158-89376188	fixed_Pab-Ppy	21030		3	0	2	2	0	0	2	2	2	2	2	2	2	4	2	2	2	0	2	2	2	3	2	0	2	3	2	0	2	0	2	0	2	2	1	2	2	2	2	2	2	2	2	3	2	2
chr2:89384371-89400222	fixed_Pab-Ppy	15851		3	0	2	2	0	0	2	2	3	2	2	2	3	4	2	2	2	0	2	3	2	3	2	0	2	3	2	0	2	0	2	0	2	2	1	2	2	2	2	2	2	2	2	4	2	2
chr2:89561674-89584284	fixed_Pab-Ppy	22610		3	0	2	2	0	0	2	2	2	2	2	2	2	4	2	2	2	0	2	2	2	3	2	0	2	3	2	0	2	0	2	0	2	2	1	2	2	2	2	2	2	2	2	3	2	2
chr2:89634460-89644314	fixed_Gbeg-Ggod-Ggog	9854		2	2	0	0	2	2	0	2	0	2	2	0	0	4	0	0	0	2	2	0	0	2	0	2	2	3	0	2	2	2	0	2	0	0	1	0	2	0	0	0	0	0	2	3	2	2
chr2:89645770-89675430	fixed_Gbeg-Ggod-Ggog	29660		2	2	0	0	2	2	0	2	0	2	2	0	0	4	0	0	0	2	2	0	0	2	0	2	2	3	0	2	2	2	0	2	0	0	1	0	2	0	0	0	0	0	2	3	2	2
chr2:89681610-89684541	fixed_Pab-Ppy	2931		2	0	2	2	0	0	2	2	2	2	2	2	2	4	2	3	2	0	2	2	2	2	2	0	2	3	2	0	2	0	2	0	2	2	1	2	2	2	2	2	2	2	2	3	2	2
chr2:89746182-89747800	fixed_Ptre-Ptrs-Ptrt-Ptrv	1618		0	2	2	2	2	2	2	2	2	0	0	2	2	2	2	4	2	3	2	2	2	0	2	2	0	0	2	2	0	2	2	2	2	2	1	2	0	2	2	2	2	2	2	2	2	2
chr2:95581554-95603831	fixed_Pab-Ppy	22277		2	0	2	2	0	0	2	2	2	2	2	2	2	2	2	2	2	0	2	2	2	2	2	0	2	2	2	0	2	0	2	0	2	2	2	2	2	2	2	2	2	2	2	2	2	2
chr2:95612702-95618982	fixed_Pab-Ppy	6280		8	0	8	8	0	0	8	9	8	8	6	8	8	10	7	10	8	0	9	8	8	8	8	0	7	8	7	0	8	0	8	0	8	8	9	9	7	8	8	7	8	8	9	12	9	9
chr2:96589371-96594717	fixed_Pab-Ppy	5346		2	0	2	2	0	0	2	2	2	2	2	2	2	2	2	2	2	0	2	2	2	2	2	0	2	2	2	0	2	0	2	0	2	2	2	2	2	2	2	2	2	2	2	2	2	2
chr2:97335766-97336944	fixed_Ppa	1178		2	2	3	2	2	2	2	0	2	2	1	2	2	4	3	2	4	0	0	4	3	3	4	2	2	1	2	2	4	1	4	2	2	3	0	3	4	4	2	2	2	2	0	3	0	0
chr2:97374009-97376318	fixed_Ppa	2309		4	2	2	2	2	2	2	0	2	4	3	2	2	4	2	2	2	2	0	2	2	4	2	2	4	2	2	2	4	2	2	2	2	2	0	2	4	3	2	2	2	2	0	4	0	0
chr2:97394923-97397394	fixed_Ppa	2471		4	2	2	2	2	2	2	0	2	4	3	2	2	4	2	1	2	2	0	2	2	4	2	2	4	2	2	2	4	2	2	2	2	2	0	2	4	3	2	2	2	2	0	4	0	0
chr2:97433559-97436446	fixed_Ppa	2887		2	2	3	2	2	3	2	0	2	2	1	2	2	4	3	2	4	0	0	4	3	3	4	2	2	1	2	2	4	1	4	3	2	3	0	3	4	3	2	2	2	2	0	3	0	0
chr2:97928752-97933878	fixed_Gbeg-Ggod-Ggog	5126	TMEM131	2	2	0	0	2	2	0	2	0	2	1	0	0	2	0	0	0	2	2	0	0	2	0	2	1	2	0	1	2	2	0	1	0	0	2	0	2	0	0	0	0	0	2	2	2	2
chr2:98260983-98265092	fixed_Pab-Ppy	4109	VWA3B	2	0	2	2	0	0	2	2	2	2	2	2	2	2	2	2	2	0	2	2	2	2	2	0	2	2	2	0	2	0	2	0	2	2	2	2	2	2	2	2	2	2	2	2	2	2
chr2:98334074-98339622	fixed_Ppa-Ptre-Ptrs-Ptrt-Ptrv	5548	CNGA3	0	2	2	2	2	2	2	0	2	0	0	2	2	2	2	2	2	2	0	2	2	0	2	2	0	0	2	2	0	2	2	2	2	2	0	3	0	2	2	2	2	2	0	2	0	0
chr2:98956529-98979013	fixed_Pab-Ppy	22484		2	0	2	3	0	0	2	2	2	2	2	2	2	2	2	2	2	0	2	2	2	2	2	0	2	2	2	0	2	0	2	0	2	2	2	2	2	2	2	2	2	2	2	2	2	2
chr2:99196213-99199403	fixed_Ptre-Ptrs-Ptrt-Ptrv	3190		0	4	2	2	4	4	2	1	2	0	0	2	2	2	2	2	2	4	2	2	2	0	2	4	0	0	2	4	0	4	2	4	2	2	1	2	0	2	2	2	2	2	2	2	1	2
chr2:103787123-103789608	fixed_Pab-Ppy	2485		2	0	2	2	0	0	2	2	2	2	2	2	2	2	2	2	1	0	2	1	2	2	2	0	2	2	2	0	2	0	2	0	2	2	2	2	2	2	2	2	2	2	2	2	2	2
chr2:106283467-106305911	fixed_Ppa-Ptre-Ptrs-Ptrt-Ptrv	22444		0	2	2	2	2	2	2	0	2	0	0	2	2	2	2	2	2	2	0	2	2	0	2	2	0	0	2	2	0	2	2	2	2	2	0	2	0	2	2	2	2	2	0	2	0	0
chr2:106500115-106518516	fixed_Ppa-Ptre-Ptrs-Ptrt-Ptrv	18401		0	2	2	2	2	2	2	0	2	0	0	2	2	2	2	2	2	2	0	2	2	0	2	2	0	0	2	2	0	2	2	2	2	2	0	2	0	2	2	2	2	2	0	2	0	0
chr2:106551537-106555777	fixed_Ppa-Ptre-Ptrs-Ptrt-Ptrv	4240		0	2	2	2	2	2	2	0	2	0	0	2	2	2	2	2	2	3	0	2	2	0	2	2	0	0	2	2	0	2	2	2	2	2	0	2	0	2	2	2	2	2	0	2	0	0
chr2:107001311-107005216	fixed_Ppa-Ptre-Ptrs-Ptrt-Ptrv	3905		0	2	2	2	2	2	2	0	2	0	0	2	2	2	2	2	2	2	0	2	2	0	2	2	0	0	2	2	0	2	2	2	2	2	0	2	0	2	2	2	2	2	0	2	0	0
chr2:107120278-107129541	fixed_Ppa-Ptre-Ptrs-Ptrt-Ptrv	9263		0	2	2	2	2	2	2	0	2	0	0	2	2	2	2	2	2	2	0	2	2	0	2	2	0	0	2	2	0	2	2	2	2	2	0	2	0	2	2	2	2	2	0	2	0	0
chr2:107212139-107232636	fixed_Ppa-Ptre-Ptrs-Ptrt-Ptrv	20497		0	2	2	2	2	2	2	0	2	0	0	2	2	2	2	2	2	1	0	2	2	0	2	2	0	0	2	2	0	2	2	2	2	2	0	2	0	2	2	2	2	2	0	2	0	0
chr2:107658737-107662159	fixed_Ppa-Ptre-Ptrs-Ptrt-Ptrv	3422		0	1	2	2	2	2	2	0	2	0	0	2	2	2	2	2	1	2	0	2	2	0	2	2	0	0	2	1	0	1	2	1	1	1	0	2	0	2	2	2	2	2	0	1	0	0
chr2:108160774-108182108	fixed_Ppa-Ptre-Ptrs-Ptrt-Ptrv	21334		0	2	2	2	2	2	2	0	2	0	0	2	2	2	2	2	2	2	0	2	2	0	2	2	0	0	2	2	0	2	2	2	2	2	0	2	0	2	2	2	2	2	0	2	0	0
chr2:108291975-108303428	Ppa-Ptre-Ptrs-Ptrt-Ptrv-Pab-Ppy	11453	SULT1C2	0	0	2	2	0	0	2	0	2	0	0	2	2	2	2	2	2	0	0	2	2	0	2	0	0	0	2	0	0	0	2	0	2	2	0	2	0	2	2	2	2	2	0	2	0	0
chr2:108303428-108346923	fixed_Ppa-Ptre-Ptrs-Ptrt-Ptrv	43495	SULT1C2P1	0	2	2	2	2	2	2	0	2	0	0	2	2	2	2	2	2	2	0	2	2	0	2	2	0	0	2	2	0	2	2	2	2	2	0	2	0	2	2	2	2	2	0	2	0	0
chr2:108356544-108359384	fixed_Pab-Ppy	2840		2	0	2	2	0	0	2	2	2	2	2	2	2	2	2	1	2	0	2	2	2	2	2	0	2	2	2	0	2	0	2	0	2	2	2	2	2	2	2	2	2	2	2	2	2	2
chr2:109782267-109786318	fixed_Ppa-Ptre-Ptrs-Ptrt-Ptrv	4051		0	2	2	2	2	2	2	0	2	0	0	2	2	2	2	2	2	2	0	2	2	0	2	2	0	0	2	2	0	2	2	2	2	2	0	2	0	2	2	2	2	2	0	2	0	0
chr2:109822346-109825515	fixed_Ptre-Ptrs-Ptrt-Ptrv	3169		0	2	1	1	2	2	1	2	1	0	0	2	2	2	2	1	1	2	2	2	2	0	1	2	0	0	1	2	0	2	1	2	2	1	2	1	0	2	2	1	2	1	2	2	2	2
chr2:110165887-110167085	Gbeg-Ggod-Ggog-Ppa-Ptre-Ptrs-Ptrt-Ptrv	1198		0	2	0	0	2	2	0	0	0	0	0	0	0	4	0	0	0	3	0	0	0	0	0	2	0	0	0	2	0	2	0	2	0	0	0	0	0	0	0	0	0	0	0	5	0	0
chr2:110167085-110186798	fixed_Ppa-Ptre-Ptrs-Ptrt-Ptrv	19713	MIR4267	0	2	2	2	2	2	2	0	2	0	0	2	2	4	2	2	2	2	0	2	2	0	2	2	0	0	2	2	0	2	2	2	2	2	0	2	0	2	2	2	2	2	0	5	0	0
chr2:110498476-110511576	fixed_Ppa-Ptre-Ptrs-Ptrt-Ptrv	13100		0	2	1	2	2	2	1	0	1	0	0	1	1	3	1	1	1	2	0	1	1	0	1	2	0	0	1	2	0	2	1	2	1	1	0	2	0	1	1	2	1	1	0	5	0	0
chr2:110511576-110513553	Gbeg-Ggod-Ggog-Ppa-Ptre-Ptrs-Ptrt-Ptrv	1977		0	2	0	0	2	2	0	0	0	0	0	0	0	4	0	0	0	3	0	0	0	0	0	2	0	0	0	2	0	2	0	2	0	0	0	0	0	0	0	0	0	0	0	6	0	0
chr2:110851037-110854359	fixed_Ptre-Ptrs-Ptrt-Ptrv	3322		0	2	2	2	2	2	2	2	2	0	0	2	2	2	2	2	2	2	2	2	2	0	2	2	0	0	2	3	0	2	2	2	2	2	2	2	0	2	2	2	2	2	2	2	2	2
chr2:111518772-111520061	fixed_Pab-Ppy	1289	ACOXL	2	0	2	2	0	0	2	2	2	2	1	2	2	2	2	2	2	0	2	2	2	2	2	0	2	2	2	0	2	0	2	0	2	2	2	2	2	3	2	2	2	2	2	2	3	2
chr2:113374433-113407892	fixed_Ppa-Ptre-Ptrs-Ptrt-Ptrv	33459	IL37	0	2	2	2	2	2	2	0	2	0	0	2	2	2	2	2	2	2	0	2	2	0	2	2	0	0	2	2	0	2	2	2	2	2	0	2	0	2	2	2	2	2	0	2	0	0
chr2:113488978-113512788	fixed_Ppa-Ptre-Ptrs-Ptrt-Ptrv	23810	IL36B	0	2	2	2	2	2	2	0	2	0	0	2	2	2	2	2	2	2	0	2	2	0	2	2	0	0	2	2	0	2	2	2	2	2	0	2	0	2	2	2	2	2	0	2	0	0
chr2:113740726-113742364	fixed_Gbeg-Ggod-Ggog	1638	PAX8,LOC654433	2	3	0	0	2	3	0	2	0	2	2	0	0	2	0	0	0	2	2	0	0	2	0	2	2	2	0	2	2	3	0	2	0	0	2	0	2	0	0	0	0	0	2	2	3	3
chr2:114249378-114251038	fixed_Gbeg-Ggod-Ggog	1660		2	2	0	0	2	2	0	2	0	2	1	0	0	2	0	0	0	2	2	0	0	2	0	2	2	1	0	2	2	2	0	2	0	0	2	0	2	0	0	0	0	0	2	2	2	2
chr2:114519178-114520283	fixed_Gbeg-Ggod-Ggog	1105		2	1	0	0	2	1	0	2	0	1	1	0	0	2	0	0	0	2	2	0	0	2	0	2	2	2	0	2	2	1	0	1	0	0	2	0	2	0	0	0	0	0	2	2	2	1
chr2:116292808-116303100	fixed_Ppa-Ptre-Ptrs-Ptrt-Ptrv	10292	DPP10	0	2	2	2	2	2	2	0	2	0	0	2	2	2	2	2	2	1	0	2	2	0	2	2	0	0	2	1	0	2	2	2	2	2	0	2	0	2	2	2	2	2	0	2	0	0
chr2:117357466-117381755	fixed_Gbeg-Ggod-Ggog	24289		2	2	0	0	2	2	0	2	0	2	2	0	0	2	0	0	0	1	2	0	0	2	0	1	2	2	0	2	2	2	0	1	0	0	2	0	2	0	0	0	0	0	2	2	2	2
chr2:118034096-118037187	fixed_Pab-Ppy	3091		1	0	1	2	0	0	2	1	2	1	1	1	2	1	2	2	1	0	1	2	2	2	1	0	2	1	2	0	2	0	1	0	2	1	1	2	1	1	1	1	2	2	2	2	2	1
chr2:118439831-118441918	fixed_Gbeg-Ggod-Ggog	2087	CCDC93	2	2	0	0	2	2	0	2	0	2	2	0	0	2	0	0	0	2	2	0	0	2	0	2	2	2	0	2	2	2	0	2	0	0	2	0	2	0	0	0	0	0	2	2	2	2
chr2:119856769-119859731	fixed_Ppa	2962		1	2	2	2	2	2	2	0	2	2	1	2	2	2	2	2	2	2	0	2	2	1	2	2	2	2	2	2	2	2	2	2	2	2	0	2	2	2	2	2	2	2	0	2	0	0
chr2:119983059-119992406	fixed_Pab-Ppy	9347	SCTR	2	0	2	2	0	0	2	2	2	2	2	2	2	2	2	2	2	0	2	2	2	2	2	0	2	2	2	0	2	0	2	0	2	2	2	2	2	2	2	2	2	2	2	2	2	2
chr2:122551480-122553708	fixed_Pab-Ppy	2228		3	0	2	2	0	0	2	2	2	2	2	2	2	2	2	2	2	0	2	2	2	2	2	0	2	2	2	0	2	0	2	0	2	2	2	2	2	2	2	2	2	2	2	2	2	2
chr2:123046485-123052094	fixed_Ppa-Ptre-Ptrs-Ptrt-Ptrv	5609		0	2	2	2	2	2	2	0	2	0	0	2	2	2	2	2	2	2	0	2	2	0	2	2	0	0	2	2	0	2	2	2	2	2	0	2	0	2	2	2	2	2	0	2	0	0
chr2:123268740-123270077	fixed_Gbeg-Ggod-Ggog	1337		2	2	0	0	2	2	0	2	0	2	2	0	0	2	0	0	0	2	2	0	0	2	0	2	2	2	0	2	2	2	0	2	0	0	2	0	2	0	0	0	0	0	2	2	2	2
chr2:123277581-123290539	fixed_Ppa	12958		2	2	2	2	2	2	2	0	2	2	2	2	2	2	2	2	2	2	0	2	2	2	2	2	2	2	2	2	2	2	2	2	2	2	0	2	2	2	2	2	2	2	0	2	0	0
chr2:123517109-123521838	Gbeg-Ggod-Ggog-Ppa-Ptre-Ptrs-Ptrt-Ptrv	4729		0	2	0	0	2	2	0	0	0	0	0	0	0	2	0	0	0	2	0	0	0	0	0	2	0	0	0	2	0	2	0	2	0	0	0	0	0	0	0	0	0	0	0	2	0	0
chr2:123544365-123557395	fixed_Ppa-Ptre-Ptrs-Ptrt-Ptrv	13030		0	2	2	2	2	2	2	0	2	0	0	2	2	2	2	2	2	2	0	2	2	0	2	2	0	0	2	2	0	2	2	2	2	2	0	2	0	2	2	2	2	2	0	2	0	0
chr2:123938482-123975445	Gbeg-Ggod-Ggog-Ppa-Ptre-Ptrs-Ptrt-Ptrv	36963		0	2	0	0	2	2	0	0	0	0	0	0	0	2	0	0	0	2	0	0	0	0	0	2	0	0	0	2	0	2	0	2	0	0	0	0	0	0	0	0	0	0	0	2	0	0
chr2:123977486-123985607	fixed_Pab-Ppy	8121		2	0	2	2	0	0	2	2	2	2	2	2	2	2	2	2	2	0	2	2	2	2	2	0	2	2	2	0	2	0	2	0	2	2	2	2	2	2	2	2	2	2	3	2	2	2
chr2:124956183-124963696	fixed_Ppa-Ptre-Ptrs-Ptrt-Ptrv	7513	CNTNAP5	0	2	2	2	2	2	2	0	2	0	0	2	2	2	2	2	1	2	0	2	2	0	2	2	0	0	2	2	0	2	2	2	2	1	0	2	0	2	2	2	2	2	0	2	0	0
chr2:125215111-125216114	fixed_Ppa-Ptre-Ptrs-Ptrt-Ptrv	1003	CNTNAP5	0	2	2	2	1	2	2	0	2	0	0	2	2	2	2	1	2	2	0	2	2	0	2	2	0	0	2	2	0	2	2	2	1	2	0	2	0	2	2	2	2	2	0	2	0	0
chr2:126124972-126126265	fixed_Pab-Ppy	1293		1	0	1	2	0	0	2	2	2	2	1	2	2	2	2	2	2	0	2	2	2	2	2	0	2	2	2	0	1	0	2	0	1	2	2	2	2	2	2	2	2	1	2	1	2	2
chr2:126444304-126446210	fixed_Gbeg-Ggod-Ggog	1906		2	2	0	0	2	2	0	2	1	2	2	0	0	2	0	0	0	1	2	0	0	2	0	1	2	2	0	2	1	2	0	2	0	0	2	0	2	0	0	0	0	0	2	1	2	2
chr2:127453904-127469905	fixed_Ppa	16001		2	2	2	2	2	2	2	0	2	2	1	2	2	2	2	2	2	2	0	3	2	2	2	2	2	2	2	2	2	2	2	2	2	2	0	2	2	2	2	2	2	2	0	2	0	0
chr2:129049141-129052333	fixed_Hde	3192		2	2	1	1	2	2	1	2	2	2	2	1	1	2	1	1	1	2	2	2	2	2	2	2	2	2	1	2	2	2	1	2	2	1	2	1	2	1	1	1	1	1	2	2	2	2
chr2:130735690-130743158	fixed_Hde	7468		2	2	2	2	2	2	2	2	2	2	3	2	3	2	2	2	2	2	2	3	2	2	2	2	2	2	2	2	2	2	2	2	2	2	2	1	2	2	2	2	2	2	2	2	2	2
chr2:133222211-133229362	fixed_Pab-Ppy	7151	NCKAP5	2	0	2	2	0	0	2	2	2	2	2	2	2	2	2	2	2	0	2	2	2	2	2	0	2	2	2	0	2	0	2	0	2	2	2	2	2	2	2	2	2	2	2	2	2	2
chr2:134475107-134479748	fixed_Gbeg-Ggod-Ggog	4641		2	1	0	0	2	2	1	2	0	2	1	0	0	1	0	1	0	1	2	0	0	2	0	1	2	2	0	1	2	1	0	1	0	1	2	0	2	0	0	0	0	0	2	2	2	2
chr2:134869833-134873296	fixed_Gbeg-Ggod-Ggog	3463	MGAT5	2	2	0	0	2	2	0	2	0	2	2	0	0	2	0	0	0	2	2	0	0	2	0	2	2	2	0	2	2	2	0	2	0	0	2	0	2	0	0	0	0	0	2	2	2	2
chr2:136026817-136029016	fixed_Pab-Ppy	2199	R3HDM1	2	0	2	2	0	0	2	2	2	2	2	2	2	2	2	3	2	0	2	2	2	2	2	0	2	2	2	0	2	0	2	0	2	2	2	2	2	2	2	1	2	2	2	2	2	2
chr2:136352564-136365537	fixed_Gbeg-Ggod-Ggog	12973		2	2	0	0	2	2	0	2	0	2	2	0	0	2	0	0	0	2	2	0	0	2	0	2	2	2	0	2	2	2	0	2	0	0	2	0	2	0	0	0	0	0	2	2	2	2
chr2:140480255-140485929	fixed_Gbeg-Ggod-Ggog	5674		2	2	0	0	2	2	0	2	0	2	2	0	0	2	0	0	0	2	2	0	0	2	0	2	2	2	0	2	2	2	0	2	0	0	2	0	2	0	0	0	0	0	2	2	2	2
chr2:141436242-141439468	fixed_Pab-Ppy	3226	LRP1B	2	0	1	2	0	0	2	2	2	2	1	2	2	2	2	2	2	0	2	2	2	2	2	0	1	2	2	0	1	0	2	0	2	2	1	2	2	2	2	2	2	2	2	2	2	2
chr2:141648299-141653481	fixed_Pab-Ppy	5182	LRP1B	2	0	1	2	0	0	2	2	2	2	1	2	1	1	2	1	2	0	2	2	2	2	2	0	2	1	2	0	2	0	2	0	1	1	2	2	2	1	2	1	2	2	2	1	2	2
chr2:141754092-141756362	fixed_Ppa	2270	LRP1B	2	2	1	2	2	2	2	0	2	2	1	2	1	2	2	1	2	2	0	2	2	2	2	2	1	2	2	2	1	2	2	2	2	2	0	2	2	2	2	2	2	2	0	2	0	0
chr2:141938074-141941930	fixed_Pab-Ppy	3856	LRP1B	2	0	2	2	0	0	2	1	1	2	1	2	1	1	2	2	2	0	1	2	1	1	2	0	2	2	2	0	1	0	2	0	1	2	1	2	2	1	1	2	2	2	1	1	1	1
chr2:142860736-142862503	fixed_Ptre-Ptrs-Ptrt-Ptrv	1767		0	2	2	2	1	2	2	1	2	0	0	2	2	2	2	1	1	1	2	2	2	0	2	1	0	0	2	1	0	1	2	2	2	2	2	2	0	2	2	2	1	2	2	2	1	2
chr2:144558709-144567309	fixed_Pab-Ppy	8600	GTDC1	2	0	2	2	0	0	2	2	2	2	1	2	2	2	2	3	2	0	2	2	2	2	2	0	2	2	2	0	2	0	2	0	2	2	2	2	2	2	2	2	2	2	2	2	2	2
chr2:146458691-146464169	fixed_Ppa	5478		2	2	1	2	2	2	2	0	2	2	2	2	2	2	2	2	2	2	0	2	2	2	2	2	2	2	2	2	2	2	2	2	2	2	0	2	2	2	2	2	2	2	1	2	0	0
chr2:147206046-147208198	fixed_Ppa-Ptre-Ptrs-Ptrt-Ptrv	2152		0	2	1	2	1	2	2	0	2	0	0	2	2	2	2	1	2	2	0	2	1	0	2	2	0	0	2	2	0	2	2	2	2	2	0	2	0	2	2	1	2	2	0	2	0	0
chr2:147340731-147341923	fixed_Ptre-Ptrs-Ptrt-Ptrv	1192		0	2	2	2	2	3	2	2	2	0	0	2	2	2	2	2	2	2	2	2	2	0	2	2	0	0	2	2	0	2	2	2	1	2	2	2	0	2	2	2	2	2	2	2	2	2
chr2:149814378-149837710	fixed_Ppa	23332		2	2	2	2	2	2	2	0	2	2	2	2	2	2	2	2	2	2	0	2	2	2	2	2	2	2	2	2	2	2	2	2	2	2	0	2	2	2	2	2	2	2	0	2	0	0
chr2:153418340-153424704	fixed_Ppa	6364		2	2	2	2	1	2	2	0	2	2	2	2	2	2	2	2	2	2	0	2	2	2	2	2	2	2	2	2	2	2	2	2	2	2	0	2	2	2	2	2	2	2	0	2	0	0
chr2:153664004-153665309	fixed_Pab-Ppy	1305		2	0	2	2	0	0	2	2	1	2	2	2	2	2	2	2	2	0	2	2	2	2	2	0	3	2	2	0	2	0	2	0	2	2	2	2	3	2	2	2	2	2	2	2	2	2
chr2:154299605-154303264	fixed_Pab-Ppy	3659		2	0	2	2	0	0	2	2	2	2	1	2	2	2	2	2	2	0	2	2	2	2	2	0	2	2	1	0	2	0	3	0	2	2	2	2	2	2	2	2	2	2	2	2	2	2
chr2:155883943-155885114	Gbeg-Ggod-Ggog-Ppa-Ptre-Ptrs-Ptrt-Ptrv	1171		0	2	0	0	2	2	0	0	0	0	0	0	0	2	0	0	0	2	0	0	0	0	0	2	0	0	0	1	0	2	0	2	0	0	0	0	0	0	0	0	0	0	0	2	0	0
chr2:163191930-163192562	fixed_Gbeg-Ggod-Ggog	632	KCNH7	2	2	0	0	2	2	0	2	0	2	2	0	0	2	0	0	0	2	2	0	0	2	0	2	2	1	0	2	2	2	0	2	0	0	2	0	3	0	0	0	0	0	2	2	2	2
chr2:166901803-166905088	fixed_Gbeg-Ggod-Ggog	3285	SCN9A	2	2	0	0	2	2	0	2	0	2	2	0	0	1	0	0	0	1	2	0	0	2	0	1	2	2	0	2	1	2	0	2	0	0	2	0	2	0	0	0	0	0	2	2	2	2
chr2:168086443-168087173	fixed_Pab-Ppy	730		2	0	1	2	0	0	2	2	1	1	2	2	1	1	1	1	1	0	1	1	1	1	1	0	2	2	2	0	3	0	2	0	1	1	1	2	2	1	2	2	2	1	2	2	2	2
chr2:168120754-168122827	fixed_Pab-Ppy	2073		2	0	2	2	0	0	2	2	2	2	2	1	2	2	2	2	2	0	2	2	2	2	2	0	2	2	2	0	2	0	2	0	1	2	2	2	2	2	2	2	2	2	2	2	2	2
chr2:169295401-169295994	fixed_Hde	593	CERS6	2	2	2	2	2	2	2	2	2	2	2	2	2	2	2	1	2	2	2	2	2	2	2	2	2	2	1	2	2	3	2	2	2	1	2	2	2	2	2	2	2	2	2	2	2	2
chr2:170807671-170809053	fixed_Pab-Ppy	1382	MYO3B	2	0	2	2	0	0	3	2	2	2	2	2	2	2	2	2	2	0	2	2	3	2	2	0	2	2	2	0	1	0	3	0	3	2	2	2	2	2	2	3	2	2	2	2	2	2
chr2:171442333-171443164	fixed_Pab-Ppy	831		2	0	2	2	0	0	2	2	2	2	1	2	2	2	2	2	2	0	2	2	2	2	2	0	2	2	2	0	1	0	2	0	2	3	2	3	2	2	2	2	2	2	2	2	2	2
chr2:173399598-173404176	fixed_Gbeg-Ggod-Ggog	4578	RAPGEF4	2	2	0	0	2	2	0	2	0	2	2	0	0	2	0	0	0	2	2	0	0	2	0	2	2	2	0	2	2	2	0	2	0	0	2	0	2	0	0	0	0	0	2	2	2	2
chr2:175276442-175285794	fixed_Pab-Ppy	9352		2	0	2	2	0	0	2	2	2	2	2	2	2	2	2	2	2	0	2	2	2	2	2	0	2	2	2	0	2	0	2	0	2	2	2	2	2	2	2	2	2	2	2	2	2	2
chr2:175846031-175848770	fixed_Ppa-Ptre-Ptrs-Ptrt-Ptrv	2739		0	2	2	2	2	2	2	0	2	0	0	2	2	2	2	1	2	2	0	2	2	0	2	2	0	0	2	2	0	2	2	2	2	2	0	2	0	2	2	2	2	2	0	2	0	0
chr2:176771484-176772862	fixed_Gbeg-Ggod-Ggog	1378		2	2	0	0	2	2	0	2	0	1	2	0	0	2	0	0	0	2	2	0	0	2	0	2	2	1	0	2	2	2	0	1	0	0	1	0	2	0	0	0	0	0	2	1	2	2
chr2:177229304-177230904	fixed_Pab-Ppy	1600		1	0	1	2	0	0	2	2	2	2	2	1	2	2	2	2	2	0	2	2	2	2	2	0	2	2	2	0	2	0	2	0	2	2	2	2	2	2	2	2	2	2	2	2	2	2
chr2:177312572-177315746	fixed_Pab-Ppy	3174		2	0	2	2	0	0	2	2	2	2	2	2	2	2	2	2	2	0	2	2	2	2	2	0	2	2	2	0	2	0	2	0	2	2	2	2	2	2	2	2	2	2	2	2	2	2
chr2:178425138-178428109	fixed_Ppa-Ptre-Ptrs-Ptrt-Ptrv	2971	PDE11A	0	2	2	2	2	2	2	0	2	0	0	2	2	2	2	2	2	2	0	2	2	0	2	2	0	0	2	2	0	2	2	2	2	2	0	2	0	2	2	2	2	2	0	2	0	0
chr2:179565607-179575660	fixed_Gbeg-Ggod-Ggog	10053	CCDC141	2	2	0	0	2	2	0	2	0	2	2	0	0	2	0	0	0	2	2	0	0	2	0	2	2	2	0	2	2	2	0	2	0	0	2	0	2	0	0	0	0	0	2	2	2	2
chr2:179579067-179581701	fixed_Pab-Ppy	2634	CCDC141	2	0	1	2	0	0	2	2	2	2	1	2	2	2	2	2	2	0	2	2	2	2	2	0	2	2	2	0	2	0	2	0	2	2	2	2	2	2	2	2	2	2	2	2	2	2
chr2:180239208-180242757	fixed_Gbeg-Ggod-Ggog	3549	ZNF385B	2	2	0	0	2	2	0	2	0	1	2	0	0	2	0	0	0	2	2	0	0	2	0	2	2	2	0	2	2	2	0	2	0	0	2	0	2	0	0	0	0	0	2	2	2	2
chr2:182693586-182695180	fixed_Ptre-Ptrs-Ptrt-Ptrv	1594	PPP1R1C	0	2	2	2	2	3	2	2	2	0	0	2	2	2	2	2	2	2	2	2	2	0	2	2	0	0	2	2	0	2	2	2	2	2	2	2	0	2	2	2	2	2	2	2	2	2
chr2:183382113-183386192	fixed_Ppa	4079		2	2	2	2	2	2	2	0	2	2	2	2	2	2	2	2	2	2	0	2	2	2	2	2	2	2	2	2	2	2	2	2	2	2	0	2	2	2	2	2	2	2	0	2	0	0
chr2:183472288-183476512	fixed_Ppa-Ptre-Ptrs-Ptrt-Ptrv	4224		0	2	2	2	2	2	2	0	2	0	0	2	2	2	2	2	2	2	0	2	2	0	2	2	0	0	2	2	0	2	2	2	2	2	0	2	0	2	2	2	2	2	0	2	0	0
chr2:184446074-184449744	fixed_Gbeg-Ggod-Ggog	3670		2	2	0	0	2	3	0	2	0	2	2	0	0	2	0	0	0	2	2	0	0	2	0	2	2	2	0	2	2	2	0	2	0	0	2	0	2	0	0	0	0	0	2	2	2	2
chr2:184927875-184931097	fixed_Pab-Ppy	3222		2	0	2	2	0	0	2	2	2	2	2	2	2	2	2	1	2	0	2	2	2	2	2	0	2	2	2	0	2	0	2	0	2	2	2	2	1	2	2	2	2	2	2	2	2	2
chr2:185404970-185405470	fixed_Pab-Ppy	500	ZNF804A	2	0	2	2	0	0	2	2	2	2	2	2	2	2	2	2	2	0	2	2	2	2	2	0	2	3	2	0	2	0	3	0	2	2	2	2	2	2	2	2	2	2	2	2	2	2
chr2:185751366-185752672	fixed_Gbeg-Ggod-Ggog	1306		2	2	0	0	1	2	0	2	0	2	1	0	0	2	0	0	0	2	2	0	0	2	0	2	1	2	0	2	1	1	0	2	0	0	2	0	1	0	0	0	0	0	1	2	2	2
chr2:186015730-186032830	fixed_Gbeg-Ggod-Ggog	17100		2	2	0	0	2	2	0	2	0	2	1	0	0	2	0	0	0	1	2	0	0	2	0	2	1	1	0	2	2	2	0	2	0	0	2	0	1	0	0	0	0	0	1	2	2	2
chr2:186561912-186568795	fixed_Pab-Ppy	6883		2	0	2	2	0	0	2	2	2	2	2	2	2	2	2	1	2	0	2	2	2	2	2	0	2	2	2	0	2	0	2	0	2	2	2	2	2	2	2	2	2	2	2	2	2	2
chr2:186668420-186671934	fixed_Pab-Ppy	3514		2	0	2	2	0	0	2	2	2	2	1	2	2	2	2	1	2	0	2	2	2	2	2	0	2	2	2	0	2	0	2	0	2	2	2	2	2	2	2	2	2	2	2	2	2	2
chr2:188227494-188236794	fixed_Pab-Ppy	9300		2	0	2	2	0	0	2	2	2	2	2	2	2	2	2	2	2	0	2	2	2	2	2	0	2	2	2	0	2	0	2	0	2	2	2	2	2	2	2	2	2	2	2	2	2	2
chr2:188466134-188469225	fixed_Hde	3091		2	2	2	2	2	2	2	2	2	2	2	2	2	2	2	1	2	2	2	2	2	2	2	2	2	2	2	2	2	2	2	2	2	2	2	2	2	2	2	2	2	2	2	2	2	2
chr2:191850417-191850917	fixed_Pab-Ppy	500	MYO1B	2	0	2	2	0	0	2	2	2	2	2	2	1	2	2	3	2	0	2	2	2	2	2	0	1	2	2	0	3	0	2	0	2	1	2	2	2	2	2	1	3	2	2	2	2	2
chr2:193524696-193525969	fixed_Ptrv	1273		0	2	2	2	2	2	2	2	2	2	2	2	2	2	2	1	1	2	2	2	2	2	2	2	0	2	2	2	2	2	2	2	2	2	2	2	2	2	2	2	2	2	2	1	2	2
chr2:193525969-193530417	fixed_Gbeg-Ggod-Ggog	4448		2	2	0	0	2	2	0	2	0	2	2	0	0	2	0	0	0	2	2	0	0	2	0	2	2	2	0	2	2	2	0	2	0	0	2	0	2	0	0	0	0	0	2	2	2	2
chr2:193627011-193648584	fixed_Gbeg-Ggod-Ggog	21573		2	2	0	0	2	2	0	2	0	2	2	0	0	2	0	0	0	2	2	0	0	2	0	2	2	2	0	2	2	2	0	2	0	0	2	0	2	0	0	0	0	0	2	2	2	2
chr2:193686808-193708023	fixed_Pab-Ppy	21215		1	0	1	1	0	0	1	1	1	1	1	1	1	2	1	1	1	0	1	1	1	1	1	0	1	1	1	0	0	0	1	0	1	1	1	1	0	1	1	1	1	1	1	2	1	1
chr2:193965887-193974176	fixed_Pab-Ppy	8289		2	0	1	2	0	0	2	2	2	2	1	2	2	2	2	1	2	0	2	2	2	2	2	0	2	2	2	0	1	0	2	0	2	2	2	2	2	2	2	2	2	2	2	2	2	2
chr2:194257780-194259452	fixed_Pab-Ppy	1672		2	0	2	2	0	0	2	2	2	2	2	2	2	2	2	1	2	0	2	2	2	2	2	0	2	2	2	0	2	0	2	0	2	2	2	2	2	2	2	2	2	2	3	1	2	2
chr2:195275519-195277632	fixed_Gbeg-Ggod-Ggog	2113		1	1	0	0	2	1	0	2	0	2	2	0	0	1	0	0	0	2	1	0	0	2	0	1	2	1	0	2	1	1	0	1	0	0	1	0	1	0	0	0	0	0	3	1	1	1
chr2:195401261-195403249	fixed_Gbeg-Ggod-Ggog	1988		2	2	0	0	2	2	0	2	0	2	2	0	0	2	0	0	0	2	2	0	0	2	0	2	2	2	0	2	2	2	0	2	0	0	2	0	1	0	0	0	0	0	2	2	2	2
chr2:195423101-195429377	fixed_Ppa-Ptre-Ptrs-Ptrt-Ptrv	6276		0	2	2	2	2	2	2	0	2	0	0	2	1	2	2	2	1	2	0	2	2	0	2	2	0	0	2	2	0	1	2	2	2	2	0	2	0	2	2	1	2	2	0	2	0	0
chr2:196040871-196041500	fixed_Pab-Ppy	629		2	0	2	2	0	0	2	2	2	2	2	2	2	2	2	2	2	0	2	2	1	2	2	0	2	3	3	0	2	0	2	0	2	2	2	2	2	2	2	2	2	2	2	3	2	2
chr2:196695084-196695853	fixed_Pab-Ppy	769		2	0	3	2	0	0	2	2	2	2	2	2	2	2	2	1	2	0	2	2	2	2	2	0	2	2	2	0	2	0	2	0	2	2	2	2	2	2	2	2	1	1	2	2	2	2
chr2:196730570-196731389	fixed_Gbeg-Ggod-Ggog	819	STK17B	2	1	0	0	1	2	0	2	0	2	1	0	0	2	0	0	0	2	2	0	0	2	0	1	1	2	0	1	2	1	0	1	0	0	2	0	1	0	0	0	0	0	2	2	2	2
chr2:197619693-197620560	fixed_Gbeg-Ggod-Ggog	867	ANKRD44	2	2	0	0	2	2	0	2	0	2	2	0	0	2	0	0	0	2	2	0	0	2	0	2	2	2	0	3	2	2	0	2	0	0	2	0	2	0	0	0	0	0	2	2	2	2
chr2:198707160-198707747	fixed_Gbeg-Ggod-Ggog	587	PLCL1	2	3	0	0	2	2	0	2	0	2	1	0	0	2	0	0	0	2	2	0	0	2	0	2	2	2	0	2	2	2	0	2	0	0	2	0	2	0	0	0	0	0	2	2	2	2
chr2:198778617-198786135	fixed_Pab-Ppy	7518		2	0	2	2	0	0	2	2	2	2	1	2	2	2	2	2	2	0	2	2	2	2	2	0	2	2	2	0	1	0	2	0	2	2	2	2	2	2	2	2	2	2	2	2	2	2
chr2:199536927-199537934	fixed_Gbeg-Ggod-Ggog	1007		2	2	0	0	1	2	0	2	0	2	1	0	0	2	0	0	0	1	2	0	0	2	0	1	1	2	0	2	2	2	0	2	0	0	2	0	1	0	0	0	0	0	2	2	2	2
chr2:203416685-203432481	fixed_Ppa	15796	ICA1L	2	2	2	2	2	2	2	0	2	2	2	2	2	2	2	2	2	2	0	2	2	2	2	2	2	2	2	2	2	2	2	2	2	2	0	2	1	2	2	2	3	2	0	2	0	0
chr2:204598904-204601931	fixed_Ppa	3027		2	2	2	2	2	2	2	0	2	2	2	2	2	2	2	2	2	2	0	2	2	2	2	2	2	2	2	3	2	2	2	2	2	2	0	2	2	2	2	2	2	2	0	2	0	0
chr2:207631343-207636035	fixed_Gbeg-Ggod-Ggog	4692		2	2	0	0	2	2	0	2	0	2	1	0	0	2	0	0	0	2	2	0	0	2	0	2	2	2	0	2	2	2	0	2	0	0	2	0	2	0	0	0	0	0	2	2	2	2
chr2:209083908-209101517	fixed_Pab-Ppy	17609		2	0	2	2	0	0	2	2	2	2	2	2	2	2	2	2	2	0	2	2	2	2	2	0	1	2	2	0	1	0	2	0	2	2	2	2	2	2	2	2	2	2	2	2	2	2
chr2:212404434-212405280	fixed_Pab-Ppy	846	ERBB4	3	0	2	2	0	0	2	2	2	2	1	2	2	2	2	2	2	0	2	2	2	2	2	0	2	2	2	0	2	0	2	0	2	2	2	3	2	2	3	2	2	2	2	2	2	2
chr2:216716429-216719126	fixed_Gbeg-Ggod-Ggog	2697	XRCC5	2	2	0	0	2	2	0	2	0	2	2	0	0	2	0	0	0	2	2	0	0	2	0	2	2	2	0	2	2	2	0	1	0	0	2	0	2	0	0	0	0	0	2	2	2	2
chr2:217229094-217230488	fixed_Pab-Ppy	1394	IGFBP2	2	0	2	3	0	0	2	2	2	2	2	2	2	2	3	2	2	0	2	2	2	2	2	0	2	2	2	0	3	0	2	0	2	2	3	2	2	3	2	2	2	2	2	2	2	3
chr2:217681915-217682915	fixed_Ppa-Ptre-Ptrs-Ptrt-Ptrv	1000		0	2	2	3	2	2	2	0	2	0	0	2	2	2	2	2	2	2	0	2	2	0	2	2	0	0	2	2	0	2	2	2	2	2	0	2	0	2	2	2	2	2	0	2	0	0
chr2:217693474-217695549	fixed_Gbeg-Ggod-Ggog	2075		2	2	0	0	2	2	0	1	0	2	2	0	0	2	0	0	0	2	2	0	0	2	0	2	2	1	0	2	1	2	0	2	0	0	1	0	2	0	0	0	0	0	3	2	1	1
chr2:219304549-219309447	fixed_Pab-Ppy	4898	TTLL4	2	0	2	2	0	0	2	2	2	2	2	2	2	2	2	2	2	0	2	2	2	2	2	0	2	2	2	0	2	0	2	0	2	2	2	2	2	2	2	2	2	2	2	2	3	2
chr2:220421236-220422805	fixed_Pab-Ppy	1569		2	0	2	1	0	0	2	2	2	2	2	2	2	2	2	2	2	0	2	2	2	2	2	0	2	2	2	0	2	0	2	0	2	2	2	2	2	2	2	2	2	2	2	2	2	2
chr2:220445433-220448266	Gbeg-Ggod-Ggog-Ppa-Ptre-Ptrs-Ptrt-Ptrv	2833		0	2	0	0	1	2	0	0	0	0	0	0	0	2	0	0	0	2	0	0	0	0	0	2	0	0	0	1	0	2	0	2	0	0	0	0	0	0	0	0	0	0	0	2	0	0
chr2:222762970-222764735	Gbeg-Ggod-Ggog-Ppa-Ptre-Ptrs-Ptrt-Ptrv	1765		0	2	0	0	2	2	0	0	0	0	0	0	0	2	0	0	0	2	0	0	0	0	0	3	0	0	0	2	0	2	0	2	0	0	0	0	0	0	0	0	0	0	0	2	0	0
chr2:223109787-223112867	fixed_Ppa-Ptre-Ptrs-Ptrt-Ptrv	3080	SGPP2	0	2	2	1	1	2	2	0	2	0	0	2	2	2	2	2	2	2	0	2	2	0	2	2	0	0	1	1	0	1	2	2	2	2	0	2	0	2	2	2	2	2	0	2	0	0
chr2:223245658-223258146	fixed_Pab-Ppy	12488	MOGAT1	2	0	3	2	0	0	2	2	2	2	2	2	2	2	2	3	3	0	2	3	2	2	2	0	2	2	2	0	3	0	2	0	2	2	2	2	2	2	2	2	2	2	2	3	2	2
chr2:223738917-223741068	fixed_Ppa	2151		2	2	2	2	2	2	2	0	2	2	2	2	2	2	2	2	2	2	0	3	2	2	2	2	2	2	2	1	2	2	2	2	2	2	0	2	2	2	2	2	2	1	0	2	0	0
chr2:223809852-223820192	fixed_Gbeg	10340		2	2	2	2	2	2	1	2	1	2	2	2	1	2	2	2	2	2	2	1	2	2	0	2	2	2	2	2	2	2	2	2	0	1	2	1	2	2	1	2	2	2	2	2	2	2
chr2:224287596-224296411	fixed_Ppa	8815		2	2	2	2	2	2	2	0	2	2	1	2	2	2	2	2	2	2	0	2	2	2	2	2	2	2	2	2	2	2	1	2	2	2	0	1	2	2	2	2	2	2	0	2	0	0
chr2:224911254-224914458	fixed_Pab-Ppy	3204		2	0	2	2	0	0	2	2	2	2	1	2	2	2	2	2	2	0	2	2	2	2	2	0	2	2	2	0	2	0	2	0	2	2	2	2	2	2	2	2	2	2	2	2	2	2
chr2:225472156-225473832	fixed_Pab-Ppy	1676	DOCK10	2	0	2	2	0	0	2	2	2	2	2	2	1	2	2	2	2	0	2	2	2	2	2	0	2	1	2	0	3	0	2	0	2	2	2	2	2	2	2	2	2	2	2	2	2	2
chr2:228657158-228658291	fixed_Gbeg	1133	SPHKAP	2	2	2	2	2	2	2	2	2	2	2	2	2	1	2	2	2	3	2	2	2	2	0	2	2	2	2	2	2	2	1	2	2	2	2	2	2	2	2	2	2	2	2	2	2	2
chr2:228957745-228960636	fixed_Ppa-Ptre-Ptrs-Ptrt-Ptrv	2891		0	1	1	2	1	2	2	0	2	0	0	1	2	1	2	2	2	1	0	2	2	0	2	1	0	0	2	2	0	1	2	2	2	2	0	2	0	2	2	2	2	1	0	2	0	0
chr2:229402842-229410445	fixed_Ppa-Ptre-Ptrs-Ptrt-Ptrv	7603		0	2	2	2	2	2	2	0	2	0	0	2	2	2	2	2	2	1	0	2	2	0	2	2	0	0	2	2	0	2	2	2	2	2	0	2	0	2	2	2	2	2	0	2	0	0
chr2:230733191-230737479	fixed_Pab-Ppy	4288		2	0	2	2	0	0	2	2	2	2	2	2	2	2	2	2	2	0	2	2	2	2	2	0	2	2	2	0	2	0	2	0	2	2	2	2	2	2	2	2	2	2	2	2	2	2
chr2:231154975-231159528	fixed_Ppa-Ptre-Ptrs-Ptrt-Ptrv	4553		0	2	2	2	2	2	2	0	2	0	0	2	2	2	2	2	2	2	0	2	2	0	2	2	0	0	2	2	0	2	2	2	2	2	0	2	0	2	3	2	2	2	0	2	0	0
chr2:231801092-231807324	fixed_Ppa-Ptre-Ptrs-Ptrt-Ptrv	6232	ARMC9	0	2	2	2	2	2	2	0	2	0	0	2	2	2	2	2	2	2	0	2	2	0	2	2	0	0	2	2	0	2	2	2	2	2	0	2	0	2	2	2	2	2	0	2	0	0
chr2:234405420-234406865	fixed_Ppa-Ptre-Ptrs-Ptrt-Ptrv	1445		0	2	2	2	2	2	3	0	2	0	0	2	3	2	2	2	2	2	0	2	2	0	2	2	0	0	2	2	0	1	2	2	2	2	0	2	0	2	2	2	2	2	0	2	0	0
chr2:235012695-235013512	fixed_Ppa-Ptre-Ptrs-Ptrt-Ptrv	817		0	2	2	3	2	2	3	0	2	0	0	2	2	1	2	2	2	1	0	2	2	0	2	2	0	0	2	2	0	1	3	1	2	2	0	2	0	2	2	2	2	2	0	2	0	0
chr2:235683375-235687145	fixed_Pab-Ppy	3770		2	0	2	2	0	0	2	2	2	2	1	2	2	2	2	2	2	0	2	2	2	2	2	0	2	2	2	0	2	0	2	0	2	2	2	2	2	2	2	2	2	2	2	2	2	2
chr2:235850862-235851804	fixed_Gbeg-Ggod-Ggog	942		2	2	0	0	2	1	0	2	0	2	2	0	0	2	0	0	0	2	2	0	0	2	0	2	2	2	0	2	1	2	0	1	0	0	1	0	2	0	0	0	0	0	2	2	2	2
chr2:237765223-237765723	fixed_Pab-Ppy	500		2	0	2	2	0	0	3	3	3	2	2	2	2	2	3	2	2	0	2	2	2	1	2	0	2	1	2	0	2	0	3	0	3	2	2	2	2	2	3	2	2	2	2	2	2	3
chr2:240619149-240633370	fixed_Gbeg-Ggod-Ggog	14221	PRR21,OR6B3	2	2	0	0	2	2	0	2	0	2	2	0	0	2	0	0	0	2	2	0	0	2	0	2	2	2	1	2	2	2	0	2	1	0	2	0	2	0	0	0	0	0	2	2	2	2
chr2:241237294-241237794	fixed_Pab-Ppy	500		1	0	2	1	0	0	2	2	2	2	1	1	2	2	2	2	2	0	2	2	2	1	2	0	1	2	2	0	1	0	2	0	2	2	2	3	1	2	2	2	2	2	2	2	1	2
chr2:241272718-241291744	fixed_Pab-Ppy	19026	AQP12A	3	0	4	5	0	0	4	4	5	4	4	4	5	5	4	4	4	0	4	4	4	4	4	0	4	4	4	0	4	0	6	0	5	5	3	3	4	5	4	5	4	4	4	5	4	4
chr2:242476907-242482688	fixed_Ptre-Ptrs-Ptrt-Ptrv	5781		0	2	1	2	2	2	1	5	2	0	0	2	2	2	2	2	2	3	7	1	2	0	1	2	0	0	2	1	0	2	2	2	2	2	6	1	0	2	2	2	2	2	7	2	4	8
chr2:242497044-242521883	fixed_Ppa-Ptre-Ptrs-Ptrt-Ptrv	24839		0	2	2	2	2	2	2	0	2	0	0	2	2	2	2	2	2	2	0	2	2	0	2	2	0	0	2	2	0	2	2	2	2	2	0	1	0	2	2	2	2	2	0	2	0	0
chr2:242521883-242533438	Gbeg-Ggod-Ggog-Ppa-Ptre-Ptrs-Ptrt-Ptrv	11555		0	2	0	0	2	2	0	0	0	0	0	0	0	2	0	0	0	2	0	0	0	0	0	2	0	0	0	2	0	2	0	2	0	0	0	0	0	0	0	0	0	0	0	2	0	0
chr20:111357-135618	fixed_Ppa-Ptre-Ptrs-Ptrt-Ptrv	24261	DEFB128	0	2	2	2	2	2	2	0	2	0	0	2	2	2	2	2	2	2	0	2	2	0	2	2	0	0	2	2	0	2	2	2	2	2	0	2	0	2	2	2	2	2	0	2	0	0
chr20:999889-1014538	fixed_Ppa-Ptre-Ptrs-Ptrt-Ptrv	14649		0	2	2	2	2	2	2	0	2	0	0	2	2	2	2	2	2	2	0	2	2	0	2	2	0	0	2	2	0	2	2	2	2	2	0	2	0	2	2	2	2	2	0	2	0	0
chr20:1481046-1483397	fixed_Ppa-Ptre-Ptrs-Ptrt-Ptrv	2351	SIRPD	0	2	2	2	2	2	2	0	2	0	0	2	2	2	2	2	2	2	0	2	2	0	2	2	0	0	2	2	0	2	2	2	2	2	0	2	0	2	2	2	2	2	0	2	0	0
chr20:1593203-1598626	Gbeg-Ggod-Ggog-Ppa-Ptre-Ptrs-Ptrt-Ptrv	5423		0	3	0	0	3	3	0	0	0	0	0	0	0	2	0	0	0	2	0	0	0	0	0	2	0	0	0	2	0	3	0	3	0	0	0	0	0	0	0	0	0	0	0	2	0	0
chr20:1622697-1626226	fixed_Pab-Ppy	3529		3	0	2	2	0	0	2	2	2	2	2	2	2	2	2	2	2	0	2	2	2	3	3	0	2	2	2	0	2	0	2	0	3	2	2	3	2	2	3	2	2	2	2	2	2	2
chr20:1650182-1664951	fixed_Ppa-Ptre-Ptrs-Ptrt-Ptrv	14769		0	3	2	2	2	2	2	0	2	0	0	2	2	2	2	2	2	2	0	2	2	0	2	2	0	0	2	2	0	2	2	2	2	2	0	2	0	2	2	2	2	2	0	2	0	0
chr20:1695504-1702327	fixed_Ppa-Ptre-Ptrs-Ptrt-Ptrv	6823	LOC100289473	0	2	2	2	2	2	2	0	2	0	0	2	2	2	2	2	2	2	0	2	2	0	2	2	0	0	2	2	0	2	2	2	2	2	0	2	0	2	2	2	2	2	0	2	0	0
chr20:3337321-3346051	fixed_Ptrs-Ptrt	8730		2	2	2	2	2	2	2	2	2	2	2	2	2	2	2	2	2	2	2	2	2	2	2	2	2	2	2	2	0	2	2	2	2	2	2	2	0	2	2	2	2	2	2	2	2	2
chr20:3970683-3985954	fixed_Ppa-Ptre-Ptrs-Ptrt-Ptrv	15271		0	2	2	2	2	2	2	0	2	0	0	2	2	2	2	2	2	2	0	2	2	0	2	2	0	0	2	2	0	2	2	2	2	2	0	2	0	2	2	2	2	2	0	2	0	0
chr20:4638423-4644051	fixed_Gbeg-Ggod-Ggog	5628		2	2	0	0	2	2	0	2	0	2	2	0	0	2	0	0	0	2	2	0	0	2	0	2	2	2	0	2	2	2	0	2	0	0	2	0	2	0	0	0	0	0	2	2	2	2
chr20:5231833-5240064	Gbeg-Ggod-Ggog-Ppa-Ptre-Ptrs-Ptrt-Ptrv	8231	PROKR2	0	2	0	0	2	2	0	0	0	0	0	0	0	2	0	0	0	2	0	0	0	0	0	2	0	0	0	2	0	2	0	2	0	0	0	0	0	0	0	0	0	0	0	2	0	0
chr20:5688890-5691083	fixed_Pab-Ppy	2193	C20orf196	2	0	2	2	0	0	2	2	2	2	1	2	2	2	2	1	2	0	2	2	2	2	2	0	1	2	2	0	2	0	2	0	2	2	2	2	2	2	2	2	2	2	2	2	2	2
chr20:5706565-5708567	Gbeg-Ggod-Ggog-Ppa-Ptre-Ptrs-Ptrt-Ptrv	2002	C20orf196	0	2	0	0	2	2	0	0	0	0	0	0	0	2	0	0	0	2	0	0	0	0	0	2	0	0	0	2	0	2	0	2	0	0	0	0	0	0	0	0	0	0	0	2	0	0
chr20:5708567-5709705	fixed_Ppa-Ptre-Ptrs-Ptrt-Ptrv	1138	C20orf196	0	2	1	2	2	2	2	0	2	0	0	1	2	2	2	2	2	2	0	2	2	0	2	2	0	0	2	2	0	2	2	3	2	1	0	2	0	2	1	2	2	2	0	2	0	0
chr20:6243882-6244382	fixed_Ppa-Ptre-Ptrs-Ptrt-Ptrv	500		0	3	2	3	2	2	2	0	2	0	0	2	2	2	2	2	2	2	0	1	2	0	2	2	0	0	3	2	0	2	2	2	2	2	0	2	0	2	2	2	2	2	0	2	0	0
chr20:8750598-8752241	fixed_Gbeg-Ggod-Ggog	1643	PLCB1	2	2	0	0	1	2	0	2	0	2	1	0	0	2	0	0	0	2	2	0	0	2	0	2	2	2	0	2	2	2	0	2	0	0	2	0	2	0	0	0	0	0	2	2	2	2
chr20:9861212-9895201	fixed_Ppa-Ptre-Ptrs-Ptrt-Ptrv	33989		0	2	2	2	2	2	2	0	2	0	0	2	2	2	2	2	2	2	0	2	2	0	2	2	0	0	2	2	0	2	2	2	2	2	0	2	0	2	2	2	2	2	0	2	0	0
chr20:11206446-11212941	fixed_Ppa-Ptre-Ptrs-Ptrt-Ptrv	6495		0	2	2	2	2	2	2	0	2	0	0	2	2	2	2	2	2	2	0	3	2	0	2	2	0	0	2	2	0	2	2	2	2	2	0	2	0	2	2	2	2	2	0	2	0	0
chr20:11514464-11531714	fixed_Ppa-Ptre-Ptrs-Ptrt-Ptrv	17250		0	2	2	2	2	2	2	0	2	0	0	2	2	2	2	1	2	2	0	2	2	0	2	2	0	0	2	2	0	2	2	2	2	2	0	2	0	2	2	2	2	2	0	2	0	0
chr20:12433100-12434771	fixed_Ppa-Ptre-Ptrs-Ptrt-Ptrv	1671		0	2	1	2	2	2	2	0	2	0	0	2	2	2	2	2	2	2	0	2	2	0	2	2	0	0	2	2	0	2	2	2	2	2	0	2	0	2	2	2	2	2	0	2	0	0
chr20:14224786-14228797	fixed_Ptre-Ptrs-Ptrt-Ptrv	4011	MACROD2	0	2	2	2	2	3	2	2	2	0	0	2	2	2	2	2	2	2	2	2	2	0	2	2	0	0	2	2	0	2	2	2	2	2	2	2	0	2	2	2	2	2	2	2	2	2
chr20:14385836-14386429	fixed_Pab-Ppy	593	MACROD2	2	0	3	2	0	0	2	2	2	2	2	2	2	2	2	1	2	0	1	2	2	2	2	0	2	2	2	0	2	0	2	0	2	2	2	2	1	3	2	2	2	2	2	2	2	2
chr20:15737044-15738453	fixed_Gbeg-Ggod-Ggog	1409	MACROD2	2	2	0	0	2	2	0	2	0	2	1	0	0	2	0	0	0	2	2	0	0	1	0	2	1	1	0	2	2	2	0	2	0	0	2	0	1	0	0	0	0	0	1	2	2	2
chr20:17132436-17134752	fixed_Gbeg-Ggod-Ggog	2316		2	2	0	0	1	1	0	2	0	2	2	0	0	2	0	0	0	2	2	0	0	2	0	1	2	2	0	2	1	2	0	2	0	0	2	0	2	0	0	0	0	0	2	2	2	2
chr20:17685342-17686035	fixed_Ppa-Ptre-Ptrs-Ptrt-Ptrv	693		0	2	2	2	2	2	1	0	2	0	0	2	2	2	2	2	2	1	0	2	2	0	2	1	0	0	2	2	0	2	2	1	2	2	0	1	0	2	2	2	2	2	0	2	0	0
chr20:22180500-22187167	fixed_Pab-Ppy	6667		2	0	2	2	0	0	2	2	2	2	1	2	2	2	2	2	2	0	2	2	2	2	2	0	2	2	2	0	2	0	2	0	2	2	2	2	2	2	2	2	2	2	2	2	2	2
chr20:23377654-23403777	fixed_Gbeg-Ggod-Ggog	26123	CST11	2	2	0	0	2	2	0	2	0	2	2	0	0	2	0	0	0	2	2	0	0	2	0	2	2	2	0	2	2	2	0	2	0	0	2	0	2	0	0	0	0	0	2	2	2	2
chr20:23985278-23992543	fixed_Pab-Ppy	7265		2	0	2	2	0	0	2	2	2	2	2	2	2	2	2	2	2	0	2	2	2	2	2	0	2	2	2	0	2	0	2	0	2	2	2	2	2	2	2	2	2	2	2	2	2	2
chr20:24239917-24242628	fixed_Gbeg-Ggod-Ggog	2711		2	2	0	0	2	2	0	2	0	2	2	0	0	2	0	0	0	2	2	0	0	2	0	2	2	2	0	1	2	2	0	1	0	0	2	0	2	0	0	0	0	0	2	2	2	2
chr20:24619732-24621469	fixed_Gbeg-Ggod-Ggog	1737		2	2	0	0	2	2	0	2	0	2	2	0	0	2	0	0	0	2	2	0	0	2	0	2	2	2	0	2	2	2	0	2	0	0	2	0	2	0	0	0	0	0	2	2	2	2
chr20:25451310-25453364	fixed_Gbeg-Ggod-Ggog	2054	NINL	2	2	0	0	2	2	0	2	0	2	2	0	0	2	0	0	0	2	2	0	0	3	0	2	2	2	0	2	1	2	0	2	0	0	2	0	2	0	0	0	0	0	2	2	2	2
chr20:25457599-25461941	fixed_Pab-Ppy	4342	NINL	2	0	2	2	0	0	2	2	3	2	2	2	2	2	2	2	2	0	2	2	2	2	3	0	2	2	2	0	2	0	2	0	2	2	2	2	2	2	2	2	2	2	2	2	2	2
chr20:25481667-25483067	fixed_Pab-Ppy	1400	NINL	2	0	2	2	0	0	2	3	2	2	2	2	2	2	2	2	2	0	2	2	2	2	2	0	2	2	2	0	2	0	2	0	2	2	2	2	2	3	2	2	2	2	2	2	3	2
chr20:31376137-31378705	fixed_Gbeg-Ggod-Ggog	2568		2	2	0	0	2	2	0	3	0	2	2	0	0	2	0	0	0	3	2	0	0	2	0	2	2	2	0	2	2	2	0	2	0	0	2	0	2	0	0	0	0	0	2	2	2	2
chr20:31385052-31407576	fixed_Gbeg-Ggod-Ggog	22524		2	2	0	0	2	2	0	2	0	2	2	0	0	2	0	0	0	2	2	0	0	2	0	2	2	2	0	2	2	2	0	2	0	0	2	0	2	0	0	0	0	0	2	2	2	2
chr20:32270066-32272206	fixed_Ppa-Ptre-Ptrs-Ptrt-Ptrv	2140		0	2	2	2	2	2	2	0	2	0	0	2	2	2	2	2	2	2	0	2	2	0	2	2	0	0	2	2	0	2	2	2	2	2	0	1	0	2	2	2	2	2	0	2	0	0
chr20:35069153-35073005	fixed_Gbeg-Ggod-Ggog	3852	RBL1	2	2	0	0	2	2	0	2	0	2	1	0	0	2	0	0	0	2	2	0	0	2	0	2	1	2	0	2	2	2	0	2	0	0	2	0	2	0	0	0	0	0	2	2	2	2
chr20:37149079-37151244	fixed_Ppa-Ptre-Ptrs-Ptrt-Ptrv	2165		0	1	1	2	2	1	1	0	1	0	0	1	1	2	2	2	2	3	0	2	1	0	1	2	0	0	2	2	0	2	2	2	2	1	0	2	0	2	2	2	2	1	0	2	0	0
chr20:39871353-39871853	fixed_Ppa-Ptre-Ptrs-Ptrt-Ptrv	500		0	2	2	3	2	2	2	0	2	0	0	2	2	2	2	2	1	2	0	2	2	0	2	2	0	0	1	2	0	3	2	2	2	2	0	2	0	2	2	1	2	2	0	2	0	0
chr20:40782824-40788892	fixed_Pab-Ppy	6068	PTPRT	2	0	2	2	0	0	2	2	2	2	1	2	2	2	2	2	2	0	2	3	2	2	2	0	2	2	2	0	2	0	2	0	2	2	2	2	2	2	2	2	2	2	2	2	2	2
chr20:43629598-43630329	fixed_Gbeg-Ggod-Ggog	731	WFDC8	2	2	0	0	2	2	0	2	0	2	2	0	0	2	0	0	0	2	2	0	0	2	0	2	2	2	0	2	2	2	0	2	0	0	2	0	2	0	0	0	0	0	2	2	2	2
chr20:48367449-48368779	fixed_Pab-Ppy	1330		2	0	2	2	0	0	2	2	2	2	2	2	2	2	2	2	3	0	2	2	2	2	2	0	2	2	3	0	2	0	1	0	2	2	2	2	2	2	2	2	2	2	2	2	2	2
chr20:50834127-50835855	fixed_Ppa-Ptre-Ptrs-Ptrt-Ptrv	1728		0	3	2	2	2	2	3	0	2	0	0	2	2	2	2	2	2	2	0	3	2	0	2	2	0	0	2	2	0	2	3	3	2	2	0	3	0	2	2	2	2	2	0	2	0	0
chr20:52433253-52434922	fixed_Ppa-Ptre-Ptrs-Ptrt-Ptrv	1669		0	2	2	1	1	2	2	0	2	0	0	2	2	2	2	2	2	2	0	2	2	0	2	1	0	0	2	1	0	2	2	2	2	2	0	2	0	2	1	2	2	2	0	2	0	0
chr20:53198558-53202160	fixed_Gbeg-Ggod-Ggog	3602		2	2	0	0	2	2	0	2	0	2	1	0	0	2	0	0	0	2	2	0	0	2	0	2	2	2	0	1	2	2	0	2	0	0	2	0	2	0	0	0	0	0	2	2	2	2
chr20:55123751-55128346	fixed_Pab-Ppy	4595		2	0	3	2	0	0	2	2	2	2	2	2	2	2	2	2	2	0	2	2	2	2	2	0	2	2	2	0	2	0	2	0	2	1	2	2	2	2	2	2	2	2	2	2	2	2
chr20:55384102-55385170	fixed_Gbeg-Ggod-Ggog	1068	RAE1	2	2	0	0	2	3	0	2	0	2	2	0	0	2	0	0	0	2	2	0	0	2	0	2	2	2	0	2	2	3	0	3	0	0	2	0	2	0	0	0	0	0	2	2	3	3
chr20:58640150-58642331	fixed_Pab-Ppy	2181		1	0	2	2	0	0	2	1	2	1	1	2	2	2	2	2	2	0	1	2	2	2	2	0	1	1	2	0	1	0	2	0	2	2	1	2	2	2	2	2	2	2	1	2	1	1
chr20:58831405-58840928	fixed_Pab-Ppy	9523		2	0	2	2	0	0	3	2	2	2	2	2	2	2	2	2	2	0	2	2	2	2	2	0	2	2	2	0	2	0	2	0	2	2	2	2	2	2	2	2	2	2	2	2	2	2
chr20:59839707-59842986	fixed_Gbeg-Ggod-Ggog	3279	CDH4	2	2	0	0	2	2	0	2	0	2	2	0	0	2	0	0	0	2	2	0	0	2	0	2	2	2	0	2	2	2	0	2	0	0	2	0	2	0	0	0	0	0	2	2	2	2
chr20:61438642-61480185	fixed_Hde	41543	CHRNA4	2	2	2	2	2	2	1	2	2	2	2	2	2	2	2	3	2	2	2	2	2	2	2	2	2	2	2	1	2	1	2	1	2	2	2	2	2	2	2	2	2	2	2	2	2	2
chr21:10186253-10192999	fixed_Pab-Ppy	6746		5	0	37	44	0	0	50	6	45	6	5	40	46	10	43	49	41	0	4	45	43	5	49	0	5	6	38	0	6	0	44	0	40	49	5	46	6	53	46	48	41	43	5	11	6	5
chr21:13557991-13561556	fixed_Ppa	3565		2	2	5	5	2	2	6	0	5	2	2	5	5	5	5	5	6	2	0	6	5	2	5	2	2	2	6	2	2	2	5	2	5	5	0	6	2	6	5	5	6	5	0	5	0	0
chr21:13706238-13724097	fixed_Pab-Ppy	17859		6	0	13	10	0	0	10	3	10	6	5	12	8	8	10	9	13	0	3	10	10	6	12	0	6	6	10	0	7	0	10	0	9	11	3	11	7	13	6	12	13	10	3	8	3	3
chr21:14009949-14018494	fixed_Pab-Ppy	8545		6	0	12	15	0	0	14	5	12	6	5	14	13	12	12	12	15	0	6	13	11	5	9	0	6	5	14	0	6	0	14	0	13	14	4	13	6	12	11	13	14	12	6	7	6	5
chr21:14661641-14663288	fixed_Pab-Ppy	1647		2	0	2	2	0	0	2	2	2	2	2	1	2	2	2	2	2	0	2	2	1	2	2	0	2	2	2	0	2	0	2	0	2	2	2	2	2	2	2	2	2	2	2	2	2	2
chr21:16144671-16149765	fixed_Gbeg-Ggod-Ggog	5094	USP25	2	2	0	0	2	2	0	2	0	2	2	0	0	2	0	0	0	2	2	0	0	2	0	2	2	2	0	2	2	2	0	2	0	0	2	0	2	0	0	0	0	0	2	2	2	2
chr21:16694295-16711084	fixed_Hde	16789	LINC00478	2	2	2	2	2	2	2	2	2	2	2	2	2	2	2	2	2	2	2	2	2	2	2	2	2	2	2	2	2	2	2	2	2	2	2	2	2	2	2	2	2	2	2	2	2	2
chr21:20949843-20952584	fixed_Pab-Ppy	2741		2	0	2	2	0	0	3	0	2	2	1	3	2	2	2	2	1	0	3	2	2	2	2	0	2	2	2	0	2	0	2	0	2	2	2	3	2	2	2	2	2	2	2	2	2	2
chr21:21423398-21432323	fixed_Ppa-Ptre-Ptrs-Ptrt-Ptrv	8925	NCAM2	0	2	2	2	2	2	2	0	2	0	0	2	2	2	2	2	2	2	0	2	2	0	2	2	0	0	1	2	0	2	2	2	1	2	0	2	0	2	2	1	2	2	0	2	0	0
chr21:22313987-22319658	fixed_Gbeg-Ggod-Ggog	5671		1	2	0	0	2	2	0	2	0	2	2	0	0	2	0	0	0	2	2	0	0	2	0	1	2	2	0	2	2	2	0	2	0	0	2	0	1	0	0	0	0	0	2	2	2	2
chr21:22322276-22327232	fixed_Pab-Ppy	4956		2	0	2	2	0	0	2	2	2	2	2	2	2	2	2	2	2	0	2	2	2	2	2	0	2	2	2	0	2	0	2	0	2	2	2	2	2	2	2	2	2	2	2	2	2	2
chr21:22430379-22434404	fixed_Gbeg	4025		2	2	2	2	2	2	2	2	2	2	2	2	2	2	2	2	2	2	2	2	2	2	0	1	2	2	2	1	2	2	2	2	2	2	2	2	1	2	2	2	2	2	2	2	2	2
chr21:22436823-22443679	fixed_Pab-Ppy	6856		2	0	2	2	0	0	2	2	1	2	2	2	1	2	2	1	1	0	2	2	1	2	1	0	2	2	2	0	2	0	3	0	2	1	2	2	2	2	2	2	2	2	2	2	2	2
chr21:22640533-22658881	fixed_Ppa-Ptre-Ptrs-Ptrt-Ptrv	18348		0	2	2	2	1	2	2	0	2	0	0	2	2	2	2	2	2	2	0	2	2	0	2	2	0	0	2	2	0	2	2	2	2	2	0	2	0	2	2	2	2	2	0	2	0	0
chr21:22738479-22742950	fixed_Pab-Ppy	4471		2	0	2	2	0	0	2	2	2	2	1	2	2	1	2	2	1	0	2	2	2	2	2	0	2	2	2	0	2	0	2	0	2	2	2	2	2	2	2	1	2	2	2	2	2	2
chr21:22929384-22930982	fixed_Pab-Ppy	1598		2	0	2	2	0	0	2	2	2	2	2	2	2	2	3	1	2	0	2	3	2	2	2	0	2	2	2	0	2	0	3	0	2	2	2	2	1	2	2	2	2	2	2	2	2	2
chr21:22953831-22959946	fixed_Gbeg-Ggod-Ggog	6115		2	2	0	0	2	2	0	2	0	2	1	0	0	2	0	0	0	1	2	0	0	2	0	2	1	2	0	1	2	2	0	2	0	0	2	0	1	0	0	0	0	0	2	2	2	2
chr21:22971994-22977999	fixed_Pab-Ppy	6005		2	0	2	2	0	0	3	2	2	2	2	2	2	2	2	1	1	0	2	2	2	2	2	0	2	2	2	0	2	0	2	0	2	2	2	2	1	2	2	2	2	2	2	2	2	2
chr21:23360321-23377310	fixed_Ptre-Ptrs-Ptrt-Ptrv	16989		0	2	2	2	2	2	2	2	2	0	0	2	2	2	2	1	2	2	2	2	2	0	2	2	0	0	2	2	0	2	2	2	2	2	2	2	0	2	2	2	2	2	2	2	2	2
chr21:23423597-23457191	fixed_Ppa-Ptre-Ptrs-Ptrt-Ptrv	33594		0	2	2	2	2	2	2	0	2	0	0	2	2	2	2	2	2	2	0	2	2	0	2	2	0	0	2	2	0	2	2	2	2	2	0	2	0	2	2	2	2	2	0	2	0	0
chr21:23460986-23467052	Gbeg-Ggod-Ggog-Ppa-Ptre-Ptrs-Ptrt-Ptrv	6066		0	2	0	0	2	2	0	0	0	0	0	0	0	2	0	0	0	1	0	0	0	0	0	2	0	0	0	2	0	2	0	2	0	0	0	0	0	0	0	0	0	0	0	2	0	0
chr21:23635068-23641120	fixed_Gbeg-Ggod-Ggog	6052		2	2	0	0	2	2	0	2	0	2	2	0	0	2	0	0	0	2	2	0	0	2	0	1	2	2	0	1	2	2	0	2	0	0	2	0	1	0	0	0	0	0	2	2	2	2
chr21:23658909-23682072	fixed_Ppa	23163	D21S2088E	2	2	1	1	2	2	1	0	1	2	1	1	2	2	2	1	2	1	0	2	2	2	2	1	1	2	1	2	2	2	2	2	2	1	0	2	1	2	1	1	1	1	0	2	0	0
chr21:23740230-23741696	fixed_Ppa	1466		2	2	1	2	2	2	2	0	2	2	2	2	2	2	2	1	2	2	0	2	2	2	2	2	2	2	2	1	2	2	2	2	2	2	0	2	2	2	2	2	2	2	0	2	0	0
chr21:23861816-23864600	fixed_Ppa-Ptre-Ptrs-Ptrt-Ptrv	2784		0	2	2	2	2	2	3	0	1	0	0	2	1	2	2	2	2	2	0	2	2	0	2	2	0	0	1	2	0	1	2	1	2	2	0	2	0	2	2	2	2	2	0	1	0	0
chr21:24239732-24275195	fixed_Ppa-Ptre-Ptrs-Ptrt-Ptrv	35463		0	2	2	2	2	2	2	0	2	0	0	2	2	2	2	2	2	2	0	2	2	0	2	2	0	0	2	2	0	2	2	2	2	2	0	2	0	2	2	2	2	2	0	2	0	0
chr21:24287055-24296509	fixed_Ppa-Ptre-Ptrs-Ptrt-Ptrv	9454		0	2	2	2	2	2	2	0	2	0	0	2	2	2	2	1	2	1	0	2	2	0	2	2	0	0	2	2	0	2	2	2	2	2	0	2	0	2	2	2	2	2	0	2	0	0
chr21:24395803-24406875	fixed_Ppa-Ptre-Ptrs-Ptrt-Ptrv	11072		0	2	1	2	1	2	2	0	2	0	0	2	2	2	2	2	2	2	0	2	2	0	2	1	0	0	2	2	0	1	2	2	2	2	0	2	0	2	2	2	2	2	0	2	0	0
chr21:24623611-24629640	fixed_Pab-Ppy	6029		2	0	2	2	0	0	2	2	2	2	2	2	2	2	2	1	2	0	2	2	2	2	2	0	2	2	2	0	2	0	2	0	2	2	2	2	2	2	2	2	2	2	2	2	2	2
chr21:24644189-24652830	fixed_Pab-Ppy	8641		2	0	2	2	0	0	2	2	2	2	2	2	2	2	2	1	2	0	2	2	2	2	2	0	2	2	2	0	2	0	2	0	2	2	2	2	2	2	2	2	2	2	2	2	2	2
chr21:24656140-24715443	Gbeg-Ggod-Ggog-Ppa-Ptre-Ptrs-Ptrt-Ptrv	59303		0	2	0	0	1	2	0	0	0	0	0	0	0	2	0	0	0	2	0	0	0	0	0	1	0	0	0	1	0	2	0	2	0	0	0	0	0	0	0	0	0	0	0	2	0	0
chr21:24839090-24856626	fixed_Gbeg-Ggod-Ggog	17536		2	2	1	0	2	2	0	2	0	2	2	0	1	2	0	0	0	2	2	0	0	2	0	2	2	2	0	2	2	2	0	2	0	0	2	0	2	0	0	0	0	0	2	2	2	2
chr21:24864811-24866883	fixed_Gbeg-Ggod-Ggog	2072		2	1	0	0	2	1	0	2	0	2	2	0	0	2	0	0	0	2	2	0	0	2	0	1	2	2	0	2	2	1	0	2	0	0	2	0	2	0	0	0	0	0	2	2	2	2
chr21:24897649-24901309	fixed_Ptre-Ptrs-Ptrt-Ptrv	3660		0	1	2	2	2	2	2	2	2	0	0	2	2	2	2	2	1	1	2	2	2	0	2	1	0	0	2	1	0	2	2	1	2	1	2	2	0	2	2	2	2	1	2	2	2	2
chr21:25193184-25197498	fixed_Ppa-Ptre-Ptrs-Ptrt-Ptrv	4314	LOC339622	0	2	2	2	2	2	2	0	2	0	0	2	2	2	2	1	2	2	0	2	2	0	2	2	0	0	2	2	0	2	2	2	2	2	0	2	0	2	2	2	2	2	0	2	0	0
chr21:25403902-25406444	fixed_Pab-Ppy	2542		2	0	1	2	0	0	2	2	2	2	2	2	2	2	2	2	2	0	2	2	2	2	2	0	2	2	2	0	2	0	2	0	2	2	2	2	2	2	2	2	2	2	2	2	2	2
chr21:26324275-26327100	fixed_Pab-Ppy	2825	APP	2	0	2	2	0	0	2	2	2	2	2	2	2	2	2	2	2	0	2	2	2	2	2	0	2	2	2	0	2	0	2	0	2	2	2	2	2	2	2	2	2	2	2	2	2	2
chr21:27290308-27291353	fixed_Gbeg-Ggod-Ggog	1045		2	1	0	0	2	1	0	1	0	2	2	0	0	1	0	0	0	1	1	0	0	2	0	1	2	2	0	2	1	1	0	1	0	0	1	0	1	0	0	0	0	0	2	1	1	1
chr21:27744274-27747738	fixed_Pab-Ppy	3464	MIR5009	2	0	2	2	0	0	2	2	2	2	2	2	2	2	2	2	2	0	2	2	2	2	2	0	2	2	2	0	2	0	2	0	2	2	2	2	2	2	2	2	2	2	2	2	2	2
chr21:27903505-27905028	fixed_Ggod	1523	MIR5009	2	2	2	2	2	3	3	2	2	2	2	2	2	2	2	2	2	2	2	2	1	2	2	2	2	2	2	2	2	2	0	2	0	2	2	0	2	2	1	2	2	1	2	2	2	2
chr21:29994179-29997401	fixed_Ppa-Ptre-Ptrs-Ptrt-Ptrv	3222	GRIK1	0	2	2	2	2	2	2	0	2	0	0	2	2	2	2	3	2	2	0	3	2	0	2	2	0	0	2	2	0	2	2	2	2	2	0	3	0	2	2	2	2	2	0	2	0	0
chr21:30192316-30208949	fixed_Ppa-Ptre-Ptrs-Ptrt-Ptrv	16633	GRIK1	0	2	2	2	2	2	2	0	2	0	0	2	2	2	2	2	2	2	0	2	2	0	2	2	0	0	2	2	0	2	2	2	2	2	0	2	0	2	2	2	2	2	0	2	0	0
chr21:30496934-30497739	fixed_Gbeg-Ggod-Ggog	805		2	2	0	0	2	2	0	2	0	2	1	0	0	2	0	0	0	2	2	0	0	2	0	2	1	2	0	2	2	2	0	2	0	0	2	0	2	0	0	0	0	0	2	2	2	2
chr21:30552054-30552554	fixed_Gbeg-Ggod-Ggog	500		2	2	0	0	2	2	0	2	0	2	2	0	0	2	0	0	0	2	2	0	0	2	0	2	3	2	0	2	2	2	0	2	0	0	2	0	2	0	0	0	0	0	2	1	2	2
chr21:30570022-30572650	fixed_Pab-Ppy	2628		2	0	2	2	0	0	2	2	2	2	2	2	2	2	2	2	2	0	2	2	2	2	2	0	2	2	2	0	2	0	2	0	2	2	2	2	2	2	2	2	2	2	2	2	2	2
chr21:30715808-30726908	Gbeg-Ggod-Ggog-Ppa-Ptre-Ptrs-Ptrt-Ptrv	11100	KRTAP13-3,KRTAP13-4	0	2	0	0	2	2	0	0	0	0	0	0	0	2	0	0	0	2	0	0	0	0	0	2	0	0	0	2	0	2	0	2	0	0	0	0	0	0	0	0	0	0	0	2	0	0
chr21:30781816-30783874	fixed_Ppa-Ptre-Ptrs-Ptrt-Ptrv	2058		0	2	2	2	2	2	3	0	2	0	0	2	1	2	2	2	2	2	0	2	2	0	2	2	0	0	1	2	0	2	2	2	2	2	0	2	0	2	2	1	2	2	0	2	0	0
chr21:30833482-30859903	fixed_Ppa-Ptre-Ptrs-Ptrt-Ptrv	26421	KRTAP19-6,KRTAP19-7	0	2	2	2	2	2	2	0	2	0	0	2	2	2	2	1	2	2	0	2	2	0	2	2	0	0	2	2	0	2	2	2	2	2	0	2	0	2	2	2	2	2	0	2	0	0
chr21:31002850-31008289	fixed_Gbeg-Ggod-Ggog	5439		2	2	0	0	2	2	0	2	0	2	2	0	0	2	0	2	0	2	2	0	0	2	0	2	2	2	0	2	2	2	0	2	0	0	2	0	2	0	0	0	0	0	2	2	2	2
chr21:32595760-32599534	fixed_Gbeg-Ggod-Ggog	3774	MRAP	2	2	0	0	2	2	0	2	0	2	2	0	0	2	0	0	0	2	2	0	0	2	0	2	2	2	0	2	2	2	0	2	0	0	2	0	2	0	0	0	0	0	2	2	2	2
chr21:34932015-34935138	fixed_Pab-Ppy	3123		2	0	1	1	0	0	2	2	1	2	1	2	1	2	1	1	1	0	2	1	1	2	1	0	2	2	2	0	2	0	2	0	1	1	2	1	2	1	1	1	2	1	2	2	2	2
chr21:36466436-36470762	fixed_Gbeg-Ggod-Ggog	4326	DOPEY2	2	2	0	0	2	2	0	2	0	2	2	0	0	2	0	0	0	2	2	0	0	2	0	2	2	2	0	2	2	2	0	2	0	0	2	0	2	0	0	0	0	0	2	2	2	2
chr21:36894988-36898458	fixed_Ppa-Ptre-Ptrs-Ptrt-Ptrv	3470		0	2	2	2	2	2	2	0	2	0	0	2	2	2	2	1	2	2	0	2	2	0	2	2	0	0	2	2	0	2	2	2	2	2	0	3	0	2	2	2	2	2	0	2	0	0
chr21:38896547-38898434	Gbeg-Ggod-Ggog-Ppa-Ptre-Ptrs-Ptrt-Ptrv	1887	ERG	0	2	0	0	2	1	0	0	0	0	0	0	0	2	0	0	0	2	0	0	0	0	0	2	0	0	0	2	0	1	0	2	0	0	0	0	0	0	0	0	0	0	0	2	0	0
chr21:40373889-40377366	fixed_Pab-Ppy	3477	DSCAM	2	0	2	2	0	0	2	2	2	2	2	2	2	2	2	2	1	0	2	2	2	2	2	0	2	2	2	0	2	0	2	0	2	2	2	2	2	2	2	2	2	2	2	2	2	2
chr21:40679419-40680419	fixed_Ppa-Ptre-Ptrs-Ptrt-Ptrv	1000	DSCAM	0	1	2	1	2	1	2	0	1	0	0	2	1	1	1	2	1	2	0	1	2	0	1	1	0	0	1	2	0	1	2	1	2	2	0	2	0	1	2	2	2	2	0	1	0	0
chr21:40682725-40686484	fixed_Pab-Ppy	3759	DSCAM	2	0	2	2	0	0	2	2	2	2	2	2	2	2	2	2	2	0	2	2	2	2	2	0	2	2	2	0	2	0	2	0	2	2	2	2	2	2	2	2	2	2	2	2	2	2
chr21:41074066-41076647	fixed_Pab-Ppy	2581	DSCAM	2	0	2	2	0	0	2	2	2	2	2	2	2	1	2	2	1	0	2	2	2	2	2	0	2	2	2	0	2	0	2	0	2	2	2	2	2	2	2	1	2	2	2	1	2	2
chr21:41814930-41815652	fixed_Ppa-Ptre-Ptrs-Ptrt-Ptrv	722		0	2	2	2	1	1	2	0	2	0	0	2	2	2	2	2	3	2	0	2	3	0	2	1	0	0	2	1	0	1	2	2	2	2	0	2	0	3	2	2	2	2	0	2	0	0
chr21:42454128-42464151	fixed_Ppa-Ptre-Ptrs-Ptrt-Ptrv	10023		0	2	2	2	2	2	1	0	2	0	0	2	2	2	2	2	2	2	0	2	2	0	2	2	0	0	2	2	0	2	2	2	2	2	0	2	0	2	2	2	2	2	0	2	0	0
chr21:42625632-42632765	fixed_Ppa-Ptre-Ptrs-Ptrt-Ptrv	7133		0	2	2	2	2	2	2	0	2	0	0	2	2	2	2	2	2	2	0	2	2	0	2	2	0	0	2	2	0	2	2	2	2	2	0	2	0	2	2	2	2	2	0	2	0	0
chr21:44311685-44314396	fixed_Pab-Ppy	2711	TRAPPC10	1	0	2	2	0	0	2	2	2	1	2	2	1	2	2	1	1	0	2	2	2	2	2	0	1	2	2	0	2	0	1	0	2	2	2	1	2	2	2	2	1	1	2	2	1	2
chr21:44546535-44547834	fixed_Ppa-Ptre-Ptrs-Ptrt-Ptrv	1299	PFKL	0	2	2	2	2	1	1	0	2	0	0	2	2	3	2	2	2	2	0	1	2	0	2	1	0	0	2	1	0	1	2	1	2	2	0	1	0	2	2	2	2	2	0	3	0	0
chr21:45189005-45189920	fixed_Pab-Ppy	915	FAM207A	3	0	2	2	0	0	2	3	2	3	2	2	2	2	2	2	2	0	2	2	2	2	2	0	2	2	2	0	2	0	2	0	2	2	2	2	3	2	2	2	3	2	3	2	2	3
chr21:45581016-45582878	fixed_Ppa-Ptre-Ptrs-Ptrt-Ptrv	1862		0	1	1	1	2	1	2	0	2	0	0	2	2	2	2	1	2	2	0	1	2	0	2	2	0	0	2	2	0	2	1	1	2	2	0	1	0	2	2	2	2	2	0	2	0	0
chr21:45708694-45714008	fixed_Pab-Ppy	5314	COL18A1	2	0	1	1	0	0	2	2	1	2	2	2	2	2	1	2	2	0	2	1	2	2	1	0	2	2	1	0	2	0	1	0	2	2	2	1	2	2	1	2	1	2	2	2	2	2
chr22:14430108-14442293	fixed_Ppa	12185		2	4	2	3	4	5	2	0	3	2	2	3	2	4	3	3	2	3	0	3	2	3	3	4	2	2	2	3	4	4	3	3	2	2	0	3	1	2	2	2	2	2	0	7	0	0
chr22:15783363-15820603	fixed_Gbeg-Ggod-Ggog	37240		2	2	0	0	2	3	0	2	0	2	2	0	0	2	0	0	0	2	2	0	0	2	0	2	2	2	0	2	2	3	0	2	0	0	2	0	2	0	0	0	0	0	2	2	2	2
chr22:15884793-15899631	fixed_Pab-Ppy	14838	CECR7	6	0	40	42	0	0	50	6	47	6	5	38	42	9	43	43	39	0	4	44	39	5	48	0	5	6	38	0	6	0	44	0	37	46	5	44	6	50	44	50	39	42	5	10	6	5
chr22:18883617-18889730	Gbeg-Ggod-Ggog-Pab-Ppy	6113		2	0	0	0	0	0	0	2	0	3	2	0	0	4	0	0	0	0	2	0	0	3	0	0	3	3	0	0	2	0	0	0	0	0	1	0	2	0	0	0	0	0	3	2	1	2
chr22:19316904-19332653	Ppa-Ptre-Ptrs-Ptrt-Ptrv-Pab-Ppy	15749		0	0	2	1	0	0	2	0	1	0	0	2	2	2	2	2	2	0	0	2	2	0	2	0	0	0	2	0	0	0	2	0	1	2	0	2	0	2	2	2	2	1	0	2	0	0
chr22:20450785-20451716	fixed_Gbeg-Ggod-Ggog	931	MAPK1	2	2	0	0	2	2	0	3	0	2	2	0	0	3	0	0	0	2	3	0	0	3	0	2	3	2	0	2	2	2	0	2	0	0	2	0	2	0	0	0	0	0	2	2	3	2
chr22:20705529-20710538	fixed_Pab-Ppy	5009		2	0	3	2	0	0	2	2	2	2	2	2	2	2	2	2	2	0	2	2	2	2	2	0	2	2	2	0	2	0	2	0	2	2	2	2	2	2	2	2	2	2	2	2	2	2
chr22:20730643-20764400	fixed_Gbeg-Ggod-Ggog	33757		2	2	0	0	2	2	0	2	0	2	2	0	0	2	0	0	0	2	2	0	0	2	0	2	2	2	0	2	2	2	0	2	0	0	2	0	2	0	0	0	0	0	2	2	2	2
chr22:20862950-20878417	fixed_Ppa-Ptre-Ptrs-Ptrt-Ptrv	15467		0	2	2	2	2	2	2	0	2	0	0	2	2	2	2	2	2	2	0	2	2	0	2	2	0	0	2	2	0	2	2	2	2	2	0	2	0	2	2	2	2	2	0	2	0	0
chr22:21014383-21029352	fixed_Pab	14969		2	0	2	2	2	0	2	3	2	2	1	2	2	2	2	2	2	1	3	2	2	0	2	1	2	2	2	2	2	1	2	0	2	2	2	2	2	2	2	2	2	2	2	2	2	2
chr22:21091968-21092941	fixed_Pab	973		4	0	2	1	2	0	1	3	1	1	1	1	1	4	1	1	1	1	3	1	1	2	1	1	1	1	1	1	1	1	1	0	1	1	3	1	1	1	2	2	1	1	3	2	3	3
chr22:21150970-21162831	fixed_Pab-Ppy	11861		2	0	2	2	0	0	2	2	2	2	1	2	2	2	2	2	2	0	2	2	2	2	2	0	2	2	2	0	2	0	2	0	2	2	2	2	2	2	2	2	2	2	2	2	2	2
chr22:21226378-21228108	fixed_Ppa-Ptre-Ptrs-Ptrt-Ptrv	1730	PRAME	0	2	2	2	2	2	3	0	2	0	0	2	2	2	2	3	2	2	0	2	2	0	2	2	0	0	2	2	0	2	2	2	2	2	0	2	0	2	2	2	3	2	0	2	0	0
chr22:21529526-21550017	fixed_Pab-Ppy	20491		2	0	2	3	0	0	2	2	2	2	2	2	2	2	2	2	2	0	3	2	2	2	2	0	2	2	2	0	2	0	3	0	2	2	3	2	2	2	2	2	2	2	2	1	3	2
chr22:21592333-21596165	fixed_Hde	3832		2	2	2	2	2	2	2	2	2	2	2	2	2	2	2	2	2	2	2	2	2	2	2	2	2	2	2	2	2	2	2	2	2	2	2	2	2	2	2	3	2	2	2	2	2	2
chr22:21615290-21616846	fixed_Ptre-Ptrs-Ptrt-Ptrv	1556		0	2	2	2	2	2	2	2	2	0	0	2	2	2	2	2	2	2	2	2	2	0	2	2	0	0	2	2	0	2	2	2	2	2	2	2	0	2	2	2	2	2	2	2	2	2
chr22:22702442-22720810	fixed_Hde	18368	LOC391322,GSTT1,GSTTP2	2	2	2	3	2	2	2	2	2	2	2	2	2	0	2	2	2	2	2	2	2	2	2	2	2	2	2	2	2	2	2	2	2	2	2	2	2	2	2	2	3	2	2	1	2	2
chr22:22856901-22859790	fixed_Ptre-Ptrs-Ptrt-Ptrv	2889	CABIN1	0	3	2	3	3	3	2	2	2	0	0	3	2	2	2	2	3	3	2	2	3	0	2	3	0	0	2	3	0	3	3	3	2	2	2	1	0	2	2	2	2	2	2	2	2	2
chr22:27563929-27570180	fixed_Ppa	6251		2	2	2	1	2	2	1	0	2	2	1	2	2	2	2	2	2	2	0	2	2	1	2	2	1	1	2	2	2	2	2	2	2	2	0	1	1	2	2	2	2	2	0	2	0	0
chr22:27734292-27735690	fixed_Pab-Ppy	1398	ZNRF3	2	0	2	2	0	0	2	2	2	2	2	2	2	2	2	2	2	0	2	2	2	2	2	0	2	2	2	0	2	0	2	0	2	2	2	2	2	2	3	2	2	2	2	2	2	2
chr22:28152805-28163350	fixed_Ppa-Ptre-Ptrs-Ptrt-Ptrv	10545	RFPL1-AS1	0	4	2	2	5	5	2	0	3	0	0	2	2	2	2	2	2	4	0	2	2	0	2	7	0	0	2	6	0	6	2	5	2	2	0	2	0	2	2	3	2	3	0	2	0	0
chr22:29174218-29181599	fixed_Ppa-Ptre-Ptrs-Ptrt-Ptrv	7381		0	2	2	2	2	2	2	0	2	0	0	2	2	2	2	2	1	2	0	1	2	0	2	2	0	0	2	2	0	2	2	2	2	2	0	1	0	2	2	2	2	2	0	2	0	0
chr22:29353817-29354987	fixed_Gbeg-Ggod-Ggog	1170		1	1	0	0	1	2	0	1	0	2	1	0	0	2	0	0	0	1	2	0	0	1	0	1	1	2	0	1	1	1	0	1	0	0	1	0	2	0	0	0	0	0	1	2	2	2
chr22:31860164-31862892	fixed_Pab-Ppy	2728		2	0	2	0	0	0	2	2	1	2	1	2	2	2	1	2	2	0	2	1	1	2	2	0	2	2	2	0	2	0	2	0	2	2	2	1	2	1	2	2	1	3	2	2	2	2
chr22:31879669-31890097	fixed_Pab-Ppy	10428		2	0	2	2	0	0	2	2	2	2	2	2	2	2	2	2	2	0	2	2	2	2	2	0	2	2	2	0	2	0	2	0	2	2	2	2	2	2	2	2	2	2	2	2	2	2
chr22:32014703-32015803	fixed_Pab-Ppy	1100	LARGE	2	0	2	2	0	0	2	2	2	2	1	2	2	2	2	2	1	0	2	1	2	2	1	0	2	2	2	0	2	0	2	0	2	1	2	1	2	2	2	2	2	2	2	2	2	2
chr22:33264403-33265045	fixed_Pab-Ppy	642		1	0	2	2	0	0	3	2	2	2	1	3	2	2	2	3	2	0	2	2	3	1	2	0	1	2	2	0	2	0	3	0	2	3	2	2	2	2	2	2	2	3	1	2	2	2
chr22:34326814-34328763	fixed_Ppa-Ptre-Ptrs-Ptrt-Ptrv	1949		0	2	2	2	2	2	2	0	2	0	0	2	2	2	2	3	2	3	0	2	2	0	2	2	0	0	2	2	0	3	2	2	2	2	0	2	0	2	2	2	2	2	0	2	0	0
chr22:34551298-34555611	fixed_Pab-Ppy	4313	RBFOX2	2	0	2	2	0	0	2	2	2	2	2	2	2	2	2	1	1	0	2	2	2	2	2	0	2	2	2	0	2	0	2	0	1	2	2	2	2	2	2	2	2	2	2	2	2	2
chr22:34809351-34811668	fixed_Gbeg-Ggod-Ggog	2317		2	2	0	0	2	2	0	2	0	2	2	0	0	2	0	0	0	2	2	0	0	2	0	2	2	2	0	2	2	2	0	2	0	0	2	0	2	0	0	0	0	0	2	2	2	2
chr22:34851183-34857597	fixed_Ppa-Ptre-Ptrs-Ptrt-Ptrv	6414		0	2	2	2	2	2	2	0	2	0	0	2	2	2	2	2	2	2	0	2	2	0	2	2	0	0	2	2	0	2	2	2	2	2	0	2	0	2	2	2	2	2	0	2	0	0
chr22:34902449-34905204	fixed_Ppa-Ptre-Ptrs-Ptrt-Ptrv	2755		0	2	2	2	2	2	2	0	2	0	0	2	2	2	2	2	2	2	0	2	2	0	2	2	0	0	2	2	0	2	2	2	2	2	0	2	0	2	2	2	2	2	0	2	0	0
chr22:34930676-34947853	fixed_Ppa-Ptre-Ptrs-Ptrt-Ptrv	17177	APOL4	0	2	2	2	2	2	2	0	2	0	0	2	2	3	2	2	3	2	0	2	2	0	2	2	0	0	2	2	0	2	2	2	2	2	0	2	0	2	2	2	2	2	0	2	0	0
chr22:37401715-37405784	fixed_Gbeg-Ggod-Ggog	4069		2	1	0	0	1	2	0	2	0	2	2	0	0	2	0	0	0	2	2	0	0	2	0	1	2	2	0	1	2	1	0	2	0	0	2	0	2	0	0	0	0	0	2	2	2	1
chr22:43829332-43831059	fixed_Gbeg-Ggod-Ggog	1727		2	2	0	0	1	1	0	2	0	2	2	0	0	2	0	0	0	1	2	0	0	2	0	1	2	2	0	1	2	1	0	2	0	0	2	0	2	0	0	0	0	0	1	2	2	2
chr22:43908546-43919469	fixed_Ppa-Ptre-Ptrs-Ptrt-Ptrv	10923	LOC100506714	0	2	2	2	2	2	2	0	2	0	0	2	1	2	2	2	2	2	0	1	2	0	2	2	0	0	2	2	0	2	2	2	2	2	0	2	0	2	2	2	2	2	0	2	0	0
chr22:45578106-45578606	fixed_Ptre-Ptrs-Ptrt-Ptrv	500	TBC1D22A	0	2	2	1	2	2	2	2	2	0	0	2	2	1	2	2	1	2	1	1	1	0	2	2	0	0	2	2	0	2	2	3	2	1	2	2	0	2	2	2	2	2	2	2	2	2
chr22:45772910-45777338	fixed_Gbeg-Ggod-Ggog	4428	TBC1D22A	2	2	0	0	2	1	0	2	0	2	2	0	0	2	0	0	0	2	2	0	0	2	0	2	2	2	0	2	2	1	0	2	0	0	2	0	2	0	0	0	0	0	2	2	2	2
chr22:46503391-46504200	fixed_Ppa-Ptre-Ptrs-Ptrt-Ptrv	809		0	2	1	1	2	2	1	0	1	0	0	2	2	2	1	3	1	3	0	1	1	0	1	2	0	0	2	2	0	2	1	2	1	1	0	2	0	1	1	2	1	1	0	2	0	0
chr22:46835248-46836575	fixed_Ppa-Ptre-Ptrs-Ptrt-Ptrv	1327		0	2	2	2	2	2	1	0	2	0	0	1	1	2	2	2	1	2	0	2	2	0	1	2	0	0	2	2	0	2	1	2	2	2	0	2	0	2	2	2	2	2	0	2	0	0
chr22:47775210-47777750	fixed_Ppa-Ptre-Ptrs-Ptrt-Ptrv	2540		0	2	2	3	2	2	3	0	2	0	0	2	2	2	2	3	2	2	0	2	2	0	2	2	0	0	3	2	0	2	3	2	2	2	0	2	0	2	2	2	2	1	0	2	0	0
chr22:47950603-47958294	fixed_Ppa	7691		2	2	10	8	2	2	5	0	9	2	2	6	8	2	8	6	8	2	0	7	6	2	10	2	2	2	9	2	2	2	12	2	9	6	0	9	2	8	8	8	8	6	0	2	0	0
chr22:47991802-47994643	fixed_Ppa-Ptre-Ptrs-Ptrt-Ptrv	2841		0	2	8	6	1	2	4	0	7	0	0	6	6	2	7	11	6	2	0	6	8	0	9	2	0	0	8	2	0	2	8	2	8	7	0	8	0	8	9	7	8	6	0	2	0	0
chr22:48148071-48152280	fixed_Pab-Ppy	4209		2	0	2	1	0	0	1	2	2	2	2	2	2	2	2	2	2	0	1	1	2	2	2	0	2	2	2	0	2	0	1	0	2	2	2	1	2	2	2	2	2	2	2	2	1	2
chr22:48195277-48207481	fixed_Ppa-Ptre-Ptrs-Ptrt-Ptrv	12204		0	2	2	2	2	2	1	0	2	0	0	2	2	2	2	2	2	2	0	2	2	0	2	2	0	0	2	2	0	2	2	2	2	2	0	1	0	2	2	2	2	2	0	2	0	0
chr22:48451046-48458006	fixed_Ptre-Ptrs-Ptrt-Ptrv	6960		0	1	2	1	2	2	1	2	2	0	0	2	2	2	1	2	2	2	2	2	2	0	2	2	0	0	2	2	0	1	2	1	2	2	1	1	0	2	2	2	2	2	2	2	1	1
chr22:48458006-48465056	fixed_Ppa-Ptre-Ptrs-Ptrt-Ptrv	7050		0	2	2	1	2	2	1	0	2	0	0	2	2	2	2	2	2	2	0	2	2	0	2	2	0	0	1	2	0	1	2	2	2	2	0	2	0	2	2	1	2	2	0	2	0	0
chr3:822519-851237	fixed_Ppa-Ptre-Ptrs-Ptrt-Ptrv	28718		0	2	2	2	1	2	2	0	2	0	0	2	2	2	2	1	2	1	0	2	2	0	2	1	0	0	2	2	0	1	2	2	2	2	0	2	0	2	2	2	2	2	0	2	0	0
chr3:1660536-1662025	fixed_Pab-Ppy	1489		2	0	2	2	0	0	2	2	2	2	1	2	2	2	2	2	1	0	2	2	2	2	2	0	2	2	2	0	2	0	2	0	2	2	2	2	2	2	2	2	2	2	2	2	2	2
chr3:2893865-2896674	fixed_Gbeg-Ggod-Ggog	2809	CNTN4	2	2	0	0	2	2	0	2	0	2	2	0	0	2	0	0	0	2	2	0	0	2	0	2	2	2	0	2	2	2	0	2	0	0	2	0	2	0	0	0	0	0	2	2	2	2
chr3:4124287-4130813	fixed_Ptre-Ptrs-Ptrt-Ptrv	6526		0	2	2	2	1	2	2	2	2	0	0	2	2	2	2	2	2	2	2	2	2	0	2	2	0	0	2	2	0	2	2	2	2	2	2	2	0	2	2	2	2	2	2	2	2	2
chr3:4651333-4654606	fixed_Pab-Ppy	3273	ITPR1	2	0	2	2	0	0	2	2	2	2	1	2	2	2	2	2	2	0	2	2	2	2	2	0	2	2	2	0	2	0	2	0	2	2	2	2	2	2	2	2	2	2	2	2	2	2
chr3:5332700-5334207	fixed_Pab-Ppy	1507		2	0	2	2	0	0	2	2	2	1	1	2	2	2	2	2	2	0	2	2	2	2	2	0	2	2	2	0	2	0	2	0	2	2	2	2	2	2	2	2	1	2	1	2	2	2
chr3:5573184-5573684	fixed_Ppa	500		1	1	1	1	1	1	1	0	1	1	1	2	1	2	1	2	1	1	0	1	2	1	1	2	2	1	1	2	1	1	1	1	2	1	0	2	2	1	2	2	2	1	0	2	0	0
chr3:7159906-7162034	fixed_Gbeg-Ggod-Ggog	2128	GRM7	2	2	0	0	2	2	0	2	0	2	2	0	0	2	0	0	0	2	2	0	0	2	0	1	2	2	0	2	2	2	0	2	0	0	2	0	2	0	0	0	0	0	2	2	2	2
chr3:7798035-7802455	fixed_Pab-Ppy	4420		1	0	2	2	0	0	2	2	2	2	2	2	2	2	2	2	2	0	1	2	2	2	2	0	2	2	2	0	1	0	2	0	2	2	2	3	2	2	2	2	1	2	2	2	2	2
chr3:7805848-7814638	fixed_Pab-Ppy	8790		2	0	2	2	0	0	2	2	2	2	2	2	2	2	2	2	2	0	2	2	2	2	2	0	2	2	2	0	2	0	2	0	2	2	2	2	2	2	2	2	2	2	2	2	2	2
chr3:11728409-11729964	fixed_Pab-Ppy	1555	VGLL4	2	0	2	2	0	0	2	2	2	2	2	2	2	2	2	3	2	0	2	2	2	2	2	0	2	2	2	0	2	0	2	0	2	2	2	2	2	2	2	2	2	2	2	2	2	2
chr3:12526596-12528436	fixed_Ppa-Ptre-Ptrs-Ptrt-Ptrv	1840	TSEN2	0	2	2	2	2	2	2	0	2	0	0	2	2	2	1	1	1	1	0	2	1	0	2	2	0	0	2	1	0	2	2	2	2	2	0	2	0	2	2	2	2	1	0	2	0	0
chr3:13324943-13331259	fixed_Pab-Ppy	6316		2	0	2	2	0	0	2	2	2	2	2	2	2	2	2	2	3	0	3	2	2	2	2	0	2	2	2	0	2	0	2	0	2	2	2	2	2	2	2	2	2	2	2	2	2	2
chr3:15181606-15202206	fixed_Gbeg-Ggod-Ggog	20600	COL6A4P1	2	2	0	0	2	2	0	2	0	2	2	0	0	2	0	0	0	2	2	0	0	2	0	2	2	2	0	2	2	2	0	2	0	0	2	0	2	0	0	0	0	0	2	2	2	2
chr3:16627413-16631436	fixed_Hde	4023		3	2	2	3	6	2	2	2	3	4	2	2	2	3	2	3	2	2	2	2	2	2	3	2	4	3	3	6	2	10	2	2	2	2	2	2	2	2	2	2	3	2	3	3	3	2
chr3:18641932-18646165	fixed_Pab-Ppy	4233		2	0	1	2	0	0	2	2	2	2	2	2	2	1	2	2	2	0	2	2	2	2	2	0	2	2	2	0	1	0	2	0	2	2	2	2	2	2	2	2	2	2	2	2	2	2
chr3:19767676-19782217	fixed_Pab-Ppy	14541		2	0	2	2	0	0	2	2	2	2	2	2	2	2	2	2	2	0	2	2	2	2	2	0	2	2	2	0	2	0	2	0	2	2	2	2	2	2	2	2	2	2	2	2	2	2
chr3:22022981-22027672	fixed_Ppy	4691		1	1	2	2	0	2	2	2	2	2	1	2	2	2	2	2	2	0	2	2	2	2	2	0	2	2	2	0	2	0	2	2	2	2	2	2	1	2	2	2	2	2	2	2	2	2
chr3:22060842-22063436	fixed_Hde	2594		2	2	1	2	1	2	2	2	1	2	1	2	2	2	2	1	2	1	2	2	1	2	2	1	2	2	1	1	1	1	2	2	2	2	2	2	2	2	2	2	2	2	2	2	1	2
chr3:22112145-22114794	fixed_Gbeg-Ggod-Ggog	2649		2	2	0	0	1	2	0	2	0	2	1	0	0	2	0	0	0	1	2	0	0	2	0	2	2	2	0	2	2	2	0	2	0	0	2	0	2	0	0	0	0	0	2	2	2	2
chr3:22354332-22354937	fixed_Ptre-Ptrs-Ptrt-Ptrv	605		0	2	2	2	1	2	2	2	2	0	0	2	2	2	2	2	3	1	2	2	3	0	2	2	0	0	1	1	0	2	2	2	2	2	2	2	0	2	2	2	2	2	2	2	2	2
chr3:22809910-22813784	fixed_Pab-Ppy	3874		2	0	2	2	0	0	2	2	2	2	2	2	2	2	2	2	2	0	2	2	2	2	2	0	2	2	2	0	1	0	2	0	2	2	2	2	2	2	2	2	2	2	2	2	2	2
chr3:27128650-27130284	fixed_Ppa-Ptre-Ptrs-Ptrt-Ptrv	1634		0	2	2	2	2	2	2	0	1	0	0	1	2	2	2	2	2	2	0	2	2	0	2	2	0	0	1	2	0	2	2	2	2	2	0	1	0	2	1	2	0	2	0	2	0	0
chr3:28376270-28403001	fixed_Gbeg-Ggod-Ggog	26731		2	2	0	0	2	2	0	2	0	2	2	0	0	2	0	0	0	2	2	0	0	2	0	2	2	2	0	2	2	2	0	2	0	0	2	0	2	0	0	0	0	0	2	2	2	2
chr3:28790761-28791261	fixed_Gbeg-Ggod-Ggog	500		3	2	0	0	2	2	0	2	0	2	2	0	0	2	0	0	0	1	2	0	0	2	0	2	2	2	0	1	2	2	0	2	0	0	2	0	2	0	0	0	0	0	2	2	2	3
chr3:29094140-29099018	fixed_Pab-Ppy	4878		2	0	2	2	0	0	2	2	2	2	2	2	2	2	2	2	2	0	2	2	2	2	2	0	2	2	2	0	2	0	2	0	2	2	2	2	2	2	2	2	2	2	3	2	2	2
chr3:30733975-30736236	fixed_Gbeg-Ggod-Ggog	2261		2	2	0	0	2	2	0	2	0	2	2	0	0	2	0	0	0	2	2	0	0	2	0	1	2	2	0	2	1	2	0	2	0	0	2	0	2	0	0	0	0	0	2	2	2	2
chr3:30831852-30835740	fixed_Gbeg-Ggod-Ggog	3888	GADL1	2	2	0	0	2	2	0	2	0	2	1	0	0	2	0	0	0	2	2	0	0	2	0	1	2	2	0	1	1	2	0	2	0	0	2	0	1	0	0	0	0	0	2	2	2	2
chr3:31389674-31392402	fixed_Ppa-Ptre-Ptrs-Ptrt-Ptrv	2728		0	2	2	2	1	2	2	0	2	0	0	2	2	2	2	2	2	2	0	2	2	0	2	2	0	0	2	2	0	2	2	2	2	2	0	2	0	2	2	2	2	2	0	2	0	0
chr3:31398092-31398592	fixed_Ppa	500		2	2	2	2	1	2	2	0	2	2	2	2	2	1	2	2	2	1	0	2	1	2	2	2	2	2	1	2	2	2	2	2	2	2	0	1	1	2	2	2	2	2	0	2	0	0
chr3:32397025-32406532	fixed_Pab-Ppy	9507		2	0	2	2	0	0	2	2	2	2	2	2	2	2	2	2	2	0	2	2	2	2	2	0	2	2	2	0	2	0	2	0	2	2	2	2	2	3	2	2	2	2	2	2	2	2
chr3:35813281-35814027	fixed_Gbeg-Ggod-Ggog	746		2	2	0	0	3	2	0	2	0	2	2	0	0	2	0	0	0	2	2	0	0	2	0	2	2	2	0	3	2	2	0	2	0	0	2	0	1	0	0	0	0	0	2	2	2	2
chr3:36007802-36031125	fixed_Ppa-Ptre-Ptrs-Ptrt-Ptrv	23323		0	2	2	2	2	2	2	0	2	0	0	2	2	2	2	2	2	1	0	2	2	0	2	2	0	0	2	2	0	2	2	2	2	2	0	2	0	2	2	2	2	2	0	2	0	0
chr3:36115483-36123448	fixed_Hde	7965		2	2	1	2	2	2	2	2	2	2	2	2	2	2	2	2	2	2	2	2	2	2	2	2	2	2	2	2	2	2	2	2	2	2	2	2	1	2	2	2	2	2	2	2	2	2
chr3:37401728-37407702	fixed_Ppa-Ptre-Ptrs-Ptrt-Ptrv	5974		0	2	2	2	2	2	2	0	2	0	0	2	2	2	2	2	2	2	0	2	3	0	2	2	0	0	2	3	0	2	2	2	2	2	0	2	0	2	2	2	2	2	0	2	0	0
chr3:39306049-39314412	fixed_Gbeg-Ggod-Ggog	8363		2	3	0	0	2	2	0	3	0	2	2	0	0	2	0	0	0	2	3	0	0	2	0	2	2	2	0	2	2	3	0	2	0	0	2	0	2	0	0	0	0	0	3	2	2	2
chr3:39803700-39804991	fixed_Ptre-Ptrs-Ptrt-Ptrv	1291		0	2	2	2	2	2	2	2	2	0	0	2	2	2	2	3	2	2	2	2	2	0	2	2	0	0	2	2	0	2	2	2	1	2	2	2	0	2	2	2	2	2	2	2	2	2
chr3:42317603-42322643	fixed_Ppa-Ptre-Ptrs-Ptrt-Ptrv	5040		0	1	2	2	1	1	1	0	2	0	0	2	2	2	2	2	2	1	0	2	2	0	2	1	0	0	2	1	0	1	2	1	2	2	0	2	0	2	2	2	2	2	0	2	0	0
chr3:43089719-43092259	fixed_Ppa-Ptre-Ptrs-Ptrt-Ptrv	2540		0	2	2	3	2	2	2	0	2	0	0	2	2	2	3	3	3	2	0	2	2	0	2	2	0	0	2	2	0	2	3	2	3	2	0	3	0	3	2	3	2	2	0	2	0	0
chr3:45211597-45217618	fixed_Gbeg-Ggod-Ggog	6021		2	2	0	0	2	2	0	2	0	2	2	0	0	2	0	0	0	2	2	0	0	2	0	2	2	2	0	2	2	2	0	2	0	0	2	0	2	0	0	0	0	0	2	2	2	2
chr3:46528554-46532832	fixed_Pab-Ppy	4278	LRRC2	2	0	2	2	0	0	2	2	2	2	2	2	2	2	2	2	2	0	1	2	2	2	2	0	2	2	2	0	1	0	2	0	2	2	2	2	2	2	2	2	2	2	2	2	2	2
chr3:48042811-48043918	fixed_Gbeg-Ggod-Ggog	1107	MAP4	2	2	0	0	2	2	0	2	0	2	2	0	0	3	0	0	0	2	2	0	0	2	0	2	2	2	0	2	3	2	0	1	0	0	2	0	2	0	0	0	0	0	2	2	2	2
chr3:51010105-51011891	fixed_Gbeg-Ggod-Ggog	1786	DOCK3	2	2	0	0	2	2	0	2	0	2	2	0	0	2	0	0	0	2	2	0	0	2	0	2	1	2	0	2	2	2	0	2	0	0	2	0	2	0	0	0	0	0	1	2	2	2
chr3:52106581-52114390	fixed_Hde	7809	POC1A	2	3	2	2	2	2	2	3	2	2	2	2	2	2	2	2	3	2	3	2	2	2	2	2	2	2	2	2	2	3	2	3	2	2	2	2	2	2	2	2	2	2	2	2	3	3
chr3:56583065-56595191	fixed_Ppa-Ptre-Ptrs-Ptrt-Ptrv	12126	CCDC66	0	2	2	2	2	2	2	0	2	0	0	2	2	2	2	1	2	2	0	2	2	0	2	2	0	0	1	2	0	2	2	2	2	2	0	2	0	2	2	1	2	2	0	2	0	0
chr3:59072767-59077860	fixed_Ppa-Ptre-Ptrs-Ptrt-Ptrv	5093		0	2	2	2	2	2	2	0	2	0	0	2	2	2	2	2	2	2	0	2	2	0	2	2	0	0	2	2	0	2	2	2	2	2	0	2	0	2	2	2	2	2	0	2	0	0
chr3:62051006-62052460	fixed_Ppa	1454	PTPRG	2	1	2	1	2	2	2	0	2	2	2	2	2	2	2	2	2	1	0	2	2	2	2	2	2	1	2	2	2	2	2	2	2	2	0	2	2	2	2	2	2	2	0	2	0	0
chr3:63106143-63110774	fixed_Hde	4631		2	2	2	2	2	2	2	2	2	2	2	2	2	2	2	2	2	2	2	2	2	2	2	2	2	2	2	2	2	2	2	2	2	2	2	2	2	2	2	2	2	2	2	2	2	2
chr3:63718806-63721846	fixed_Ppa-Ptre-Ptrs-Ptrt-Ptrv	3040		0	2	2	2	2	2	2	0	2	0	0	2	2	2	2	2	2	2	0	2	2	0	2	2	0	0	2	2	0	2	2	2	2	2	0	2	0	2	2	2	2	2	0	2	0	0
chr3:65649782-65655414	fixed_Gbeg-Ggod-Ggog	5632	MAGI1	2	2	0	0	2	2	0	2	0	2	2	0	0	2	0	0	0	2	2	0	0	2	0	2	2	2	0	2	2	2	0	2	0	0	2	0	2	0	0	0	0	0	2	2	2	2
chr3:69410825-69412182	fixed_Gbeg-Ggod-Ggog	1357	FRMD4B	2	2	0	0	2	2	0	2	0	2	2	0	0	2	0	0	0	2	2	0	0	2	0	2	2	2	0	2	1	2	0	2	0	0	2	0	2	0	0	0	0	0	2	2	2	2
chr3:72885098-72888457	fixed_Gbeg-Ggod-Ggog	3359	SHQ1	2	2	0	0	2	2	0	2	0	2	2	0	0	2	0	0	0	2	2	0	0	2	0	2	2	2	0	3	2	2	0	2	0	0	2	0	2	0	0	0	0	0	2	2	2	2
chr3:73593240-73595035	fixed_Pab-Ppy	1795	PDZRN3	2	0	2	2	0	0	2	2	2	2	2	2	2	2	2	2	2	0	2	2	2	2	2	0	2	2	2	0	2	0	2	0	2	1	2	2	2	2	2	2	2	2	2	2	2	2
chr3:74171226-74174202	fixed_Hde	2976		2	1	2	2	2	2	2	2	2	2	2	2	2	2	2	2	2	2	2	2	2	2	2	2	2	2	2	1	2	2	2	2	2	2	2	2	2	2	3	2	2	2	2	2	2	2
chr3:76057411-76061162	fixed_Pab-Ppy	3751		3	0	6	4	0	0	5	3	5	4	3	5	5	3	5	4	5	0	3	5	5	4	5	0	4	3	5	0	4	0	6	0	5	5	3	5	3	5	5	6	5	5	4	2	4	3
chr3:76107981-76111152	fixed_Pab-Ppy	3171		2	0	2	2	0	0	2	2	2	2	2	2	2	2	2	2	2	0	2	2	2	2	2	0	2	2	2	0	2	0	2	0	2	2	2	2	1	2	1	2	2	2	2	2	2	2
chr3:76129734-76141557	fixed_Pab-Ppy	11823		2	0	2	2	0	0	2	2	2	2	1	2	2	2	2	1	2	0	2	2	2	2	2	0	1	2	2	0	2	0	2	0	2	2	2	2	2	2	2	2	2	2	2	2	2	2
chr3:76225746-76227516	fixed_Pab-Ppy	1770		2	0	2	2	0	0	2	2	2	2	2	2	2	2	2	2	2	0	2	2	2	2	2	0	2	3	2	0	2	0	2	0	2	2	2	2	2	2	2	2	2	2	2	1	2	2
chr3:76466318-76469401	fixed_Pab-Ppy	3083		2	0	2	2	0	0	2	2	2	2	2	1	2	1	2	2	1	0	2	2	2	2	2	0	1	2	1	0	2	0	2	0	2	1	2	2	2	1	2	2	1	2	2	2	2	2
chr3:78173866-78175130	fixed_Gbeg-Ggod-Ggog	1264		2	1	0	0	1	2	0	2	0	2	1	0	0	1	0	0	0	2	2	0	0	2	0	1	2	2	0	2	2	1	0	1	0	0	2	0	2	0	0	0	0	0	2	2	2	2
chr3:78213055-78214771	fixed_Gbeg-Ggod-Ggog	1716		2	2	0	0	2	2	0	2	0	2	1	0	0	1	0	0	0	2	2	0	0	2	0	2	2	2	0	2	2	2	0	2	0	0	2	0	2	0	0	0	0	0	2	2	2	2
chr3:78931816-78932316	fixed_Pab-Ppy	500	ROBO1	2	0	2	2	0	0	2	2	2	2	1	2	2	2	1	2	2	0	2	2	2	1	2	0	1	2	1	0	2	0	2	0	2	2	2	2	1	2	2	2	2	2	1	2	1	2
chr3:79072765-79075169	fixed_Gbeg-Ggod-Ggog	2404	ROBO1	2	2	0	0	2	3	0	3	0	2	2	0	0	2	0	0	0	2	2	0	0	2	0	2	2	2	0	2	3	2	0	3	0	0	2	0	2	0	0	0	0	0	2	2	2	2
chr3:79979329-79982333	fixed_Gbeg-Ggod-Ggog	3004		2	1	0	0	2	1	0	2	0	2	1	0	0	2	0	0	0	2	2	0	0	2	0	1	2	2	0	2	1	2	0	2	0	0	2	0	2	0	0	0	0	0	2	2	2	2
chr3:80036447-80037897	fixed_Gbeg-Ggod-Ggog	1450		2	2	0	0	2	2	0	2	0	2	2	0	0	2	0	1	0	2	2	0	0	2	0	2	1	2	0	2	2	2	0	2	0	0	2	0	3	0	0	0	0	0	2	2	2	2
chr3:80980875-80982539	fixed_Gbeg-Ggod-Ggog	1664		2	2	0	0	2	2	0	2	0	2	1	0	0	2	0	0	0	2	2	0	0	2	0	2	1	2	0	2	1	2	0	2	0	0	2	0	1	0	0	0	0	0	1	2	2	2
chr3:81455686-81460570	fixed_Pab-Ppy	4884		2	0	2	2	0	0	2	2	2	2	2	2	2	2	2	2	2	0	2	3	2	2	2	0	2	2	2	0	2	0	2	0	2	2	2	2	2	2	2	2	2	2	2	2	2	2
chr3:83148046-83149750	fixed_Gbeg-Ggod-Ggog	1704		2	2	0	0	2	2	0	2	0	2	2	0	0	2	0	0	0	2	2	0	0	2	0	2	2	2	0	2	1	2	0	2	0	0	2	0	2	0	0	0	0	0	2	2	2	2
chr3:85039307-85042312	fixed_Pab-Ppy	3005		2	0	2	2	0	0	2	2	2	2	2	2	2	2	2	2	2	0	2	2	2	2	2	0	2	2	2	0	2	0	2	0	2	2	2	2	2	2	2	2	2	2	2	2	2	2
chr3:85489602-85491609	fixed_Gbeg-Ggod-Ggog	2007	CADM2	2	2	0	0	1	2	0	2	0	2	2	0	0	2	0	0	1	2	2	0	0	2	0	2	3	2	0	1	2	2	0	2	0	0	2	0	2	0	0	0	0	0	2	2	2	2
chr3:85648664-85649523	fixed_Pab-Ppy	859	CADM2	2	0	2	2	0	0	2	2	2	2	2	2	2	2	2	1	1	0	2	2	1	2	2	0	1	1	1	0	2	0	2	0	2	2	2	2	1	2	2	2	1	2	2	2	2	2
chr3:86933617-86935003	fixed_Gbeg-Ggod-Ggog	1386		2	2	0	0	2	2	0	2	0	2	1	0	0	2	0	0	0	2	2	0	0	2	0	1	2	2	0	2	1	2	0	2	0	0	2	0	1	0	0	0	0	0	2	2	1	2
chr3:86974552-86975648	fixed_Pab-Ppy	1096		2	0	2	1	0	0	2	2	2	2	2	2	2	2	1	1	2	0	2	2	2	2	2	0	2	2	2	0	2	0	2	0	2	2	2	2	1	2	2	2	2	2	2	2	2	2
chr3:87261717-87262696	fixed_Pab-Ppy	979		3	0	2	1	0	0	2	2	2	1	1	2	2	2	2	1	2	0	2	2	2	1	2	0	2	2	1	0	2	0	2	0	2	2	2	2	1	2	2	1	2	1	1	2	2	2
chr3:87527397-87541543	fixed_Pab-Ppy	14146		2	0	2	2	0	0	2	2	2	2	2	2	2	2	2	2	2	0	2	2	2	2	2	0	2	2	2	0	2	0	2	0	2	2	2	2	2	2	2	2	2	2	2	2	2	2
chr3:87820587-87821670	fixed_Pab-Ppy	1083		2	0	2	2	0	0	2	2	2	2	1	2	2	2	2	2	2	0	2	2	2	2	2	0	3	2	2	0	3	0	2	0	2	2	2	1	2	2	2	2	2	2	3	2	2	2
chr3:88009238-88010762	fixed_Ggod	1524		2	2	2	2	2	2	3	2	2	2	2	2	1	2	1	2	2	2	2	2	2	2	2	2	2	2	1	2	2	2	0	2	2	0	2	2	2	1	2	1	2	1	2	2	2	2
chr3:89315636-89317015	fixed_Gbeg-Ggod-Ggog	1379	EPHA3	2	2	0	0	2	2	0	2	0	2	2	0	0	2	0	0	0	2	2	0	0	2	0	2	2	2	0	2	2	2	0	2	0	0	2	0	2	0	0	0	0	0	2	2	2	2
chr3:95477206-95477828	fixed_Pab-Ppy	622		2	0	2	2	0	0	2	2	2	2	2	2	1	2	2	1	2	0	2	2	2	2	2	0	2	2	2	0	2	0	2	0	2	2	2	2	1	2	2	2	2	2	2	2	2	2
chr3:97102269-97108344	fixed_Ggod	6075		2	2	2	2	2	2	2	2	2	2	2	2	1	2	2	1	1	2	2	1	2	2	1	2	2	2	2	2	2	2	0	2	2	2	2	2	2	2	2	1	2	1	2	2	2	2
chr3:97630798-97631731	fixed_Pab-Ppy	933		1	0	2	2	0	0	2	2	1	2	1	1	1	1	2	1	1	0	2	2	1	2	2	0	2	2	1	0	2	0	2	0	1	1	2	2	2	1	1	1	1	2	2	2	2	2
chr3:97712727-97735785	fixed_Pab-Ppy	23058		2	0	2	2	0	0	2	2	2	2	1	2	2	2	2	1	1	0	2	2	2	2	2	0	2	2	2	0	2	0	2	0	2	2	2	2	2	2	2	2	2	2	2	2	2	2
chr3:98699260-98714031	fixed_Gbeg-Ggod-Ggog	14771	EPHA6	2	2	0	0	2	2	0	2	0	2	2	0	0	2	0	0	0	2	2	0	0	2	0	2	2	2	0	2	2	2	0	2	0	0	2	0	2	0	0	0	0	0	2	2	2	2
chr3:99289980-99298159	fixed_Pab-Ppy	8179		2	0	2	2	0	0	2	2	2	2	2	2	2	2	2	2	2	0	2	2	2	2	2	0	2	2	1	0	2	0	2	0	2	2	2	2	2	2	2	2	2	2	2	2	2	2
chr3:99869925-99871229	fixed_Ppa-Ptre-Ptrs-Ptrt-Ptrv	1304		0	2	2	2	2	2	2	0	2	0	0	2	2	2	2	3	2	2	0	2	2	0	2	2	0	0	2	1	0	1	2	2	2	2	0	2	0	2	2	2	2	1	0	2	0	0
chr3:100252183-100276897	fixed_Pab-Ppy	24714		2	0	2	2	0	0	2	2	2	2	1	2	2	2	2	2	2	0	2	2	2	2	2	0	2	2	2	0	2	0	2	0	2	2	2	2	2	2	2	2	2	2	2	2	2	2
chr3:100320419-100324258	fixed_Ppa-Ptre-Ptrs-Ptrt-Ptrv	3839		0	2	2	2	2	2	2	0	2	0	0	2	2	2	2	2	2	2	0	2	2	0	2	2	0	0	1	2	0	2	2	2	2	2	0	2	0	2	2	2	2	2	0	2	0	0
chr3:100382249-100383916	fixed_Hde-Hsa	1667		2	2	2	2	2	2	2	2	2	2	2	2	2	0	2	1	2	2	2	2	2	2	2	2	2	2	2	2	2	2	2	2	2	2	2	2	2	2	2	2	2	2	2	0	2	2
chr3:103570505-103574204	fixed_Pab-Ppy	3699		2	0	2	2	0	0	2	2	2	2	2	2	2	2	2	2	2	0	2	2	2	2	2	0	2	2	2	0	2	0	2	0	2	2	2	2	2	2	2	2	2	2	2	2	2	2
chr3:103788091-103790277	fixed_Ptre-Ptrs-Ptrt-Ptrv	2186		0	2	2	2	1	1	2	2	2	0	0	2	2	2	2	2	2	1	2	2	2	0	2	1	0	0	2	1	0	1	2	2	2	2	2	2	0	2	2	2	2	2	2	2	2	2
chr3:104306932-104312016	fixed_Ggod	5084		2	2	2	2	2	2	2	2	2	2	2	2	2	2	2	2	2	2	2	2	2	2	2	2	2	2	2	2	2	2	0	2	2	2	2	2	2	2	2	2	2	2	2	2	2	2
chr3:106120213-106127815	fixed_Pab-Ppy	7602		2	0	2	2	0	0	2	2	2	2	2	2	2	2	2	2	2	0	2	2	2	2	2	0	2	2	2	0	2	0	2	0	2	2	2	2	2	2	2	2	2	2	2	2	2	2
chr3:107277951-107283489	fixed_Pab-Ppy	5538		2	0	1	2	0	0	2	2	2	2	1	2	2	2	1	2	2	0	2	2	2	2	2	0	2	1	2	0	2	0	2	0	1	2	2	2	2	2	2	2	2	2	2	2	2	1
chr3:110177628-110180116	fixed_Pab-Ppy	2488	MORC1	2	0	2	2	0	0	2	2	2	2	2	2	2	2	2	2	2	0	2	2	2	2	2	0	2	2	2	0	2	0	2	0	2	2	2	2	2	2	2	2	2	2	2	2	2	2
chr3:110858544-110873632	fixed_Ptrv	15088		0	2	2	2	2	2	2	2	2	2	2	2	2	2	2	2	2	1	2	2	2	2	2	2	0	2	2	2	2	2	2	2	2	2	2	2	2	2	2	2	2	2	2	2	2	2
chr3:119925033-119925533	fixed_Pab-Ppy	500		2	0	2	2	0	0	2	2	2	2	1	2	2	2	2	2	2	0	2	2	2	2	2	0	2	2	1	0	3	0	2	0	2	2	2	2	2	2	2	2	2	2	2	2	2	3
chr3:120838543-120840701	fixed_Ppa-Ptre-Ptrs-Ptrt-Ptrv	2158		0	2	2	2	2	2	2	0	2	0	0	2	2	2	2	2	2	2	0	2	2	0	2	2	0	0	2	2	0	2	1	2	2	2	0	2	0	2	2	2	2	2	0	2	0	0
chr3:122292129-122307543	fixed_Pab-Ppy	15414	STXBP5L	2	0	2	2	0	0	2	2	2	2	2	2	2	2	2	1	2	0	2	2	2	2	2	0	2	2	2	0	2	0	2	0	2	2	2	2	2	2	2	2	2	2	2	2	2	2
chr3:123102144-123110223	fixed_Ptre-Ptrs-Ptrt-Ptrv	8079	SLC15A2	0	2	2	2	2	2	2	2	2	0	0	2	2	2	2	2	3	2	2	2	2	0	2	2	0	0	2	3	0	2	2	2	2	2	2	2	0	1	2	2	2	2	2	2	2	2
chr3:123795334-123798395	fixed_Ptre-Ptrs-Ptrt-Ptrv	3061	PARP15	0	2	2	2	2	2	2	2	2	0	0	2	2	2	2	3	2	2	2	2	2	0	2	2	0	0	2	2	0	2	2	2	2	2	2	2	0	2	2	2	2	2	2	2	2	2
chr3:127746417-127747187	fixed_Pab-Ppy	770		2	0	2	1	0	0	1	2	2	2	2	2	1	2	2	2	2	0	2	2	2	2	2	0	3	2	1	0	2	0	1	0	2	2	2	2	2	2	2	2	1	1	2	2	2	2
chr3:127863286-127865343	fixed_Pab-Ppy	2057	NUP210P1	2	0	3	3	0	0	2	3	3	2	2	3	2	2	2	2	2	0	3	3	2	2	2	0	2	2	2	0	3	0	2	0	2	2	2	2	2	3	2	2	2	2	2	3	2	3
chr3:128991999-128992922	fixed_Ppa	923	MGLL	2	2	2	2	2	2	2	0	2	2	1	2	2	2	2	2	1	1	0	2	2	2	2	2	2	2	2	2	2	2	2	2	2	2	0	1	2	2	2	2	2	2	0	2	0	0
chr3:129251413-129252635	fixed_Gbeg-Ggod-Ggog	1222		2	1	0	0	1	2	0	2	0	1	1	0	0	2	0	0	0	1	2	0	0	2	0	2	1	1	0	1	3	2	0	2	0	0	2	0	2	0	0	0	0	0	1	2	2	2
chr3:129939939-129947456	fixed_Gbeg-Ggod-Ggog	7517	RAB7A	2	2	0	0	2	2	0	2	0	2	2	0	0	2	0	0	0	2	2	0	0	1	0	2	2	2	0	2	2	2	0	2	0	0	2	0	2	0	0	0	0	0	2	2	2	2
chr3:130265896-130268383	fixed_Ppa-Ptre-Ptrs-Ptrt-Ptrv	2487		0	2	3	3	2	2	2	0	2	0	0	2	3	2	2	2	2	1	0	2	2	0	2	2	0	0	2	2	0	2	2	2	2	2	0	2	0	3	2	2	2	2	0	3	0	0
chr3:131474826-131476727	fixed_Gbeg-Ggod-Ggog	1901	COL6A4P2	2	2	0	0	1	2	0	2	0	2	2	0	0	2	0	0	0	2	2	0	0	2	0	2	2	2	0	2	2	2	0	2	0	0	2	0	2	0	0	0	0	0	2	2	2	2
chr3:134628051-134630323	fixed_Ppa-Ptre-Ptrs-Ptrt-Ptrv	2272	BFSP2	0	2	2	2	3	2	2	0	2	0	0	2	2	2	2	2	2	2	0	2	2	0	2	2	0	0	2	2	0	2	2	2	2	2	0	2	0	2	2	2	2	2	0	2	0	0
chr3:134891514-134895949	fixed_Gbeg	4435		2	2	1	2	2	2	2	2	2	2	2	2	2	2	1	2	2	2	3	2	2	3	0	2	2	2	2	2	2	3	2	3	2	2	2	2	2	2	2	2	1	2	2	2	3	3
chr3:134909210-134931718	fixed_Ppa	22508		2	2	2	2	2	2	2	0	2	2	2	2	2	2	2	2	2	2	0	2	2	2	2	2	2	2	2	3	2	2	2	2	2	2	0	2	2	2	2	2	2	2	0	2	0	0
chr3:135098823-135099524	fixed_Gbeg-Ggod-Ggog	701		2	3	0	0	3	2	0	2	0	2	1	0	0	2	0	0	0	3	2	0	0	2	0	2	2	2	0	3	2	2	0	2	0	0	2	0	2	0	0	0	0	0	2	2	2	2
chr3:139811363-139811863	fixed_Gbeg-Ggod-Ggog	500	FAIM	1	1	0	0	1	1	0	1	0	1	1	0	0	1	0	0	0	1	1	0	0	1	0	1	1	1	0	1	2	1	0	1	0	0	1	0	1	0	0	0	0	0	1	1	1	1
chr3:141243464-141251033	fixed_Pab-Ppy	7569	CLSTN2	2	0	2	2	0	0	2	2	2	2	1	2	2	2	2	2	1	0	2	3	2	2	2	0	2	2	2	0	2	0	2	0	2	2	2	2	2	2	2	2	2	2	2	2	2	2
chr3:141607232-141610886	fixed_Pab-Ppy	3654	CLSTN2	3	0	2	3	0	0	2	2	2	2	2	2	2	2	2	2	2	0	2	2	2	2	2	0	2	2	2	0	2	0	3	0	2	2	3	2	2	2	2	2	2	2	2	2	2	3
chr3:145433851-145435191	fixed_Pab-Ppy	1340		2	0	1	2	0	0	2	2	2	2	1	2	3	2	2	2	3	0	2	2	2	2	2	0	3	2	2	0	2	0	2	0	2	2	2	2	1	2	2	2	2	2	2	2	2	2
chr3:145477181-145479345	fixed_Gbeg-Ggod-Ggog	2164		2	2	0	0	2	2	0	2	0	2	1	0	0	2	0	0	0	2	2	0	0	2	0	1	1	2	0	2	1	2	0	2	0	0	2	0	2	0	0	0	0	0	1	2	2	2
chr3:145866094-145869643	fixed_Pab-Ppy	3549		2	0	2	2	0	0	2	2	2	2	1	2	2	2	2	2	2	0	2	2	2	2	2	0	1	2	2	0	2	0	2	0	2	2	2	2	1	2	2	2	2	2	2	2	2	2
chr3:146364827-146365327	fixed_Pab-Ppy	500		2	0	2	2	0	0	2	2	2	2	2	3	2	1	2	1	2	0	2	2	2	2	2	0	1	2	2	0	2	0	2	0	2	2	2	3	2	2	2	3	2	2	2	2	2	2
chr3:146435028-146452581	Gbeg-Ggod-Ggog-Ppa-Ptre-Ptrs-Ptrt-Ptrv	17553		0	1	0	0	1	2	0	0	0	0	0	0	0	2	0	0	0	1	0	0	0	0	0	2	0	0	0	2	0	2	0	2	0	0	0	0	0	0	0	0	0	0	0	2	0	0
chr3:146501034-146509979	fixed_Gbeg	8945		2	2	1	2	2	2	2	2	2	2	2	2	2	2	2	2	2	2	2	2	2	2	0	2	2	2	2	2	2	2	2	2	2	2	2	2	2	2	2	2	2	2	2	2	2	2
chr3:146698956-146706385	fixed_Pab-Ppy	7429		2	0	1	2	0	0	2	2	2	2	1	2	2	2	2	1	2	0	2	2	2	2	2	0	2	2	2	0	2	0	2	0	2	2	2	2	2	2	2	2	2	1	2	2	2	2
chr3:149493880-149503240	fixed_Ppa-Ptre-Ptrs-Ptrt-Ptrv	9360		0	2	2	2	2	2	2	0	2	0	0	2	2	2	2	2	2	2	0	2	2	0	2	2	0	0	2	2	0	2	2	2	2	2	0	2	0	2	2	2	2	2	0	2	0	0
chr3:151973170-151981618	fixed_Gbeg-Ggod-Ggog	8448		2	2	0	0	2	1	0	2	0	2	1	0	0	2	0	0	0	1	2	0	0	2	0	2	2	2	0	2	2	2	0	2	0	0	2	0	2	0	0	0	0	0	2	2	2	2
chr3:152907997-152928835	fixed_Pab-Ppy	20838	MIR548H2	2	0	2	2	0	0	2	2	2	2	2	2	2	2	2	2	2	0	2	2	2	2	2	0	2	2	2	0	2	0	2	0	2	2	2	2	2	2	2	2	2	2	2	2	2	2
chr3:152982777-153004385	Gbeg-Ggod-Ggog-Ppa-Ptre-Ptrs-Ptrt-Ptrv	21608	MIR548H2,LOC201651	0	2	0	0	2	2	0	0	0	0	0	0	0	2	0	0	0	2	0	0	0	0	0	2	0	0	0	2	0	2	0	2	0	0	0	0	0	0	0	0	0	0	0	2	0	0
chr3:153191481-153198938	fixed_Ppa-Ptre-Ptrs-Ptrt-Ptrv	7457		0	2	2	2	2	2	2	0	2	0	0	2	2	2	2	2	2	2	0	2	2	0	2	2	0	0	2	2	0	2	2	2	2	2	0	2	0	2	2	2	2	2	0	2	0	0
chr3:153954167-153959286	fixed_Gbeg-Ggod-Ggog	5119		2	2	0	0	2	2	0	2	0	2	2	0	0	2	0	0	0	2	2	0	0	2	0	2	2	2	0	2	2	2	0	2	0	0	2	0	2	0	0	0	0	0	2	2	2	2
chr3:154755895-154757083	fixed_Pab-Ppy	1188		2	0	2	1	0	0	2	2	2	2	2	2	2	2	2	1	2	0	2	2	2	2	2	0	2	2	2	0	2	0	2	0	2	2	2	2	2	2	2	2	2	2	3	2	2	2
chr3:156501563-156504158	fixed_Ppa-Ptre-Ptrs-Ptrt-Ptrv	2595		0	2	2	2	2	2	2	0	2	0	0	2	2	2	2	2	2	2	0	2	2	0	2	2	0	0	2	2	0	2	2	2	2	2	0	2	0	2	2	2	2	2	0	2	0	0
chr3:158219526-158224862	fixed_Ppa-Ptre-Ptrs-Ptrt-Ptrv	5336	LEKR1	0	2	2	2	2	2	2	0	2	0	0	2	2	2	2	2	2	2	0	2	2	0	2	2	0	0	2	1	0	2	2	2	2	2	0	2	0	2	2	2	2	2	0	2	0	0
chr3:158666139-158669672	fixed_Gbeg-Ggod-Ggog	3533	VEPH1	2	2	0	0	2	2	0	2	0	2	2	0	0	2	0	0	0	2	2	0	0	2	0	2	2	2	0	2	2	2	0	2	0	0	2	0	2	0	0	0	0	0	2	2	2	2
chr3:158692321-158693465	fixed_Gbeg-Ggod-Ggog	1144	VEPH1	2	2	0	0	2	2	0	2	0	2	2	0	0	2	0	0	0	2	2	0	0	2	0	2	2	2	0	2	2	2	0	2	0	0	2	0	2	0	0	0	0	0	2	2	2	2
chr3:159574222-159575575	fixed_Hde	1353	RSRC1	2	2	2	2	2	2	2	2	2	2	2	2	2	2	2	1	2	2	2	2	2	2	2	2	2	2	2	2	2	2	2	2	2	2	2	2	2	2	2	2	2	2	2	2	2	2
chr3:159678651-159681233	fixed_Pab-Ppy	2582	RSRC1	2	0	2	2	0	0	2	2	2	2	2	2	2	2	2	2	2	0	2	2	2	2	2	0	2	2	2	0	1	0	2	0	2	2	2	2	1	2	2	2	2	2	2	2	2	2
chr3:159949610-159952219	fixed_Hde	2609		2	2	2	2	2	2	2	2	2	2	2	2	2	2	2	2	2	2	2	2	2	2	2	2	2	2	2	2	2	2	2	2	2	2	2	2	2	2	2	2	2	2	2	2	2	2
chr3:160342458-160343351	fixed_Pab-Ppy	893	IQCJ,IQCJ-SCHIP1	2	0	2	2	0	0	2	3	2	2	2	2	2	2	2	2	2	0	2	2	2	2	2	0	2	2	2	0	2	0	2	0	2	2	2	2	2	2	2	2	2	2	2	2	2	2
chr3:160430000-160433629	fixed_Gbeg-Ggod-Ggog	3629	IQCJ,IQCJ-SCHIP1	2	2	0	0	2	2	0	2	0	2	1	0	0	2	0	0	0	2	2	0	0	2	0	2	2	2	0	2	2	2	0	2	0	0	2	0	2	0	0	0	0	0	2	1	2	2
chr3:161332703-161333992	fixed_Gbeg-Ggod-Ggog	1289		2	2	0	0	2	2	0	2	0	2	2	0	0	2	0	0	0	2	2	0	0	2	0	2	2	2	0	2	2	2	0	2	0	0	2	0	2	0	0	0	0	0	2	2	2	2
chr3:161513934-161514985	fixed_Pab-Ppy	1051	IFT80	2	0	1	2	0	0	2	2	1	2	1	2	2	2	2	2	1	0	2	1	2	2	1	0	2	2	1	0	2	0	2	0	2	2	2	2	2	1	2	2	2	2	2	2	2	2
chr3:161677971-161681491	fixed_Gbeg-Ggod-Ggog	3520		2	2	0	0	1	1	0	2	0	2	2	0	0	2	0	0	0	1	2	0	0	2	0	2	2	2	0	2	2	2	0	2	0	0	2	0	2	0	0	0	0	0	2	2	2	2
chr3:161681491-161682537	fixed_Pab-Ppy	1046		2	0	1	2	0	0	1	2	1	2	2	1	1	1	2	1	1	0	2	1	1	2	1	0	2	2	1	0	2	0	1	0	1	1	2	1	2	1	1	1	1	1	2	2	2	2
chr3:162231363-162232841	fixed_Ppa-Ptre-Ptrs-Ptrt-Ptrv	1478	PPM1L	0	2	2	3	2	2	2	0	2	0	0	2	2	2	2	2	3	2	0	2	2	0	2	2	0	0	2	2	0	2	2	2	2	2	0	3	0	2	2	2	2	2	0	2	0	0
chr3:162236055-162237447	fixed_Gbeg-Ggod-Ggog	1392	PPM1L	2	2	0	0	1	1	0	2	0	2	2	0	0	2	0	0	0	2	2	0	0	2	0	2	2	2	0	2	2	2	0	2	0	0	2	0	2	0	0	0	0	0	2	2	1	2
chr3:162331473-162339126	fixed_Gbeg-Ggod-Ggog	7653		2	2	0	0	2	2	0	2	0	2	2	0	0	2	0	0	0	2	2	0	0	2	0	2	2	2	0	2	2	2	0	2	0	0	2	0	2	0	0	0	0	0	2	2	2	2
chr3:163258261-163263388	fixed_Gbeg-Ggod-Ggog	5127		2	2	0	0	1	2	0	2	0	2	1	0	0	2	0	0	0	2	2	0	0	2	0	2	2	2	0	2	2	2	0	2	0	0	2	0	1	0	0	0	0	0	2	2	2	2
chr3:163553713-163555744	fixed_Gbeg-Ggod-Ggog	2031		2	2	0	0	2	2	0	2	0	2	2	0	0	1	0	0	0	2	2	0	0	2	0	2	2	2	0	2	2	2	0	2	0	0	3	0	2	0	0	0	0	0	2	2	2	2
chr3:163658722-163685569	fixed_Ppa-Ptre-Ptrs-Ptrt-Ptrv	26847		0	2	2	2	2	2	2	0	2	0	0	2	2	2	2	1	1	2	0	2	2	0	2	2	0	0	2	2	0	2	2	2	2	2	0	2	0	2	2	2	2	2	0	2	0	0
chr3:163863943-163876074	fixed_Hde	12131		2	2	1	2	2	2	2	2	2	2	1	2	2	2	2	1	2	1	2	2	2	2	2	2	1	2	1	2	1	2	2	2	2	1	2	2	1	2	2	2	2	2	2	2	2	2
chr3:163970977-163978997	fixed_Ppa-Ptre-Ptrs-Ptrt-Ptrv	8020		0	2	1	2	2	2	2	0	2	0	0	2	2	2	2	3	2	2	0	2	2	0	2	1	0	0	2	2	0	2	2	2	2	2	0	3	0	2	2	2	2	1	0	2	0	0
chr3:164224019-164224971	fixed_Gbeg-Ggod-Ggog	952		2	2	0	0	2	2	0	2	0	2	1	0	0	2	0	0	0	2	2	0	0	2	0	2	2	2	0	2	2	2	0	2	0	0	2	0	2	0	0	0	0	0	2	2	2	2
chr3:164251777-164259423	fixed_Gbeg-Ggod-Ggog	7646		2	2	0	0	1	2	0	2	0	2	2	0	0	2	0	0	0	1	2	0	0	2	0	2	2	2	0	2	2	2	0	2	0	0	2	0	2	0	0	0	0	0	2	2	2	2
chr3:164424252-164429362	fixed_Pab-Ppy	5110	LOC647107	2	0	2	2	0	0	2	2	2	2	2	2	2	2	2	1	2	0	2	2	2	2	3	0	2	2	2	0	2	0	2	0	2	2	2	2	2	2	2	2	2	2	2	2	1	2
chr3:164485485-164490164	fixed_Pab-Ppy	4679	LOC647107	2	0	2	2	0	0	2	1	2	2	2	2	2	2	2	1	2	0	2	2	2	2	2	0	2	2	2	0	2	0	2	0	2	2	2	2	2	2	2	2	2	2	2	2	1	2
chr3:164797189-164806906	fixed_Ppa-Ptre-Ptrs-Ptrt-Ptrv	9717		0	1	1	2	2	2	2	0	1	0	0	2	2	2	2	1	1	2	0	1	1	0	2	1	0	0	1	2	0	2	2	2	1	1	0	2	0	1	1	1	2	1	0	2	0	0
chr3:165065805-165068437	fixed_Pab-Ppy	2632		2	0	1	2	0	0	2	2	2	2	2	2	2	2	2	2	2	0	2	2	2	2	2	0	2	2	2	0	2	0	2	0	2	2	2	2	1	2	2	2	2	2	2	2	2	2
chr3:165616236-165621498	fixed_Hde	5262		2	2	2	2	2	2	2	2	2	2	1	2	2	2	2	2	2	1	2	2	2	2	2	2	2	2	2	2	2	2	2	2	2	1	2	2	2	2	2	2	2	2	2	2	2	2
chr3:165624727-165627241	fixed_Ppa	2514		3	3	2	3	3	3	2	0	2	3	2	3	2	3	3	2	3	2	0	3	3	3	3	2	2	3	3	2	2	2	3	3	3	3	0	2	2	3	3	2	3	2	0	3	0	0
chr3:165764452-165777346	fixed_Ppa	12894		2	2	2	2	1	2	2	0	2	2	2	2	2	2	2	1	2	1	0	2	2	2	2	2	1	2	2	1	2	1	2	2	2	2	0	2	1	2	2	2	2	2	0	2	0	0
chr3:165796923-165797772	fixed_Gbeg-Ggod-Ggog	849		3	2	0	0	2	2	0	2	0	2	2	0	0	2	0	0	0	1	2	0	0	2	0	2	2	2	0	1	2	2	0	2	0	0	2	0	2	0	0	0	0	0	2	2	2	2
chr3:165848144-165858191	fixed_Pab-Ppy	10047		2	0	2	2	0	0	2	2	2	2	1	2	2	2	2	2	2	0	2	2	2	2	2	0	2	2	2	0	2	0	2	0	2	2	2	2	1	2	2	2	2	2	2	2	2	2
chr3:165919222-165921674	fixed_Gbeg-Ggod-Ggog	2452		2	2	0	0	2	2	0	2	0	2	1	0	0	2	0	0	0	1	2	0	0	2	0	1	2	2	0	1	2	2	0	2	0	0	2	0	2	0	0	0	0	0	2	1	2	2
chr3:166026206-166031836	fixed_Pab-Ppy	5630		2	0	2	2	0	0	2	2	2	2	2	2	2	2	2	2	2	0	2	2	2	2	2	0	2	2	2	0	2	0	2	0	2	2	2	2	2	2	2	2	2	2	2	2	2	2
chr3:166108030-166117324	fixed_Ppa-Ptre-Ptrs-Ptrt-Ptrv	9294		0	2	2	2	2	2	2	0	2	0	0	2	2	2	2	2	2	2	0	2	2	0	2	2	0	0	2	2	0	2	2	2	2	2	0	3	0	2	2	2	2	2	0	2	0	0
chr3:167145332-167149237	fixed_Gbeg-Ggod-Ggog	3905		2	1	0	0	1	1	0	2	0	2	1	0	0	2	0	0	0	1	2	0	0	2	0	1	1	2	0	1	2	1	0	1	0	0	2	0	1	0	0	0	0	0	1	1	2	2
chr3:167149237-167154417	Gbeg-Ggod-Ggog-Pab-Ppy	5180		2	0	0	0	0	0	0	2	0	2	2	0	0	2	0	0	0	0	2	0	0	2	0	0	2	2	0	0	2	0	0	0	0	0	2	0	2	0	0	0	0	0	2	2	2	2
chr3:167244450-167256210	fixed_Gbeg-Ggod-Ggog	11760		2	1	0	0	1	1	0	1	0	2	1	0	0	2	0	0	0	1	2	0	0	2	0	1	1	2	0	1	1	1	0	1	0	0	2	0	1	0	0	0	0	0	1	2	2	1
chr3:167258209-167260707	fixed_Pab-Ppy	2498		2	0	2	2	0	0	2	2	2	2	1	2	1	2	2	1	1	0	2	2	2	2	2	0	1	2	1	0	2	0	2	0	2	2	2	2	2	2	2	1	2	2	2	2	2	2
chr3:167393343-167397605	fixed_Pab-Ppy	4262		2	0	1	2	0	0	2	2	2	2	2	2	2	2	2	1	2	0	2	2	2	2	2	0	1	2	1	0	2	0	2	0	2	2	2	2	1	2	2	2	2	2	2	2	2	2
chr3:168063932-168068351	fixed_Pab-Ppy	4419		2	0	2	2	0	0	2	2	2	2	1	2	2	2	2	2	2	0	2	2	2	2	2	0	2	2	2	0	1	0	2	0	2	2	2	2	2	2	2	2	2	2	2	2	2	2
chr3:168204924-168208666	fixed_Gbeg-Ggod-Ggog	3742		2	2	0	0	2	2	0	2	0	2	2	0	0	2	0	0	0	2	2	0	0	2	0	2	2	2	0	2	2	2	0	2	0	0	2	0	2	0	0	0	0	0	2	2	2	2
chr3:171247845-171250466	fixed_Ppa-Ptre-Ptrs-Ptrt-Ptrv	2621	GPR160	0	3	2	2	2	3	2	0	2	0	0	2	2	2	2	2	2	2	0	2	2	0	2	2	0	0	2	2	0	2	2	2	2	2	0	2	0	2	2	2	2	2	0	2	0	0
chr3:171565245-171567289	fixed_Pab-Ppy	2044	SKIL	1	0	2	2	0	0	2	2	2	2	1	2	2	2	2	2	2	0	2	2	2	2	2	0	2	2	2	0	2	0	2	0	2	2	2	2	2	2	2	2	2	2	2	2	2	2
chr3:171744713-171747735	fixed_Gbeg	3022	SLC7A14	2	2	2	2	2	2	2	2	2	2	2	2	2	2	2	2	2	2	2	2	2	2	0	2	2	2	2	2	2	2	2	2	2	2	2	2	2	2	2	2	2	2	2	2	2	2
chr3:171860348-171871775	fixed_Pab-Ppy	11427		2	0	2	2	0	0	2	3	2	2	2	2	2	2	2	2	3	0	2	3	2	2	2	0	2	2	2	0	2	0	2	0	2	2	2	2	2	2	2	2	2	2	2	2	2	2
chr3:174761108-174767983	fixed_Pab-Ppy	6875	NLGN1	2	0	2	2	0	0	3	2	2	2	2	2	2	2	2	2	2	0	2	2	2	2	2	0	2	2	2	0	2	0	2	0	2	2	2	2	2	2	2	2	2	2	2	2	2	2
chr3:175278778-175288012	fixed_Ptre-Ptrs-Ptrt-Ptrv	9234	NLGN1	0	2	2	2	2	2	2	2	2	0	0	2	2	2	2	1	2	2	2	2	2	0	2	2	0	0	2	2	0	2	2	2	2	2	2	2	0	2	2	2	2	2	2	2	2	2
chr3:176114295-176124199	fixed_Pab-Ppy	9904	NAALADL2	2	0	2	2	0	0	2	2	2	2	2	2	2	2	2	2	2	0	2	2	2	2	2	0	2	2	2	0	2	0	2	0	2	2	2	2	1	2	2	2	2	2	2	2	2	2
chr3:177211724-177214114	fixed_Ppa-Ptre-Ptrs-Ptrt-Ptrv	2390		0	2	1	2	2	2	2	0	2	0	0	2	1	2	2	2	2	2	0	2	2	0	2	2	0	0	2	2	0	2	2	2	2	1	0	2	0	2	2	2	2	2	0	2	0	0
chr3:177310111-177310717	fixed_Ppa	606		2	2	2	2	2	2	2	0	2	1	1	1	2	2	2	2	2	2	0	2	2	2	2	2	2	2	2	2	2	2	2	2	2	2	0	2	1	2	1	2	2	2	0	2	0	0
chr3:186705909-186708683	fixed_Gbeg-Ggod-Ggog	2774	LIPH	2	2	0	0	2	2	0	2	0	2	2	0	0	2	0	0	0	2	2	0	0	2	0	2	2	2	0	2	2	2	0	2	0	0	2	0	2	0	0	0	0	0	2	2	2	2
chr3:190742873-190749675	fixed_Pab-Ppy	6802		2	0	1	2	0	0	2	2	2	2	2	2	2	2	2	2	2	0	2	2	2	2	2	0	2	2	2	0	2	0	2	0	2	2	2	2	2	2	2	2	2	2	2	2	2	2
chr3:191936950-191941273	fixed_Gbeg-Ggod-Ggog	4323		2	2	0	0	2	2	0	2	0	2	2	0	0	2	0	0	0	2	2	0	0	2	0	1	2	2	0	1	1	2	0	2	0	0	2	0	2	0	0	0	0	0	2	2	2	2
chr3:192994185-193054785	fixed_Gbeg-Ggod-Ggog	60600		2	2	0	0	2	2	0	2	0	2	2	0	0	2	0	0	0	1	2	0	0	2	0	2	2	2	0	1	2	2	0	2	0	0	2	0	2	0	0	0	0	0	2	2	2	2
chr3:194386522-194388101	fixed_Ppa	1579		2	2	2	2	2	2	2	0	2	2	2	2	2	2	2	2	2	2	0	2	2	2	2	2	2	2	2	2	2	2	2	2	2	2	0	2	2	2	2	2	2	2	0	2	0	0
chr3:196986958-197016615	fixed_Pab-Ppy	29657	MUC4	2	0	2	2	0	0	2	2	2	2	2	2	2	2	2	2	2	0	2	2	2	2	2	0	2	2	2	0	2	0	2	0	2	2	2	2	2	2	2	2	2	2	2	2	2	2
chr4:603726-604381	fixed_Ppa-Ptre-Ptrs-Ptrt-Ptrv	655		0	2	2	2	2	2	1	0	2	0	0	2	2	2	2	2	2	2	0	1	2	0	1	2	0	0	2	2	0	2	2	2	2	2	0	2	0	2	2	2	2	2	0	2	0	0
chr4:605880-614525	fixed_Pab-Ppy	8645	PDE6B	2	0	1	2	0	0	1	1	1	2	2	2	2	2	1	3	2	0	1	1	2	2	2	0	2	2	2	0	2	0	1	0	2	2	2	1	2	2	2	2	2	2	2	2	2	1
chr4:3787571-3788479	fixed_Ppa-Ptre-Ptrs-Ptrt-Ptrv	908		0	2	2	2	2	2	1	0	3	0	0	2	2	2	2	2	2	2	0	2	2	0	2	2	0	0	2	3	0	3	1	3	2	2	0	1	0	2	2	2	2	1	0	2	0	0
chr4:7609847-7612942	fixed_Pab-Ppy	3095	SORCS2	2	0	2	2	0	0	2	2	2	2	2	2	2	2	2	2	2	0	2	2	2	2	2	0	2	2	2	0	2	0	2	0	2	2	2	2	2	2	2	2	2	2	2	2	2	2
chr4:8585942-8596040	fixed_Pab-Ppy	10098		2	0	2	2	0	0	2	2	2	2	2	2	2	2	2	2	2	0	2	2	2	2	2	0	2	2	2	0	2	0	2	0	2	2	2	2	2	2	2	2	2	2	2	2	2	2
chr4:9406993-9411708	fixed_Pab-Ppy	4715		4	0	3	6	0	0	6	4	7	3	3	4	5	9	4	4	5	0	3	5	4	3	4	0	3	3	6	0	3	0	6	0	4	6	3	4	2	6	6	5	4	5	3	10	3	3
chr4:9486645-9490261	fixed_Pab-Ppy	3616	SLC2A9	2	0	2	2	0	0	2	2	2	2	2	2	2	2	2	2	2	0	2	2	2	2	2	0	2	2	2	0	2	0	3	0	2	2	2	2	2	2	2	2	2	2	2	2	2	2
chr4:9851877-9857126	fixed_Ppa-Ptre-Ptrs-Ptrt-Ptrv	5249		0	2	1	2	2	2	2	0	1	0	0	1	1	2	2	2	1	2	0	2	2	0	1	2	0	0	1	2	0	2	2	2	2	1	0	1	0	2	2	1	2	1	0	2	0	0
chr4:9858903-9865869	fixed_Gbeg-Ggod-Ggog	6966		2	2	0	0	1	2	0	2	0	2	2	0	0	2	0	0	0	2	2	0	0	2	0	2	2	2	0	2	2	2	0	2	0	0	2	0	2	0	0	0	0	0	2	2	2	2
chr4:9897714-9934260	fixed_Hde	36546		2	2	2	2	2	2	2	2	2	2	2	2	2	2	2	2	2	2	2	2	2	2	2	2	2	2	2	2	2	2	2	2	2	2	2	2	2	2	2	2	2	2	2	2	2	2
chr4:9960029-9960529	fixed_Hde	500		1	2	2	2	1	1	3	2	2	2	2	2	2	2	2	2	2	2	2	3	3	2	2	1	2	2	2	1	1	2	2	2	2	2	2	2	2	3	2	2	2	3	2	2	2	2
chr4:10124459-10128697	fixed_Pab-Ppy	4238	CLNK	2	0	2	2	0	0	2	2	2	2	2	2	2	2	2	2	2	0	2	1	2	2	2	0	2	2	1	0	2	0	2	0	2	2	2	2	2	2	2	2	2	2	2	1	2	2
chr4:10803942-10805333	fixed_Gbeg-Ggod-Ggog	1391		2	2	0	0	2	2	0	2	0	2	2	0	0	2	0	0	0	2	2	0	0	2	0	2	3	2	0	1	2	2	0	2	0	0	2	0	2	0	0	0	0	0	2	2	2	2
chr4:11357885-11359072	fixed_Pab-Ppy	1187		2	0	2	2	0	0	2	2	2	2	2	2	2	2	2	2	2	0	2	2	2	2	2	0	2	2	1	0	3	0	2	0	2	2	2	2	2	2	2	2	2	1	2	2	2	2
chr4:12012275-12016871	fixed_Gbeg-Ggod-Ggog	4596		2	2	0	0	2	2	0	2	0	2	2	0	0	2	0	0	0	2	2	0	0	2	0	1	2	2	0	2	2	2	0	2	0	0	2	0	2	0	0	0	0	0	2	2	2	2
chr4:14328765-14337873	fixed_Pab-Ppy	9108		2	0	2	2	0	0	2	2	2	1	1	2	2	2	2	2	2	0	2	2	2	2	2	0	2	1	2	0	1	0	2	0	2	2	2	2	1	2	2	2	2	2	2	2	2	2
chr4:15585784-15587124	fixed_Ppa-Ptre-Ptrs-Ptrt-Ptrv	1340	PROM1	0	2	2	2	2	2	2	0	2	0	0	2	2	2	2	2	2	2	0	2	3	0	3	2	0	0	2	3	0	2	2	2	3	3	0	2	0	2	2	2	2	2	0	2	0	0
chr4:16178995-16182181	fixed_Ggod-Ggog	3186	LDB2	2	2	0	0	2	2	0	2	0	2	2	1	1	2	0	0	0	2	2	0	0	2	2	2	2	2	0	1	2	1	0	2	1	0	2	0	2	0	0	0	0	0	2	2	2	2
chr4:17299110-17303478	fixed_Pab-Ppy	4368	FAM184B	2	0	2	2	0	0	2	2	2	2	2	2	2	2	2	2	2	0	2	2	2	2	2	0	2	2	2	0	2	0	2	0	2	2	2	2	2	2	2	2	2	2	2	2	2	2
chr4:18565461-18566740	fixed_Gbeg-Ggod-Ggog	1279		2	2	0	0	2	2	0	2	0	2	1	0	0	2	0	0	0	1	2	0	0	2	0	1	1	1	0	2	2	2	0	2	0	0	1	0	1	0	0	0	0	0	2	2	2	2
chr4:20628923-20637562	fixed_Pab-Ppy	8639	KCNIP4	2	0	2	2	0	0	2	2	2	2	2	2	2	2	2	2	2	0	2	2	2	2	2	0	2	2	2	0	2	0	2	0	2	2	2	2	2	2	2	2	2	2	2	2	2	2
chr4:21101120-21106300	fixed_Pab-Ppy	5180	KCNIP4	2	0	2	2	0	0	2	2	2	2	2	2	2	2	2	2	2	0	2	2	2	2	2	0	2	2	2	0	2	0	2	0	2	2	2	2	2	2	2	2	2	2	2	2	2	2
chr4:21118463-21119763	fixed_Pab-Ppy	1300	KCNIP4	2	0	1	1	0	0	1	1	1	1	1	1	2	1	2	1	1	0	2	2	1	1	1	0	1	1	1	0	2	0	1	0	1	1	2	1	1	1	1	1	1	1	1	1	2	1
chr4:24301249-24305961	fixed_Ppa-Ptre-Ptrs-Ptrt-Ptrv	4712		0	2	2	3	2	2	2	0	2	0	0	2	2	2	2	2	2	2	0	2	2	0	2	2	0	0	2	2	0	2	2	2	2	1	0	2	0	2	2	2	2	2	0	2	0	0
chr4:26396944-26401454	fixed_Hde	4510		2	2	2	3	2	2	3	2	2	2	2	2	2	2	2	2	2	2	2	2	2	2	2	2	2	2	1	2	1	2	2	2	2	2	2	2	2	2	2	2	2	2	2	2	2	2
chr4:27026389-27040534	fixed_Gbeg-Ggod-Ggog	14145		2	2	0	0	2	2	0	2	0	2	1	0	0	2	0	0	0	2	2	0	0	2	0	2	2	2	0	2	2	2	0	2	0	0	2	0	2	0	0	0	0	0	2	2	2	2
chr4:27304226-27305816	fixed_Gbeg-Ggod-Ggog	1590		2	2	0	0	2	2	0	2	0	2	2	0	0	2	0	0	0	1	2	0	0	2	0	2	2	2	0	2	2	2	0	2	0	0	2	0	2	0	0	0	0	0	2	2	2	2
chr4:27890674-27902101	Gbeg-Ggod-Ggog-Ppa-Ptre-Ptrs-Ptrt-Ptrv	11427		0	2	0	0	2	2	0	0	0	0	0	0	0	2	0	0	0	2	0	0	0	0	0	2	0	0	0	2	0	2	0	2	0	0	0	0	0	0	0	0	0	0	0	2	0	0
chr4:29279532-29282670	fixed_Gbeg-Ggod-Ggog	3138		2	2	0	0	1	2	0	2	0	2	1	0	0	2	0	0	0	2	2	0	0	2	0	2	1	2	0	2	2	2	0	2	0	0	2	0	2	0	0	0	0	0	2	2	2	2
chr4:29374556-29375705	fixed_Pab-Ppy	1149		2	0	2	1	0	0	2	2	1	2	1	2	2	1	2	1	2	0	2	2	2	2	1	0	1	2	2	0	2	0	2	0	1	2	2	2	2	2	2	1	1	2	2	2	2	2
chr4:30180515-30183928	fixed_Ppa-Ptre-Ptrs-Ptrt-Ptrv	3413		0	2	1	1	2	2	1	0	1	0	0	1	1	1	1	1	1	2	0	1	1	0	1	2	0	0	1	2	0	2	1	2	1	1	0	1	0	1	1	1	1	1	0	2	0	0
chr4:30183928-30186467	Gbeg-Ggod-Ggog-Ppa-Ptre-Ptrs-Ptrt-Ptrv	2539		0	2	0	0	2	2	0	0	0	0	0	0	0	2	0	0	0	1	0	0	0	0	0	2	0	0	0	1	0	2	0	2	0	0	0	0	0	0	0	0	0	0	0	2	0	0
chr4:30589736-30590801	fixed_Ppa-Ptre-Ptrs-Ptrt-Ptrv	1065	PCDH7	0	2	2	1	2	2	2	0	2	0	0	1	2	2	2	2	2	2	0	2	2	0	2	1	0	0	2	2	0	2	2	2	2	2	0	2	0	2	2	2	2	2	0	3	0	0
chr4:31123938-31128685	fixed_Gbeg-Ggod-Ggog	4747		2	2	0	0	1	2	0	2	0	2	2	0	0	2	0	0	0	2	2	0	0	2	0	2	2	2	0	1	2	1	0	2	0	0	2	0	2	0	0	0	0	0	2	2	2	2
chr4:31756144-31760608	fixed_Gbeg-Ggod-Ggog	4464		2	1	0	0	2	2	0	2	0	2	2	0	0	2	0	0	0	1	2	0	0	2	0	1	2	2	0	2	2	2	0	1	0	0	2	0	2	0	0	0	0	0	2	2	2	2
chr4:31968247-31971406	fixed_Ptre-Ptrs-Ptrt-Ptrv	3159		0	2	2	2	2	2	4	2	2	0	0	2	2	2	2	2	2	3	2	2	2	0	3	2	0	0	2	2	0	3	2	2	2	2	2	3	0	2	3	2	2	2	2	2	2	2
chr4:31996640-32002494	fixed_Ppa-Ptre-Ptrs-Ptrt-Ptrv	5854		0	2	1	2	1	2	2	0	2	0	0	2	2	2	2	2	2	2	0	2	2	0	2	1	0	0	2	1	0	1	2	1	2	2	0	2	0	2	2	2	2	2	0	2	0	0
chr4:33179241-33192955	fixed_Gbeg-Ggod-Ggog	13714		2	1	0	0	1	1	0	2	0	2	2	0	0	2	0	0	0	1	2	0	0	2	0	1	2	2	0	1	2	2	0	2	0	0	2	0	2	0	0	0	0	0	2	2	2	2
chr4:33252426-33262812	fixed_Gbeg-Ggod-Ggog	10386		2	1	0	0	2	2	0	2	0	2	2	0	0	2	0	0	0	2	2	0	0	2	0	2	2	2	0	1	2	1	0	1	0	0	2	0	2	0	0	0	0	0	2	2	2	2
chr4:33830853-33847501	fixed_Pab-Ppy	16648		2	0	2	2	0	0	2	2	2	1	1	2	1	1	3	1	1	0	2	3	2	2	2	0	1	2	1	0	2	0	2	0	2	2	2	2	2	2	2	1	2	1	1	2	2	2
chr4:33849863-33858744	fixed_Ggod-Ggog	8881		2	2	0	0	2	2	0	2	0	2	2	0	0	2	0	0	0	2	2	0	0	2	1	1	2	2	0	2	1	2	0	2	0	0	2	0	2	0	0	0	0	0	2	1	2	2
chr4:34059712-34062752	fixed_Ppa-Ptre-Ptrs-Ptrt-Ptrv	3040		0	1	2	2	2	2	2	0	2	0	0	2	2	2	2	2	2	2	0	2	2	0	2	2	0	0	2	2	0	1	2	2	2	2	0	2	0	1	2	2	2	2	0	2	0	0
chr4:34357360-34361682	fixed_Gbeg-Ggod-Ggog	4322		2	2	0	0	2	2	0	2	0	3	2	0	0	2	0	0	0	2	2	0	0	2	0	2	2	2	0	2	2	2	0	2	0	0	2	0	2	0	0	0	0	0	2	2	2	2
chr4:35077452-35081368	fixed_Gbeg-Ggod-Ggog	3916		2	2	0	0	1	1	0	2	0	2	1	0	0	2	0	0	0	2	2	0	0	1	0	1	2	2	0	1	2	2	0	2	0	0	2	0	2	0	0	0	0	0	2	2	2	2
chr4:35250655-35252825	fixed_Gbeg-Ggod-Ggog	2170		1	2	0	0	2	2	0	2	0	2	2	0	0	2	0	0	0	2	2	0	0	2	0	1	2	2	0	2	2	1	0	2	0	0	2	0	2	0	0	0	0	0	2	2	2	2
chr4:39050551-39068759	fixed_Gbeg-Ggod-Ggog	18208		2	2	0	0	2	2	0	2	0	2	2	0	0	2	0	0	0	1	2	0	0	2	0	2	2	2	0	2	2	2	0	2	0	0	2	0	2	0	0	0	0	0	2	2	2	2
chr4:39276220-39282142	fixed_Gbeg-Ggod-Ggog	5922	C4orf34	2	2	0	0	2	2	0	2	0	2	2	0	0	2	0	0	0	2	2	0	0	2	0	2	2	2	0	2	2	2	0	2	0	0	2	0	2	0	0	0	0	0	2	2	2	2
chr4:40038969-40044798	fixed_Gbeg-Ggod-Ggog	5829	CHRNA9	2	2	0	0	2	2	0	2	0	2	2	0	0	2	0	0	0	2	2	0	0	2	0	2	2	2	0	2	2	2	0	2	0	0	2	0	2	0	0	0	0	0	2	2	2	2
chr4:42392430-42403055	fixed_Pab-Ppy	10625		2	0	3	2	0	0	3	2	2	2	2	2	2	1	2	3	2	0	2	2	2	2	2	0	2	2	2	0	3	0	2	0	2	2	2	2	2	2	2	2	2	2	2	2	2	2
chr4:42410708-42412597	fixed_Gbeg-Ggod-Ggog	1889		2	2	0	0	2	1	0	2	0	2	2	0	0	3	0	0	0	2	2	0	0	2	0	2	2	2	0	2	2	2	0	2	0	0	2	0	2	0	0	0	0	0	2	2	2	2
chr4:42609236-42622879	fixed_Ggod	13643	GRXCR1	2	2	2	2	2	2	2	2	2	2	2	2	2	2	2	2	2	2	2	2	2	2	2	2	2	2	2	2	1	2	0	2	2	2	2	2	2	2	2	2	2	2	2	2	2	2
chr4:43175778-43177244	fixed_Pab-Ppy	1466		2	0	1	2	0	0	3	2	2	2	1	2	2	2	2	2	2	0	2	2	2	2	2	0	2	2	2	0	2	0	2	0	2	2	2	3	2	2	2	2	2	2	2	2	2	2
chr4:43335456-43374548	fixed_Gbeg	39092		2	2	2	2	2	2	2	2	2	2	2	2	2	2	2	2	2	2	2	2	2	2	0	1	2	2	2	2	2	2	2	2	2	2	2	2	2	2	2	2	2	2	2	2	2	2
chr4:43935511-43940703	fixed_Ptre-Ptrs-Ptrt-Ptrv	5192	KCTD8	0	2	2	2	2	2	2	2	2	0	0	2	2	2	2	2	2	2	2	2	2	0	2	2	0	0	2	2	0	2	2	2	2	2	2	2	0	2	2	2	2	2	2	2	2	2
chr4:44662496-44665329	fixed_Pab-Ppy	2833		2	0	2	2	0	0	2	2	2	2	2	2	2	2	2	2	2	0	2	2	2	2	2	0	2	2	2	0	2	0	3	0	2	2	2	2	2	2	2	2	2	2	2	2	2	2
chr4:45184606-45186419	fixed_Gbeg	1813		2	2	2	2	2	2	2	2	2	3	2	2	2	2	2	2	2	2	2	2	2	2	0	2	2	2	2	2	2	2	2	2	2	2	2	2	2	2	2	2	2	2	2	2	2	2
chr4:45472435-45473405	fixed_Pab-Ppy	970		1	0	1	1	0	0	1	1	1	1	1	1	1	1	2	1	1	0	1	1	1	1	1	0	1	1	1	0	1	0	1	0	1	1	1	1	1	1	1	1	1	1	1	1	1	2
chr4:45500161-45505590	fixed_Pab-Ppy	5429		2	0	1	2	0	0	2	2	1	1	1	2	2	1	1	2	1	0	2	2	2	1	1	0	1	1	1	0	2	0	2	0	1	1	1	2	1	1	2	2	2	2	2	1	1	1
chr4:45865996-45882453	fixed_Ggod	16457		2	2	1	1	2	2	2	2	2	2	2	1	2	2	2	1	2	2	2	2	2	2	2	1	1	2	1	2	2	2	0	2	2	2	2	2	1	2	1	1	2	2	2	2	2	2
chr4:46291292-46298150	fixed_Pab-Ppy	6858		2	0	2	2	0	0	2	2	2	2	1	2	2	2	2	2	1	0	2	2	2	2	2	0	2	2	2	0	1	0	2	0	2	2	2	2	2	2	2	2	2	2	2	2	2	2
chr4:46779970-46790504	fixed_Gbeg-Ggod-Ggog	10534	GABRB1	2	2	0	0	2	2	0	2	0	2	2	0	0	2	0	0	0	2	2	0	0	2	0	2	2	2	0	2	2	2	0	2	0	0	2	0	2	0	0	0	0	0	2	2	2	2
chr4:47648756-47676690	fixed_Pab-Ppy	27934	CNGA1	2	0	2	2	0	0	2	2	2	2	1	2	2	2	2	2	2	0	2	2	2	2	2	0	2	2	2	0	2	0	2	0	2	2	2	2	2	2	2	2	2	2	2	2	2	2
chr4:47995980-47997793	fixed_Pab-Ppy	1813		2	0	2	2	0	0	2	2	2	2	2	2	2	2	2	2	2	0	2	2	2	2	2	0	2	2	2	0	2	0	2	0	2	2	2	2	2	2	2	2	2	2	2	2	2	2
chr4:52696769-52699151	fixed_Pab-Ppy	2382		1	0	2	1	0	0	2	2	2	2	1	2	2	2	2	2	2	0	2	2	2	2	2	0	2	2	2	0	2	0	2	0	2	2	2	2	2	2	2	1	2	2	2	2	2	2
chr4:54366687-54375304	fixed_Ppa-Ptre-Ptrs-Ptrt-Ptrv	8617		0	2	2	2	2	2	2	0	2	0	0	2	2	2	2	2	2	2	0	2	2	0	2	2	0	0	2	2	0	2	2	2	2	2	0	2	0	2	2	2	2	2	0	2	0	0
chr4:54588181-54591008	fixed_Pab-Ppy	2827	CHIC2	2	0	2	2	0	0	2	2	2	2	1	2	2	2	2	1	2	0	2	2	2	2	2	0	2	2	2	0	2	0	2	0	2	2	2	2	1	2	2	2	2	2	2	2	2	2
chr4:58450711-58454332	fixed_Gbeg-Ggod-Ggog	3621		2	2	0	0	2	2	0	2	0	2	2	0	0	2	0	0	0	2	2	0	0	2	0	2	2	2	0	2	1	2	0	2	0	0	2	0	1	0	0	0	0	0	2	2	2	2
chr4:59519850-59520350	fixed_Pab-Ppy	500		2	0	2	2	0	0	2	2	2	2	2	2	1	2	2	1	1	0	2	2	1	2	2	0	3	2	1	0	2	0	2	0	1	1	2	2	2	2	2	1	2	2	2	2	2	2
chr4:60936664-60940614	fixed_Gbeg-Ggod-Ggog	3950		2	1	0	0	1	1	0	2	0	2	2	0	0	2	0	0	0	1	2	0	0	2	0	1	1	2	0	1	2	1	0	1	0	0	2	0	2	0	0	0	0	0	2	1	2	2
chr4:62151452-62152284	fixed_Ppa-Ptre-Ptrs-Ptrt-Ptrv	832	LPHN3	0	2	2	2	1	2	3	0	2	0	0	2	2	2	2	2	2	2	0	1	1	0	2	2	0	0	2	2	0	1	2	1	1	2	0	2	0	2	2	2	2	2	0	2	0	0
chr4:62939859-62944073	fixed_Pab-Ppy	4214		2	0	2	2	0	0	2	2	2	2	2	2	2	2	2	2	2	0	2	2	1	2	2	0	2	2	2	0	2	0	2	0	2	2	2	2	2	2	2	1	2	2	2	2	2	2
chr4:63079406-63080248	fixed_Ppy	842		2	1	2	2	0	2	2	2	2	2	1	2	2	2	2	2	2	0	2	2	2	2	2	0	2	1	1	0	1	0	2	0	2	2	2	2	2	2	3	2	2	2	2	2	2	2
chr4:63494007-63497123	fixed_Gbeg-Ggod-Ggog	3116		2	2	0	0	2	2	0	2	0	2	2	0	0	2	0	0	0	2	2	0	0	2	0	2	2	2	0	2	2	2	0	2	0	0	2	0	1	0	0	0	0	0	2	2	2	2
chr4:63570423-63587709	Gbeg-Ggod-Ggog-Ppa-Ptre-Ptrs-Ptrt-Ptrv	17286		0	2	0	0	2	2	0	0	0	0	0	0	0	1	0	0	0	2	0	0	0	0	0	2	0	0	0	2	0	2	0	2	0	0	0	0	0	0	0	0	0	0	0	2	0	0
chr4:63821771-63822479	fixed_Ppa-Ptre-Ptrs-Ptrt-Ptrv	708		0	2	2	2	2	2	2	0	2	0	0	2	2	2	2	1	1	2	0	2	2	0	2	1	0	0	2	2	0	2	2	2	2	2	0	2	0	2	2	2	2	2	0	2	0	0
chr4:63996025-63997767	fixed_Pab-Ppy	1742		2	0	2	1	0	0	2	1	2	2	1	2	2	2	2	1	1	0	1	2	2	2	2	0	1	2	1	0	1	0	2	0	2	2	1	2	2	2	2	1	2	1	2	2	2	1
chr4:64285450-64290655	fixed_Pab-Ppy	5205		2	0	1	2	0	0	2	2	2	2	2	2	1	2	2	1	1	0	2	2	2	2	2	0	2	2	2	0	2	0	2	0	2	1	2	2	1	1	2	2	2	1	2	2	1	1
chr4:64344063-64348497	fixed_Gbeg-Ggod-Ggog	4434		2	2	0	0	2	2	0	2	0	2	2	0	0	2	0	0	0	2	2	0	0	2	0	1	3	2	0	2	2	2	0	2	0	0	2	0	2	0	0	0	0	0	2	2	2	2
chr4:64844611-64845111	fixed_Pab-Ppy	500	TECRL	2	0	1	1	0	0	2	2	2	2	1	2	2	2	2	2	2	0	2	1	2	1	2	0	2	2	1	0	2	0	2	0	2	2	1	2	1	2	2	2	2	2	2	2	2	2
chr4:65014253-65016862	fixed_Pab-Ppy	2609		2	0	2	2	0	0	2	2	2	2	1	2	2	2	2	1	2	0	1	2	2	2	2	0	1	2	2	0	2	0	2	0	2	2	2	2	1	2	2	2	2	2	1	2	2	2
chr4:65203215-65205746	fixed_Pab-Ppy	2531		2	0	1	2	0	0	2	1	1	1	1	2	1	2	2	1	2	0	2	1	1	1	2	0	1	1	1	0	1	0	1	0	2	2	1	2	1	1	2	1	1	1	1	2	2	1
chr4:66334218-66335127	fixed_Pab-Ppy	909		3	0	2	2	0	0	2	2	2	2	2	2	2	2	2	2	2	0	2	2	2	2	2	0	2	2	1	0	2	0	2	0	2	2	2	2	2	2	2	2	2	2	2	2	2	2
chr4:66643560-66652531	fixed_Hde	8971		2	2	2	2	2	2	2	2	2	2	2	2	2	2	2	2	2	2	2	2	2	2	2	2	2	2	2	2	2	2	2	2	2	2	2	2	2	2	2	2	2	2	2	2	2	2
chr4:66937090-66940099	fixed_Gbeg-Ggod-Ggog	3009		2	2	0	0	2	2	0	2	0	2	2	0	0	2	0	0	0	1	2	0	0	2	0	2	1	2	0	2	2	2	0	2	0	0	2	0	2	0	0	0	0	0	2	2	2	2
chr4:67035145-67037833	fixed_Ppa	2688	MIR548AJ2	2	2	1	2	2	2	2	0	2	2	2	2	2	2	2	2	2	2	0	2	2	2	2	1	2	2	2	2	2	2	2	2	2	2	0	2	2	2	1	1	2	2	0	2	0	0
chr4:67364862-67370837	fixed_Pab-Ppy	5975		2	0	2	2	0	0	2	2	2	2	2	2	2	2	2	2	2	0	2	2	2	2	2	0	2	3	2	0	2	0	2	0	2	2	2	2	1	2	2	2	2	2	2	2	2	2
chr4:68496905-68499218	fixed_Ppa-Ptre-Ptrs-Ptrt-Ptrv	2313	TMPRSS11A	0	2	2	1	1	2	2	0	2	0	0	2	1	2	2	2	2	2	0	2	2	0	1	2	0	0	2	1	0	1	2	2	2	2	0	2	0	2	2	2	2	2	0	2	0	0
chr4:68766203-68769145	fixed_Pab-Ppy	2942	TMPRSS11BNL	2	0	2	2	0	0	2	2	2	2	1	2	2	2	2	2	2	0	2	2	2	2	2	0	2	2	2	0	2	0	2	0	2	2	2	2	2	2	2	2	2	2	2	2	2	2
chr4:68939564-68941608	fixed_Ppa-Ptre-Ptrs-Ptrt-Ptrv	2044		0	2	2	2	2	2	2	0	2	0	0	2	2	2	2	1	2	2	0	2	1	0	2	2	0	0	2	2	0	2	2	2	2	2	0	2	0	2	1	2	2	2	0	2	0	0
chr4:68948706-68980149	fixed_Gbeg-Ggod-Ggog	31443		2	2	0	0	2	2	0	2	0	2	2	0	0	2	0	0	0	2	2	0	0	2	0	2	2	2	0	2	2	2	0	2	0	0	2	0	2	0	0	0	0	0	2	2	2	2
chr4:69408821-69410863	fixed_Ppa-Ptre-Ptrs-Ptrt-Ptrv	2042		0	2	2	2	2	2	2	0	2	0	0	2	2	2	2	1	2	2	0	2	1	0	2	2	0	0	2	2	0	2	2	2	2	2	0	2	0	2	2	2	2	2	0	2	0	0
chr4:69417956-69448747	fixed_Gbeg-Ggod-Ggog	30791		2	2	0	0	2	2	0	2	0	2	2	0	0	2	0	0	0	2	2	0	0	2	0	2	2	2	0	2	2	2	0	2	0	0	2	0	2	0	0	0	0	0	2	2	2	2
chr4:70556369-70574660	fixed_Pab-Ppy	18291		2	0	2	2	0	0	3	2	2	2	2	2	2	2	2	2	2	0	2	2	2	2	2	0	2	1	2	0	2	0	2	0	3	2	2	2	2	2	2	1	2	2	2	2	2	2
chr4:70993643-71000511	fixed_Gbeg-Ggod-Ggog	6868		2	2	0	0	2	2	0	2	0	2	2	0	0	2	0	0	0	2	2	0	0	2	0	2	2	2	0	2	2	2	0	2	0	0	2	0	2	0	0	0	0	0	2	2	2	2
chr4:71169463-71180030	fixed_Gbeg	10567		2	2	2	1	2	2	2	2	1	2	1	1	2	2	2	2	1	2	2	2	1	2	0	2	2	2	2	2	2	2	1	2	2	2	2	2	2	2	1	2	2	1	2	2	2	2
chr4:73029855-73052466	fixed_Pab-Ppy	22611		2	0	2	2	0	0	2	2	2	2	2	2	2	2	2	2	2	0	2	2	2	2	2	0	2	2	2	0	2	0	2	0	2	2	2	2	2	2	2	2	2	2	2	2	2	2
chr4:74296494-74296994	fixed_Pab-Ppy	500	ANKRD17	2	0	2	1	0	0	2	2	2	2	2	2	2	2	1	1	2	0	2	2	2	2	2	0	2	2	1	0	2	0	2	0	2	2	2	2	2	1	2	1	1	2	2	2	2	2
chr4:76324770-76333289	fixed_Pab-Ppy	8519		2	0	2	2	0	0	2	2	1	2	2	2	1	1	1	2	1	0	2	2	2	2	1	0	1	2	2	0	2	0	1	0	2	1	2	2	2	1	2	1	2	2	2	2	2	2
chr4:78457579-78459905	fixed_Pab-Ppy	2326		2	0	2	2	0	0	2	2	2	2	2	2	2	2	2	2	2	0	2	2	2	2	2	0	2	2	2	0	2	0	2	0	2	2	2	2	2	2	2	2	2	2	2	2	2	2
chr4:82042956-82043894	fixed_Pab-Ppy	938	C4orf22	2	0	1	2	0	0	3	2	2	2	1	2	1	2	2	2	1	0	1	2	2	1	2	0	1	1	1	0	2	0	2	0	1	2	2	2	2	1	2	1	3	1	1	1	2	2
chr4:84258741-84263672	fixed_Pab-Ppy	4931		2	0	2	2	0	0	2	2	2	2	1	2	1	2	2	2	2	0	2	2	1	2	2	0	2	2	2	0	2	0	2	0	2	2	2	2	2	2	2	2	2	2	2	2	2	2
chr4:86177276-86183163	fixed_Ppa-Ptre-Ptrs-Ptrt-Ptrv	5887		0	2	1	2	1	2	2	0	2	0	0	2	2	2	2	1	2	2	0	2	2	0	2	2	0	0	2	2	0	2	2	2	2	2	0	2	0	2	2	2	2	2	0	2	0	0
chr4:86208756-86213752	fixed_Gbeg-Ggod-Ggog	4996		2	2	0	0	2	2	0	2	0	2	1	0	0	2	0	0	0	1	2	0	0	2	0	1	2	2	0	2	2	2	0	2	0	0	2	0	2	0	0	0	0	0	2	2	2	2
chr4:88719566-88720272	fixed_Gbeg	706		1	2	2	2	2	2	2	2	2	2	2	2	2	2	2	2	2	2	2	2	2	2	0	2	2	1	2	3	2	2	2	2	2	2	2	2	2	2	2	2	2	2	2	2	2	2
chr4:90623973-90624473	Gbeg-Ggod-Ggog-Ppa-Ptre-Ptrs-Ptrt-Ptrv	500		0	2	0	0	2	2	0	0	0	0	0	0	0	2	0	0	0	2	0	0	0	0	0	2	0	0	0	2	0	2	0	2	0	0	0	0	0	0	0	0	0	0	0	1	0	0
chr4:90906881-90912138	fixed_Pab-Ppy	5257	SNCA	2	0	2	2	0	0	2	2	2	2	2	2	2	2	2	2	2	0	2	2	2	2	2	0	2	2	2	0	2	0	2	0	2	2	2	2	2	2	2	2	2	2	2	2	2	2
chr4:91532815-91534401	fixed_Pab-Ppy	1586	FAM190A	2	0	2	2	0	0	2	2	2	2	1	2	2	2	2	2	2	0	2	2	2	2	2	0	2	2	2	0	2	0	2	0	2	2	2	2	2	2	2	2	2	2	2	2	2	2
chr4:91565668-91569995	fixed_Pab-Ppy	4327	FAM190A	2	0	1	2	0	0	2	2	2	2	1	2	2	2	2	2	2	0	2	2	2	2	2	0	2	2	2	0	2	0	2	0	2	2	2	2	1	2	2	2	2	2	2	2	2	2
chr4:91970699-91975969	fixed_Pab-Ppy	5270	FAM190A	2	0	2	2	0	0	2	2	2	2	2	2	2	2	2	2	2	0	2	2	2	2	2	0	2	2	2	0	2	0	2	0	2	2	2	2	2	2	2	2	2	2	2	2	2	2
chr4:92697180-92702246	fixed_Gbeg-Ggod-Ggog	5066	FAM190A	2	1	0	0	1	2	0	2	0	2	1	0	0	2	0	0	0	1	2	0	0	2	0	1	1	2	0	1	2	1	0	1	0	0	2	0	2	0	0	0	0	0	2	1	2	2
chr4:92933700-92934297	fixed_Ppa	597		2	2	2	2	2	2	2	0	2	1	1	3	2	2	2	2	2	2	0	3	2	1	2	2	2	1	1	2	2	1	2	2	2	2	0	3	2	2	2	2	2	2	0	1	0	0
chr4:93040560-93043747	fixed_Pab-Ppy	3187		2	0	2	2	0	0	2	2	2	2	2	2	2	2	2	2	2	0	2	2	2	2	2	0	2	2	2	0	2	0	2	0	2	2	2	2	2	2	2	2	2	2	2	2	2	2
chr4:93964381-93974291	fixed_Pab-Ppy	9910	GRID2	2	0	2	2	0	0	2	2	2	2	2	2	2	2	2	2	2	0	2	2	2	2	2	0	2	2	2	0	2	0	2	0	2	2	2	2	2	2	2	2	2	2	2	2	2	2
chr4:95101139-95103116	fixed_Pab-Ppy	1977		2	0	1	2	0	0	2	2	2	2	2	2	2	2	2	2	2	0	2	1	2	2	2	0	2	2	2	0	2	0	2	0	2	1	2	2	2	2	2	2	2	1	2	2	2	2
chr4:95309329-95313168	fixed_Pab-Ppy	3839		2	0	3	2	0	0	2	2	2	2	2	2	2	2	2	2	3	0	2	2	2	2	2	0	2	2	2	0	3	0	2	0	2	2	2	2	2	2	2	2	2	2	2	2	2	2
chr4:96238573-96242029	fixed_Pab-Ppy	3456	BMPR1B	2	0	2	2	0	0	2	2	2	2	2	2	2	2	2	2	2	0	2	2	2	2	2	0	2	2	2	0	2	0	2	0	2	2	2	2	3	2	2	2	2	2	2	2	2	2
chr4:97501432-97504852	fixed_Pab-Ppy	3420		2	0	1	2	0	0	2	2	1	1	1	1	1	2	2	1	1	0	2	2	2	2	2	0	1	1	1	0	1	0	1	0	2	1	2	1	2	2	1	1	1	1	1	2	2	2
chr4:98567267-98576361	fixed_Ppa	9094		2	2	2	2	2	2	2	0	2	2	2	2	1	2	2	1	2	2	0	2	2	2	2	2	1	2	1	2	2	2	2	2	2	2	0	2	2	2	2	1	2	2	0	2	0	0
chr4:98909642-98929124	fixed_Pab-Ppy	19482	C4orf37	2	0	2	2	0	0	2	2	2	2	2	2	2	2	2	2	2	0	2	2	2	2	2	0	2	2	2	0	2	0	2	0	2	2	2	2	2	2	2	2	2	2	2	2	2	2
chr4:99999376-100000250	fixed_Ptrt	874		2	2	2	2	1	2	2	2	2	2	2	2	2	2	2	2	2	2	2	2	2	1	2	2	2	1	2	2	0	2	2	2	2	2	2	2	1	2	2	2	2	2	1	2	2	2
chr4:101352460-101355061	fixed_Ppa	2601		2	2	2	2	2	2	2	0	2	2	2	2	2	2	2	3	2	2	0	2	2	2	2	2	2	2	2	2	2	2	2	2	2	2	0	2	2	2	2	2	2	2	0	2	0	0
chr4:102878699-102888544	fixed_Pab-Ppy	9845		2	0	2	2	0	0	2	2	2	2	2	2	2	2	2	2	2	0	2	2	2	2	2	0	1	2	2	0	2	0	2	0	2	2	2	2	2	2	2	2	2	2	2	2	2	2
chr4:104620042-104622533	fixed_Ppa-Ptre-Ptrs-Ptrt-Ptrv	2491		0	2	2	2	2	2	2	0	2	0	0	2	2	1	2	2	2	2	0	2	2	0	2	2	0	0	2	2	0	2	2	2	2	2	0	2	0	2	2	2	2	2	0	2	0	0
chr4:107276563-107282561	fixed_Hde	5998	TBCK	2	2	1	2	2	2	2	2	2	2	2	2	2	2	2	1	2	2	2	2	2	2	2	2	2	2	2	2	2	2	2	2	2	2	2	2	2	2	2	2	2	2	2	2	2	2
chr4:108633324-108642184	fixed_Pab-Ppy	8860		2	0	2	2	0	0	2	2	2	2	2	2	2	2	2	2	2	0	2	2	2	2	2	0	2	2	2	0	2	0	2	0	2	2	2	2	2	2	2	2	2	2	2	2	2	2
chr4:108747868-108750349	fixed_Gbeg-Ggod-Ggog	2481		2	2	0	0	2	2	0	2	0	2	2	0	0	2	0	0	0	2	2	0	0	2	0	2	2	2	0	2	2	2	0	2	0	0	2	0	2	0	0	0	0	0	2	2	2	2
chr4:110514201-110515187	fixed_Ppa-Ptre-Ptrs-Ptrt-Ptrv	986		0	2	2	2	2	2	2	0	2	0	0	2	3	2	2	2	3	2	0	2	2	0	2	2	0	0	2	2	0	3	2	3	2	2	0	2	0	2	2	3	2	2	0	2	0	0
chr4:114103450-114104555	fixed_Gbeg-Ggod-Ggog	1105	ANK2	2	2	0	0	2	2	0	2	0	2	1	0	0	2	0	0	0	2	2	0	0	2	0	2	2	2	0	2	2	2	0	2	0	0	2	0	2	0	0	0	0	0	2	2	2	2
chr4:115465997-115468656	fixed_Pab-Ppy	2659		2	0	2	2	0	0	2	2	2	2	2	2	2	2	2	1	2	0	2	2	2	2	2	0	1	2	1	0	2	0	2	0	2	2	2	2	1	2	2	2	2	2	2	2	2	2
chr4:115475460-115476387	fixed_Ppa-Ptre-Ptrs-Ptrt-Ptrv	927		0	2	2	2	2	2	2	0	3	0	0	2	2	2	2	3	3	2	0	2	2	0	2	1	0	0	2	2	0	2	2	2	2	2	0	2	0	2	2	2	2	2	0	2	0	0
chr4:115633069-115633671	fixed_Gbeg-Ggod-Ggog	602		2	2	0	0	2	2	0	2	0	3	2	0	0	2	0	0	0	2	2	0	0	2	0	2	2	2	0	2	2	2	0	2	0	0	2	0	1	0	0	0	0	0	2	2	2	2
chr4:115649820-115650538	fixed_Pab-Ppy	718		1	0	2	2	0	0	2	2	2	2	2	2	2	2	2	2	3	0	2	2	2	2	2	0	3	2	2	0	2	0	2	0	2	2	2	2	2	2	2	2	2	2	3	2	2	2
chr4:116503381-116504012	fixed_Pab-Ppy	631		2	0	1	2	0	0	2	2	2	2	1	2	2	1	1	1	1	0	2	1	1	2	1	0	2	2	2	0	2	0	2	0	2	2	2	1	2	2	1	2	2	2	2	2	2	2
chr4:116689761-116693500	fixed_Pab-Ppy	3739		2	0	1	2	0	0	2	2	2	2	2	2	2	2	2	1	2	0	2	2	2	2	2	0	2	2	2	0	2	0	2	0	2	2	2	2	2	2	2	2	2	2	2	2	2	2
chr4:116708607-116713327	fixed_Gbeg-Ggod-Ggog	4720		2	2	0	0	2	2	0	2	0	2	2	0	0	2	0	0	0	1	2	0	0	2	0	1	2	2	0	2	1	2	0	2	0	0	2	0	1	0	0	0	0	0	2	2	2	2
chr4:116807442-116809034	fixed_Gbeg-Ggod-Ggog	1592		2	2	0	0	2	2	0	2	0	2	2	0	0	2	0	0	0	2	2	0	0	2	0	2	1	2	0	2	2	2	0	2	0	0	2	0	2	0	0	0	0	0	2	2	2	2
chr4:116919578-116925230	fixed_Ggod	5652		2	2	1	2	2	2	2	2	2	2	2	2	2	1	2	2	2	2	2	2	2	2	2	2	2	2	2	2	1	2	0	2	2	2	2	2	2	1	2	2	2	2	2	2	2	2
chr4:117279171-117285861	Gbeg-Ggod-Ggog-Ppa-Ptre-Ptrs-Ptrt-Ptrv	6690		0	2	0	0	2	2	0	0	0	0	0	0	0	2	0	0	0	2	0	0	0	0	0	1	0	0	0	2	0	2	0	2	0	0	0	0	0	0	0	0	0	0	0	2	0	0
chr4:117631739-117634085	fixed_Pab-Ppy	2346		2	0	2	2	0	0	2	2	2	2	1	2	2	2	2	2	2	0	2	2	2	2	2	0	2	2	1	0	2	0	2	0	2	2	2	2	2	2	2	2	2	2	2	2	2	2
chr4:117819737-117823109	fixed_Pab-Ppy	3372		2	0	2	2	0	0	2	2	2	2	2	2	2	2	2	1	2	0	2	2	2	2	2	0	2	2	1	0	2	0	2	0	2	2	2	2	1	2	2	2	2	2	2	2	2	2
chr4:117833894-117835906	fixed_Pab-Ppy	2012		2	0	1	2	0	0	2	2	2	2	2	2	2	2	2	1	2	0	2	2	1	2	2	0	2	2	2	0	2	0	2	0	2	1	2	2	2	2	2	2	1	2	2	2	2	2
chr4:118091145-118092908	fixed_Pab-Ppy	1763		2	0	2	2	0	0	2	2	2	2	1	2	2	2	2	2	2	0	2	2	2	2	2	0	2	2	2	0	1	0	2	0	2	2	2	2	2	2	2	2	2	2	2	2	2	2
chr4:118142027-118145064	fixed_Gbeg-Ggod-Ggog	3037		2	2	0	0	2	2	0	2	0	2	1	0	0	2	0	0	0	2	2	0	0	2	0	2	2	2	0	2	2	2	0	2	0	0	2	0	2	0	0	0	0	0	2	1	2	2
chr4:119285235-119285826	fixed_Ppa-Ptre-Ptrs-Ptrt-Ptrv	591	NDST3	0	2	3	2	2	2	2	0	2	0	0	2	2	1	2	2	2	2	0	2	2	0	2	2	0	0	2	2	0	2	1	2	2	2	0	2	0	2	3	3	2	2	0	2	0	0
chr4:119718451-119733949	fixed_Ppa-Ptre-Ptrs-Ptrt-Ptrv	15498		0	2	9	10	2	2	9	0	7	0	0	9	8	2	8	7	8	2	0	8	8	0	9	2	0	0	8	2	0	2	8	2	9	8	0	8	0	8	10	8	11	8	0	2	0	0
chr4:121253886-121265131	fixed_Pab-Ppy	11245		2	0	2	2	0	0	2	2	2	2	2	2	2	2	2	2	2	0	2	2	2	2	2	0	2	2	2	0	1	0	2	0	2	2	2	2	2	2	2	2	2	2	2	2	2	2
chr4:121747022-121751163	fixed_Pab-Ppy	4141		2	0	2	2	0	0	2	2	2	2	2	2	2	2	2	1	1	0	2	2	2	2	2	0	2	2	2	0	2	0	2	0	2	2	2	2	1	2	2	1	2	2	1	2	2	2
chr4:122027151-122037187	fixed_Gbeg-Ggod-Ggog	10036	PRDM5	2	2	0	0	1	2	0	2	0	2	2	0	0	2	0	0	0	2	2	0	0	2	0	2	2	2	0	2	2	2	0	2	0	0	2	0	2	0	0	0	0	0	2	2	2	2
chr4:122132812-122134801	fixed_Pab-Ppy	1989		2	0	1	2	0	0	1	1	2	2	1	2	2	2	2	2	2	0	2	1	2	2	2	0	1	2	1	0	1	0	2	0	2	1	1	2	2	1	2	2	2	2	2	2	1	1
chr4:122502013-122508203	fixed_Hde	6190	QRFPR	2	2	2	2	1	1	2	2	2	2	2	2	2	2	2	1	2	1	2	2	2	2	2	1	2	2	2	1	2	1	2	1	2	2	2	2	2	2	2	2	2	2	2	2	2	2
chr4:124049423-124052128	fixed_Pab-Ppy	2705	NUDT6	2	0	2	2	0	0	2	2	2	2	1	2	2	2	2	2	2	0	2	2	2	2	2	0	2	2	2	0	2	0	2	0	2	2	2	2	2	2	2	2	2	2	2	2	2	2
chr4:124605140-124605640	fixed_Ppa-Ptre-Ptrs-Ptrt-Ptrv	500		0	2	2	2	2	2	2	0	2	0	0	2	2	2	2	3	2	2	0	2	2	0	2	2	0	0	2	2	0	2	2	2	2	2	0	2	0	2	2	2	2	2	0	2	0	0
chr4:126103394-126105064	fixed_Pab-Ppy	1670		2	0	1	2	0	0	2	2	2	2	1	2	2	2	2	2	2	0	2	2	2	2	2	0	2	2	2	0	2	0	2	0	2	2	2	2	2	2	2	2	2	1	2	2	2	2
chr4:127370063-127379352	fixed_Ppa-Ptre-Ptrs-Ptrt-Ptrv	9289		0	1	1	2	1	2	2	0	2	0	0	2	2	2	2	1	2	2	0	2	2	0	2	1	0	0	1	1	0	1	2	1	2	1	0	2	0	2	2	2	2	2	0	2	0	0
chr4:127418868-127424230	fixed_Ppa-Ptre-Ptrs-Ptrt-Ptrv	5362		0	2	2	2	1	2	2	0	2	0	0	2	2	2	2	2	2	1	0	2	2	0	2	2	0	0	2	2	0	2	2	2	2	2	0	2	0	2	2	2	2	2	0	2	0	0
chr4:127926642-127931537	fixed_Gbeg-Ggod-Ggog	4895		2	2	0	0	2	2	0	2	0	2	2	0	0	2	0	0	0	2	2	0	0	2	0	2	2	2	0	2	2	2	0	2	0	0	2	0	2	0	0	0	0	0	2	2	2	2
chr4:128884451-128885048	fixed_Pab-Ppy	597	SLC25A31	2	0	2	2	0	0	2	2	2	2	2	2	2	2	2	2	2	0	2	2	2	2	2	0	2	2	2	0	2	0	2	0	2	2	2	2	2	2	2	2	2	1	2	2	2	2
chr4:128926976-128929656	fixed_Gbeg	2680	HSPA4L	2	2	1	0	2	2	2	2	2	2	2	2	2	2	1	2	2	2	2	2	2	2	0	2	1	2	2	2	3	1	2	2	1	2	2	1	2	2	1	2	1	1	2	2	2	2
chr4:129344823-129346984	fixed_Ppa	2161	LARP1B	2	2	2	2	2	2	2	0	2	2	2	2	2	2	2	2	1	2	0	2	2	2	2	2	2	2	2	2	2	2	2	2	2	2	0	2	2	2	2	2	1	2	0	2	0	0
chr4:129482388-129487811	fixed_Gbeg-Ggod-Ggog	5423		2	2	0	0	3	3	0	2	0	2	2	0	0	2	0	0	0	2	2	0	0	2	0	2	2	2	0	2	2	2	0	2	0	0	2	0	2	0	0	0	0	0	2	2	2	2
chr4:130174658-130177538	fixed_Gbeg-Ggod-Ggog	2880	SCLT1	2	2	0	0	2	2	0	2	0	2	1	0	0	2	0	0	0	2	2	0	0	2	0	2	1	2	0	2	2	2	0	2	0	0	2	0	1	0	0	0	0	0	2	2	2	2
chr4:132006824-132014876	fixed_Gbeg-Ggod-Ggog	8052		2	2	0	0	2	2	0	2	0	2	2	0	0	2	0	0	0	2	2	0	0	2	0	2	2	2	0	2	2	2	0	2	0	0	2	0	1	0	0	0	0	0	1	2	2	2
chr4:132206711-132211012	fixed_Pab-Ppy	4301		3	0	2	2	0	0	2	2	2	2	1	2	2	2	2	2	2	0	2	2	1	2	2	0	2	2	2	0	2	0	2	0	2	2	2	2	1	2	2	1	2	2	2	2	2	2
chr4:132770377-132771089	fixed_Ppa-Ptre-Ptrs-Ptrt-Ptrv	712		0	2	2	2	2	2	2	0	2	0	0	2	1	2	2	1	2	2	0	2	1	0	2	1	0	0	2	2	0	2	2	2	2	2	0	2	0	2	2	1	2	2	0	2	0	0
chr4:133563022-133564188	fixed_Pab-Ppy	1166		2	0	2	2	0	0	2	2	2	2	2	2	1	2	2	2	1	0	2	2	2	2	2	0	2	2	2	0	2	0	2	0	1	2	2	2	2	2	2	2	2	2	1	2	2	2
chr4:134092719-134093560	fixed_Pab-Ppy	841		2	0	2	2	0	0	2	2	3	2	2	2	2	2	2	2	2	0	2	2	2	2	2	0	2	2	2	0	2	0	2	0	2	2	2	3	2	2	2	2	2	2	2	2	2	2
chr4:134393551-134396296	fixed_Ppa-Ptre-Ptrs-Ptrt-Ptrv	2745		0	2	2	2	2	2	2	0	2	0	0	2	1	2	2	1	1	2	0	2	2	0	2	2	0	0	1	2	0	2	2	2	2	2	0	2	0	2	2	2	2	2	0	2	0	0
chr4:137140100-137142651	fixed_Ggod	2551		2	2	1	2	2	2	1	2	2	2	2	1	2	2	1	1	1	2	2	2	1	2	2	2	2	2	2	2	2	2	0	2	2	2	2	1	2	2	2	1	2	2	2	2	2	2
chr4:137959327-137960867	fixed_Pab-Ppy	1540		2	0	1	2	0	0	2	2	2	2	1	2	2	2	2	2	2	0	2	2	2	2	2	0	2	2	2	0	2	0	3	0	2	2	2	2	2	2	2	2	2	1	2	2	2	2
chr4:138133628-138147192	fixed_Gbeg-Ggod-Ggog	13564		2	2	0	0	2	2	0	2	0	2	1	0	0	2	0	0	0	2	2	0	0	2	0	2	2	2	0	2	2	2	0	2	0	0	2	0	2	0	0	0	0	0	2	2	2	2
chr4:138383251-138387625	fixed_Pab-Ppy	4374		2	0	2	2	0	0	2	2	2	2	2	2	2	2	2	1	2	0	2	2	2	2	2	0	2	2	2	0	2	0	2	0	2	2	2	2	2	2	2	2	2	2	2	2	2	2
chr4:138915572-138919249	fixed_Gbeg	3677		2	2	2	2	2	2	2	2	2	2	2	2	2	2	2	2	2	2	2	2	2	2	0	1	2	2	2	2	2	2	2	2	2	2	2	2	2	2	2	2	2	2	2	2	2	2
chr4:139407826-139411028	fixed_Ppa-Ptre-Ptrs-Ptrt-Ptrv	3202		0	2	2	2	2	2	2	0	2	0	0	2	2	2	2	2	2	2	0	2	2	0	2	2	0	0	2	2	0	2	2	2	2	2	0	2	0	2	2	2	2	2	0	2	0	0
chr4:141884799-141886876	fixed_Pab-Ppy	2077	TBC1D9	1	0	2	2	0	0	2	2	2	2	2	2	2	2	2	2	2	0	2	2	2	2	2	0	2	2	2	0	2	0	2	0	2	2	2	2	2	2	2	2	2	2	2	2	2	2
chr4:142640752-142652998	fixed_Ggod	12246		2	2	2	2	2	2	2	2	2	2	1	1	2	2	2	2	2	2	2	2	2	2	2	2	2	2	1	2	2	2	0	2	2	2	2	2	2	1	2	2	1	2	2	2	2	2
chr4:143635508-143638054	fixed_Gbeg-Ggod-Ggog	2546	INPP4B	2	2	0	0	2	2	0	2	0	2	1	0	0	2	0	0	0	1	2	0	1	2	0	1	2	2	0	2	2	2	0	2	0	0	2	0	2	1	0	0	0	0	2	2	2	2
chr4:143807600-143811659	fixed_Ppa-Ptre-Ptrs-Ptrt-Ptrv	4059	INPP4B	0	2	2	2	2	2	2	0	2	0	0	2	2	2	2	3	2	2	0	2	2	0	2	2	0	0	2	2	0	2	2	2	2	2	0	3	0	2	2	2	2	2	0	1	0	0
chr4:144806111-144810250	fixed_Ptre-Ptrs-Ptrt-Ptrv	4139	FREM3	0	2	2	2	2	2	2	2	2	0	0	2	2	2	2	2	2	2	2	2	2	0	2	2	0	0	2	2	0	2	2	2	2	2	2	2	0	2	2	2	2	2	1	2	2	2
chr4:145520681-145521754	fixed_Pab-Ppy	1073		2	0	1	2	0	0	2	2	2	2	2	2	2	2	2	2	2	0	2	2	2	2	2	0	2	2	2	0	2	0	3	0	2	2	2	2	2	2	2	2	2	2	2	2	2	2
chr4:146766771-146769559	fixed_Gbeg-Ggod-Ggog	2788	MMAA	2	2	0	0	2	2	0	2	0	2	2	0	0	2	0	0	0	2	2	0	0	2	0	2	2	2	0	2	2	2	0	2	0	0	2	0	2	0	0	0	0	0	2	2	2	2
chr4:147862316-147874685	fixed_Gbeg-Ggod-Ggog	12369	TTC29	2	2	0	0	2	2	0	2	0	2	2	0	0	2	0	0	0	2	2	0	0	2	0	2	2	2	0	2	2	2	0	2	0	0	2	0	2	0	0	0	0	0	1	2	2	2
chr4:151062633-151067781	fixed_Gbeg-Ggod-Ggog	5148		2	2	0	0	2	2	0	2	0	2	1	0	0	2	0	0	0	2	2	0	0	2	0	2	2	2	0	2	2	2	0	2	0	0	2	0	2	0	0	0	0	0	2	2	2	2
chr4:151771795-151779049	fixed_Ppa-Ptre-Ptrs-Ptrt-Ptrv	7254	LRBA	0	2	2	2	2	2	2	0	2	0	0	2	2	2	2	2	2	2	0	2	2	0	2	2	0	0	2	2	0	2	2	2	2	2	0	2	0	2	2	2	2	2	0	2	0	0
chr4:154823379-154825377	fixed_Gbeg-Ggod-Ggog	1998	TLR2	2	2	0	0	2	2	0	2	0	2	2	0	0	2	0	0	0	2	2	0	0	2	0	2	2	2	0	2	1	2	0	2	0	0	1	0	2	0	0	0	0	0	2	2	2	2
chr4:155412217-155417638	fixed_Pab-Ppy	5421	DCHS2	2	0	2	2	0	0	2	2	2	2	2	2	3	2	2	2	2	0	2	3	2	2	2	0	2	2	2	0	2	0	2	0	2	2	2	2	2	2	2	2	2	2	2	2	2	2
chr4:155927189-155931533	fixed_Ptre-Ptrs-Ptrt-Ptrv	4344	RBM46	0	2	2	2	1	2	2	2	2	0	0	2	1	2	2	1	2	1	2	2	2	0	2	2	0	0	1	2	0	2	2	2	2	2	2	2	0	2	2	1	2	2	2	2	2	2
chr4:156571799-156576713	fixed_Pab-Ppy	4914		2	0	2	2	0	0	2	2	2	2	2	2	2	2	2	2	2	0	2	2	2	2	2	0	2	2	2	0	2	0	2	0	2	2	2	2	2	2	2	2	2	2	2	2	2	2
chr4:157177329-157193212	Gbeg-Ggod-Ggog-Ppa-Ptre-Ptrs-Ptrt-Ptrv	15883		0	2	0	0	1	2	0	0	0	0	0	0	0	2	0	0	0	1	0	0	0	0	0	1	0	0	0	2	0	2	0	2	0	0	0	0	0	0	0	0	0	0	0	2	0	0
chr4:158674970-158690602	fixed_Ppa-Ptre-Ptrs-Ptrt-Ptrv	15632		0	2	1	2	2	2	1	0	2	0	0	1	2	2	2	1	1	2	0	2	1	0	1	2	0	0	1	2	0	2	2	2	2	2	0	1	0	1	2	2	2	2	0	2	0	0
chr4:158990583-158998999	fixed_Ppa-Ptre-Ptrs-Ptrt-Ptrv	8416		0	2	2	2	2	2	2	0	2	0	0	2	2	2	2	2	2	2	0	2	2	0	2	2	0	0	2	2	0	3	2	2	2	2	0	2	0	2	2	2	2	2	0	2	0	0
chr4:159288292-159296324	fixed_Gbeg-Ggod-Ggog	8032	FAM198B	2	2	0	0	2	2	0	2	0	2	2	0	0	2	0	0	0	2	2	0	0	2	0	2	2	2	0	2	2	2	0	2	0	0	2	0	2	0	0	0	0	0	2	2	2	2
chr4:160025175-160026649	fixed_Ppa-Ptre-Ptrs-Ptrt-Ptrv	1474	FNIP2	0	2	2	2	2	2	2	0	3	0	0	2	2	2	2	3	2	2	0	2	2	0	2	2	0	0	2	2	0	3	2	2	2	2	0	2	0	2	2	2	2	2	0	2	0	0
chr4:161139344-161191733	fixed_Ppa-Ptre-Ptrs-Ptrt-Ptrv	52389		0	2	2	2	2	2	2	0	2	0	0	2	2	2	2	2	2	2	0	2	2	0	2	2	0	0	2	2	0	2	2	2	2	2	0	2	0	2	2	2	2	2	0	2	0	0
chr4:161311456-161314381	fixed_Gbeg	2925		2	2	1	3	2	2	2	1	2	2	1	2	2	1	2	1	1	1	2	2	2	2	0	2	1	2	1	2	2	2	3	2	2	2	1	3	1	2	2	2	2	2	1	1	1	2
chr4:161448399-161455337	fixed_Ppa	6938		2	2	2	2	2	2	2	0	2	2	2	2	2	2	2	2	2	2	0	2	2	2	2	2	2	2	2	2	2	2	2	2	2	2	0	2	2	2	2	2	2	2	0	2	0	0
chr4:161996848-162012213	fixed_Pab-Ppy	15365		2	0	2	2	0	0	2	2	2	2	2	2	2	2	2	1	2	0	2	2	2	2	2	0	2	2	2	0	2	0	2	0	2	2	2	2	2	2	2	2	2	2	2	2	2	2
chr4:162813883-162815514	fixed_Pab-Ppy	1631	FSTL5	2	0	2	1	0	0	2	2	2	2	1	2	1	2	2	1	2	0	2	2	2	2	2	0	2	2	2	0	2	0	2	0	2	2	2	2	2	2	2	2	2	2	2	2	2	2
chr4:162886758-162887494	fixed_Ppa-Ptre-Ptrs-Ptrt-Ptrv	736	FSTL5	0	2	2	1	2	2	2	0	2	0	0	2	2	2	2	2	2	2	0	2	2	0	2	2	0	0	1	2	0	2	2	2	2	2	0	2	0	2	2	2	2	2	0	2	0	0
chr4:163005948-163009034	fixed_Pab-Ppy	3086	FSTL5	2	0	2	1	0	0	2	2	1	2	2	2	2	2	2	1	1	0	2	2	2	2	2	0	2	2	2	0	2	0	2	0	2	2	2	2	1	2	2	2	2	2	2	2	2	2
chr4:163519743-163521888	fixed_Pab-Ppy	2145		2	0	2	1	0	0	2	2	2	2	1	2	2	1	2	2	2	0	2	2	2	2	2	0	2	2	2	0	2	0	2	0	2	2	2	2	2	2	2	2	1	2	2	1	2	2
chr4:163884031-163888226	fixed_Ptre-Ptrs-Ptrt-Ptrv	4195		0	2	2	1	2	2	2	2	2	0	0	2	2	2	2	1	2	2	2	2	2	0	2	2	0	0	2	2	0	2	3	2	2	2	2	2	0	2	2	2	2	2	2	2	2	2
chr4:164041831-164043316	fixed_Pab-Ppy	1485		2	0	2	2	0	0	2	2	2	2	1	2	2	2	2	2	2	0	2	2	2	2	2	0	1	2	2	0	2	0	2	0	2	2	2	2	2	2	2	2	2	1	2	1	2	2
chr4:165848722-165851398	fixed_Ppa-Ptre-Ptrs-Ptrt-Ptrv	2676		0	1	1	1	1	1	2	0	1	0	0	2	1	2	1	1	1	1	0	1	2	0	1	1	0	0	2	1	0	1	1	1	2	2	0	2	0	1	1	2	2	1	0	2	0	0
chr4:166063185-166109117	Gbeg-Ggod-Ggog-Ppa-Ptre-Ptrs-Ptrt-Ptrv	45932	TRIM61,FAM218A	0	3	0	0	3	3	0	0	0	0	0	0	0	3	0	0	0	3	0	0	0	0	0	2	0	0	0	2	0	3	0	3	0	0	0	0	0	0	0	0	0	0	0	3	0	0
chr4:166117918-166130909	fixed_Ppa-Ptre-Ptrs-Ptrt-Ptrv	12991	TRIM61	0	2	2	2	2	2	2	0	2	0	0	2	2	2	2	1	2	2	0	2	2	0	2	2	0	0	2	2	0	2	1	2	2	2	0	2	0	2	2	2	2	2	0	2	0	0
chr4:166221821-166224265	fixed_Hsa	2444	TMEM192	1	2	2	1	1	2	2	2	2	2	1	2	1	0	1	2	2	2	2	2	2	2	1	2	2	2	2	2	2	1	2	1	2	2	2	2	2	2	1	2	2	2	2	0	2	2
chr4:166707302-166710919	fixed_Gbeg-Ggod-Ggog	3617		2	2	0	0	2	2	0	2	0	2	2	0	0	2	0	0	0	2	2	0	0	2	0	2	2	2	0	2	2	2	0	2	0	0	2	0	2	0	0	0	0	0	2	2	2	2
chr4:167535675-167539223	fixed_Ggod	3548		2	2	2	2	2	2	2	2	1	2	2	0	2	2	2	1	0	2	2	2	2	2	2	2	2	2	1	2	2	2	0	2	2	2	2	2	2	2	1	2	1	2	2	2	2	2
chr4:168038694-168040450	fixed_Pab-Ppy	1756	SPOCK3	2	0	2	2	0	0	2	2	2	2	1	2	2	2	2	1	2	0	2	2	2	2	2	0	1	2	1	0	2	0	2	0	2	2	2	2	1	2	2	1	2	2	2	2	2	2
chr4:168101261-168105274	fixed_Pab-Ppy	4013	SPOCK3	2	0	2	2	0	0	2	2	2	2	2	2	2	2	2	2	2	0	2	2	2	2	2	0	2	2	2	0	2	0	2	0	2	2	2	2	2	2	2	2	2	2	2	2	2	2
chr4:168801105-168806792	fixed_Ppa	5687		2	2	2	2	2	2	2	0	2	2	2	2	2	2	2	2	2	2	0	2	2	2	2	2	2	2	2	2	2	2	2	2	2	2	0	2	2	2	2	2	2	2	0	2	0	0
chr4:168979571-168982842	fixed_Ggod	3271		2	2	2	2	2	2	1	2	1	2	2	2	1	2	1	2	2	2	2	2	2	2	2	2	2	2	2	2	2	2	0	2	1	0	2	1	2	2	2	2	2	2	2	2	2	2
chr4:169329233-169333059	fixed_Pab-Ppy	3826	ANXA10	2	0	2	1	0	0	2	2	2	2	2	2	2	2	2	2	2	0	2	2	2	2	2	0	2	2	2	0	2	0	2	0	2	2	2	2	2	2	2	2	2	3	2	2	2	2
chr4:171549066-171550784	fixed_Pab-Ppy	1718		2	0	2	2	0	0	2	2	2	2	2	2	2	2	2	2	2	0	2	2	2	2	2	0	2	2	2	0	1	0	2	0	2	2	2	2	2	2	2	2	2	2	2	2	2	2
chr4:171607669-171609712	Gbeg-Ggod-Ggog-Ppa-Ptre-Ptrs-Ptrt-Ptrv	2043		0	2	0	0	2	1	0	0	0	0	0	0	0	2	0	0	0	1	0	0	0	0	0	2	0	0	0	2	0	2	0	2	0	0	0	0	0	0	0	0	0	0	0	2	0	0
chr4:171908563-171920316	fixed_Ppa	11753		2	2	2	2	1	2	2	0	1	1	1	2	1	2	2	1	1	2	0	2	1	1	2	1	2	1	1	2	2	2	2	2	2	2	0	2	2	2	2	1	2	2	0	2	0	0
chr4:171969295-171972438	fixed_Pab-Ppy	3143		2	0	2	2	0	0	2	2	2	2	2	2	2	2	2	2	2	0	2	2	2	2	2	0	2	2	2	0	2	0	2	0	2	2	2	2	2	2	2	2	2	2	2	2	2	2
chr4:172003262-172009501	fixed_Pab-Ppy	6239		2	0	2	2	0	0	2	2	2	2	2	2	2	2	2	2	2	0	2	2	2	2	2	0	2	2	2	0	2	0	2	0	2	2	2	2	2	2	2	2	2	2	2	2	2	2
chr4:172053240-172059528	Gbeg-Ggod-Ggog-Ppa-Ptre-Ptrs-Ptrt-Ptrv	6288		0	2	0	0	1	1	0	0	0	0	0	0	0	2	0	0	0	1	0	0	0	0	0	2	0	0	0	1	0	2	0	2	0	0	0	0	0	0	0	0	0	0	0	2	0	0
chr4:172459593-172467479	fixed_Gbeg-Ggod-Ggog	7886		2	2	0	0	2	2	0	2	0	2	2	0	0	2	0	0	0	3	2	0	0	2	0	2	1	2	0	2	2	2	0	2	0	0	2	0	1	0	0	0	0	0	2	2	2	2
chr4:172648339-172649133	Gbeg-Ggod-Ggog-Ppa-Ptre-Ptrs-Ptrt-Ptrv	794		0	1	0	0	1	1	0	0	0	0	0	0	0	2	0	0	0	2	0	0	0	0	0	2	0	0	0	1	0	1	0	1	0	0	0	0	0	0	0	0	0	0	0	2	0	0
chr4:172864161-172868588	fixed_Pab-Ppy	4427		2	0	2	2	0	0	2	2	2	2	2	2	2	2	2	1	2	0	2	2	2	2	2	0	2	2	1	0	2	0	2	0	2	2	2	2	2	2	2	2	2	2	1	2	2	2
chr4:173642450-173644281	fixed_Gbeg	1831	GALNTL6	2	2	2	2	2	2	2	2	2	2	2	2	2	2	2	2	3	2	2	2	2	2	0	1	2	2	2	2	2	2	2	1	2	2	2	2	2	2	2	2	2	2	2	2	2	2
chr4:174006070-174013323	fixed_Pab-Ppy	7253	GALNTL6	2	0	2	2	0	0	2	2	2	2	2	2	2	2	2	2	2	0	2	2	2	2	2	0	2	2	2	0	2	0	2	0	2	2	2	2	2	2	2	2	2	2	2	2	2	2
chr4:174514453-174516237	fixed_Pab-Ppy	1784		2	0	2	2	0	0	2	2	2	2	2	2	2	2	2	2	2	0	2	2	2	2	2	0	2	2	2	0	2	0	2	0	2	2	2	2	2	2	2	2	2	2	2	2	2	2
chr4:175243876-175244731	fixed_Pab-Ppy	855		1	0	1	1	0	0	2	2	2	1	1	2	2	1	2	1	1	0	2	2	1	2	2	0	2	2	1	0	1	0	2	0	1	2	2	2	2	2	1	1	2	2	2	1	2	2
chr4:175328195-175329393	fixed_Gbeg-Ggod-Ggog	1198		2	2	0	0	2	2	0	2	0	2	2	0	0	2	0	0	0	2	2	0	0	2	0	2	2	2	0	2	1	2	0	2	0	0	2	0	2	0	0	0	0	0	2	2	2	2
chr4:176192317-176199720	fixed_Pab	7403		2	0	2	2	2	0	2	2	2	2	2	2	2	2	2	1	2	2	2	2	2	2	2	2	2	1	2	2	1	2	2	0	2	2	2	2	2	2	2	2	2	2	2	2	2	2
chr4:176367540-176368956	fixed_Ppa-Ptre-Ptrs-Ptrt-Ptrv	1416		0	2	2	2	2	3	2	0	2	0	0	2	2	2	2	2	2	2	0	2	2	0	2	2	0	0	2	2	0	3	2	2	2	2	0	2	0	2	2	2	2	2	0	2	0	0
chr4:176627677-176632835	fixed_Ppa-Ptre-Ptrs-Ptrt-Ptrv	5158		0	2	2	2	1	2	2	0	2	0	0	2	2	2	2	2	2	2	0	2	2	0	2	1	0	0	2	1	0	2	2	1	2	2	0	2	0	2	2	2	2	2	0	2	0	0
[truncated: 877 more rows]
[truncated: 46 more columns]

## Sheet: S3 - fixed duplications
Table S3 - Lineage specific fixed duplications identified against the human reference genome Build 36
region	lineage	length	genes	Pan_troglodytes_verus-9668_Bosco	Pongo_abelii-A949_Dunja	Gorilla_gorilla_gorilla-A962_Amani	Gorilla_gorilla_gorilla-Snowflake	Pongo_pygmaeus-KB5405_Louis	Pongo_abelii-A953_Vicki	Gorilla_gorilla_gorilla-B650_Katie	Pan_paniscus-A923_Kombote	Gorilla_gorilla_gorilla-A935_Fritz	Pan_troglodytes_ellioti-Basho	Pan_troglodytes_ellioti-Tobi	Gorilla_gorilla_gorilla-9749_Kowali	Gorilla_gorilla_gorilla-KB6039_Oko	Homo_sapiens-San_HGDP01029	Gorilla_gorilla_gorilla-A932_Mimi	Gorilla_gorilla_gorilla-Kwan	Gorilla_gorilla_gorilla-KB3782_Vila	Pongo_pygmaeus-KB5406_Doris	Pan_paniscus-A926_Natalie	Gorilla_gorilla_gorilla-B644_Paki	Gorilla_gorilla_gorilla-KB3784_Dolly	Pan_troglodytes_ellioti-Julie	Gorilla_beringei_graueri-A929_Kaisi	Pongo_pygmaeus-KB5404_Billy	Pan_troglodytes_verus-X00100_Koby	Pan_troglodytes_ellioti-Damian	Gorilla_gorilla_gorilla-X00108_Abe	Pongo_pygmaeus-KB4204_Dinah	Pan_troglodytes_troglodytes-A960_Clara	Pongo_pygmaeus-A944_Napoleon	Gorilla_gorilla_dielhi-B646_Nyango	Pongo_abelii-A947_Elsi	Gorilla_gorilla_gorilla-KB5852_Helen	Gorilla_gorilla_gorilla-KB4986_Katie	Pan_paniscus-A951_Pongo	Gorilla_gorilla_gorilla-B643_Choomba	Pan_troglodytes_schweinfurthii-Yolanda	Gorilla_gorilla_gorilla-A933_Dian	Gorilla_gorilla_gorilla-9752_Suzie	Gorilla_gorilla_gorilla-X00109_Tzambo	Gorilla_gorilla_gorilla-9750_Azizi	Gorilla_gorilla_gorilla-KB7973_Porta	Pan_paniscus-X00095_Kakowet	Homo_sapiens-Sardinian_HGDP00665	Pan_paniscus-A925_Bono	Pan_paniscus-A918_Hermien
chr1:0-9680	Ggod-Ggog-Gbeg-Ptrs-Ptrt-Ptre-Ptrv-Ppa-Hsa-Hde	9680	DDX11L1,WASH7P,LOC100288778	4	2	9	7	2	2	7	4	9	4	4	8	8	30	7	7	7	2	4	7	7	4	8	2	4	4	8	2	5	2	6	2	9	8	4	6	4	7	8	7	8	8	4	23	5	4
chr1:9680-11980	ils_clades_HUMAN-EASTERN_GORILLA-WESTERN_GORILLA	2300	WASH7P	2	1	6	5	1	1	6	3	7	2	2	4	5	18	5	3	5	1	3	5	4	2	5	1	2	2	5	1	2	1	5	1	4	5	3	4	2	5	5	5	5	4	2	14	3	2
chr1:11980-24882	Ggod-Ggog-Gbeg-Ptrs-Ptrt-Ptre-Ptrv-Ppa-Hsa-Hde	12902	WASH7P,FAM138F,FAM138A	8	2	7	6	3	3	7	10	8	10	11	6	7	23	6	6	6	2	15	7	6	11	6	2	8	8	6	2	13	2	6	2	6	7	12	6	13	7	6	5	5	5	10	17	13	14
chr1:24882-30971	ils_clades_HUMAN-CHIMP	6089	FAM138F,FAM138A	5	2	2	1	2	2	2	2	2	5	3	2	3	17	2	1	2	2	2	3	2	3	2	1	5	5	2	2	4	2	2	2	2	2	2	2	4	1	2	2	2	2	2	13	2	2
chr1:30971-32723	ils_clades_HUMAN-BONOBO	1752		2	2	0	0	3	3	0	7	0	2	2	0	0	12	0	0	0	2	10	0	0	2	0	2	2	2	0	2	2	2	0	2	0	0	9	0	1	0	0	0	0	0	9	6	8	12
chr1:32723-44159	ils_clades_HUMAN-BONOBO-EASTERN_GORILLA-WESTERN_GORILLA	11436		3	2	4	3	2	2	4	9	4	2	2	4	3	11	4	3	3	2	11	4	4	2	4	2	2	2	4	2	2	2	5	2	4	3	9	4	2	4	4	4	4	4	10	5	8	14
chr1:45526-67744	ils_clades_HUMAN-BONOBO-EASTERN_GORILLA-WESTERN_GORILLA	22218	OR4F5	3	2	4	7	2	2	6	8	7	2	2	7	7	11	6	6	5	2	11	6	6	2	6	2	2	2	7	2	2	2	7	2	6	6	10	6	2	7	7	6	8	6	10	5	9	13
chr1:67744-77946	Ggod-Ggog-Gbeg-Ptrs-Ptrt-Ptre-Ptrv-Ppa-Hsa-Hde	10202		3	0	4	4	0	0	4	5	4	4	4	4	3	8	4	3	3	0	4	4	4	4	4	0	4	5	3	0	7	0	5	0	4	3	5	4	5	5	4	4	5	3	4	12	4	5
chr1:77946-81179	Ptrs-Ptrt-Ptre-Ptrv-Ppa-Hsa-Hde	3233		25	1	2	2	1	2	2	23	2	28	22	2	2	17	2	2	2	1	21	2	2	27	2	2	29	27	2	1	32	1	2	1	2	2	22	2	27	2	2	2	2	2	21	30	22	19
chr1:81179-115262	Ggod-Ggog-Gbeg-Ptrs-Ptrt-Ptre-Ptrv-Ppa-Hsa-Hde	34083		31	2	9	9	2	2	9	28	9	34	28	8	8	28	9	9	8	2	27	9	9	32	9	2	34	32	10	2	32	2	9	2	8	9	27	9	30	9	8	9	9	8	28	42	27	26
chr1:115262-166846	Pab-Ppy-Ggod-Ggog-Gbeg-Ptrs-Ptrt-Ptre-Ptrv-Ppa-Hsa-Hde	51584	LOC729737	37	44	68	72	51	48	65	31	68	30	27	65	63	37	64	59	66	46	30	68	65	31	67	50	33	30	63	45	34	49	64	45	65	62	28	58	29	69	67	60	69	66	30	45	30	31
chr1:217160-225853	Pab-Ppy-Ggod-Ggog-Gbeg-Ptrs-Ptrt-Ptre-Ptrv-Ppa-Hsa-Hde	8693		7	18	8	7	15	19	9	9	8	9	8	8	9	37	8	8	8	14	8	8	8	9	8	13	10	9	10	16	11	17	8	17	9	9	9	9	9	8	8	8	8	9	8	48	8	7
chr1:229278-257703	Ggod-Ggog-Gbeg-Ptrs-Ptrt-Ptre-Ptrv-Ppa-Hsa-Hde	28425		27	2	8	8	2	2	8	26	8	32	26	8	8	27	8	8	8	2	24	8	8	30	8	2	32	29	9	2	28	2	8	2	8	8	24	9	28	8	8	8	8	8	26	39	26	23
chr1:307203-327562	Pab-Ppy-Ggod-Ggog-Gbeg-Ptrs-Ptrt-Ptre-Ptrv-Ppa-Hsa-Hde	20359	LOC100132062,LOC100132287,LOC100133331	215	14	196	194	19	13	122	81	215	147	118	200	179	48	212	183	178	23	83	145	190	188	223	20	191	174	206	18	162	20	132	15	200	189	80	109	172	237	193	185	199	202	83	58	109	85
chr1:327562-342168	Ggod-Ggog-Gbeg-Ptrs-Ptrt-Ptre-Ptrv-Ppa-Hsa-Hde	14606		38	2	13	12	2	2	14	41	13	41	38	13	13	38	13	12	14	2	41	13	13	41	14	2	41	41	14	2	39	2	14	2	13	13	41	14	32	13	13	13	12	13	40	50	39	42
chr1:342168-361601	Ptrs-Ptrt-Ptre-Ptrv-Ppa-Hsa-Hde	19433	OR4F16,OR4F29,OR4F3	9	0	0	0	0	0	0	16	0	9	8	0	0	19	0	0	0	0	16	0	0	9	0	0	8	9	0	0	8	0	0	0	0	0	16	0	10	0	0	0	0	0	15	16	16	19
chr1:361601-425244	Ggod-Ggog-Gbeg-Ptrs-Ptrt-Ptre-Ptrv-Ppa-Hsa-Hde	63643		5	2	8	8	2	2	8	5	8	5	4	8	8	19	8	8	8	2	5	8	8	5	8	2	5	5	8	2	5	2	8	2	8	8	5	8	3	9	8	8	8	8	5	22	5	5
chr1:428550-449806	Hsa-Hde	21256		2	2	2	2	1	2	2	2	1	2	1	2	2	10	2	2	2	1	2	1	2	2	2	2	2	2	2	2	2	2	2	2	2	2	2	1	2	1	2	2	2	2	2	14	2	2
chr1:449806-453502	Ptrs-Ptrt-Ptre-Ptrv-Ppa-Hsa-Hde	3696		10	1	1	1	1	1	1	9	1	11	9	1	1	11	1	1	1	1	9	1	1	11	1	1	11	10	1	1	12	1	1	1	1	1	9	1	12	1	1	1	1	1	9	17	9	9
chr1:453502-461452	Pab-Ppy-Ggod-Ggog-Gbeg-Ptrs-Ptrt-Ptre-Ptrv-Ppa-Hsa-Hde	7950		9	19	11	9	17	19	11	11	11	9	8	10	11	37	11	10	10	16	10	11	10	9	10	15	9	9	11	16	12	18	10	17	11	11	11	11	9	10	11	10	11	11	10	49	10	10
chr1:510952-513612	Ptrs-Ptrt-Ptre-Ptrv-Ppa-Hsa-Hde	2660		6	1	1	1	1	1	1	6	1	8	7	1	1	10	1	1	1	1	6	1	1	8	1	1	10	8	1	1	8	1	1	1	1	1	6	1	11	1	1	1	1	1	7	15	5	6
chr1:513612-536246	Hsa-Hde	22634		2	2	2	2	1	1	2	2	2	2	1	1	2	10	2	2	2	1	2	1	2	2	2	2	2	2	2	2	2	1	1	2	2	2	2	1	2	2	2	2	2	2	2	14	2	2
chr1:536246-553758	Ggod-Ggog-Gbeg-Ptrs-Ptrt-Ptre-Ptrv-Ppa-Hsa-Hde	17512		4	2	7	8	2	2	8	4	8	4	3	8	8	17	8	8	7	2	4	8	8	4	8	2	4	4	9	2	4	2	8	2	8	8	4	8	2	8	8	8	8	8	4	21	4	4
chr1:553758-559918	Pab-Ppy-Ggod-Ggog-Gbeg-Ptrs-Ptrt-Ptre-Ptrv-Ppa-Hsa-Hde	6160		69	50	28	35	53	26	22	51	26	57	99	29	59	2523	20	50	86	74	36	20	219	95	22	107	377	77	375	15	27	14	28	15	79	157	280	25	97	45	43	220	49	857	404	1276	38	52
chr1:559918-607772	Ggod-Ggog-Gbeg-Ptrs-Ptrt-Ptre-Ptrv-Ppa-Hsa-Hde	47854		18	2	9	8	2	2	8	19	8	15	16	8	8	25	8	9	8	1	17	8	8	18	8	2	17	17	9	2	11	2	8	2	8	8	18	9	18	8	8	8	9	8	17	37	17	20
chr1:607772-627266	Ptrs-Ptrt-Ptre-Ptrv-Ppa-Hsa-Hde	19494	OR4F3,OR4F16,OR4F29	10	0	0	0	0	0	0	16	0	9	8	0	0	19	0	0	0	0	16	0	0	9	0	0	8	9	0	0	7	0	0	0	0	0	16	0	10	0	0	0	0	0	15	17	16	19
chr1:627266-652295	Ggod-Ggog-Gbeg-Ptrs-Ptrt-Ptre-Ptrv-Ppa-Hsa-Hde	25029	LOC100133331	39	2	12	13	2	3	14	40	13	39	35	14	13	38	13	15	14	2	38	13	13	40	13	2	38	40	17	2	39	2	13	2	13	13	42	13	35	13	15	14	14	13	41	49	38	41
chr1:652295-720190	Pab-Ppy-Ggod-Ggog-Gbeg-Ptrs-Ptrt-Ptre-Ptrv-Ppa-Hsa-Hde	67895	LOC100133331,LOC100288069	33	47	72	77	51	51	71	28	75	27	24	73	68	36	67	65	68	46	27	74	66	28	72	50	33	28	73	46	27	53	68	48	69	66	26	63	28	75	74	70	76	71	29	43	27	28
chr1:720190-728776	ils_clades_HUMAN-CHIMP	8586		15	2	2	2	2	2	2	5	2	12	12	1	1	6	2	1	2	2	2	2	1	11	2	2	12	13	1	1	15	1	2	2	2	2	3	1	13	2	2	2	2	2	2	7	3	3
chr1:728776-785237	Ggod-Ggog-Gbeg-Ptrs-Ptrt-Ptre-Ptrv-Ppa-Hsa-Hde	56461	LINC00115,LOC643837	12	2	9	8	2	2	8	6	9	13	12	9	8	5	8	9	8	2	6	8	8	11	9	2	12	13	8	2	15	2	9	2	9	8	7	8	13	9	9	9	9	9	6	5	7	8
chr1:785237-786484	Pab-Ppy-Ggod-Ggog-Gbeg-Ptrs-Ptrt-Ptre-Ptrv-Ppa-Hsa-Hde	1247		18	12	17	14	10	13	17	16	15	21	17	15	15	9	16	15	15	11	13	15	16	20	16	11	20	20	17	12	22	9	15	13	18	15	14	17	22	16	17	15	16	17	14	9	13	13
chr1:786484-791176	Ggod-Ggog-Gbeg-Ptrs-Ptrt-Ptre-Ptrv-Ppa-Hsa-Hde	4692		9	2	11	10	2	2	10	6	10	11	11	9	9	4	10	11	9	2	7	9	10	10	10	2	10	11	9	2	12	2	10	2	9	10	6	9	12	11	10	9	10	9	6	4	7	6
chr1:791176-816401	Pab-Ppy-Ggod-Ggog-Gbeg-Ptrs-Ptrt-Ptre-Ptrv-Ppa-Hsa-Hde	25225	FAM41C	15	25	10	12	24	24	11	16	11	18	15	10	10	15	10	11	10	21	17	11	11	16	11	23	16	17	11	24	19	27	11	26	11	10	16	11	18	11	11	11	11	11	18	18	17	17
chr1:824071-918453	Ptrs-Ptrt-Ptre-Ptrv	94382	LOC100130417,SAMD11,NOC2L,KLHL17,PLEKHN1,C1orf170	5	2	1	1	2	2	1	2	1	7	7	2	2	2	2	2	2	2	2	1	2	6	1	2	5	7	2	2	8	2	1	2	2	2	2	1	8	2	2	2	2	2	2	2	2	2
chr1:932436-1017861	Pab-Ppy-Ggod-Ggog-Gbeg-Ptrs-Ptrt-Ptre-Ptrv-Ppa-Hsa-Hde	85425	ISG15,AGRN,RNF223,C1orf159	14	17	14	13	15	19	14	13	13	12	10	15	12	13	14	9	12	16	13	16	11	12	12	13	12	13	12	16	12	15	14	16	11	12	13	17	12	12	14	11	14	13	13	13	12	13
chr1:1375182-1388542	Pab-Ppy-Ggod-Ggog-Gbeg-Ptrs-Ptrt-Ptre-Ptrv-Ppa-Hsa-Hde	13360	ATAD3C	4	3	3	3	3	3	4	5	4	5	4	4	7	5	5	3	4	3	4	3	4	5	3	4	5	5	4	3	6	3	2	3	4	6	4	2	5	5	6	3	5	4	4	5	4	4
chr1:1401449-1416131	Pab-Ppy-Ggod-Ggog-Gbeg-Ptrs-Ptrt-Ptre-Ptrv-Ppa-Hsa-Hde	14682	ATAD3B	4	3	4	4	4	2	3	6	6	5	3	5	7	6	5	4	4	4	4	3	4	6	3	4	4	5	5	4	7	4	2	3	5	7	4	1	6	6	6	3	5	4	4	6	4	4
chr1:1422230-1455448	Pab-Ppy-Ggod-Ggog-Gbeg-Ptrs-Ptrt-Ptre-Ptrv-Ppa-Hsa-Hde	33218	ATAD3A	4	3	4	4	4	2	4	5	5	5	4	5	8	5	5	3	5	4	4	3	5	6	4	4	5	5	5	4	6	4	3	3	5	6	4	2	6	6	6	5	6	4	4	6	3	3
chr1:1572787-1574226	ils_clades_HUMAN-ORANGUTAN-EASTERN_GORILLA-WESTERN_GORILLA	1439	CDK11B	2	4	5	4	3	4	4	2	5	2	2	4	4	5	4	5	4	3	2	4	4	2	5	3	2	3	6	3	2	3	4	4	4	4	2	4	2	4	4	4	3	3	2	5	2	3
chr1:1593231-1595525	Pab-Ppy-Ggod-Ggog-Gbeg-Ptrs-Ptrt-Ptre-Ptrv-Ppa-Hsa-Hde	2294	CDK11B,SLC35E2B	3	4	4	3	4	4	4	4	4	3	3	4	4	5	4	3	4	5	4	3	3	3	4	4	3	4	4	3	4	3	3	4	4	4	3	3	3	4	4	3	4	4	3	5	3	4
chr1:1600484-1610550	Ggod-Ggog-Gbeg	10066	CDK11B,SLC35E2B	1	2	3	3	1	2	3	2	4	2	2	4	4	2	3	4	4	1	2	3	3	2	4	2	2	2	5	2	2	1	3	2	3	4	2	3	2	3	4	3	3	4	2	2	2	2
chr1:1630881-1637532	ils_clades_HUMAN-ORANGUTAN-EASTERN_GORILLA-WESTERN_GORILLA	6651	CDK11B,CDK11A	2	4	4	4	3	4	4	2	4	2	2	4	4	5	3	4	4	3	2	4	4	2	4	3	2	2	6	2	2	3	4	4	4	4	2	4	2	4	4	4	3	4	2	5	2	2
chr1:1637532-1644194	ils_clades_HUMAN-ORANGUTAN-WESTERN_GORILLA	6662	CDK11B,CDK11A	1	3	4	3	2	3	2	1	3	1	1	3	3	4	2	3	3	3	2	2	3	2	3	3	1	1	4	2	2	2	2	3	4	3	2	2	2	3	2	3	3	2	2	4	1	2
chr1:1648737-1649237	ils_clades_HUMAN-EASTERN_GORILLA-WESTERN_GORILLA	500	SLC35E2	2	2	4	4	1	2	3	2	4	2	2	3	4	5	3	4	5	2	2	3	3	2	4	2	2	2	5	1	3	2	3	2	4	4	2	4	2	4	3	4	3	4	2	5	2	2
chr1:1649237-1651977	ils_clades_HUMAN-ORANGUTAN-EASTERN_GORILLA-WESTERN_GORILLA	2740	SLC35E2	2	3	4	4	3	3	4	2	3	2	2	3	4	4	2	3	5	2	2	3	3	2	4	3	2	2	5	2	2	2	3	3	4	4	2	4	2	4	4	4	3	3	2	4	2	2
chr1:1655973-1658446	Pab-Ppy-Ggod-Ggog-Gbeg-Ptrs-Ptrt-Ptre-Ptrv-Ppa-Hsa-Hde	2473	SLC35E2	3	5	5	4	4	5	5	4	5	3	3	5	5	6	4	5	5	5	3	4	4	3	5	4	3	3	6	3	3	4	4	5	5	5	3	4	3	5	5	4	4	5	3	5	3	3
chr1:1673155-1681725	Hsa-Hde	8570	NADK	2	2	2	1	2	1	1	1	2	2	2	3	3	4	2	3	2	2	1	1	2	2	2	2	2	1	4	2	1	2	1	1	2	2	1	1	1	2	2	2	2	3	2	3	1	1
chr1:4796837-4798229	Ggod	1392		2	3	2	2	2	3	2	2	3	2	2	3	2	2	2	2	2	3	3	2	2	2	2	2	2	2	2	2	2	2	4	2	3	2	3	3	2	2	2	2	2	3	2	2	3	2
chr1:5003897-5226245	Ggod-Ggog-Gbeg	222348		2	2	4	4	2	2	4	2	4	2	2	4	4	2	4	4	4	2	2	4	4	2	6	2	2	2	4	2	2	2	2	2	4	4	2	4	2	4	4	4	4	4	2	2	2	2
chr1:5636292-5640711	Pab-Ppy-Ggod-Ggog-Gbeg-Ptrs-Ptrt-Ptre-Ptrv-Ppa-Hsa-Hde	4419		10	56	6	6	61	56	6	7	7	14	8	6	6	11	6	6	6	58	7	6	6	8	6	65	12	12	8	64	8	73	6	66	6	6	8	7	10	6	6	7	6	7	11	10	11	8
chr1:5648401-5659198	Pab-Ppy-Ggod-Ggog-Gbeg-Ptrs-Ptrt-Ptre-Ptrv-Ppa-Hsa-Hde	10797		11	83	7	7	100	89	9	8	9	11	7	7	6	12	7	6	7	93	8	8	7	6	7	108	10	10	8	108	6	105	8	95	6	7	8	9	7	6	7	9	8	7	14	13	14	9
chr1:5831635-5833511	Pab-Ppy-Ggod-Ggog-Gbeg-Ptrs-Ptrt-Ptre-Ptrv-Ppa-Hsa-Hde	1876		14	59	17	17	19	30	12	14	11	12	17	12	20	100	11	12	27	27	10	13	60	18	11	35	58	14	102	8	7	10	15	15	23	45	51	17	16	18	14	53	16	259	60	54	10	13
chr1:6168567-6170476	Pab-Ppy-Ggod-Ggog-Gbeg-Ptrs-Ptrt-Ptre-Ptrv-Ppa-Hsa-Hde	1909	RPL22	4	4	5	4	3	4	4	4	4	3	4	4	4	6	5	4	5	4	4	4	5	4	5	4	3	4	4	4	5	3	4	3	5	4	4	5	4	4	5	4	4	5	3	7	4	4
chr1:6413883-6421148	ils_clades_HUMAN-CHIMP-BONOBO-ORANGUTAN	7265	ESPN	4	6	2	2	6	5	1	4	2	4	3	2	2	6	2	2	3	8	4	2	2	4	2	6	4	4	2	7	4	6	2	7	2	2	4	2	4	2	2	2	2	2	4	6	4	4
chr1:6421148-6427351	ils_clades_HUMAN-CHIMP-ORANGUTAN	6203	ESPN	4	3	1	1	7	3	1	2	1	3	2	2	2	6	1	2	2	8	1	1	2	4	1	6	5	4	3	8	3	3	1	3	2	1	2	1	4	1	3	1	2	2	4	6	2	2
chr1:6427351-6440273	ils_clades_HUMAN-CHIMP-BONOBO-ORANGUTAN	12922	ESPN	3	7	2	2	7	5	1	4	3	4	3	2	2	6	2	2	2	10	4	2	2	4	2	7	4	4	2	7	5	7	1	7	2	2	4	1	4	2	2	2	2	2	4	6	4	3
chr1:6648784-6649694	Pab-Ppy-Ggod-Ggog-Gbeg-Ptrs-Ptrt-Ptre-Ptrv-Ppa-Hsa-Hde	910	DNAJC11	4	4	4	4	3	4	4	4	4	4	3	4	4	4	4	2	4	3	5	3	3	4	4	3	3	4	3	3	5	4	3	4	4	4	4	4	3	3	4	4	4	4	3	4	4	5
chr1:8039662-8046342	Pab-Ppy-Ggod-Ggog-Gbeg-Ptrs-Ptrt-Ptre-Ptrv-Ppa-Hsa-Hde	6680		9	12	10	10	10	12	11	10	9	8	8	9	9	10	10	9	9	11	11	10	9	9	10	10	9	8	10	9	9	12	10	12	9	9	10	10	9	10	9	9	9	9	10	11	10	9
chr1:8594329-8597043	ils_clades_HUMAN-CHIMP-EASTERN_GORILLA-WESTERN_GORILLA	2714	RERE	3	2	11	12	2	2	10	2	12	3	3	9	11	9	11	14	11	2	2	11	9	4	11	2	4	3	14	2	4	2	14	2	12	12	2	12	3	14	10	13	12	11	2	5	2	2
chr1:8597043-8599015	Hsa	1972	RERE	2	2	2	2	2	2	2	2	2	2	2	2	2	4	2	2	2	2	2	2	2	2	2	2	2	2	2	2	2	2	2	2	2	2	2	2	2	2	2	2	2	2	2	4	2	2
chr1:8600413-8608505	ils_clades_HUMAN-CHIMP-EASTERN_GORILLA-WESTERN_GORILLA	8092	RERE	3	2	11	13	2	2	10	2	14	4	3	9	12	10	12	14	13	2	2	11	10	4	12	2	3	4	15	2	4	2	14	2	13	12	2	13	4	13	11	14	14	10	2	6	2	2
chr1:8637189-8641735	ils_clades_HUMAN-CHIMP-EASTERN_GORILLA-WESTERN_GORILLA	4546	RERE	3	2	14	14	2	2	11	2	15	3	2	10	12	8	13	12	13	2	2	11	10	3	12	2	4	3	16	2	4	2	15	2	13	13	2	12	3	13	12	15	14	12	2	4	2	2
chr1:8731561-8734290	Pab-Ppy-Ggod-Ggog-Gbeg-Ptrs-Ptrt-Ptre-Ptrv-Ppa-Hsa-Hde	2729	RERE	18	20	23	20	17	21	24	20	23	19	17	21	23	20	22	25	23	18	20	22	22	19	22	19	19	19	22	16	19	19	23	20	21	22	19	23	20	24	20	21	20	22	19	21	19	21
chr1:8767809-8772286	Pab-Ppy-Ggod-Ggog-Gbeg-Ptrs-Ptrt-Ptre-Ptrv-Ppa-Hsa-Hde	4477	RERE	8	9	10	8	8	9	11	9	10	7	7	10	10	8	10	9	9	8	8	9	10	8	9	8	7	7	9	8	9	9	10	9	9	10	9	11	8	10	8	8	9	9	8	8	8	9
chr1:8805955-8819389	Pab-Ppy-Ggod-Ggog-Gbeg-Ptrs-Ptrt-Ptre-Ptrv-Ppa-Hsa-Hde	13434		4	5	4	4	5	5	5	5	5	4	4	4	4	5	4	3	4	5	4	4	4	4	4	6	4	5	4	5	5	6	4	5	4	5	5	4	4	4	4	4	4	4	4	5	5	5
chr1:8876212-8886595	Pab-Ppy-Ggod-Ggog-Gbeg-Ptrs-Ptrt-Ptre-Ptrv-Ppa-Hsa-Hde	10383		30	34	35	31	32	36	32	33	32	33	28	31	32	37	31	34	33	33	33	31	31	31	31	35	34	31	35	31	35	33	32	34	33	32	34	34	36	33	30	31	30	32	34	37	32	34
chr1:8888404-8892484	Pab-Ppy-Ggod-Ggog-Gbeg-Ptrs-Ptrt-Ptre-Ptrv-Ppa-Hsa-Hde	4080		13	51	18	17	53	28	12	12	13	11	12	15	25	4	11	18	34	85	10	12	84	13	5	103	57	15	148	19	7	20	14	13	28	59	51	15	13	20	20	71	23	332	68	16	8	12
chr1:9556220-9561701	Pab-Ppy-Ggod-Ggog-Gbeg-Ptrs-Ptrt-Ptre-Ptrv-Ppa-Hsa-Hde	5481	SLC25A33	5	6	6	6	6	7	6	5	6	6	5	5	5	6	5	5	6	6	5	6	6	6	6	6	6	6	5	6	6	6	6	6	6	5	5	5	6	5	5	5	5	6	5	6	5	5
chr1:10035115-10037815	Pab-Ppy-Ggod-Ggog-Gbeg-Ptrs-Ptrt-Ptre-Ptrv-Ppa-Hsa-Hde	2700	UBE4B	17	19	16	14	19	19	17	19	16	18	16	16	17	16	16	19	18	20	18	17	15	17	16	20	21	17	19	18	20	19	16	19	17	16	18	16	22	16	17	18	16	17	21	17	18	19
chr1:10102657-10105305	Pab-Ppy	2648	UBE4B	2	4	2	2	4	4	2	2	2	2	2	2	2	2	2	2	2	4	2	2	2	2	2	4	2	2	2	4	2	4	2	4	1	2	2	2	2	2	2	2	2	2	2	3	2	2
chr1:11004800-11006711	Pab-Ppy-Ggod-Ggog-Gbeg-Ptrs-Ptrt-Ptre-Ptrv-Ppa-Hsa-Hde	1911	TARDBP	6	6	7	6	6	7	6	7	6	6	5	6	6	8	6	6	6	6	6	6	5	6	6	6	7	6	6	6	7	6	6	6	6	6	7	6	6	6	6	6	5	6	6	8	7	6
chr1:11214780-11216435	Pab-Ppy-Ggod-Ggog-Gbeg-Ptrs-Ptrt-Ptre-Ptrv-Ppa-Hsa-Hde	1655	MTOR	9	9	9	7	9	8	8	8	8	9	8	9	9	9	8	11	10	10	9	9	8	9	8	9	9	9	10	8	9	9	8	8	8	9	8	8	10	8	9	8	9	8	9	9	9	8
chr1:11975110-11976838	Pab-Ppy-Ggod-Ggog-Gbeg-Ptrs-Ptrt-Ptre-Ptrv-Ppa-Hsa-Hde	1728	MFN2	4	6	6	5	6	7	6	5	5	4	4	5	5	5	6	5	6	6	5	5	5	5	5	6	5	5	5	5	6	6	6	6	5	5	5	6	5	5	5	5	6	5	4	6	5	4
chr1:12062179-12063846	Pab-Ppy-Ggod-Ggog-Gbeg-Ptrs-Ptrt-Ptre-Ptrv-Ppa-Hsa-Hde	1667	TNFRSF8	10	11	11	10	9	11	12	10	10	10	9	9	9	10	10	8	9	10	11	9	9	10	10	10	11	10	9	11	11	10	10	10	9	9	11	10	9	10	8	10	9	11	9	11	10	10
chr1:12118774-12120084	Pab-Ppy-Ggod-Ggog-Gbeg-Ptrs-Ptrt-Ptre-Ptrv-Ppa-Hsa-Hde	1310	TNFRSF8	4	4	4	4	3	4	4	4	4	3	3	4	4	4	4	3	3	4	4	3	3	3	4	4	3	4	4	4	5	4	3	4	3	4	4	4	4	4	4	3	4	4	3	4	4	4
chr1:12757502-12883937	Pab-Ppy-Ggod-Ggog-Gbeg-Ptrs-Ptrt-Ptre-Ptrv-Ppa-Hsa-Hde	126435	PRAMEF12,PRAMEF1,PRAMEF11,LOC649330,HNRNPCL1,PRAMEF2,PRAMEF4,PRAMEF10	14	11	21	20	11	11	15	26	29	22	9	18	23	11	16	22	25	9	28	14	14	19	17	11	27	21	19	12	19	10	27	11	22	23	20	40	20	21	18	13	21	19	30	11	21	25
chr1:12883937-12897163	Ggod-Ggog-Gbeg-Ptrs-Ptrt-Ptre-Ptrv-Ppa-Hsa-Hde	13226		12	3	5	5	3	3	6	18	10	16	4	6	8	5	5	5	9	2	19	5	4	14	2	2	21	17	6	3	13	2	10	3	3	7	14	15	17	6	7	3	7	4	20	5	13	18
chr1:12897163-12975662	Pab-Ppy-Ggod-Ggog-Gbeg-Ptrs-Ptrt-Ptre-Ptrv-Ppa-Hsa-Hde	78499	PRAMEF8,PRAMEF7,PRAMEF6,PRAMEF22	14	9	14	14	8	9	12	23	20	20	9	13	15	8	11	14	17	7	23	10	10	16	11	9	25	22	14	9	18	8	19	9	13	14	16	26	20	15	13	9	15	13	27	9	17	20
chr1:13025662-13142141	Pab-Ppy-Ggod-Ggog-Gbeg-Ptrs-Ptrt-Ptre-Ptrv-Ppa-Hsa-Hde	116479	PRAMEF5,LOC440563	14	10	19	18	10	10	15	24	27	21	9	18	21	10	16	19	24	9	24	15	15	18	19	10	25	21	18	11	19	9	27	10	20	22	18	35	20	18	18	12	20	17	29	11	19	23
chr1:13199917-13262460	Pab-Ppy-Ggod-Ggog-Gbeg-Ptrs-Ptrt-Ptre-Ptrv-Ppa-Hsa-Hde	62543	PRAMEF22,PRAMEF3,PRAMEF5,PRAMEF6,PRAMEF8	14	9	14	14	9	8	12	23	19	20	9	13	15	8	11	15	17	7	23	10	10	17	12	8	25	22	14	9	19	8	19	9	13	14	16	26	20	15	12	9	15	13	28	9	16	19
chr1:13262460-13262960	Ggod-Ggog-Gbeg-Ptrs-Ptrt-Ptre-Ptrv-Ppa-Hsa-Hde	500	PRAMEF8	10	2	6	3	1	2	3	15	8	14	4	6	7	4	4	5	8	2	15	4	4	12	1	2	18	15	6	2	13	2	7	2	3	6	11	11	15	5	7	3	7	4	18	4	10	13
chr1:13262960-13400875	Pab-Ppy-Ggod-Ggog-Gbeg-Ptrs-Ptrt-Ptre-Ptrv-Ppa-Hsa-Hde	137915	PRAMEF8,PRAMEF15,PRAMEF9,PRAMEF14,PRAMEF18,PRAMEF19,PRAMEF16,PRAMEF20,PRAMEF21	12	11	15	15	10	10	13	19	20	17	8	13	16	8	11	15	18	9	19	10	10	15	12	10	22	18	15	11	15	9	19	11	16	14	15	27	17	15	13	10	15	14	21	8	14	19
chr1:13479685-13486054	Pab-Ppy-Ggod-Ggog-Gbeg-Ptrs-Ptrt-Ptre-Ptrv-Ppa-Hsa-Hde	6369	PRAMEF8,PRAMEF7	11	5	9	7	4	5	6	15	12	19	6	7	11	6	6	8	12	4	17	6	6	15	4	4	24	21	9	4	15	4	10	5	6	9	12	16	18	8	9	5	9	6	20	6	12	14
chr1:13486054-13489386	Ggod-Ggog-Gbeg-Ptrs-Ptrt-Ptre-Ptrv-Ppa-Hsa-Hde	3332		12	2	5	5	3	3	6	19	9	16	4	6	8	5	5	5	10	2	19	5	5	14	2	2	20	18	6	3	13	2	10	3	3	7	14	15	17	6	7	3	7	4	20	5	13	16
chr1:13499712-13621712	Pab-Ppy-Ggod-Ggog-Gbeg-Ptrs-Ptrt-Ptre-Ptrv-Ppa-Hsa-Hde	122000	PRAMEF9,PRAMEF15,PRAMEF14,PRAMEF13,PRAMEF19,PRAMEF18,PRAMEF17,PRAMEF20,PRAMEF21	13	11	16	17	11	11	13	22	21	19	9	15	17	10	12	18	21	10	23	12	12	17	14	11	22	18	15	13	18	10	20	11	19	17	16	31	17	16	15	11	17	15	26	10	18	22
chr1:15662518-15665862	Pab-Ppy-Ggod-Ggog-Gbeg-Ptrs-Ptrt-Ptre-Ptrv-Ppa-Hsa-Hde	3344	CELA2A	3	5	3	4	4	5	3	4	4	4	3	3	3	4	3	4	4	4	4	3	3	4	3	4	4	3	4	4	4	4	3	6	3	3	4	3	3	4	3	3	4	3	4	4	4	4
chr1:15803038-15804348	Pab-Ppy-Ggod-Ggog-Gbeg-Ptrs-Ptrt-Ptre-Ptrv-Ppa-Hsa-Hde	1310		8	8	8	7	8	8	8	7	7	7	6	9	7	8	6	7	8	8	6	6	8	7	8	9	7	7	8	10	7	9	6	9	8	8	6	7	7	7	8	7	8	9	7	7	6	6
chr1:15991943-15995103	Pab-Ppy-Ggod-Ggog-Gbeg-Ptrs-Ptrt-Ptre-Ptrv-Ppa-Hsa-Hde	3160		18	34	21	19	33	33	20	21	20	18	16	20	19	20	21	22	19	32	19	18	19	18	19	35	18	21	20	35	22	31	18	32	19	20	20	21	18	20	21	21	20	21	20	21	21	19
chr1:16024976-16027777	Pab-Ppy-Ggod-Ggog-Gbeg-Ptrs-Ptrt-Ptre-Ptrv-Ppa-Hsa-Hde	2801		5	8	6	5	7	8	6	6	6	6	5	6	6	6	6	6	5	8	6	6	6	6	6	8	6	6	6	9	7	8	4	8	6	5	6	5	5	6	6	6	5	7	6	4	6	6
chr1:16567825-16568602	Pab-Ppy-Ggod-Ggog-Gbeg-Ptrs-Ptrt-Ptre-Ptrv-Ppa-Hsa-Hde	777	C1orf144	5	5	5	5	5	5	5	5	5	4	4	5	5	6	5	5	5	5	5	5	5	5	5	5	4	5	6	5	6	5	5	5	5	5	5	5	5	5	6	5	5	6	5	6	4	5
chr1:16617245-16626526	Pab-Ppy	9281	SPATA21	2	4	2	2	4	4	2	2	2	2	1	2	1	2	2	2	2	5	2	2	2	2	2	4	2	2	2	4	2	4	2	4	2	2	2	2	2	2	2	2	2	2	2	2	2	2
chr1:16683849-16836230	Pab-Ppy-Ggod-Ggog-Gbeg-Ptrs-Ptrt-Ptre-Ptrv-Ppa-Hsa-Hde	152381	CROCCP3,MIR3675,NBPF1,CROCCP2	13	14	22	19	13	12	20	17	19	16	14	20	20	20	21	20	19	15	16	20	19	11	21	13	14	16	20	13	14	13	21	13	21	19	18	21	15	20	17	19	21	20	13	16	18	19
chr1:16851114-16855158	Ggod-Ggog-Gbeg-Ptrs-Ptrt-Ptre-Ptrv-Ppa-Hsa-Hde	4044		16	2	14	8	2	2	6	17	12	12	13	12	15	15	13	8	10	2	16	13	9	11	10	2	11	10	12	2	13	2	9	2	10	12	20	8	12	8	11	13	9	11	15	11	18	21
chr1:16855158-16882614	Pab-Ppy-Ggod-Ggog-Gbeg-Ptrs-Ptrt-Ptre-Ptrv-Ppa-Hsa-Hde	27456	MIR3675	14	11	22	15	9	10	15	17	16	16	15	18	20	19	20	17	16	11	15	18	17	13	17	11	14	15	19	10	15	10	17	10	18	15	18	17	16	15	13	17	20	17	14	14	18	20
chr1:16885355-16887366	Pab-Ppy-Ggod-Ggog-Gbeg-Ptrs-Ptrt-Ptre-Ptrv-Ppa-Hsa-Hde	2011		12	16	12	13	15	14	14	16	11	14	13	10	10	13	12	10	10	19	15	12	10	11	15	14	11	14	10	13	12	15	15	15	12	11	17	13	13	13	10	9	10	12	13	11	17	19
chr1:16887366-16919740	ils_clades_HUMAN-CHIMP-BONOBO-ORANGUTAN	32374	ESPNP	4	6	1	1	7	4	1	4	2	4	3	2	2	7	1	2	2	9	4	1	2	4	2	6	4	4	2	7	4	6	1	6	2	2	4	1	4	2	2	2	2	2	4	8	4	4
chr1:16920745-16950112	Pab-Ppy-Ggod-Ggog-Gbeg-Ptrs-Ptrt-Ptre-Ptrv-Ppa-Hsa-Hde	29367		13	10	21	16	11	10	16	16	18	16	14	19	22	19	20	18	18	10	15	19	18	11	19	10	14	16	18	10	14	10	17	10	19	16	18	20	15	15	15	18	20	18	13	15	17	17
chr1:16950112-16954996	Ggod-Ggog-Gbeg-Ptrs-Ptrt-Ptre-Ptrv-Ppa-Hsa-Hde	4884	MST1P9	15	2	12	7	2	2	6	16	10	11	11	9	12	14	11	8	9	2	14	11	7	11	8	2	11	9	11	2	13	2	9	2	9	9	19	7	10	7	9	11	9	10	15	10	17	19
chr1:16954996-16998476	Hsa-Hde	43480	MST1P9	2	2	2	2	2	2	2	2	2	2	2	2	2	6	2	2	2	2	2	2	2	2	2	2	2	2	2	2	2	2	2	2	2	2	2	2	2	2	2	2	2	2	2	6	2	2
chr1:17047976-17154590	Pab-Ppy-Ggod-Ggog-Gbeg-Ptrs-Ptrt-Ptre-Ptrv-Ppa-Hsa-Hde	106614	MIR3675,CROCC	11	12	16	15	11	11	15	12	14	13	12	16	15	14	15	16	14	11	11	15	15	9	16	11	10	13	15	10	11	10	15	12	16	14	13	16	12	14	13	15	16	15	11	12	12	13
chr1:17154590-17172271	Pab-Ppy	17681	CROCC	2	6	2	1	8	4	1	1	1	2	2	2	2	2	2	2	2	9	2	2	2	2	1	8	2	2	2	8	2	6	1	6	2	2	2	1	2	1	2	2	2	2	2	2	2	1
chr1:17605773-17607630	Pab-Ppy-Ggod-Ggog-Gbeg-Ptrs-Ptrt-Ptre-Ptrv-Ppa-Hsa-Hde	1857	RCC2	7	11	9	7	10	11	9	9	8	7	7	9	8	7	9	6	8	9	9	8	8	8	8	11	6	7	8	10	9	8	8	10	8	8	8	8	9	8	8	7	8	10	6	8	8	8
chr1:17688281-17701705	Pab-Ppy-Ggod-Ggog-Gbeg-Ptrs-Ptrt-Ptre-Ptrv-Ppa-Hsa-Hde	13424		5	5	5	4	6	4	4	5	5	5	5	6	6	5	5	7	5	6	5	4	6	6	4	7	6	6	6	6	5	4	4	5	6	5	5	4	6	5	5	5	5	6	6	5	4	5
chr1:19464147-19466333	Ppy	2186	AKR7L	3	3	3	2	4	2	2	3	2	2	2	2	2	2	2	2	2	3	2	2	2	2	2	3	2	2	2	3	3	3	2	2	2	2	2	2	2	2	2	2	2	3	2	2	2	2
chr1:19466333-19471349	Pab-Ppy-Ggod-Ggog-Gbeg-Ptrs-Ptrt-Ptre-Ptrv-Ppa-Hsa-Hde	5016	AKR7L	4	6	5	5	6	5	4	5	5	4	4	4	4	5	5	4	5	4	6	5	5	4	5	5	4	4	5	6	5	5	4	6	4	5	5	3	5	5	4	4	4	5	4	5	5	5
chr1:19481854-19485871	Pab-Ppy-Ggod-Ggog-Gbeg-Ptrs-Ptrt-Ptre-Ptrv-Ppa-Hsa-Hde	4017	AKR7A3	4	4	5	4	4	5	4	4	4	4	3	4	4	5	4	4	4	4	4	4	4	4	5	4	4	4	4	4	5	5	4	5	4	4	4	3	4	4	4	4	4	4	4	5	4	4
chr1:19505069-19508461	Pab-Ppy-Ggod-Ggog-Gbeg-Ptrs-Ptrt-Ptre-Ptrv-Ppa-Hsa-Hde	3392	AKR7A2	4	5	5	4	5	5	4	4	4	4	3	3	4	4	5	4	4	5	5	4	4	4	5	5	4	4	4	5	5	5	3	5	4	4	5	3	4	4	4	4	3	4	3	4	5	5
chr1:19806602-19807549	Pab-Ppy-Ggod-Ggog-Gbeg-Ptrs-Ptrt-Ptre-Ptrv-Ppa-Hsa-Hde	947	MINOS1,C1orf151-NBL1	6	7	6	5	5	7	5	6	6	5	4	5	5	7	6	5	5	7	6	5	5	6	6	5	6	4	5	5	6	6	6	6	5	5	6	6	5	5	5	5	5	6	5	6	5	6
chr1:20351721-20360955	Pab-Ppy-Ggod-Ggog-Gbeg-Ptrs-Ptrt-Ptre-Ptrv-Ppa-Hsa-Hde	9234		17	26	16	17	23	27	20	18	16	19	15	18	18	16	18	15	18	21	16	18	20	20	17	23	17	18	18	26	17	20	17	28	20	18	16	18	16	18	19	18	17	19	17	16	15	16
chr1:20725076-20726548	Pab-Ppy-Ggod-Ggog-Gbeg-Ptrs-Ptrt-Ptre-Ptrv-Ppa-Hsa-Hde	1472		4	6	4	5	5	6	4	4	4	4	3	4	4	4	4	4	5	5	5	4	4	4	4	5	4	3	4	5	4	5	5	6	4	4	4	4	4	4	4	4	4	4	4	5	4	4
chr1:21598280-21630668	Pab-Ppy-Ggod-Ggog-Gbeg-Ptrs-Ptrt-Ptre-Ptrv-Ppa-Hsa-Hde	32388		13	17	22	21	17	16	23	18	20	17	15	19	17	19	19	23	19	19	17	21	18	12	24	17	13	17	21	16	14	17	22	17	20	19	20	22	16	20	18	18	18	20	15	16	20	21
chr1:21639953-21685165	Pab-Ppy-Ggod-Ggog-Gbeg-Ptrs-Ptrt-Ptre-Ptrv-Ppa-Hsa-Hde	45212	NBPF3	14	16	25	25	16	16	26	15	25	14	13	25	24	20	26	29	27	18	14	24	26	14	27	16	15	13	27	16	13	16	27	16	26	25	14	25	15	26	23	23	25	25	14	16	16	15
chr1:22106158-22109091	Pab-Ppy-Ggod-Ggog-Gbeg-Ptrs-Ptrt-Ptre-Ptrv-Ppa-Hsa-Hde	2933	HSPG2	46	53	45	38	51	55	45	52	41	48	42	40	42	42	42	40	42	51	51	45	40	47	43	53	52	47	46	50	54	52	45	53	41	40	49	44	49	41	41	43	42	42	49	44	48	52
chr1:22165535-22209302	Pab-Ppy-Ggod-Ggog-Gbeg-Ptrs-Ptrt-Ptre-Ptrv-Ppa-Hsa-Hde	43767	CELA3B,CELA3A	3	4	4	4	5	4	4	4	4	3	3	4	4	4	5	4	4	6	4	4	4	4	5	4	3	4	4	5	4	5	3	4	4	4	4	4	3	4	4	3	3	4	4	4	4	4
chr1:22277189-22277857	Pab-Ppy-Ggod-Ggog-Gbeg-Ptrs-Ptrt-Ptre-Ptrv-Ppa-Hsa-Hde	668	CDC42	4	4	4	3	4	4	3	5	4	5	5	4	4	6	4	6	4	4	5	4	4	5	4	4	6	5	5	4	5	4	4	4	4	4	4	4	6	4	4	5	4	4	5	6	4	5
chr1:22285357-22286469	Pab-Ppy-Ggod-Ggog-Gbeg-Ptrs-Ptrt-Ptre-Ptrv-Ppa-Hsa-Hde	1112	CDC42	3	3	3	3	4	4	3	4	4	4	3	3	4	5	3	4	4	4	4	4	3	4	4	4	5	5	4	3	4	4	3	4	4	3	4	3	4	3	3	3	3	3	4	4	4	4
chr1:22290162-22291872	Pab-Ppy-Ggod-Ggog-Gbeg-Ptrs-Ptrt-Ptre-Ptrv-Ppa-Hsa-Hde	1710	CDC42	6	5	5	5	6	6	5	6	5	6	5	6	6	7	5	4	6	6	6	5	6	6	5	6	6	6	6	6	7	5	5	5	6	6	6	5	7	5	6	5	5	6	6	7	6	6
chr1:22519852-22523205	Pab-Ppy-Ggod-Ggog-Gbeg-Ptrs-Ptrt-Ptre-Ptrv-Ppa-Hsa-Hde	3353		22	26	24	24	23	26	26	24	23	23	20	22	24	24	24	23	25	25	24	27	23	21	24	23	24	22	25	24	22	24	23	26	24	23	24	26	21	25	22	24	22	23	24	26	24	25
chr1:23283805-23284805	Pab-Ppy	1000	LUZP1	2	4	2	2	4	3	2	2	2	2	2	2	2	2	2	2	2	3	2	2	2	2	2	3	2	2	2	3	2	4	1	3	2	2	2	2	2	2	2	2	2	1	2	3	2	2
chr1:23335499-23359400	Pab-Ppy	23901	LUZP1	2	4	2	2	4	4	2	2	2	2	2	2	2	2	2	2	2	4	2	2	2	2	2	4	2	2	2	4	2	4	2	4	2	2	2	2	2	2	2	2	2	2	2	2	2	2
chr1:23369180-23380223	Pab-Ppy	11043		2	3	2	2	4	3	2	2	2	2	1	2	2	2	2	2	2	4	2	2	2	2	2	4	2	2	2	4	2	3	2	4	2	2	2	2	2	2	2	2	2	2	2	2	2	2
chr1:23443033-23444346	Pab-Ppy-Ggod-Ggog-Gbeg-Ptrs-Ptrt-Ptre-Ptrv-Ppa-Hsa-Hde	1313		5	8	7	8	7	8	8	8	7	6	5	5	6	7	7	7	6	6	7	7	7	5	6	7	6	7	6	6	6	7	7	8	5	6	7	7	6	7	6	6	5	6	7	7	7	7
chr1:24141233-24148292	Pab-Ppy-Ggod-Ggog-Gbeg-Ptrs-Ptrt-Ptre-Ptrv-Ppa-Hsa-Hde	7059		8	5	8	6	5	6	7	7	6	8	7	7	6	7	7	6	7	5	8	6	6	8	6	5	8	7	6	5	9	4	6	5	6	6	7	7	7	7	7	6	6	7	8	7	7	8
chr1:24168277-24170466	Pab-Ppy-Ggod-Ggog-Gbeg-Ptrs-Ptrt-Ptre-Ptrv-Ppa-Hsa-Hde	2189	SRSF10	5	6	6	5	6	6	5	6	5	5	5	6	6	7	5	5	5	6	5	5	5	5	5	6	7	6	7	6	6	6	5	6	6	6	6	5	5	5	6	6	5	6	6	7	6	5
chr1:24871387-24872154	Pab-Ppy-Ggod-Ggog-Gbeg-Ptrs-Ptrt-Ptre-Ptrv-Ppa-Hsa-Hde	767	SRRM1	4	4	5	4	2	3	5	4	4	4	4	4	5	5	4	5	5	3	5	4	5	5	5	3	5	4	5	3	6	2	5	3	4	6	5	5	6	4	5	4	4	6	4	5	4	4
chr1:25042196-25043298	Pab-Ppy-Ggod-Ggog-Gbeg-Ptrs-Ptrt-Ptre-Ptrv-Ppa-Hsa-Hde	1102	CLIC4	4	4	4	4	4	5	4	4	5	4	3	4	5	6	4	4	5	4	4	5	5	5	4	5	4	4	5	4	5	4	5	5	4	4	4	5	4	4	4	4	4	5	4	5	5	5
chr1:25319847-25324365	Pab-Ppy-Ggod-Ggog-Gbeg-Ptrs-Ptrt-Ptre-Ptrv-Ppa-Hsa-Hde	4518		7	9	9	7	9	9	9	8	9	7	6	7	7	7	8	8	7	8	8	8	8	7	8	8	7	7	8	8	9	9	9	9	7	8	8	8	7	9	7	8	7	8	7	8	8	7
chr1:25459107-25492537	Ggod-Ggog-Gbeg-Ptrs-Ptrt-Ptre-Ptrv-Ppa-Hsa-Hde	33430	RHD	4	2	7	3	2	2	3	6	4	6	5	5	4	4	4	4	4	2	6	4	7	7	4	2	5	6	4	2	5	2	3	2	4	6	6	3	4	7	4	4	6	3	6	4	6	6
chr1:25492537-25493636	Pab-Ppy-Ggod-Ggog-Gbeg-Ptrs-Ptrt-Ptre-Ptrv-Ppa-Hsa-Hde	1099	RHD	9	8	16	10	9	9	11	12	11	13	11	12	11	11	11	10	10	7	12	10	12	13	10	9	10	13	10	8	14	8	9	8	10	12	12	12	10	13	10	9	13	10	12	12	13	12
chr1:25493636-25537923	Ggod-Ggog-Gbeg-Ptrs-Ptrt-Ptre-Ptrv-Ppa-Hsa-Hde	44287	RHD,TMEM50A	4	2	7	4	2	2	4	6	4	6	5	6	4	4	4	5	4	2	6	4	7	7	4	2	4	7	4	2	6	2	3	2	4	6	6	4	5	7	4	4	7	4	6	5	6	6
chr1:25561641-25594357	Ggod-Ggog-Gbeg-Ptrs-Ptrt-Ptre-Ptrv-Ppa-Hsa-Hde	32716	RHCE	4	2	7	4	2	2	4	5	4	6	5	5	4	4	4	5	4	2	5	3	6	7	4	2	4	6	4	2	5	2	3	2	4	5	5	4	5	6	4	4	6	4	5	4	5	5
chr1:25594357-25601943	Pab-Ppy-Ggod-Ggog-Gbeg-Ptrs-Ptrt-Ptre-Ptrv-Ppa-Hsa-Hde	7586	RHCE	9	6	14	8	7	7	9	10	9	11	10	11	9	9	9	9	8	5	11	8	11	11	8	6	9	11	10	7	12	6	8	6	9	9	10	10	7	11	8	8	12	9	10	10	11	10
chr1:25601943-25624908	Ggod-Ggog-Gbeg-Ptrs-Ptrt-Ptre-Ptrv-Ppa-Hsa-Hde	22965	RHCE	4	2	7	3	2	2	4	5	3	6	5	5	3	4	3	4	3	2	5	4	6	7	4	2	5	6	4	2	5	2	3	2	3	5	5	4	4	6	3	3	6	3	5	4	5	5
chr1:26086398-26091054	Pab-Ppy-Ggod-Ggog-Gbeg-Ptrs-Ptrt-Ptre-Ptrv-Ppa-Hsa-Hde	4656	STMN1	7	8	7	6	7	7	7	6	6	6	5	7	7	7	6	7	7	7	6	7	6	6	6	8	7	6	6	6	7	7	6	8	6	6	6	7	6	6	7	6	7	6	6	7	6	6
chr1:26325837-26328718	Pab-Ppy-Ggod-Ggog-Gbeg-Ptrs-Ptrt-Ptre-Ptrv-Ppa-Hsa-Hde	2881		9	4	4	3	16	3	2	5	3	7	5	3	3	7	4	5	4	11	4	3	3	8	3	7	6	8	4	12	6	4	3	4	3	3	4	2	8	3	4	4	5	4	21	8	4	5
chr1:26625416-26628514	Pab-Ppy-Ggod-Ggog-Gbeg-Ptrs-Ptrt-Ptre-Ptrv-Ppa-Hsa-Hde	3098	LIN28A	4	7	4	4	6	6	4	6	4	4	4	4	4	4	4	4	4	7	6	4	4	4	5	7	4	4	4	7	4	6	4	7	4	4	6	4	4	4	4	4	4	4	5	4	6	6
chr1:26651562-26655141	Pab-Ppy-Ggod-Ggog-Gbeg-Ptrs-Ptrt-Ptre-Ptrv-Ppa-Hsa-Hde	3579	DHDDS	14	12	16	14	12	13	15	15	15	13	12	15	15	15	14	21	15	14	15	15	13	15	15	12	14	14	15	12	17	12	13	12	15	14	15	16	14	14	15	15	14	14	14	15	15	14
chr1:26673795-26675310	Pab-Ppy-Ggod-Ggog-Gbeg-Ptrs-Ptrt-Ptre-Ptrv-Ppa-Hsa-Hde	1515	HMGN2	27	31	32	28	29	33	29	30	29	29	24	28	29	33	29	27	30	30	30	28	28	28	29	31	29	27	30	29	33	30	29	31	30	29	30	31	30	30	28	28	28	30	29	33	30	31
chr1:26718297-26722006	Pab-Ppy-Ggod-Ggog-Gbeg-Ptrs-Ptrt-Ptre-Ptrv-Ppa-Hsa-Hde	3709		4	4	4	4	4	4	3	4	4	4	3	4	4	4	3	4	3	4	4	3	3	4	4	4	5	3	4	4	5	4	3	4	3	3	4	3	4	4	4	4	4	4	3	4	4	3
chr1:27174634-27185956	Pab-Ppy-Ggod-Ggog-Gbeg-Ptrs-Ptrt-Ptre-Ptrv-Ppa-Hsa-Hde	11322		7	10	8	7	9	10	8	8	7	8	7	7	7	9	8	8	8	9	8	7	7	8	7	9	7	8	8	9	9	9	7	10	7	8	8	7	8	7	7	7	7	8	8	9	8	8
chr1:27363411-27410384	Pab-Ppy-Ggod-Ggog-Gbeg-Ptrs-Ptrt-Ptre-Ptrv-Ppa-Hsa-Hde	46973		4	6	4	4	5	6	3	4	4	4	3	4	4	5	4	4	4	6	4	4	4	4	4	6	4	4	4	6	4	6	3	6	4	4	4	4	3	3	4	4	4	4	4	4	4	4
chr1:27510817-27513500	Pab-Ppy-Ggod-Ggog-Gbeg-Ptrs-Ptrt-Ptre-Ptrv-Ppa-Hsa-Hde	2683		9	13	11	7	14	13	8	9	10	11	9	9	10	10	9	13	10	16	9	9	10	10	9	15	12	10	12	13	10	14	7	13	10	10	9	8	10	10	11	11	10	10	11	11	9	9
chr1:27523537-27527913	Pab-Ppy-Ggod-Ggog-Gbeg-Ptrs-Ptrt-Ptre-Ptrv-Ppa-Hsa-Hde	4376	TMEM222,LOC644961	8	9	7	8	11	8	7	7	7	7	6	7	7	8	8	8	8	8	7	7	7	7	7	8	7	7	7	12	7	15	7	8	7	7	7	7	7	7	8	7	7	7	7	8	7	7
chr1:27848449-27849599	Pab-Ppy-Ggod-Ggog-Gbeg-Ptrs-Ptrt-Ptre-Ptrv-Ppa-Hsa-Hde	1150		4	3	6	5	4	4	6	4	5	4	4	6	5	5	5	6	5	4	4	4	5	4	5	5	5	5	6	4	5	4	6	3	6	4	5	5	5	5	6	5	5	6	5	5	5	4
chr1:28166407-28167520	Pab-Ppy-Ggod-Ggog-Gbeg-Ptrs-Ptrt-Ptre-Ptrv-Ppa-Hsa-Hde	1113	XKR8	4	5	4	3	5	4	4	5	4	4	4	4	4	4	4	4	4	4	4	4	4	4	5	5	4	4	3	4	4	5	5	5	5	4	4	5	4	4	4	4	4	4	4	5	4	4
chr1:28294244-28295474	Pab-Ppy-Ggod-Ggog-Gbeg-Ptrs-Ptrt-Ptre-Ptrv-Ppa-Hsa-Hde	1230		4	6	7	6	6	6	7	4	6	5	4	6	7	7	7	7	7	7	5	7	6	4	6	6	5	4	7	6	7	6	7	7	7	7	4	6	4	6	7	7	6	7	5	7	4	5
chr1:28415655-28418175	Pab-Ppy-Ggod-Ggog-Gbeg-Ptrs-Ptrt-Ptre-Ptrv-Ppa-Hsa-Hde	2520	DNAJC8	5	5	4	3	4	4	4	4	3	5	4	3	3	4	3	3	3	6	5	3	3	5	3	5	5	4	4	5	6	5	3	4	3	3	4	3	4	3	3	3	3	3	5	6	3	5
chr1:28509875-28513226	Pab-Ppy-Ggod-Ggog-Gbeg-Ptrs-Ptrt-Ptre-Ptrv-Ppa-Hsa-Hde	3351		5	6	6	5	6	6	5	5	5	5	5	6	6	6	5	6	6	6	5	6	5	5	5	7	6	5	6	7	6	6	4	6	5	5	5	5	5	5	6	6	6	5	5	6	4	5
chr1:28724965-28726236	Pab-Ppy-Ggod-Ggog-Gbeg-Ptrs-Ptrt-Ptre-Ptrv-Ppa-Hsa-Hde	1271	RCC1	4	5	4	4	4	4	4	5	4	4	4	3	4	5	4	4	4	4	5	4	3	4	4	4	4	4	4	3	5	4	3	4	4	4	5	4	4	4	4	4	3	4	4	5	5	5
chr1:28941726-28942948	Pab-Ppy-Ggod-Ggog-Gbeg-Ptrs-Ptrt-Ptre-Ptrv-Ppa-Hsa-Hde	1222	YTHDF2	4	5	4	4	4	5	4	4	4	4	4	4	4	4	4	5	4	5	4	5	4	4	4	5	4	4	5	5	4	5	4	5	4	4	4	4	4	4	3	4	4	4	4	4	5	4
chr1:29177274-29182293	Pab-Ppy-Ggod-Ggog-Gbeg-Ptrs-Ptrt-Ptre-Ptrv-Ppa-Hsa-Hde	5019	EPB41	4	5	4	4	4	5	4	4	4	4	3	4	4	4	4	4	4	5	4	4	4	4	4	4	4	4	4	3	4	5	3	5	4	4	4	4	3	4	4	4	4	4	4	4	4	4
chr1:29925755-29927903	Pab-Ppy-Ggod-Ggog-Gbeg-Ptrs-Ptrt-Ptre-Ptrv-Ppa-Hsa-Hde	2148		3	4	4	4	3	4	3	4	3	3	3	4	3	4	3	4	4	3	3	4	3	4	3	4	4	4	4	4	4	3	4	4	4	3	4	3	4	4	4	4	4	4	3	4	4	4
chr1:30003917-30004524	Pab-Ppy-Ggod-Ggog-Gbeg-Ptrs-Ptrt-Ptre-Ptrv-Ppa-Hsa-Hde	607		4	5	4	4	5	5	4	4	4	3	2	4	4	4	5	4	4	4	4	4	4	4	4	4	3	4	4	5	4	5	4	5	3	3	4	4	4	4	4	3	4	4	3	3	4	4
chr1:30603994-30606050	Pab-Ppy-Ggod-Ggog-Gbeg-Ptrs-Ptrt-Ptre-Ptrv-Ppa-Hsa-Hde	2056		4	7	5	5	4	6	4	5	5	4	3	4	4	4	5	4	4	6	5	4	5	4	5	5	3	4	4	6	4	6	5	6	4	3	5	3	5	4	4	3	4	4	4	4	5	5
chr1:31180800-31181883	Pab-Ppy-Ggod-Ggog-Gbeg-Ptrs-Ptrt-Ptre-Ptrv-Ppa-Hsa-Hde	1083	PUM1,SNORD103B,SNORD103A	4	6	4	5	4	6	4	5	4	4	3	3	4	5	4	4	4	5	5	5	4	4	5	5	4	4	3	4	4	6	5	5	4	4	5	5	4	5	4	4	4	4	4	4	4	5
chr1:31194611-31195407	Pab-Ppy-Ggod-Ggog-Gbeg-Ptrs-Ptrt-Ptre-Ptrv-Ppa-Hsa-Hde	796	PUM1,SNORD103B,SNORD103A	3	5	4	4	4	5	4	4	4	4	3	3	4	4	4	3	4	4	4	4	4	3	4	4	3	4	3	3	4	5	4	5	3	4	4	4	4	4	4	3	4	4	3	4	4	5
chr1:31348349-31358328	Pab-Ppy-Ggod-Ggog-Gbeg-Ptrs-Ptrt-Ptre-Ptrv-Ppa-Hsa-Hde	9979		18	20	17	13	18	20	16	20	16	19	17	16	16	17	15	18	16	19	19	15	15	18	16	21	20	19	19	19	22	20	16	20	15	15	19	15	22	16	16	17	16	16	20	17	19	20
chr1:31425155-31427504	Gbeg	2349	NKAIN1	2	2	2	3	3	2	2	2	2	2	2	2	2	2	2	2	3	2	2	3	3	2	3	3	2	2	2	3	2	2	2	2	2	2	2	2	2	2	2	2	2	2	2	3	2	2
chr1:31731578-31733769	Pab-Ppy-Ggod-Ggog-Gbeg-Ptrs-Ptrt-Ptre-Ptrv-Ppa-Hsa-Hde	2191		9	12	9	10	11	11	11	11	10	9	8	10	10	11	10	10	11	10	11	11	10	9	10	11	10	9	10	10	12	12	10	12	10	10	12	11	10	11	10	9	9	10	10	12	10	10
chr1:32157143-32157740	Pab-Ppy-Ggod-Ggog-Gbeg-Ptrs-Ptrt-Ptre-Ptrv-Ppa-Hsa-Hde	597	PTP4A2	4	5	6	4	5	5	4	5	5	5	4	4	5	6	4	7	5	5	4	4	5	5	4	6	6	5	5	5	6	5	4	5	6	5	5	4	6	5	5	5	5	6	5	5	4	5
chr1:32639136-32640938	Pab-Ppy-Ggod-Ggog-Gbeg-Ptrs-Ptrt-Ptre-Ptrv-Ppa-Hsa-Hde	1802		5	6	5	6	5	6	6	5	5	4	4	5	5	5	5	5	5	5	6	6	5	5	6	5	5	5	5	5	5	6	6	6	5	5	6	6	5	6	5	5	5	5	5	5	6	5
chr1:32650179-32668683	Pab-Ppy-Ggod-Ggog-Gbeg-Ptrs-Ptrt-Ptre-Ptrv-Ppa-Hsa-Hde	18504		4	5	5	4	5	4	5	4	4	4	4	4	4	4	4	5	5	4	4	4	4	4	4	5	4	4	4	4	4	4	4	4	4	4	4	5	4	4	4	4	4	4	4	4	4	4
chr1:32904444-32907683	Pab-Ppy-Ggod-Ggog-Gbeg-Ptrs-Ptrt-Ptre-Ptrv-Ppa-Hsa-Hde	3239	RBBP4	4	4	4	4	4	4	4	4	4	4	4	4	4	4	4	7	4	4	5	4	4	5	4	4	5	4	6	4	5	4	3	4	4	4	5	4	6	4	4	5	4	4	5	4	5	4
chr1:32917892-32918695	Pab-Ppy-Ggod-Ggog-Gbeg-Ptrs-Ptrt-Ptre-Ptrv-Ppa-Hsa-Hde	803	RBBP4,SYNC	8	9	9	6	6	8	8	9	9	8	7	8	8	8	8	8	8	7	8	8	8	9	9	6	7	8	9	7	9	7	8	8	8	8	9	8	7	9	8	7	7	7	9	9	8	8
chr1:33248173-33249106	Pab-Ppy-Ggod-Ggog-Gbeg-Ptrs-Ptrt-Ptre-Ptrv-Ppa-Hsa-Hde	933	AK2	3	4	6	5	4	3	6	4	5	4	3	5	6	6	5	4	5	3	3	6	6	3	5	4	4	3	6	3	5	3	5	3	5	5	4	5	4	6	5	5	5	6	3	6	4	3
chr1:33739345-33740391	Ggod-Ggog-Gbeg-Ptrs-Ptrt-Ptre-Ptrv-Ppa-Hsa-Hde	1046		9	2	28	17	2	3	21	8	25	5	5	43	41	15	21	35	43	3	6	19	44	7	30	2	6	9	38	2	7	2	18	3	48	43	7	23	5	27	43	31	41	41	7	12	8	6
chr1:35033316-35033997	Pab-Ppy-Ggod-Ggog-Gbeg-Ptrs-Ptrt-Ptre-Ptrv-Ppa-Hsa-Hde	681	GJA4	3	4	3	5	3	4	5	3	4	4	3	4	3	3	4	3	3	3	4	4	3	4	4	4	4	4	3	4	3	4	4	5	3	3	4	4	3	4	3	3	3	4	3	4	4	4
chr1:35360117-35361119	Pab-Ppy-Ggod-Ggog-Gbeg-Ptrs-Ptrt-Ptre-Ptrv-Ppa-Hsa-Hde	1002		3	5	5	5	4	5	5	4	5	4	3	3	4	4	5	3	4	4	4	5	4	3	4	4	3	4	4	5	4	4	4	4	3	4	4	5	3	5	4	4	3	3	4	4	4	4
chr1:35588913-35591978	Pab-Ppy-Ggod-Ggog-Gbeg-Ptrs-Ptrt-Ptre-Ptrv-Ppa-Hsa-Hde	3065	ZMYM4	14	16	14	14	15	17	14	15	14	14	12	13	13	16	14	15	13	16	16	14	14	14	15	16	15	15	15	17	17	17	14	17	14	14	16	16	14	14	14	14	14	13	16	17	16	16
chr1:35658941-35660085	Pab-Ppy-Ggod-Ggog-Gbeg-Ptrs-Ptrt-Ptre-Ptrv-Ppa-Hsa-Hde	1144	ZMYM4	3	4	4	3	4	4	4	3	4	4	3	4	4	4	4	4	4	4	4	4	4	3	4	4	4	4	4	4	4	4	4	3	4	4	3	4	3	3	3	5	4	4	4	5	3	4
chr1:36524608-36525608	Pab-Ppy-Ggod-Ggog-Gbeg-Ptrs-Ptrt-Ptre-Ptrv-Ppa-Hsa-Hde	1000	THRAP3	3	5	4	4	4	5	3	4	4	3	3	3	3	4	4	3	4	4	4	5	4	3	4	4	3	4	4	4	4	4	4	4	4	4	4	4	3	3	3	4	3	3	3	4	4	4
chr1:36542360-36543329	Pab-Ppy-Ggod-Ggog-Gbeg-Ptrs-Ptrt-Ptre-Ptrv-Ppa-Hsa-Hde	969	THRAP3	4	4	4	4	5	3	4	3	3	3	3	4	4	4	3	3	3	4	3	3	4	3	3	5	3	4	3	4	4	3	4	3	4	4	3	4	4	3	4	3	4	3	4	4	3	3
chr1:37783203-37795306	Pab-Ppy-Ggod-Ggog-Gbeg-Ptrs-Ptrt-Ptre-Ptrv-Ppa-Hsa-Hde	12103	SNIP1,DNALI1	5	6	6	5	5	6	6	6	5	5	5	5	6	5	5	5	6	6	6	6	5	5	5	6	6	6	6	6	7	6	6	6	6	6	6	6	5	5	5	6	5	6	5	6	6	6
chr1:38079092-38082368	Pab-Ppy-Ggod-Ggog-Gbeg-Ptrs-Ptrt-Ptre-Ptrv-Ppa-Hsa-Hde	3276	MTF1	5	5	5	5	5	6	4	4	4	4	4	5	5	5	4	4	4	6	4	4	5	4	4	5	4	4	5	6	4	5	4	5	5	5	4	4	4	4	4	4	5	5	4	5	4	4
chr1:38195551-38196549	Pab-Ppy-Ggod-Ggog-Gbeg-Ptrs-Ptrt-Ptre-Ptrv-Ppa-Hsa-Hde	998	SF3A3	3	4	4	4	4	4	4	4	3	4	3	4	4	4	3	4	4	5	4	3	4	3	4	4	4	4	4	4	3	4	3	4	4	3	4	4	4	4	3	3	4	4	4	4	4	4
chr1:38947810-38950643	Pab-Ppy-Ggod-Ggog-Gbeg-Ptrs-Ptrt-Ptre-Ptrv-Ppa-Hsa-Hde	2833		4	4	4	4	4	5	4	4	4	4	3	4	4	4	4	4	4	4	4	4	4	4	4	4	4	4	5	4	4	4	4	5	4	4	4	5	5	4	4	4	3	4	4	4	4	4
chr1:39242371-39244152	Pab-Ppy-Ggod-Ggog-Gbeg-Ptrs-Ptrt-Ptre-Ptrv-Ppa-Hsa-Hde	1781	AKIRIN1	5	4	5	4	4	5	4	7	4	6	6	4	4	4	4	3	4	4	6	4	4	7	3	5	5	6	4	4	8	4	3	4	4	4	6	4	7	4	4	4	3	4	6	4	6	6
chr1:39251759-39253951	Pab-Ppy-Ggod-Ggog-Gbeg-Ptrs-Ptrt-Ptre-Ptrv-Ppa-Hsa-Hde	2192		29	22	24	20	62	23	22	20	22	23	21	28	26	25	23	20	24	67	20	21	26	25	21	67	21	25	22	61	25	25	22	22	27	26	21	21	22	21	26	20	26	25	25	26	19	21
chr1:39380163-39381914	Pab-Ppy	1751	MACF1	2	4	2	2	4	4	2	2	2	2	2	2	2	2	2	2	2	4	2	2	2	2	2	4	2	2	2	4	2	4	2	4	2	2	2	2	2	2	2	2	2	2	2	2	2	2
chr1:39541396-39547789	Pab-Ppy-Ggod-Ggog-Gbeg-Ptrs-Ptrt-Ptre-Ptrv-Ppa-Hsa-Hde	6393	MACF1	3	4	4	4	5	5	3	3	4	4	3	3	3	4	3	2	3	4	4	3	3	4	4	4	3	3	4	5	4	5	3	4	4	3	4	4	3	4	3	3	3	4	3	4	3	4
chr1:39754959-39757925	Ptrs-Ptrt-Ptre-Ptrv-Ppa-Hsa-Hde	2966	BMP8A	4	2	2	3	3	2	3	4	2	4	3	2	2	5	2	2	2	2	5	2	2	5	2	2	5	4	2	2	5	3	3	2	2	2	4	3	5	2	2	2	2	2	4	6	5	5
chr1:39956426-39958551	Pab-Ppy-Ggod-Ggog-Gbeg-Ptrs-Ptrt-Ptre-Ptrv-Ppa-Hsa-Hde	2125		3	4	4	4	4	5	3	4	4	4	3	3	4	4	4	4	4	5	4	3	4	4	4	4	4	4	4	4	4	4	4	4	4	3	4	3	4	4	4	4	3	4	4	5	3	4
chr1:40001730-40004423	Pab-Ppy-Ggod-Ggog-Gbeg-Ptrs-Ptrt-Ptre-Ptrv-Ppa-Hsa-Hde	2693	PPIE,BMP8B	3	4	4	4	4	4	3	4	4	4	3	4	4	5	4	4	4	4	3	3	4	3	3	4	4	4	4	4	4	4	3	4	4	4	3	3	4	4	4	3	4	4	4	4	3	3
chr1:40004423-40006018	ils_clades_HUMAN-CHIMP-BONOBO-ORANGUTAN	1595	BMP8B	5	4	1	1	4	5	1	5	1	5	4	1	1	5	1	1	1	4	6	1	1	4	1	4	4	4	1	4	4	5	1	5	1	1	5	1	4	1	1	1	1	1	4	6	5	5
chr1:40006018-40014294	Ptrs-Ptrt-Ptre-Ptrv-Ppa-Hsa-Hde	8276	BMP8B,OXCT2	4	2	2	2	3	2	2	4	2	4	3	2	2	5	2	2	2	2	5	2	2	5	2	2	5	4	2	2	4	3	3	2	2	2	4	3	5	2	2	2	2	2	4	6	4	5
chr1:40199095-40203922	Pab-Ppy-Ggod-Ggog-Gbeg-Ptrs-Ptrt-Ptre-Ptrv-Ppa-Hsa-Hde	4827	MFSD2A	24	22	19	22	28	20	15	19	18	25	21	24	22	23	18	26	24	29	19	16	24	25	19	28	27	25	26	30	21	24	14	22	22	24	19	14	24	18	23	26	24	23	24	25	17	18
chr1:40309668-40310856	Pab-Ppy-Ggod-Ggog-Gbeg-Ptrs-Ptrt-Ptre-Ptrv-Ppa-Hsa-Hde	1188	CAP1	7	10	7	7	9	10	9	7	7	7	6	6	6	7	6	7	6	10	6	6	9	7	6	10	6	7	7	10	6	10	6	9	8	8	7	7	7	7	6	6	6	6	7	7	7	7
chr1:40365789-40370713	Pab-Ppy-Ggod-Ggog-Gbeg-Ptrs-Ptrt-Ptre-Ptrv-Ppa-Hsa-Hde	4924		4	5	5	4	5	5	5	4	4	4	3	4	4	5	4	5	3	5	4	4	4	4	4	5	5	4	4	5	5	5	5	5	5	4	4	4	4	4	4	4	4	4	4	4	4	4
chr1:40561910-40574283	Pab-Ppy-Ggod-Ggog-Gbeg-Ptrs-Ptrt-Ptre-Ptrv-Ppa-Hsa-Hde	12373		46	51	44	38	50	51	43	51	41	49	42	41	43	43	41	48	42	52	50	42	42	47	42	53	54	48	48	50	55	50	43	51	41	41	48	42	55	42	41	45	42	42	52	46	48	52
chr1:41178456-41181440	Pab-Ppy-Ggod-Ggog-Gbeg-Ptrs-Ptrt-Ptre-Ptrv-Ppa-Hsa-Hde	2984		3	4	4	3	4	4	3	3	3	3	3	4	4	4	3	4	4	4	4	3	3	3	4	4	3	3	3	3	3	4	3	4	4	3	3	3	4	3	4	3	4	4	4	4	4	4
chr1:41336460-41337584	Pab-Ppy-Ggod-Ggog-Gbeg-Ptrs-Ptrt-Ptre-Ptrv-Ppa-Hsa-Hde	1124	SCMH1,MIR5095	5	5	4	4	5	6	4	4	4	4	3	4	4	5	4	4	3	4	4	4	4	4	3	6	5	5	4	5	4	5	4	5	4	4	5	5	5	4	4	4	4	4	4	5	4	4
chr1:42650552-42652812	Pab-Ppy-Ggod-Ggog-Gbeg-Ptrs-Ptrt-Ptre-Ptrv-Ppa-Hsa-Hde	2260	RIMKLA	7	8	6	5	7	7	6	6	5	7	5	5	6	6	5	6	5	8	6	6	6	6	6	7	7	6	6	6	6	7	6	7	5	5	6	6	6	6	6	5	5	5	5	6	6	7
chr1:42727873-42730714	Pab-Ppy-Ggod-Ggog-Gbeg-Ptrs-Ptrt-Ptre-Ptrv-Ppa-Hsa-Hde	2841		9	8	9	8	7	8	9	12	8	10	9	8	9	10	8	13	8	8	12	9	9	10	9	8	10	10	10	6	10	7	8	7	8	9	11	9	11	9	9	9	9	9	11	11	11	11
chr1:42737229-42765441	Pab-Ppy-Ggod-Ggog-Gbeg-Ptrs-Ptrt-Ptre-Ptrv-Ppa-Hsa-Hde	28212		5	4	5	4	4	5	5	4	4	5	4	5	5	5	5	4	4	5	5	5	4	4	4	5	5	4	5	4	5	4	4	5	5	5	4	5	5	5	5	4	5	4	4	5	4	5
chr1:42934658-42935287	Pab-Ppy-Ggod-Ggog-Gbeg-Ptrs-Ptrt-Ptre-Ptrv-Ppa-Hsa-Hde	629	YBX1	7	6	5	5	9	5	4	4	4	9	8	5	6	7	5	8	6	8	4	4	6	9	4	8	10	9	8	8	6	6	4	5	5	5	5	4	7	5	6	8	6	6	6	7	4	5
chr1:42939102-42941145	Pab-Ppy-Ggod-Ggog-Gbeg-Ptrs-Ptrt-Ptre-Ptrv-Ppa-Hsa-Hde	2043	YBX1	6	6	5	4	6	6	4	4	4	6	5	4	4	4	5	5	4	6	4	5	5	6	4	6	6	6	4	6	6	6	4	6	4	4	4	5	5	4	5	4	4	5	4	4	4	5
chr1:43126826-43130529	Pab-Ppy-Ggod-Ggog-Gbeg-Ptrs-Ptrt-Ptre-Ptrv-Ppa-Hsa-Hde	3703		4	6	6	5	5	6	6	6	5	4	4	6	6	3	5	5	6	7	5	6	6	5	5	6	5	5	6	6	6	5	6	6	6	6	5	6	5	6	5	5	5	5	5	5	5	5
chr1:43981713-43982302	Pab-Ppy-Ggod-Ggog-Gbeg-Ptrs-Ptrt-Ptre-Ptrv-Ppa-Hsa-Hde	589	ST3GAL3	4	6	5	3	5	6	4	4	4	4	3	4	4	5	4	3	5	6	5	4	4	4	4	5	4	4	5	5	4	5	4	5	4	4	4	4	3	4	4	4	4	4	4	5	4	4
chr1:44331593-44344814	Pab-Ppy-Ggod-Ggog-Gbeg-Ptrs-Ptrt-Ptre-Ptrv-Ppa-Hsa-Hde	13221		11	14	10	10	13	12	7	11	11	11	10	12	12	11	11	12	12	13	11	7	13	10	11	13	11	11	11	13	13	17	7	15	12	13	12	6	10	13	11	11	11	12	11	11	11	10
chr1:45016427-45021102	Pab-Ppy-Ggod-Ggog-Gbeg-Ptrs-Ptrt-Ptre-Ptrv-Ppa-Hsa-Hde	4675	RPS8,SNORD38B	4	4	4	4	4	4	4	3	3	4	3	4	3	4	4	3	4	4	3	3	4	4	3	4	4	4	5	3	4	4	4	4	3	4	3	4	4	4	4	4	4	5	3	3	4	4
chr1:45081471-45083021	Pab-Ppy-Ggod-Ggog-Gbeg-Ptrs-Ptrt-Ptre-Ptrv-Ppa-Hsa-Hde	1550		15	13	13	13	16	14	10	12	12	13	12	14	14	13	13	15	15	16	11	13	14	13	13	15	13	15	15	14	14	13	12	13	14	15	11	13	14	12	15	13	14	14	14	13	11	12
chr1:45224826-45228320	Pab-Ppy-Ggod-Ggog-Gbeg-Ptrs-Ptrt-Ptre-Ptrv-Ppa-Hsa-Hde	3494	EIF2B3	23	26	25	26	22	26	27	24	24	23	19	23	24	25	25	21	24	25	25	28	23	21	25	23	24	21	26	22	24	24	26	26	24	23	24	27	21	26	23	25	23	25	24	27	25	25
chr1:45254693-45258271	Pab-Ppy-Ggod-Ggog-Gbeg-Ptrs-Ptrt-Ptre-Ptrv-Ppa-Hsa-Hde	3578	ZSWIM5	5	11	4	5	11	11	5	5	4	5	4	5	4	4	4	5	4	10	6	5	4	5	5	12	6	5	4	12	7	12	4	12	4	4	6	4	5	5	4	4	4	4	5	4	6	5
chr1:45306236-45319141	Pab-Ppy-Ggod-Ggog-Gbeg-Ptrs-Ptrt-Ptre-Ptrv-Ppa-Hsa-Hde	12905	ZSWIM5	5	6	6	5	5	6	6	7	5	6	6	5	5	6	5	5	5	5	6	5	5	7	5	6	6	6	6	5	7	5	5	6	5	5	6	5	6	5	5	5	5	5	7	7	6	7
chr1:45415201-45433329	Pab-Ppy-Ggod-Ggog-Gbeg-Ptrs-Ptrt-Ptre-Ptrv-Ppa-Hsa-Hde	18128	ZSWIM5	4	8	4	3	6	5	4	4	3	4	4	3	3	3	3	2	4	8	5	3	3	4	3	6	6	4	2	5	5	7	4	6	3	3	5	4	6	4	3	3	3	3	6	3	4	5
chr1:45652120-45656653	Pab-Ppy-Ggod-Ggog-Gbeg-Ptrs-Ptrt-Ptre-Ptrv-Ppa-Hsa-Hde	4533	TESK2	18	20	20	20	20	21	21	19	19	19	16	19	20	21	19	19	20	21	20	21	19	17	19	20	19	18	21	19	19	20	20	20	19	19	20	20	17	20	18	20	18	20	20	22	19	18
chr1:45845738-45846470	Pab-Ppy-Ggod-Ggog-Gbeg-Ptrs-Ptrt-Ptre-Ptrv-Ppa-Hsa-Hde	732	NASP	4	5	3	3	4	5	4	4	4	3	3	4	3	4	4	6	3	5	4	4	4	4	4	5	4	4	3	4	4	5	3	4	4	4	4	4	3	4	4	3	4	4	4	3	4	3
chr1:45889101-45890722	Pab-Ppy-Ggod-Ggog-Gbeg-Ptrs-Ptrt-Ptre-Ptrv-Ppa-Hsa-Hde	1621	GPBP1L1	9	11	9	10	10	11	11	10	10	9	8	10	9	10	10	10	10	11	11	9	10	9	11	10	10	9	10	9	9	11	10	11	9	9	10	10	10	10	10	9	10	9	10	11	10	10
chr1:45931360-45932902	Pab-Ppy-Ggod-Ggog-Gbeg-Ptrs-Ptrt-Ptre-Ptrv-Ppa-Hsa-Hde	1542	TMEM69,IPP	4	4	4	3	4	4	3	4	3	4	3	4	4	4	3	4	4	4	4	3	4	4	3	4	4	3	4	4	4	4	3	4	4	3	4	4	4	3	4	4	4	4	4	4	3	3
chr1:46019389-46021056	Pab-Ppy-Ggod-Ggog-Gbeg-Ptrs-Ptrt-Ptre-Ptrv-Ppa-Hsa-Hde	1667		16	15	14	13	13	16	15	23	13	16	14	14	14	14	14	15	14	14	23	16	14	16	14	13	17	14	14	15	17	14	14	16	15	14	21	15	16	14	14	13	13	13	21	14	21	24
chr1:46073162-46074779	Pab-Ppy-Ggod-Ggog-Gbeg-Ptrs-Ptrt-Ptre-Ptrv-Ppa-Hsa-Hde	1617	MAST2	5	6	6	5	5	6	6	5	5	5	5	6	6	7	6	6	6	6	5	6	6	6	5	6	5	6	6	6	5	7	5	6	6	5	5	5	5	5	5	5	5	6	5	7	5	6
chr1:46873314-46877061	Ppa	3747	ATPAF1	2	2	2	2	2	2	2	4	2	2	2	2	2	2	2	2	2	2	4	2	2	2	2	2	2	2	2	2	2	2	2	2	2	2	3	2	2	2	2	2	2	2	3	3	4	4
chr1:47082123-47090969	Pab-Ppy-Ggod-Ggog-Gbeg-Ptrs-Ptrt-Ptre-Ptrv-Ppa-Hsa-Hde	8846	CYP4Z2P	3	4	3	3	3	4	4	4	4	4	3	4	4	5	4	4	4	4	4	4	4	4	4	4	4	4	4	3	4	4	4	4	3	4	4	4	4	4	4	4	3	4	4	4	4	4
chr1:47106140-47130194	ils_clades_HUMAN-CHIMP-BONOBO-ORANGUTAN	24054	CYP4Z2P	4	4	2	2	3	4	2	5	2	4	3	2	2	5	2	2	2	4	4	2	2	4	2	4	4	4	2	4	4	4	2	4	2	2	5	2	4	2	2	2	2	2	4	5	4	4
chr1:47165324-47187199	Pab-Ppy-Ggod-Ggog-Gbeg-Ptrs-Ptrt-Ptre-Ptrv-Ppa-Hsa-Hde	21875	CYP4A11	4	4	4	4	4	4	4	4	4	4	3	4	4	4	4	4	4	4	4	4	4	4	4	4	4	4	4	4	4	4	4	5	4	4	4	4	4	5	4	4	4	4	4	4	5	4
chr1:47308240-47337937	ils_clades_HUMAN-CHIMP-BONOBO-ORANGUTAN	29697	CYP4Z1	4	4	2	2	3	4	2	4	2	4	3	2	2	4	2	2	2	4	4	2	2	4	2	4	4	4	2	3	4	4	2	4	2	2	4	2	4	2	2	2	2	2	4	5	4	4
chr1:47351337-47390081	Pab-Ppy-Ggod-Ggog-Gbeg-Ptrs-Ptrt-Ptre-Ptrv-Ppa-Hsa-Hde	38744	CYP4Z1,CYP4A22	4	4	4	4	4	4	4	4	4	4	3	4	4	4	4	4	4	4	4	4	4	4	4	4	4	4	4	4	4	4	4	5	4	4	4	4	4	4	4	4	4	4	4	4	4	4
chr1:47734258-47738990	Pab-Ppy-Ggod-Ggog-Gbeg-Ptrs-Ptrt-Ptre-Ptrv-Ppa-Hsa-Hde	4732		12	12	12	10	11	13	11	13	11	13	11	10	12	11	11	13	11	12	13	11	11	12	11	14	14	12	13	12	14	13	12	12	12	11	13	11	17	11	10	11	10	11	13	12	12	13
chr1:48674467-48675570	Pab-Ppy-Ggod-Ggog-Gbeg-Ptrs-Ptrt-Ptre-Ptrv-Ppa-Hsa-Hde	1103	SPATA6	6	4	4	3	4	4	3	6	3	5	4	4	3	5	4	4	3	4	6	3	3	5	3	3	6	5	3	4	6	4	4	4	3	3	6	4	5	3	3	3	3	3	5	6	6	6
chr1:48733697-48737835	Pab-Ppy-Ggod-Ggog-Gbeg-Ptrs-Ptrt-Ptre-Ptrv-Ppa-Hsa-Hde	4138		5	6	6	5	6	6	5	6	5	6	5	5	5	5	5	6	5	6	6	6	5	6	5	6	6	6	5	6	6	6	6	6	5	5	6	5	6	5	5	5	5	5	6	5	6	6
chr1:48777652-48782427	Gbeg	4775	AGBL4	2	2	2	2	2	2	3	2	2	2	2	2	2	2	2	2	2	2	2	3	2	2	3	2	2	2	2	2	2	2	3	2	2	2	3	2	2	2	2	2	3	2	2	2	3	2
chr1:50251558-50256770	Pab-Ppy-Ggod-Ggog-Gbeg-Ptrs-Ptrt-Ptre-Ptrv-Ppa-Hsa-Hde	5212	AGBL4	3	3	4	4	6	3	4	3	4	4	4	4	4	17	4	3	5	8	3	4	7	4	4	10	5	4	11	4	4	4	4	4	4	6	4	4	4	5	4	6	4	18	4	10	4	4
chr1:50562035-50566752	Pab-Ppy-Ggod-Ggog-Gbeg-Ptrs-Ptrt-Ptre-Ptrv-Ppa-Hsa-Hde	4717		24	23	20	22	26	23	18	21	19	23	20	22	21	22	19	24	22	26	20	19	22	23	20	27	25	24	23	26	23	24	17	24	21	22	20	15	23	19	22	23	22	21	23	24	18	20
chr1:50637272-50650864	Pab-Ppy-Ggod-Ggog-Gbeg-Ptrs-Ptrt-Ptre-Ptrv-Ppa-Hsa-Hde	13592		5	6	6	5	6	6	6	6	5	5	5	5	6	5	5	5	6	6	6	5	5	6	5	6	5	6	5	6	5	6	6	6	5	5	6	5	5	5	5	5	5	5	6	6	6	6
chr1:50822225-50822725	Pab-Ppy	500	FAF1	2	4	1	2	4	4	2	2	2	2	2	2	2	2	2	2	3	4	2	2	2	2	2	4	2	2	2	4	2	4	2	3	2	2	2	2	1	2	2	2	2	2	3	2	2	2
chr1:51395912-51396505	Pab-Ppy-Ggod-Ggog-Gbeg-Ptrs-Ptrt-Ptre-Ptrv-Ppa-Hsa-Hde	593		5	6	7	6	6	7	6	6	5	6	4	6	5	5	6	5	5	6	5	6	5	5	6	6	5	5	6	7	6	6	5	6	5	6	6	5	5	5	6	5	5	6	5	7	5	6
chr1:51488859-51492478	Pab-Ppy-Ggod-Ggog-Gbeg-Ptrs-Ptrt-Ptre-Ptrv-Ppa-Hsa-Hde	3619	RNF11	24	22	20	23	28	20	15	20	19	26	22	25	23	24	18	26	25	29	19	16	24	25	20	29	27	25	28	30	22	25	15	23	24	25	19	14	25	19	25	27	25	25	25	26	18	19
chr1:51938372-51947533	Pab-Ppy-Ggod-Ggog-Gbeg-Ptrs-Ptrt-Ptre-Ptrv-Ppa-Hsa-Hde	9161	OSBPL9	3	4	4	3	4	4	4	4	3	3	3	4	4	4	4	4	4	4	4	4	4	3	3	4	3	3	4	3	3	4	4	5	4	4	4	5	4	4	3	4	3	4	4	5	4	3
chr1:52217208-52223546	Pab-Ppy-Ggod-Ggog-Gbeg-Ptrs-Ptrt-Ptre-Ptrv-Ppa-Hsa-Hde	6338	RAB3B	10	10	12	10	10	11	11	11	10	11	10	10	11	12	10	11	10	11	10	11	10	11	10	11	12	12	11	11	13	10	10	10	11	11	11	10	11	10	10	11	11	10	10	12	10	11
chr1:52321344-52321844	Pab-Ppy-Ggod-Ggog-Gbeg-Ptrs-Ptrt-Ptre-Ptrv-Ppa-Hsa-Hde	500	BTF3L4	4	3	5	4	2	4	4	4	4	4	3	4	4	5	4	5	5	4	4	4	4	4	4	4	5	5	5	3	4	3	4	3	4	4	4	4	5	4	4	5	3	5	5	5	4	4
chr1:52325473-52326567	Pab-Ppy-Ggod-Ggog-Gbeg-Ptrs-Ptrt-Ptre-Ptrv-Ppa-Hsa-Hde	1094	BTF3L4	4	4	4	4	4	5	4	4	4	4	3	4	4	4	4	4	4	4	4	4	4	4	4	4	4	4	4	4	4	4	4	4	4	4	4	4	4	4	4	3	4	3	4	4	4	4
chr1:52390672-52399411	Pab-Ppy-Ggod-Ggog-Gbeg-Ptrs-Ptrt-Ptre-Ptrv-Ppa-Hsa-Hde	8739	ZFYVE9	6	6	7	8	6	6	8	8	7	8	5	7	7	5	7	7	7	5	9	8	7	6	7	5	6	6	8	5	7	6	7	6	7	8	8	8	7	7	7	8	7	8	8	6	7	7
chr1:52408188-52421137	Pab-Ppy-Ggod-Ggog-Gbeg-Ptrs-Ptrt-Ptre-Ptrv-Ppa-Hsa-Hde	12949	ZFYVE9	5	5	6	6	5	6	6	6	6	6	5	6	5	6	6	6	6	5	6	6	6	5	6	6	6	6	6	5	6	5	5	5	5	6	6	7	6	6	6	5	6	5	6	6	5	6
chr1:53010504-53013137	Pab-Ppy-Ggod-Ggog-Gbeg-Ptrs-Ptrt-Ptre-Ptrv-Ppa-Hsa-Hde	2633	ZYG11B	5	4	6	5	4	4	6	5	5	6	5	5	5	5	5	5	5	3	7	5	5	6	5	3	6	6	6	4	6	4	5	4	5	5	5	5	5	5	6	5	4	6	6	6	6	6
chr1:53059963-53066028	Ppa	6065	ZYG11B	2	2	2	2	2	2	2	4	2	2	2	2	2	2	2	2	2	2	4	2	2	2	2	2	2	2	2	2	2	2	1	2	2	2	4	2	2	2	2	2	2	2	4	2	3	3
chr1:53158019-53159023	Pab-Ppy-Ggod-Ggog-Gbeg-Ptrs-Ptrt-Ptre-Ptrv-Ppa-Hsa-Hde	1004	ECHDC2	5	5	6	6	5	5	7	5	6	4	4	6	6	5	6	5	5	4	5	5	6	5	6	6	5	5	6	5	6	5	6	4	6	6	5	6	5	5	6	5	6	6	4	6	4	5
chr1:53180687-53182176	Pab-Ppy-Ggod-Ggog-Gbeg-Ptrs-Ptrt-Ptre-Ptrv-Ppa-Hsa-Hde	1489	SCP2	3	3	4	4	3	4	4	4	3	4	3	4	4	4	4	3	4	3	4	4	4	4	3	4	4	3	4	4	5	3	3	3	4	4	4	4	4	4	3	4	3	4	4	4	4	4
chr1:53230230-53231230	Ggod-Ggog-Gbeg-Ptrs-Ptrt-Ptre-Ptrv-Ppa-Hsa-Hde	1000	SCP2	5	2	5	5	2	3	5	4	4	4	4	5	5	6	5	4	5	2	5	5	5	4	5	2	5	5	5	2	5	2	4	2	5	5	4	4	4	5	5	5	5	5	5	5	5	4
chr1:53233081-53234187	Pab-Ppy-Ggod-Ggog-Gbeg-Ptrs-Ptrt-Ptre-Ptrv-Ppa-Hsa-Hde	1106	SCP2	3	4	3	4	3	4	4	4	4	4	4	3	4	4	3	4	4	3	4	4	4	4	4	4	5	4	4	4	3	4	4	5	3	4	5	4	4	4	3	4	3	3	4	4	5	5
chr1:53309712-53311740	Pab-Ppy-Ggod-Ggog-Gbeg-Ptrs-Ptrt-Ptre-Ptrv-Ppa-Hsa-Hde	2028	PODN	4	4	4	4	4	4	4	4	3	4	3	4	4	5	4	3	4	4	4	4	3	4	4	4	4	4	4	4	4	4	4	4	4	4	4	4	4	3	4	4	4	3	4	5	4	4
chr1:53930134-53932986	Gbeg	2852	GLIS1	3	2	3	2	1	2	2	3	3	2	2	2	2	2	3	2	3	1	3	3	2	2	3	1	2	2	2	1	2	2	3	2	2	2	2	2	2	2	2	2	2	2	2	2	3	2
chr1:54211501-54214530	Pab-Ppy-Ggod-Ggog-Gbeg-Ptrs-Ptrt-Ptre-Ptrv-Ppa-Hsa-Hde	3029		12	13	13	12	12	14	14	13	12	11	10	12	12	12	12	12	13	13	13	13	13	12	12	13	12	12	12	12	13	13	13	13	13	13	13	13	12	12	12	11	11	13	12	13	12	13
chr1:54328095-54328709	Pab-Ppy-Ggod-Ggog-Gbeg-Ptrs-Ptrt-Ptre-Ptrv-Ppa-Hsa-Hde	614	TCEANC2	4	10	7	5	10	10	6	5	6	4	5	6	6	4	6	6	6	11	5	6	6	6	5	9	4	5	6	9	6	10	6	11	5	5	5	6	6	6	5	5	5	5	5	6	5	5
chr1:54763728-54779279	Pab-Ppy-Ggod-Ggog-Gbeg-Ptrs-Ptrt-Ptre-Ptrv-Ppa-Hsa-Hde	15551		15	15	12	12	14	15	13	15	11	14	13	12	12	14	12	12	13	14	15	14	12	15	12	15	16	15	13	13	15	12	13	14	12	12	15	13	15	12	12	13	11	12	15	15	13	13
chr1:55349720-55358328	Pab-Ppy	8608	USP24	2	4	2	2	4	4	2	2	2	2	2	2	2	3	2	2	2	3	2	2	2	2	2	4	1	2	2	4	2	4	2	4	2	2	2	2	2	2	2	2	2	2	2	3	2	2
chr1:55460928-55467382	Pab-Ppy-Ggod-Ggog-Gbeg-Ptrs-Ptrt-Ptre-Ptrv-Ppa-Hsa-Hde	6454	MIR4422	4	4	5	5	4	5	5	5	5	4	4	4	4	5	4	5	4	4	4	5	5	4	4	4	4	4	4	4	4	4	4	5	3	4	5	5	5	4	4	4	4	4	4	5	4	5
chr1:56025491-56031358	Pab-Ppy-Ggod-Ggog-Gbeg-Ptrs-Ptrt-Ptre-Ptrv-Ppa-Hsa-Hde	5867		5	6	5	5	5	6	5	4	5	4	4	5	5	6	5	5	5	5	5	6	4	4	5	5	5	4	4	6	5	6	5	6	5	5	5	5	4	4	5	5	5	5	5	6	5	5
chr1:56445882-56450007	Pab-Ppy-Ggod-Ggog-Gbeg-Ptrs-Ptrt-Ptre-Ptrv-Ppa-Hsa-Hde	4125		5	6	3	3	5	6	3	5	4	5	4	4	3	6	4	4	4	6	6	3	4	5	3	6	5	5	4	5	5	5	3	6	3	3	5	3	5	4	4	4	3	3	5	6	6	5
chr1:56775672-56778054	Pab-Ppy-Ggod-Ggog-Gbeg-Ptrs-Ptrt-Ptre-Ptrv-Ppa-Hsa-Hde	2382	PPAP2B	14	15	13	11	14	16	14	16	13	15	13	13	13	14	13	12	13	14	15	14	13	15	14	15	16	15	15	14	17	15	14	15	12	13	15	14	15	12	12	13	13	13	15	15	15	15
chr1:56823264-56824380	Pab-Ppy-Ggod-Ggog-Gbeg-Ptrs-Ptrt-Ptre-Ptrv-Ppa-Hsa-Hde	1116		4	5	4	4	4	4	4	4	4	4	4	4	4	4	4	5	4	5	4	4	4	4	4	5	4	4	5	4	4	5	4	5	4	4	4	4	4	4	4	4	4	4	4	5	4	4
chr1:56856905-56859054	Pab-Ppy-Ggod-Ggog-Gbeg-Ptrs-Ptrt-Ptre-Ptrv-Ppa-Hsa-Hde	2149		14	11	12	11	14	11	9	10	11	12	11	13	13	12	11	15	14	14	10	10	14	12	12	14	12	13	14	13	13	12	9	12	13	14	10	10	13	11	14	12	14	12	12	12	10	10
chr1:57843723-57845996	Pab-Ppy-Ggod-Ggog-Gbeg-Ptrs-Ptrt-Ptre-Ptrv-Ppa-Hsa-Hde	2273	DAB1	4	5	5	4	5	5	5	4	4	4	4	4	5	5	4	5	5	5	4	5	4	5	4	6	5	4	5	5	5	5	5	5	5	5	4	4	5	5	4	5	5	4	5	4	4	4
chr1:58285837-58294799	Pab-Ppy-Ggod-Ggog-Gbeg-Ptrs-Ptrt-Ptre-Ptrv-Ppa-Hsa-Hde	8962	DAB1	31	35	31	31	32	33	32	34	30	33	30	29	30	33	31	25	30	31	32	31	30	35	31	32	36	35	32	31	39	31	31	34	29	30	36	30	33	30	29	31	28	31	29	34	33	36
chr1:58868282-58869755	Pab-Ppy-Ggod-Ggog-Gbeg-Ptrs-Ptrt-Ptre-Ptrv-Ppa-Hsa-Hde	1473		3	4	6	6	4	4	6	4	5	4	3	6	6	6	5	5	5	4	3	6	6	3	5	4	3	3	6	4	4	4	6	4	6	5	3	5	4	5	5	6	5	6	3	6	3	3
chr1:59233220-59241922	Pab-Ppy-Ggod-Ggog-Gbeg-Ptrs-Ptrt-Ptre-Ptrv-Ppa-Hsa-Hde	8702		5	6	6	6	5	7	6	6	6	6	5	5	6	6	6	7	5	6	6	5	6	6	6	6	6	6	6	5	6	6	5	7	5	5	6	6	6	6	5	6	5	5	6	6	6	6
chr1:60335715-60336215	Pab-Ppy-Ggod-Ggog-Gbeg-Ptrs-Ptrt-Ptre-Ptrv-Ppa-Hsa-Hde	500		3	5	3	3	4	4	4	4	3	4	3	3	4	4	3	5	3	4	4	3	3	3	3	4	4	4	3	4	4	4	4	5	4	4	4	4	4	4	3	4	3	3	4	3	3	3
chr1:60786869-60796158	Pab-Ppy	9289		2	4	2	3	4	4	2	2	2	2	2	2	2	2	2	2	2	4	2	2	2	2	2	4	2	2	2	4	2	4	2	4	2	2	2	2	2	2	2	2	2	2	2	2	2	2
chr1:63500250-63500841	Pab-Ppy-Ggod-Ggog-Gbeg-Ptrs-Ptrt-Ptre-Ptrv-Ppa-Hsa-Hde	591	LINC00466	4	5	4	4	4	4	4	5	4	4	4	4	5	4	4	4	4	4	5	4	5	4	4	5	4	5	4	4	4	5	4	5	4	4	4	4	4	5	4	4	4	4	4	5	4	4
chr1:64027102-64028180	Pab-Ppy-Ggod-Ggog-Gbeg-Ptrs-Ptrt-Ptre-Ptrv-Ppa-Hsa-Hde	1078	ROR1	5	6	6	4	6	6	5	5	6	4	4	5	4	4	5	5	5	6	5	5	5	5	6	5	4	5	5	5	5	6	5	6	5	5	5	6	4	5	5	5	4	5	4	5	5	6
chr1:64079744-64082920	Pab-Ppy-Ggod-Ggog-Gbeg-Ptrs-Ptrt-Ptre-Ptrv-Ppa-Hsa-Hde	3176	ROR1	4	3	4	4	3	4	4	4	3	4	3	4	3	3	4	3	3	4	4	4	3	3	4	3	4	4	4	4	4	4	3	3	3	3	4	3	4	4	4	4	3	4	4	4	3	4
chr1:64298576-64299172	Gbeg	596	ROR1	2	2	2	3	2	2	3	3	3	2	2	2	2	2	2	2	2	2	2	2	2	2	3	2	2	2	2	2	2	3	2	2	2	3	3	3	2	3	2	2	2	2	3	2	2	3
chr1:65156184-65157046	Pab-Ppy-Ggod-Ggog-Gbeg-Ptrs-Ptrt-Ptre-Ptrv-Ppa-Hsa-Hde	862	JAK1	4	4	4	4	4	4	4	4	4	4	3	4	4	4	4	4	5	4	4	5	4	4	4	4	4	4	4	4	3	4	4	4	4	4	4	4	4	4	4	4	4	4	3	5	4	5
chr1:65222530-65223977	Pab-Ppy-Ggod-Ggog-Gbeg-Ptrs-Ptrt-Ptre-Ptrv-Ppa-Hsa-Hde	1447		3	4	3	4	3	4	4	4	3	4	3	4	3	4	3	3	3	4	4	3	3	3	3	4	3	4	4	4	4	4	3	4	3	3	4	3	3	4	4	3	4	3	3	4	4	3
chr1:65391201-65392981	Pab-Ppy-Ggod-Ggog-Gbeg-Ptrs-Ptrt-Ptre-Ptrv-Ppa-Hsa-Hde	1780	AK4	4	5	5	4	5	5	5	4	4	4	3	4	4	4	4	4	4	5	4	4	4	4	4	5	4	4	5	5	5	5	4	5	5	4	4	5	4	4	4	4	4	5	4	5	4	4
chr1:65464147-65466089	Pab-Ppy-Ggod-Ggog-Gbeg-Ptrs-Ptrt-Ptre-Ptrv-Ppa-Hsa-Hde	1942	AK4	4	8	4	4	6	6	4	4	3	4	4	4	3	8	3	3	4	5	4	4	4	4	3	5	4	3	4	6	4	7	3	6	4	4	4	4	4	3	4	4	4	3	4	8	4	4
chr1:65466716-65468148	Hsa-Hde	1432	AK4	2	2	2	2	2	2	2	2	3	2	2	2	3	4	3	2	2	2	2	3	3	2	3	2	2	2	2	2	2	2	2	2	2	2	2	2	2	2	2	2	2	2	2	4	2	2
chr1:67649277-67652626	Pab-Ppy-Ggod-Ggog-Gbeg-Ptrs-Ptrt-Ptre-Ptrv-Ppa-Hsa-Hde	3349	SERBP1	6	6	7	6	6	7	6	7	6	7	6	6	6	7	6	5	7	6	6	6	6	7	6	6	7	6	7	5	7	6	7	7	6	6	7	6	7	6	5	6	6	7	7	6	6	7
chr1:67891415-67899014	Pab-Ppy-Ggod-Ggog-Gbeg-Ptrs-Ptrt-Ptre-Ptrv-Ppa-Hsa-Hde	7599		4	4	4	5	4	3	5	4	5	4	3	4	6	4	4	6	5	4	4	5	5	5	4	4	5	4	5	3	4	3	5	4	5	5	4	5	4	4	5	5	4	4	5	4	4	5
chr1:68398854-68400682	Pab-Ppy-Ggod-Ggog-Gbeg-Ptrs-Ptrt-Ptre-Ptrv-Ppa-Hsa-Hde	1828	GNG12-AS1,WLS	15	23	12	11	22	20	11	14	12	18	13	9	12	19	11	12	11	20	14	12	12	14	11	20	17	19	12	23	16	25	12	25	12	11	15	11	15	12	11	13	11	11	16	20	19	13
chr1:68480742-68482691	Pab-Ppy-Ggod-Ggog-Gbeg-Ptrs-Ptrt-Ptre-Ptrv-Ppa-Hsa-Hde	1949		11	10	10	9	9	11	9	12	9	10	9	9	9	10	9	9	8	10	10	9	9	11	8	12	9	11	8	9	13	10	9	10	9	9	11	10	10	9	9	8	8	9	9	10	10	11
chr1:68613075-68613896	Pab-Ppy-Ggod-Ggog-Gbeg-Ptrs-Ptrt-Ptre-Ptrv-Ppa-Hsa-Hde	821		5	6	5	4	6	7	5	6	4	6	5	5	5	5	4	4	4	6	5	5	5	6	5	5	5	6	5	5	5	6	5	6	5	4	6	4	5	5	4	5	4	5	6	6	5	5
chr1:68713862-68715698	Pab-Ppy-Ggod-Ggog-Gbeg-Ptrs-Ptrt-Ptre-Ptrv-Ppa-Hsa-Hde	1836	DEPDC1	4	5	4	4	4	5	4	4	5	5	4	4	4	4	5	4	5	4	5	5	4	5	5	5	5	4	6	4	4	5	4	5	5	4	4	4	4	5	4	6	4	4	5	5	4	4
chr1:68719750-68722499	Pab-Ppy-Ggod-Ggog-Gbeg-Ptrs-Ptrt-Ptre-Ptrv-Ppa-Hsa-Hde	2749	DEPDC1	4	5	3	4	4	5	4	4	4	5	4	4	3	4	4	4	4	5	4	4	4	4	4	4	5	4	5	4	3	5	4	5	4	4	4	5	6	5	4	4	4	4	5	4	4	5
chr1:70500118-70500970	Pab-Ppy	852	ANKRD13C	2	4	2	2	4	5	2	2	2	2	2	2	2	2	2	1	2	4	2	2	2	2	2	3	3	2	2	4	2	4	2	4	2	2	2	2	1	2	2	2	1	1	2	2	2	2
chr1:70768824-70775049	Pab-Ppy-Ggod-Ggog-Gbeg-Ptrs-Ptrt-Ptre-Ptrv-Ppa-Hsa-Hde	6225		6	5	5	5	5	5	5	5	5	6	5	4	5	6	4	5	4	5	6	5	4	6	5	5	5	5	5	5	5	5	5	5	4	4	5	4	6	6	5	5	5	5	5	7	6	5
chr1:71289698-71292811	Pab-Ppy-Ggod-Ggog-Gbeg-Ptrs-Ptrt-Ptre-Ptrv-Ppa-Hsa-Hde	3113	ZRANB2-AS1	4	5	4	5	4	4	4	5	4	4	3	3	4	4	4	4	5	4	4	5	4	4	4	4	4	4	4	4	5	4	4	5	4	4	4	4	4	4	4	4	4	3	4	4	4	4
chr1:72512554-72513187	Pab-Ppy-Ggod-Ggog-Gbeg-Ptrs-Ptrt-Ptre-Ptrv-Ppa-Hsa-Hde	633	NEGR1	3	4	3	3	3	4	3	4	4	3	3	3	3	4	3	3	3	4	4	4	3	4	4	4	4	3	4	4	4	3	3	4	4	4	4	4	4	3	3	3	3	3	4	4	4	4
chr1:72538686-72545950	Pab-Ppy-Ggod-Ggog-Gbeg-Ptrs-Ptrt-Ptre-Ptrv-Ppa-Hsa-Hde	7264		7	8	7	6	6	7	7	7	7	7	6	6	7	8	6	7	7	7	7	7	7	8	6	8	8	8	7	6	8	8	7	8	7	7	7	7	8	6	6	7	6	6	7	6	7	7
chr1:73337547-73345976	Pab-Ppy-Ggod-Ggog-Gbeg-Ptrs-Ptrt-Ptre-Ptrv-Ppa-Hsa-Hde	8429		12	15	12	12	13	14	10	11	12	10	10	11	11	11	11	11	11	13	12	10	12	10	12	13	11	11	11	12	11	16	10	16	11	12	12	9	11	13	11	10	11	11	10	12	12	12
chr1:75819843-75821063	Pab-Ppy-Ggod-Ggog-Gbeg-Ptrs-Ptrt-Ptre-Ptrv-Ppa-Hsa-Hde	1220	SLC44A5	9	10	11	10	9	10	11	11	11	9	8	9	10	10	10	10	10	9	10	10	10	9	10	9	10	9	10	9	10	10	9	10	10	10	10	10	10	11	9	9	10	10	11	11	10	10
chr1:75980989-75982688	Pab-Ppy-Ggod-Ggog-Gbeg-Ptrs-Ptrt-Ptre-Ptrv-Ppa-Hsa-Hde	1699	ACADM	4	4	4	4	3	4	4	4	4	4	3	3	3	4	4	4	3	4	4	4	4	3	4	4	4	4	4	3	3	4	4	4	3	4	4	4	3	4	4	3	4	3	3	4	4	4
chr1:76933563-76939029	Pab-Ppy-Ggod-Ggog-Gbeg-Ptrs-Ptrt-Ptre-Ptrv-Ppa-Hsa-Hde	5466		6	6	7	7	5	6	7	7	7	6	5	5	6	6	7	6	5	5	7	6	6	6	7	5	6	6	6	5	6	6	8	6	6	6	7	6	6	7	6	7	6	6	6	6	7	7
chr1:77367417-77372492	Pab-Ppy-Ggod-Ggog-Gbeg-Ptrs-Ptrt-Ptre-Ptrv-Ppa-Hsa-Hde	5075	PIGK	31	27	34	32	26	28	33	32	32	28	24	31	31	32	31	44	31	29	32	33	28	32	32	26	30	30	30	25	35	28	29	26	32	29	33	36	29	32	31	30	29	29	29	31	32	31
chr1:77924786-77932964	Pab-Ppy-Ggod-Ggog-Gbeg-Ptrs-Ptrt-Ptre-Ptrv-Ppa-Hsa-Hde	8178		12	13	19	13	11	14	14	12	15	9	8	13	12	10	16	7	13	12	14	14	11	10	15	16	10	10	10	14	16	12	15	13	11	11	14	12	10	14	11	11	12	15	9	11	13	14
chr1:78010295-78017313	Pab-Ppy-Ggod-Ggog-Gbeg-Ptrs-Ptrt-Ptre-Ptrv-Ppa-Hsa-Hde	7018		10	11	8	8	10	10	9	10	8	10	9	8	8	12	8	8	8	10	11	8	8	9	8	10	11	9	9	9	11	12	8	12	8	8	10	9	11	9	8	9	8	8	10	12	10	10
chr1:78048402-78050988	Pab-Ppy-Ggod-Ggog-Gbeg-Ptrs-Ptrt-Ptre-Ptrv-Ppa-Hsa-Hde	2586	FAM73A	5	5	4	5	4	5	5	5	5	4	3	4	4	7	4	5	4	4	4	4	3	4	4	4	4	5	2	5	5	5	5	5	2	4	5	5	4	5	4	5	3	4	4	7	4	5
chr1:78086105-78087068	Pab-Ppy-Ggod-Ggog-Gbeg-Ptrs-Ptrt-Ptre-Ptrv-Ppa-Hsa-Hde	963	FAM73A	4	5	5	3	4	5	5	4	4	3	2	4	4	5	4	6	4	4	4	4	3	4	4	4	4	4	4	4	4	5	4	5	4	3	4	4	4	4	4	4	4	4	4	5	4	5
chr1:78530558-78535523	Pab-Ppy-Ggod-Ggog-Gbeg-Ptrs-Ptrt-Ptre-Ptrv-Ppa-Hsa-Hde	4965	MGC27382	5	5	5	4	5	5	5	5	5	5	4	5	4	5	4	5	5	6	4	5	5	4	5	5	6	5	5	5	5	5	5	5	5	5	5	5	5	4	5	5	4	5	5	6	5	5
chr1:78548083-78555525	Pab-Ppy-Ggod-Ggog-Gbeg-Ptrs-Ptrt-Ptre-Ptrv-Ppa-Hsa-Hde	7442	MGC27382	3	4	4	3	4	5	4	3	3	3	3	4	4	4	4	3	4	5	3	4	4	4	4	4	4	4	3	3	3	4	4	4	4	4	4	4	4	4	5	4	4	4	3	4	4	3
chr1:79291922-79294274	Pab-Ppy-Ggod-Ggog-Gbeg-Ptrs-Ptrt-Ptre-Ptrv-Ppa-Hsa-Hde	2352		5	5	5	5	5	5	5	5	5	5	4	5	5	5	5	5	4	5	5	5	5	5	5	5	5	5	5	5	5	5	5	5	5	5	4	5	4	5	5	5	5	5	5	5	5	5
chr1:79759478-79762227	Pab-Ppy-Ggod-Ggog-Gbeg-Ptrs-Ptrt-Ptre-Ptrv-Ppa-Hsa-Hde	2749		6	5	6	7	6	6	7	7	6	6	4	6	6	5	5	6	6	5	9	7	6	6	6	5	5	5	6	5	6	6	6	5	6	6	7	7	6	6	6	6	6	6	7	5	6	6
chr1:80328649-80330495	Pab-Ppy-Ggod-Ggog-Gbeg-Ptrs-Ptrt-Ptre-Ptrv-Ppa-Hsa-Hde	1846		4	3	4	4	3	4	4	4	3	4	3	4	4	4	4	3	4	4	3	4	4	4	3	4	4	4	4	3	4	3	4	4	4	4	4	4	4	4	4	4	3	4	4	3	4	4
chr1:80521544-80522044	Pab-Ppy-Ggod-Ggog-Gbeg-Ptrs-Ptrt-Ptre-Ptrv-Ppa-Hsa-Hde	500		4	5	4	4	4	5	5	5	4	4	4	4	4	4	4	5	4	4	4	4	4	4	4	5	4	4	4	4	5	5	4	5	4	3	4	4	5	4	4	4	4	4	5	4	4	6
chr1:80688983-80691556	Pab-Ppy-Ggod-Ggog-Gbeg-Ptrs-Ptrt-Ptre-Ptrv-Ppa-Hsa-Hde	2573		22	23	19	19	22	22	20	23	19	24	21	18	20	22	19	23	21	23	24	20	21	25	19	24	26	24	21	20	26	22	20	23	19	20	24	18	27	20	19	20	17	19	25	23	22	22
chr1:81314506-81319218	Pab-Ppy-Ggod-Ggog-Gbeg-Ptrs-Ptrt-Ptre-Ptrv-Ppa-Hsa-Hde	4712		10	44	6	6	3	22	4	10	5	8	14	5	8	2	5	6	9	3	8	4	22	13	4	4	47	10	40	3	6	4	5	12	9	17	39	5	13	8	6	21	6	78	64	4	7	9
chr1:81335882-81337670	Pab-Ppy-Ggod-Ggog-Gbeg-Ptrs-Ptrt-Ptre-Ptrv-Ppa-Hsa-Hde	1788		18	20	24	20	17	20	24	20	23	18	16	22	23	20	22	26	23	17	20	22	22	17	22	19	18	18	22	16	19	18	24	19	22	21	19	24	20	24	21	21	21	22	19	21	19	20
chr1:81431366-81433090	Pab-Ppy	1724		2	3	2	2	4	3	2	2	2	2	2	2	2	3	2	2	2	4	2	2	2	2	2	4	2	2	2	4	2	4	2	3	2	2	2	3	2	2	2	2	2	2	2	2	2	2
chr1:81446941-81447636	Pab-Ppy-Ggod-Ggog-Gbeg-Ptrs-Ptrt-Ptre-Ptrv-Ppa-Hsa-Hde	695		5	4	5	6	5	5	6	6	5	5	4	4	5	5	5	5	4	4	5	5	5	5	5	5	5	5	5	5	5	5	6	5	5	5	6	5	5	5	5	4	5	5	5	5	6	5
chr1:81664757-81667566	Pab-Ppy-Ggod-Ggog-Gbeg-Ptrs-Ptrt-Ptre-Ptrv-Ppa-Hsa-Hde	2809		5	5	5	5	5	6	6	6	5	5	4	5	5	5	5	6	6	5	5	5	5	5	5	5	6	5	6	5	6	5	5	5	5	5	5	6	6	5	5	5	5	5	6	5	5	6
chr1:81739797-81743789	Hsa-Hde	3992		2	2	2	2	1	1	2	1	2	2	2	2	2	4	2	1	2	2	2	2	2	2	1	2	2	2	2	2	2	2	1	1	2	2	2	2	2	2	2	2	2	2	2	4	1	2
chr1:81833161-81835096	Pab-Ppy-Ggod-Ggog-Gbeg-Ptrs-Ptrt-Ptre-Ptrv-Ppa-Hsa-Hde	1935		5	6	5	5	5	6	5	5	5	5	4	5	5	5	5	5	5	6	5	5	5	5	4	6	5	5	5	6	5	5	5	5	5	5	5	5	5	5	5	5	5	5	5	5	5	5
chr1:81958811-81962733	Pab-Ppy-Ggod-Ggog-Gbeg-Ptrs-Ptrt-Ptre-Ptrv-Ppa-Hsa-Hde	3922		8	10	9	9	8	10	8	8	9	7	7	7	8	8	9	6	7	9	8	8	7	7	8	8	7	7	8	8	10	10	8	9	8	8	8	8	7	8	8	8	8	9	8	9	8	8
chr1:82322647-82323831	Pab-Ppy-Ggod-Ggog-Gbeg-Ptrs-Ptrt-Ptre-Ptrv-Ppa-Hsa-Hde	1184		4	4	3	3	3	4	4	3	4	3	3	3	3	4	3	3	3	4	4	3	3	3	3	4	3	4	4	4	4	4	4	3	4	4	3	4	3	4	3	4	3	3	4	4	4	4
chr1:83309518-83370671	ils_clades_CHIMP-BONOBO-EASTERN_GORILLA-WESTERN_GORILLA	61153		3	2	3	4	2	2	4	4	4	4	3	4	4	2	4	4	4	2	4	4	4	4	4	2	3	4	4	2	3	2	4	2	4	4	4	4	3	4	4	4	4	4	4	2	4	4
chr1:83370671-83402978	Ggod-Ggog-Gbeg-Ptrs-Ptrt-Ptre-Ptrv-Ppa-Hsa-Hde	32307		5	2	3	4	2	2	4	6	4	7	6	4	4	5	4	4	4	2	6	4	4	7	4	2	6	6	4	2	5	2	4	2	4	4	6	5	5	4	4	4	4	4	7	6	7	7
chr1:83414169-83420242	Ptrs-Ptrt-Ptre-Ptrv-Ppa-Hsa-Hde	6073		2	2	2	2	2	2	2	7	2	3	4	2	2	4	2	2	2	1	7	2	2	3	2	2	4	3	1	2	4	2	2	2	2	2	7	2	4	2	2	2	2	2	6	5	7	7
chr1:83426942-83454249	Ggod-Ggog-Gbeg-Ptrs-Ptrt-Ptre-Ptrv-Ppa-Hsa-Hde	27307		7	2	4	4	2	2	4	8	4	8	7	4	4	4	4	4	4	2	8	4	4	8	4	2	7	8	4	2	6	2	4	2	4	4	8	4	6	4	4	4	4	4	8	6	8	8
chr1:83454249-83454869	Ptrs-Ptrt-Ptre-Ptrv-Ppa	620		3	1	2	2	1	1	2	4	2	4	3	2	2	2	2	2	2	1	4	2	2	4	2	1	3	4	2	1	4	1	3	1	2	2	4	2	4	2	2	2	2	2	4	4	4	5
chr1:83455476-83456797	Ggod-Ggog-Gbeg-Ptrs-Ptrt-Ptre-Ptrv-Ppa-Hsa-Hde	1321		7	2	3	4	2	2	4	8	4	8	7	3	3	4	4	4	4	2	8	4	4	8	4	2	6	7	4	1	7	2	4	2	4	4	8	4	7	4	4	4	3	3	8	5	8	9
chr1:83456797-83508463	Ptrs-Ptrt-Ptre-Ptrv-Ppa-Hsa-Hde	51666		6	2	2	2	2	2	2	7	2	7	6	2	2	4	2	2	2	2	7	2	2	7	2	2	6	7	2	2	7	2	2	2	2	2	7	2	6	2	2	2	2	2	7	5	8	8
chr1:83508463-83599573	Hsa-Hde	91110		2	2	2	2	2	2	2	2	2	2	2	2	2	4	2	2	2	2	2	2	2	2	2	2	2	2	2	2	2	2	2	2	2	2	2	2	2	2	2	2	2	2	2	5	2	2
chr1:83599573-83601741	Ptrs-Ptrt-Ptre-Ptrv-Ppa-Hsa-Hde	2168		8	2	1	2	2	2	2	9	2	9	7	2	2	5	2	2	2	2	8	2	2	9	2	2	8	9	2	2	7	3	2	2	2	2	9	2	6	2	2	2	2	2	9	6	8	9
chr1:83601741-83727939	Ggod-Ggog-Gbeg-Ptrs-Ptrt-Ptre-Ptrv-Ppa-Hsa-Hde	126198		7	2	3	4	2	2	4	8	4	8	6	4	4	4	4	4	4	2	8	4	4	8	4	2	7	8	4	2	6	2	4	2	4	4	8	4	7	4	4	4	4	4	8	6	8	8
chr1:84653177-84654105	Pab-Ppy	928	DNASE2B	2	4	3	2	4	5	2	2	3	2	2	2	2	3	2	2	2	4	2	3	3	2	2	4	2	2	2	5	2	5	2	5	2	2	2	3	2	2	2	2	2	3	2	2	2	2
chr1:84736520-84737020	Pab-Ppy-Ggod-Ggog-Gbeg-Ptrs-Ptrt-Ptre-Ptrv-Ppa-Hsa-Hde	500	RPF1,GNG5	4	5	5	4	4	4	4	3	4	3	4	5	4	4	4	4	4	4	4	4	4	4	4	5	4	3	5	4	4	3	4	4	5	5	4	4	4	5	5	4	5	4	4	4	4	4
chr1:85745150-85778418	Hsa-Hde	33268	DDAH1	2	2	2	2	2	2	2	2	2	2	2	2	2	4	2	2	2	2	2	2	2	2	2	2	2	2	2	2	2	2	2	2	2	2	2	2	2	2	2	2	2	2	2	4	2	2
chr1:86739243-86743050	Pab-Ppy-Ggod-Ggog-Gbeg-Ptrs-Ptrt-Ptre-Ptrv-Ppa-Hsa-Hde	3807		6	8	4	5	6	8	5	7	5	5	5	4	4	5	4	4	4	8	6	5	4	6	4	7	5	6	4	6	7	7	4	8	4	4	7	5	6	4	4	4	4	4	5	5	5	7
chr1:86743550-86746645	Pab-Ppy-Ggod-Ggog-Gbeg-Ptrs-Ptrt-Ptre-Ptrv-Ppa-Hsa-Hde	3095		6	8	5	5	6	8	5	6	5	5	5	5	5	7	5	5	5	7	7	5	5	6	5	7	6	5	6	6	6	7	5	8	5	5	6	5	6	5	4	5	4	5	6	6	6	6
chr1:87016939-87027528	Pab-Ppy-Ggod-Ggog-Gbeg-Ptrs-Ptrt-Ptre-Ptrv-Ppa-Hsa-Hde	10589		10	8	11	10	8	9	11	11	11	10	8	10	10	10	11	15	10	9	11	11	9	11	11	8	10	11	10	8	11	9	10	9	10	10	11	11	10	10	10	10	9	10	10	10	11	11
chr1:87282335-87283833	Pab-Ppy-Ggod-Ggog-Gbeg-Ptrs-Ptrt-Ptre-Ptrv-Ppa-Hsa-Hde	1498	HS2ST1	4	5	4	3	4	5	4	4	4	4	3	4	4	5	4	4	4	4	3	4	4	3	4	4	3	4	4	4	4	4	4	4	3	3	4	4	3	4	4	4	4	3	3	4	4	4
chr1:87658161-87676648	Pab-Ppy-Ggod-Ggog-Gbeg-Ptrs-Ptrt-Ptre-Ptrv-Ppa-Hsa-Hde	18487		6	4	3	4	3	4	3	6	3	6	5	3	4	5	3	3	3	4	6	4	3	6	3	4	6	6	4	4	6	3	3	4	3	3	6	3	6	3	3	3	3	4	5	5	6	6
chr1:87678805-87681334	ils_clades_HUMAN-CHIMP-BONOBO-ORANGUTAN	2529		4	3	1	2	3	4	2	7	2	4	3	2	2	6	2	2	2	3	7	2	2	4	2	3	6	4	2	3	3	4	2	4	2	2	7	2	4	2	2	2	2	2	6	6	7	6
chr1:87686428-87690921	Pab-Ppy-Ggod-Ggog-Gbeg-Ptrs-Ptrt-Ptre-Ptrv-Ppa-Hsa-Hde	4493		6	4	4	4	4	4	3	7	3	7	6	3	4	5	3	3	4	3	7	3	3	6	3	4	6	6	3	4	7	4	4	4	3	3	7	3	6	3	3	3	3	3	6	5	7	6
chr1:87704377-87712087	Ptrs-Ptrt-Ptre-Ptrv-Ppa	7710		4	2	2	2	2	2	2	4	2	4	4	2	2	2	2	2	2	2	4	2	2	4	2	2	4	4	2	2	4	2	2	2	2	2	4	2	4	2	2	2	2	2	4	2	4	5
chr1:87712087-87738566	Pab-Ppy-Ggod-Ggog-Gbeg-Ptrs-Ptrt-Ptre-Ptrv-Ppa-Hsa-Hde	26479		6	4	3	3	3	4	3	7	3	6	6	3	3	5	3	3	3	3	7	3	3	6	3	4	7	6	3	3	6	4	3	4	3	3	7	3	6	3	3	3	3	3	6	5	7	7
chr1:87740571-87746463	Ggod-Ggog-Gbeg-Ptrs-Ptrt-Ptre-Ptrv-Ppa-Hsa-Hde	5892		3	2	3	3	2	2	3	5	4	5	4	3	3	3	3	3	3	2	5	3	3	5	3	2	4	5	4	2	4	2	4	2	3	3	6	3	5	3	3	3	3	4	6	4	5	5
chr1:87746463-87951312	Ptrs-Ptrt-Ptre-Ptrv-Ppa	204849		4	2	2	2	2	2	2	4	2	4	3	2	2	2	2	2	2	2	4	2	2	4	2	2	4	4	2	2	4	2	2	2	2	2	4	2	4	2	2	2	2	2	4	2	4	4
chr1:87951312-87962355	Ptrs-Ptrt-Ptre-Ptrv	11043		4	2	2	2	2	2	2	2	2	4	3	2	2	2	2	2	2	2	3	2	2	4	2	2	4	4	2	2	4	2	2	2	2	2	2	2	4	2	2	2	2	2	4	2	2	2
chr1:88813205-88832642	Pab-Ppy-Ggod-Ggog-Gbeg-Ptrs-Ptrt-Ptre-Ptrv-Ppa-Hsa-Hde	19437		4	4	4	4	4	4	4	4	4	4	3	4	4	4	4	4	4	4	4	4	4	4	4	4	3	4	4	4	4	4	4	4	4	4	4	4	4	4	4	4	4	4	4	5	4	4
chr1:89067074-89067574	Pab-Ppy-Ggod-Ggog-Gbeg-Ptrs-Ptrt-Ptre-Ptrv-Ppa-Hsa-Hde	500	PKN2	5	5	5	5	5	5	6	5	5	6	5	5	5	5	5	4	4	5	5	5	5	5	4	5	5	5	5	4	5	4	4	5	5	5	6	5	5	4	5	5	5	5	5	6	5	6
chr1:89219548-89222009	Pab-Ppy-Ggod-Ggog-Gbeg-Ptrs-Ptrt-Ptre-Ptrv-Ppa-Hsa-Hde	2461	CCBL2,RBMXL1	8	11	9	8	8	10	10	10	9	8	8	8	9	9	8	8	8	8	9	9	9	10	8	9	8	8	8	8	12	9	9	10	8	9	10	9	11	8	8	8	7	8	8	8	8	9
chr1:89249082-89252679	Pab-Ppy-Ggod-Ggog-Gbeg-Ptrs-Ptrt-Ptre-Ptrv-Ppa-Hsa-Hde	3597	GBP3	4	4	4	4	3	3	4	4	4	3	3	4	4	5	4	4	4	3	4	4	4	4	4	3	4	4	4	3	3	3	4	3	4	4	4	5	4	4	4	4	4	5	3	3	4	4
chr1:89294047-89295451	Pab-Ppy-Ggod-Ggog-Gbeg-Ptrs-Ptrt-Ptre-Ptrv-Ppa-Hsa-Hde	1404	GBP1	5	4	5	5	3	4	5	5	5	4	4	5	5	5	5	5	5	3	4	6	5	5	5	3	5	5	5	4	4	4	6	3	4	5	5	5	5	5	5	5	5	5	5	5	5	5
chr1:89297750-89301172	Ggod-Ggog-Gbeg-Ptrs-Ptrt-Ptre-Ptrv-Ppa-Hsa-Hde	3422	GBP1	4	2	4	4	2	2	4	4	3	3	3	4	3	4	4	3	3	2	4	4	4	4	3	2	4	4	4	2	3	2	4	2	4	3	3	4	4	3	3	4	3	4	3	4	4	4
chr1:89301172-89301672	Pab-Ppy-Ggod-Ggog-Gbeg-Ptrs-Ptrt-Ptre-Ptrv-Ppa-Hsa-Hde	500	GBP1	5	4	5	3	4	4	6	5	4	4	4	5	5	5	5	5	5	4	5	6	5	4	5	3	4	4	5	3	5	3	5	4	5	5	4	5	4	5	4	4	4	5	4	5	5	5
chr1:89302834-89303546	Ggod-Ggog-Gbeg-Ptrs-Ptrt-Ptre-Ptrv-Ppa-Hsa-Hde	712	GBP1	4	2	4	4	2	2	3	4	3	4	3	4	3	4	3	4	4	1	4	4	4	4	4	2	4	4	4	2	3	2	4	2	3	4	4	4	3	4	4	4	3	4	4	4	4	4
chr1:89340731-89343228	Pab-Ppy-Ggod-Ggog-Gbeg-Ptrs-Ptrt-Ptre-Ptrv-Ppa-Hsa-Hde	2497		4	4	5	4	4	4	4	4	4	6	5	4	5	5	5	4	4	4	4	5	4	6	5	4	5	7	4	5	7	4	4	4	4	5	4	4	5	4	4	4	5	5	4	5	4	4
chr1:89633251-89659553	Ggod-Ggog-Gbeg-Ptrs-Ptrt-Ptre-Ptrv-Ppa-Hsa-Hde	26302	GBP1P1	4	2	3	3	2	2	4	4	3	3	3	4	3	4	3	3	3	2	4	4	3	3	4	1	3	4	4	1	3	2	4	2	4	3	4	4	3	4	3	3	3	4	3	4	4	4
chr1:89899131-89900861	Pab-Ppy-Ggod-Ggog-Gbeg-Ptrs-Ptrt-Ptre-Ptrv-Ppa-Hsa-Hde	1730	LRRC8C	7	8	7	7	7	8	8	7	7	7	6	6	7	8	7	6	8	7	7	6	7	8	7	7	8	8	7	7	7	8	8	8	7	7	7	7	7	7	6	7	6	6	7	9	7	8
chr1:90519181-90522379	Pab-Ppy-Ggod-Ggog-Gbeg-Ptrs-Ptrt-Ptre-Ptrv-Ppa-Hsa-Hde	3198		6	6	4	5	7	7	5	6	5	7	6	5	5	12	5	5	5	6	6	5	5	6	5	6	7	6	5	7	6	6	5	7	5	5	6	5	6	5	5	5	5	5	7	11	7	7
chr1:90524786-90536374	Pab-Ppy-Ggod-Ggog-Gbeg-Ptrs-Ptrt-Ptre-Ptrv-Ppa-Hsa-Hde	11588		4	6	5	6	5	6	6	4	6	4	3	7	6	5	5	6	7	5	4	6	6	4	4	5	4	4	6	5	4	6	6	6	6	6	4	7	4	6	5	6	6	6	4	5	4	4
chr1:91261200-91263006	Pab-Ppy-Ggod-Ggog-Gbeg-Ptrs-Ptrt-Ptre-Ptrv-Ppa-Hsa-Hde	1806		11	14	12	12	12	14	12	13	12	12	9	11	11	14	12	13	12	13	13	12	12	11	12	14	12	12	13	14	15	15	11	14	11	12	13	12	11	12	12	12	11	11	13	14	12	13
chr1:91566476-91568239	Pab-Ppy-Ggod-Ggog-Gbeg-Ptrs-Ptrt-Ptre-Ptrv-Ppa-Hsa-Hde	1763	HFM1	4	4	4	3	3	4	4	4	4	4	3	4	4	4	4	4	3	4	4	3	5	3	4	4	3	4	4	4	4	5	4	5	3	3	4	3	4	5	3	3	4	4	4	4	4	4
chr1:91772348-91773500	Pab-Ppy-Ggod-Ggog-Gbeg-Ptrs-Ptrt-Ptre-Ptrv-Ppa-Hsa-Hde	1152		4	4	4	4	4	5	4	4	4	4	3	4	4	5	4	4	4	4	5	4	4	3	4	4	4	4	4	4	4	4	4	4	4	4	4	4	4	4	4	4	4	4	4	4	4	4
chr1:91833256-91839820	Pab-Ppy-Ggod-Ggog-Gbeg-Ptrs-Ptrt-Ptre-Ptrv-Ppa-Hsa-Hde	6564		9	11	10	9	11	11	10	9	9	10	8	10	10	11	10	11	10	12	9	10	9	10	10	11	9	10	10	10	9	11	9	11	10	9	9	11	9	9	10	10	10	9	9	11	10	10
chr1:91881008-91882303	Pab-Ppy-Ggod-Ggog-Gbeg-Ptrs-Ptrt-Ptre-Ptrv-Ppa-Hsa-Hde	1295	HSP90B3P	3	5	4	4	5	5	4	4	4	4	4	3	4	4	4	4	4	4	4	4	4	4	4	4	4	4	4	4	4	5	4	4	4	4	4	4	4	4	4	4	4	5	4	4	4	4
chr1:92308126-92315043	Pab-Ppy-Ggod-Ggog-Gbeg-Ptrs-Ptrt-Ptre-Ptrv-Ppa-Hsa-Hde	6917		9	11	8	7	11	11	8	9	7	8	7	8	9	10	8	8	8	11	9	7	8	9	7	12	9	8	7	11	9	11	8	11	8	8	9	8	10	7	7	7	7	8	9	10	8	10
chr1:92352802-92361053	Pab-Ppy-Ggod-Ggog-Gbeg-Ptrs-Ptrt-Ptre-Ptrv-Ppa-Hsa-Hde	8251	BTBD8	4	5	4	4	4	5	5	5	5	4	4	4	5	2	5	4	4	5	5	5	5	4	5	5	4	4	4	5	4	6	5	6	4	5	4	5	4	5	5	4	4	4	4	5	5	4
chr1:92466761-92469572	Pab-Ppy-Ggod-Ggog-Gbeg-Ptrs-Ptrt-Ptre-Ptrv-Ppa-Hsa-Hde	2811	C1orf146	8	9	7	8	10	9	7	7	8	8	7	7	7	8	8	9	8	7	8	7	7	7	7	8	8	8	8	10	8	16	7	10	7	7	8	7	7	8	7	8	7	7	7	8	8	7
chr1:93071051-93072276	Pab-Ppy-Ggod-Ggog-Gbeg-Ptrs-Ptrt-Ptre-Ptrv-Ppa-Hsa-Hde	1225	RPL5,FAM69A	7	8	8	7	8	8	7	7	7	8	7	7	7	8	7	13	7	8	8	7	8	7	7	10	9	8	9	10	9	9	7	9	8	8	7	7	9	8	8	9	8	8	9	9	8	8
chr1:93072871-93074556	Pab-Ppy-Ggod-Ggog-Gbeg-Ptrs-Ptrt-Ptre-Ptrv-Ppa-Hsa-Hde	1685	RPL5,FAM69A	8	10	9	8	10	11	8	10	9	10	8	8	8	11	9	12	9	11	10	9	9	9	9	10	10	9	9	9	11	12	8	11	9	8	10	9	9	9	8	9	8	8	10	11	10	10
chr1:93075451-93076167	Pab-Ppy-Ggod-Ggog-Gbeg-Ptrs-Ptrt-Ptre-Ptrv-Ppa-Hsa-Hde	716	RPL5,FAM69A,SNORD21	6	6	6	6	7	6	6	6	6	7	6	5	6	7	5	12	7	8	7	5	7	6	6	8	7	7	8	7	8	7	5	7	6	6	7	6	9	7	6	7	6	6	7	8	7	7
chr1:93079775-93080406	Pab-Ppy-Ggod-Ggog-Gbeg-Ptrs-Ptrt-Ptre-Ptrv-Ppa-Hsa-Hde	631	RPL5,FAM69A	4	5	5	5	5	4	5	5	4	5	4	5	5	6	4	10	5	6	5	5	5	4	5	6	6	5	8	6	5	5	4	5	5	5	4	4	8	4	4	6	5	5	7	5	4	4
chr1:93428957-93429987	Pab-Ppy-Ggod-Ggog-Gbeg-Ptrs-Ptrt-Ptre-Ptrv-Ppa-Hsa-Hde	1030	CCDC18	7	8	8	7	9	7	8	7	7	6	6	7	7	8	7	9	8	9	7	7	7	7	6	8	7	7	8	8	8	8	8	8	7	8	7	8	7	7	7	7	7	7	7	8	6	7
chr1:93514472-93534020	Pab-Ppy-Ggod-Ggog-Gbeg-Ptrs-Ptrt-Ptre-Ptrv-Ppa-Hsa-Hde	19548	CCDC18	8	8	9	7	8	9	7	7	8	8	7	8	8	9	8	13	8	11	8	8	8	8	8	10	9	9	10	8	8	8	8	8	8	8	7	7	10	8	9	8	8	7	8	9	8	7
chr1:93747701-93756296	Ggod-Ggog-Gbeg-Ptrs-Ptrt-Ptre-Ptrv-Ppa-Hsa-Hde	8595	FNBP1L	4	2	8	7	2	3	7	5	7	3	3	8	7	5	9	5	6	2	5	8	7	4	8	2	4	4	6	2	4	2	8	2	6	7	4	8	5	8	8	6	8	7	4	5	4	5
chr1:94539279-94542688	Pab-Ppy-Ggod-Ggog-Gbeg-Ptrs-Ptrt-Ptre-Ptrv-Ppa-Hsa-Hde	3409		4	5	4	5	4	4	5	4	4	4	3	3	4	3	4	4	4	4	5	4	4	4	4	4	4	4	4	4	4	5	4	6	4	4	4	4	4	5	4	4	4	4	4	5	5	4
chr1:94639889-94647074	Pab-Ppy-Ggod-Ggog-Gbeg-Ptrs-Ptrt-Ptre-Ptrv-Ppa-Hsa-Hde	7185		10	11	10	8	11	10	10	12	9	11	10	10	10	10	9	12	9	11	11	10	10	11	10	12	12	10	12	11	12	11	10	11	10	10	11	9	13	9	10	10	10	10	12	10	11	11
chr1:95917052-95919486	Ggod	2434		2	2	2	2	2	2	2	2	2	2	2	2	2	2	2	2	2	2	2	2	2	2	2	2	2	2	2	2	2	2	4	2	2	2	2	3	2	2	2	2	2	2	2	2	2	2
chr1:96203878-96205027	Pab-Ppy-Ggod-Ggog-Gbeg-Ptrs-Ptrt-Ptre-Ptrv-Ppa-Hsa-Hde	1149		14	9	12	9	19	9	10	10	11	13	11	13	13	13	11	17	12	20	10	10	14	13	10	25	12	13	13	17	13	10	10	10	14	13	11	9	15	11	13	11	13	12	13	12	10	11
chr1:96683831-96691598	Pab-Ppy-Ggod-Ggog-Gbeg-Ptrs-Ptrt-Ptre-Ptrv-Ppa-Hsa-Hde	7767		21	26	20	22	22	25	22	26	23	22	20	21	21	24	20	28	20	22	29	22	20	23	23	25	24	21	22	23	26	28	21	27	21	22	29	22	25	25	21	21	20	19	26	23	24	24
chr1:96916024-96919960	Pab-Ppy-Ggod-Ggog-Gbeg-Ptrs-Ptrt-Ptre-Ptrv-Ppa-Hsa-Hde	3936		14	17	20	17	15	18	19	17	18	13	12	18	19	14	18	21	19	15	15	18	19	13	18	16	14	13	17	16	17	16	20	17	18	18	15	19	16	19	17	16	16	18	14	15	15	17
chr1:99245902-99246787	Pab-Ppy-Ggod-Ggog-Gbeg-Ptrs-Ptrt-Ptre-Ptrv-Ppa-Hsa-Hde	885	LOC100129620	4	3	4	4	4	3	4	4	4	4	4	4	4	5	4	4	4	3	4	4	4	4	5	4	4	4	5	4	5	4	4	3	4	4	5	5	5	4	4	5	4	4	5	5	4	5
chr1:99891655-99895399	Pab-Ppy	3744	PALMD	2	4	2	2	4	4	2	2	2	2	1	2	2	2	2	1	2	4	2	2	2	2	2	3	1	2	1	4	2	3	2	4	2	2	2	2	1	2	2	1	2	2	1	2	2	2
chr1:99934134-99939709	Pab-Ppy-Ggod-Ggog-Gbeg-Ptrs-Ptrt-Ptre-Ptrv-Ppa-Hsa-Hde	5575		5	4	4	4	3	4	4	5	4	4	3	4	4	5	4	6	5	4	5	5	4	4	4	4	4	4	4	4	5	4	5	4	4	4	4	5	5	4	4	4	4	4	4	5	4	5
chr1:100060735-100062980	Ggod-Ggog-Gbeg-Ptrs-Ptrt-Ptre-Ptrv-Ppa-Hsa-Hde	2245		4	2	4	3	2	2	5	4	4	4	3	3	4	5	4	3	4	2	4	5	4	4	4	2	3	4	4	2	5	2	4	2	4	4	4	5	3	4	4	4	4	4	4	5	3	4
chr1:100080344-100081308	Pab-Ppy-Ggod-Ggog-Gbeg-Ptrs-Ptrt-Ptre-Ptrv-Ppa-Hsa-Hde	964		10	10	10	8	11	11	10	9	10	9	8	10	9	11	10	12	10	12	9	10	10	10	9	11	10	9	10	9	10	10	9	10	9	10	9	9	10	9	10	9	10	10	10	11	9	9
chr1:100824111-100828136	Pab-Ppy-Ggod-Ggog-Gbeg-Ptrs-Ptrt-Ptre-Ptrv-Ppa-Hsa-Hde	4025		7	8	7	7	7	8	8	7	6	7	6	7	7	7	7	7	7	7	8	8	7	7	7	7	7	7	7	7	6	8	8	8	7	6	7	8	6	7	7	7	7	7	7	7	7	7
chr1:100884589-100894415	Pab-Ppy-Ggod-Ggog-Gbeg-Ptrs-Ptrt-Ptre-Ptrv-Ppa-Hsa-Hde	9826	LOC100128787	5	6	4	4	7	5	5	4	4	4	4	4	5	5	5	7	5	7	5	5	5	5	4	6	5	4	5	6	5	6	4	5	5	5	5	4	4	5	4	4	4	4	4	6	5	5
chr1:101176558-101188537	Pab-Ppy-Ggod-Ggog-Gbeg-Ptrs-Ptrt-Ptre-Ptrv-Ppa-Hsa-Hde	11979	SLC30A7	9	9	8	8	9	9	8	10	8	11	9	8	9	10	8	11	9	10	11	8	9	10	8	10	11	11	9	9	11	10	8	9	8	8	11	8	12	9	8	9	8	8	11	10	10	10
chr1:101494489-101495679	Pab-Ppy-Ggod-Ggog-Gbeg-Ptrs-Ptrt-Ptre-Ptrv-Ppa-Hsa-Hde	1190		11	13	14	11	14	13	11	12	11	11	10	11	11	12	13	12	12	14	11	11	11	12	11	15	12	12	13	14	13	13	10	13	12	12	11	10	12	11	11	14	11	11	12	12	11	12
chr1:101502989-101517053	Pab-Ppy-Ggod-Ggog-Gbeg-Ptrs-Ptrt-Ptre-Ptrv-Ppa-Hsa-Hde	14064		21	23	21	21	22	22	21	22	20	22	18	20	21	23	21	22	21	23	23	20	20	19	22	23	22	20	23	21	22	22	21	23	20	20	22	20	20	22	20	22	20	21	22	24	22	23
chr1:102023122-102025480	Pab-Ppy-Ggod-Ggog-Gbeg-Ptrs-Ptrt-Ptre-Ptrv-Ppa-Hsa-Hde	2358		30	52	36	37	41	50	39	36	34	34	27	35	32	32	38	34	34	44	40	39	34	33	32	46	30	31	31	42	39	45	38	51	33	33	36	39	33	38	32	31	31	32	32	33	36	36
chr1:102118127-102120672	Pab-Ppy-Ggod-Ggog-Gbeg-Ptrs-Ptrt-Ptre-Ptrv-Ppa-Hsa-Hde	2545	OLFM3,MIR548AI,DNAJA1P5	8	5	9	10	6	6	10	8	8	7	6	11	9	8	10	7	8	5	7	9	8	7	9	5	8	7	9	6	8	6	10	5	10	9	8	9	8	8	10	8	9	8	8	7	7	8
chr1:102646530-102649259	Pab-Ppy-Ggod-Ggog-Gbeg-Ptrs-Ptrt-Ptre-Ptrv-Ppa-Hsa-Hde	2729		4	5	4	4	5	4	4	5	4	5	4	5	5	5	5	6	5	5	4	4	5	5	4	5	6	5	5	4	4	5	5	5	5	5	5	5	5	5	4	5	4	5	5	5	4	4
chr1:103897808-103902126	Pab-Ppy-Ggod-Ggog-Gbeg-Ptrs-Ptrt-Ptre-Ptrv-Ppa-Hsa-Hde	4318	RNPC3,AMY2B	3	5	4	4	5	6	3	4	3	3	3	3	3	7	3	2	3	5	4	3	3	3	3	4	4	3	4	5	4	5	4	6	3	3	4	4	3	3	4	3	3	3	4	7	4	4
chr1:103913851-103923779	Pab-Ppy-Ggod-Ggog-Gbeg-Ptrs-Ptrt-Ptre-Ptrv-Ppa-Hsa-Hde	9928	AMY2B,ACTG1P4	4	8	5	5	8	8	5	6	5	5	4	5	4	9	5	5	5	7	6	5	4	5	5	6	5	5	5	7	5	7	6	8	4	5	6	5	5	5	5	5	5	4	6	10	6	6
chr1:103930578-103932105	Pab-Ppy	1527		2	5	2	2	4	5	2	2	2	2	1	2	1	2	2	2	2	5	2	2	2	2	2	4	2	2	1	5	2	5	2	5	2	2	2	3	2	2	2	2	2	2	2	2	2	2
chr1:103932105-103954585	Pab-Ppy-Ggod-Ggog-Gbeg-Ptrs-Ptrt-Ptre-Ptrv-Ppa-Hsa-Hde	22480		4	7	3	4	7	8	4	4	4	4	4	3	3	8	4	3	3	7	4	4	4	3	3	6	3	3	4	7	3	7	4	8	3	4	4	4	3	3	4	4	4	3	5	8	4	4
chr1:103958555-103977588	Pab-Ppy-Ggod-Ggog-Gbeg-Ptrs-Ptrt-Ptre-Ptrv-Ppa-Hsa-Hde	19033	AMY2A	4	8	4	5	8	8	5	5	4	4	4	4	4	10	4	4	4	8	5	5	4	4	4	6	4	4	5	7	4	7	5	8	4	4	5	5	4	4	4	4	4	4	6	10	5	5
chr1:103999711-104050191	Pab-Ppy-Ggod-Ggog-Gbeg-Ptrs-Ptrt-Ptre-Ptrv-Ppa-Hsa-Hde	50480	AMY1A,AMY1B,AMY1C,AMY1B,AMY1C,AMY1A	4	7	4	4	7	7	4	5	4	4	3	4	4	12	4	4	4	7	5	4	4	4	4	5	4	4	4	7	4	6	4	7	4	4	6	5	4	4	4	4	4	4	5	13	5	6
chr1:104055933-104070740	Pab-Ppy-Ggod-Ggog-Gbeg-Ptrs-Ptrt-Ptre-Ptrv-Ppa-Hsa-Hde	14807		4	8	4	4	8	9	5	5	4	4	3	4	4	10	4	5	4	8	5	5	4	4	4	6	5	4	4	7	4	7	4	8	4	4	5	5	4	4	4	4	4	4	5	10	5	5
chr1:104084183-104110887	Pab-Ppy-Ggod-Ggog-Gbeg-Ptrs-Ptrt-Ptre-Ptrv-Ppa-Hsa-Hde	26704	AMY1B,AMY1C,AMY1A	4	7	4	4	7	7	4	5	4	4	3	4	4	11	4	4	4	6	6	5	4	4	4	5	4	4	4	6	4	6	4	7	4	4	5	5	4	4	4	4	4	4	5	13	5	5
chr1:104663186-104765315	ils_clades_CHIMP-BONOBO-EASTERN_GORILLA-WESTERN_GORILLA	102129		6	2	5	6	1	2	6	6	6	5	5	6	6	2	6	5	6	2	6	6	6	6	6	2	5	6	5	2	5	2	6	2	5	6	7	6	6	6	6	6	6	5	6	2	7	7
chr1:104768953-104782942	ils_clades_CHIMP-BONOBO-EASTERN_GORILLA-WESTERN_GORILLA	13989		6	2	5	5	2	2	6	7	5	5	4	6	5	2	6	4	6	2	6	6	6	5	6	2	5	6	6	2	6	2	6	2	5	6	7	5	6	6	6	5	6	5	6	2	7	7
chr1:105049574-105054570	Pab-Ppy-Ggod-Ggog-Gbeg-Ptrs-Ptrt-Ptre-Ptrv-Ppa-Hsa-Hde	4996		6	6	4	5	5	5	6	5	5	5	4	5	5	6	5	5	5	5	5	5	5	5	6	6	5	5	4	6	5	6	6	5	5	5	5	6	5	6	5	4	5	5	6	5	6	5
chr1:106233859-106235227	Pab-Ppy-Ggod-Ggog-Gbeg-Ptrs-Ptrt-Ptre-Ptrv-Ppa-Hsa-Hde	1368		4	5	6	5	4	5	5	6	5	5	5	5	6	6	5	6	6	5	6	5	5	5	5	5	5	5	6	4	6	5	5	5	5	5	6	5	5	5	5	5	5	5	6	6	6	6
chr1:107147219-107150042	Pab-Ppy-Ggod-Ggog-Gbeg-Ptrs-Ptrt-Ptre-Ptrv-Ppa-Hsa-Hde	2823		4	4	3	4	4	4	4	4	4	4	4	4	3	4	4	4	3	4	4	4	4	4	4	3	5	5	4	4	4	4	4	4	3	3	4	4	4	4	3	4	4	3	4	5	4	4
chr1:107849367-107850093	Pab-Ppy-Ggod-Ggog-Gbeg-Ptrs-Ptrt-Ptre-Ptrv-Ppa-Hsa-Hde	726		6	5	5	4	6	5	6	6	4	6	5	4	4	5	4	4	5	6	6	5	4	6	4	5	6	7	4	5	6	5	5	5	5	5	6	5	6	4	4	4	4	4	6	6	6	6
chr1:108557165-108559181	Ggod-Ggog-Gbeg-Ptrs-Ptrt-Ptre-Ptrv-Ppa-Hsa-Hde	2016		4	2	5	4	2	3	5	4	4	5	4	5	5	5	4	4	5	2	4	4	4	5	4	2	5	5	5	2	5	2	4	2	4	4	4	4	4	4	5	5	4	5	5	5	4	5
chr1:108565446-108590243	Pab-Ppy-Ggod-Ggog-Gbeg-Ptrs-Ptrt-Ptre-Ptrv-Ppa-Hsa-Hde	24797	NBPF4	5	5	7	7	4	5	8	5	7	5	4	7	7	7	7	7	7	4	5	8	7	5	7	4	4	4	7	4	4	4	8	5	7	7	5	8	5	7	7	7	7	7	5	8	5	5
chr1:108590243-108590941	Ggod-Ggog-Gbeg-Ptrs-Ptrt-Ptre-Ptrv-Ppa-Hsa-Hde	698		4	2	5	5	2	2	5	4	4	4	3	5	4	8	5	4	4	2	3	5	4	4	5	2	3	3	4	1	4	2	5	2	5	4	4	6	3	4	5	4	5	5	3	9	4	4
chr1:108590941-108656882	Hsa	65941		2	2	2	2	2	2	2	2	2	2	2	2	2	3	2	2	2	2	2	2	2	2	2	2	2	2	2	2	2	2	2	2	2	2	2	2	2	2	2	2	2	2	2	4	2	2
chr1:108714325-108727465	Pab-Ppy-Ggod-Ggog-Gbeg-Ptrs-Ptrt-Ptre-Ptrv-Ppa-Hsa-Hde	13140		8	5	9	8	5	5	10	7	10	7	7	10	10	10	10	9	9	5	7	10	10	7	11	5	7	6	10	5	7	5	10	5	9	9	7	10	8	10	10	9	10	10	8	10	8	8
chr1:108728509-108778771	Hsa	50262		2	2	2	2	1	2	2	2	2	2	2	2	2	3	2	1	1	2	2	2	2	2	2	1	2	2	2	2	2	2	2	2	2	2	2	2	1	2	2	2	2	1	2	5	2	2
chr1:108779708-108815085	Pab-Ppy-Ggod-Ggog-Gbeg-Ptrs-Ptrt-Ptre-Ptrv-Ppa-Hsa-Hde	35377	NBPF6	5	5	7	7	4	5	8	5	7	5	4	7	7	7	7	7	7	4	5	8	7	5	7	4	5	5	7	4	5	4	8	5	7	7	5	8	5	7	7	7	7	7	5	8	5	5
chr1:108845602-108853088	Pab-Ppy-Ggod-Ggog-Gbeg-Ptrs-Ptrt-Ptre-Ptrv-Ppa-Hsa-Hde	7486		5	6	5	5	6	6	5	5	5	6	5	5	5	5	5	7	5	6	5	5	5	5	5	6	5	6	5	5	5	6	5	6	5	5	6	5	6	5	5	5	5	5	5	6	5	5
chr1:109333761-109339143	Pab-Ppy-Ggod-Ggog-Gbeg-Ptrs-Ptrt-Ptre-Ptrv-Ppa-Hsa-Hde	5382	WDR47	16	15	19	17	14	15	18	17	18	16	13	17	17	17	17	24	17	16	18	18	16	18	17	15	17	17	17	14	19	15	16	14	17	16	18	19	17	17	17	17	16	16	16	17	17	17
chr1:109374143-109375377	Pab-Ppy-Ggod-Ggog-Gbeg-Ptrs-Ptrt-Ptre-Ptrv-Ppa-Hsa-Hde	1234	WDR47	9	8	7	6	9	8	7	9	6	9	9	6	8	9	6	8	7	9	9	7	7	9	6	10	10	8	7	8	9	7	6	9	7	7	9	6	11	6	7	7	7	6	10	9	9	8
chr1:109391141-109394482	Pab-Ppy-Ggod-Ggog-Gbeg-Ptrs-Ptrt-Ptre-Ptrv-Ppa-Hsa-Hde	3341		3	4	4	3	4	4	4	5	4	3	3	3	3	4	4	4	3	4	5	3	3	3	4	4	3	3	4	4	3	4	3	4	3	3	4	3	3	4	3	3	3	3	5	4	5	4
chr1:109404392-109408827	Ggod-Ggog-Gbeg	4435	TAF13	2	2	5	3	2	2	3	2	4	2	2	3	4	2	4	4	4	2	2	3	3	2	4	2	3	2	4	2	2	2	3	2	3	3	2	3	2	3	3	4	3	4	2	3	2	2
chr1:109686872-109765951	ils_clades_CHIMP-BONOBO-EASTERN_GORILLA-WESTERN_GORILLA	79079	SORT1,PSMA5	6	2	9	8	2	2	8	6	8	6	6	8	8	2	8	8	8	2	6	8	8	8	8	2	6	6	8	2	6	2	8	2	8	8	6	8	6	8	8	8	8	8	6	2	6	6
chr1:109935422-109936258	Pab-Ppy-Ggod-Ggog-Gbeg-Ptrs-Ptrt-Ptre-Ptrv-Ppa-Hsa-Hde	836	GNAI3	4	5	5	5	4	4	5	5	4	5	4	5	5	5	5	5	5	4	5	5	5	5	4	4	5	4	6	4	5	5	4	5	5	5	5	4	5	5	5	6	5	4	4	5	5	5
chr1:109994232-109997686	Pab-Ppy-Ggod-Ggog-Gbeg-Ptrs-Ptrt-Ptre-Ptrv-Ppa-Hsa-Hde	3454		13	14	18	15	12	14	17	14	16	13	11	16	17	16	16	19	18	12	14	16	16	13	16	14	13	12	17	11	14	13	17	15	16	16	14	17	15	17	16	15	15	16	14	16	14	14
chr1:110004816-110005743	Pab-Ppy-Ggod-Ggog-Gbeg-Ptrs-Ptrt-Ptre-Ptrv-Ppa-Hsa-Hde	927	GSTM4	6	8	7	7	6	7	6	7	6	4	4	6	5	6	5	7	6	5	7	7	6	5	6	7	6	6	6	8	5	7	7	7	5	5	6	6	6	7	5	6	6	6	6	6	7	7
chr1:110012657-110060843	Pab-Ppy-Ggod-Ggog-Gbeg-Ptrs-Ptrt-Ptre-Ptrv-Ppa-Hsa-Hde	48186	GSTM2,GSTM1,GSTM5	4	4	4	4	3	3	4	4	4	2	3	4	4	5	4	4	4	3	4	4	4	3	4	4	3	3	4	4	3	3	4	3	4	4	4	4	4	4	4	4	4	4	4	3	4	5
chr1:110638361-110641397	Pab-Ppy-Ggod-Ggog-Gbeg-Ptrs-Ptrt-Ptre-Ptrv-Ppa-Hsa-Hde	3036	LOC440600	6	8	8	7	6	8	8	6	7	6	5	8	8	6	8	8	8	7	7	8	8	6	7	7	6	6	8	6	7	7	8	8	8	8	7	8	7	8	8	7	7	8	6	7	6	6
chr1:110690259-110690969	Pab-Ppy-Ggod-Ggog-Gbeg-Ptrs-Ptrt-Ptre-Ptrv-Ppa-Hsa-Hde	710	RBM15	4	4	4	4	4	3	4	4	3	3	3	4	4	4	4	4	4	4	4	3	3	4	3	4	4	3	4	4	4	4	3	4	3	3	3	4	4	3	3	3	3	4	4	4	4	4
chr1:111191404-111192862	Pab-Ppy-Ggod-Ggog-Gbeg-Ptrs-Ptrt-Ptre-Ptrv-Ppa-Hsa-Hde	1458		7	7	8	7	7	6	8	6	8	7	6	8	8	9	8	7	8	6	6	8	8	6	8	7	6	6	8	7	7	6	8	6	7	7	6	8	7	7	7	7	8	8	6	8	6	6
chr1:111722688-111725807	Pab-Ppy-Ggod-Ggog-Gbeg-Ptrs-Ptrt-Ptre-Ptrv-Ppa-Hsa-Hde	3119		8	9	10	9	7	8	8	10	10	9	7	10	10	9	9	9	10	7	10	9	9	9	10	7	9	9	10	8	10	7	9	8	10	10	10	9	11	10	9	9	9	9	10	10	11	9
chr1:111803640-111805667	Pab-Ppy-Ggod-Ggog-Gbeg-Ptrs-Ptrt-Ptre-Ptrv-Ppa-Hsa-Hde	2027	ATP5F1	4	4	3	3	3	4	4	4	4	4	3	3	3	4	4	4	3	4	4	3	3	3	4	3	4	4	3	4	3	4	4	4	3	3	5	3	4	3	3	4	3	3	4	4	4	5
chr1:111992105-111993878	Pab-Ppy-Ggod-Ggog-Gbeg-Ptrs-Ptrt-Ptre-Ptrv-Ppa-Hsa-Hde	1773	RAP1A	13	15	13	14	14	15	14	13	12	13	11	12	13	13	13	14	12	13	13	13	13	12	13	14	12	14	13	13	14	15	13	16	13	13	13	13	12	15	13	13	12	12	12	13	13	13
chr1:113014057-113015842	Pab-Ppy-Ggod-Ggog-Gbeg-Ptrs-Ptrt-Ptre-Ptrv-Ppa-Hsa-Hde	1785	CAPZA1	4	6	5	4	5	6	4	5	4	4	4	4	3	5	4	4	4	5	5	4	4	5	4	5	5	6	5	5	5	4	4	6	4	5	5	4	5	4	4	4	4	4	4	5	5	5
chr1:113092297-113092797	Pab-Ppy-Ggod-Ggog-Gbeg-Ptrs-Ptrt-Ptre-Ptrv-Ppa-Hsa-Hde	500		5	6	5	4	6	6	5	5	5	4	4	4	5	5	5	5	5	5	5	5	5	5	5	6	4	4	5	6	6	6	5	6	5	5	5	5	5	5	5	5	5	5	5	5	4	5
chr1:113230147-113247668	Pab-Ppy-Ggod-Ggog-Gbeg-Ptrs-Ptrt-Ptre-Ptrv-Ppa-Hsa-Hde	17521		8	8	8	7	9	9	7	8	7	8	7	8	8	9	8	10	7	10	8	8	7	8	7	9	8	8	8	8	8	8	7	8	7	8	8	8	8	8	8	8	8	8	8	9	7	8
chr1:113267779-113268579	Pab-Ppy-Ggod-Ggog-Gbeg-Ptrs-Ptrt-Ptre-Ptrv-Ppa-Hsa-Hde	800	SLC16A1,AKR7A2P1	5	5	4	4	5	5	4	5	4	5	4	3	3	5	4	3	4	5	4	5	4	5	4	5	5	5	4	5	6	4	4	5	4	3	4	3	5	4	4	4	3	4	4	5	5	5
chr1:113368824-113442336	Ptrs-Ptrt-Ptre-Ptrv-Ppa	73512	LRIG2	4	2	2	2	2	2	2	4	2	4	3	2	2	2	2	2	2	2	4	2	2	4	2	2	4	4	2	2	4	2	2	2	2	2	4	2	4	2	2	2	2	2	4	2	4	5
chr1:113442336-113463535	ils_clades_CHIMP-BONOBO-EASTERN_GORILLA-WESTERN_GORILLA	21199	LRIG2	6	2	9	8	2	2	8	7	8	6	6	8	8	2	8	8	8	2	7	8	8	9	8	2	7	7	8	2	8	2	7	2	8	7	7	8	7	8	8	9	8	9	7	2	8	9
chr1:113463535-113465982	Ptrs-Ptrt-Ptre-Ptrv-Ppa	2447	LRIG2	5	2	2	2	2	2	2	8	2	6	6	2	2	2	2	2	2	3	8	2	2	8	2	2	8	6	2	2	9	2	2	2	2	2	7	2	7	2	2	2	2	2	7	3	8	8
chr1:113481084-113513072	ils_clades_CHIMP-BONOBO-EASTERN_GORILLA-WESTERN_GORILLA	31988		8	2	7	8	2	2	7	9	7	8	8	7	7	2	7	8	7	2	8	8	7	10	7	2	8	8	8	2	8	2	7	2	6	7	9	8	9	7	7	7	7	7	9	2	10	10
chr1:113513072-113513683	Pab-Ppy-Ggod-Ggog-Gbeg-Ptrs-Ptrt-Ptre-Ptrv-Ppa-Hsa-Hde	611		7	3	7	7	3	3	9	8	6	6	7	8	7	4	7	7	6	4	6	7	7	9	7	3	6	7	7	3	7	3	9	3	7	6	6	7	7	6	7	6	7	7	7	3	8	8
chr1:113513683-113542409	ils_clades_CHIMP-BONOBO-EASTERN_GORILLA-WESTERN_GORILLA	28726	LOC643441	6	2	6	6	2	2	7	7	6	6	6	6	6	2	6	6	6	2	6	6	6	8	6	2	6	6	6	2	7	2	6	2	6	6	8	6	7	6	7	6	6	6	7	2	8	8
chr1:113542409-113543616	Pab-Ppy-Ggod-Ggog-Gbeg-Ptrs-Ptrt-Ptre-Ptrv-Ppa-Hsa-Hde	1207	LOC643441	7	3	9	7	3	3	8	8	8	8	8	7	8	4	7	8	7	3	6	8	8	9	7	3	7	8	7	4	6	3	7	3	7	7	8	7	8	7	8	7	7	7	9	3	7	9
chr1:113543616-113621230	ils_clades_CHIMP-BONOBO-EASTERN_GORILLA-WESTERN_GORILLA	77614	LOC643441	4	2	6	6	2	2	6	5	5	4	3	6	6	2	5	5	5	2	4	6	5	4	5	2	4	4	6	2	4	2	6	2	6	6	5	6	5	5	5	5	5	6	5	2	6	6
chr1:113701906-113793377	ils_clades_CHIMP-BONOBO-EASTERN_GORILLA-WESTERN_GORILLA	91471	MAGI3	6	2	6	6	2	2	6	7	6	6	5	6	6	2	6	6	6	2	6	6	6	6	6	2	6	6	6	2	6	2	6	2	6	6	7	6	6	6	6	6	6	6	7	2	8	8
chr1:113793377-113795383	Pab-Ppy-Ggod-Ggog-Gbeg-Ptrs-Ptrt-Ptre-Ptrv-Ppa-Hsa-Hde	2006	MAGI3	12	11	13	13	11	11	13	14	11	12	11	13	14	11	13	15	14	11	13	13	14	13	12	12	13	13	14	11	13	11	13	11	13	13	13	13	14	13	13	13	12	13	13	11	13	13
chr1:113795383-113853206	ils_clades_CHIMP-BONOBO-EASTERN_GORILLA-WESTERN_GORILLA	57823	MAGI3	6	2	6	5	2	2	6	7	6	6	5	6	6	2	6	5	6	2	6	6	6	6	6	2	6	6	6	2	6	2	6	2	6	6	7	6	6	6	6	6	6	6	6	2	8	7
chr1:113853206-113854023	Pab-Ppy-Ggod-Ggog-Gbeg-Ptrs-Ptrt-Ptre-Ptrv-Ppa-Hsa-Hde	817	MAGI3	6	6	6	6	5	6	6	6	6	5	5	6	6	8	6	7	7	7	6	5	7	6	6	7	6	5	7	6	6	6	7	6	7	7	6	5	6	6	7	7	6	7	6	9	6	6
chr1:113854023-113881758	ils_clades_CHIMP-BONOBO-EASTERN_GORILLA-WESTERN_GORILLA	27735	MAGI3	6	2	5	6	2	2	6	7	6	5	5	6	6	2	6	6	6	2	6	6	6	6	6	2	5	6	5	2	5	2	6	2	6	6	7	6	6	6	5	6	6	6	7	2	8	7
chr1:113881758-113890366	Ggod-Ggog-Gbeg	8608	MAGI3	2	2	6	6	2	2	6	2	6	2	2	6	6	2	6	6	6	2	2	6	5	2	6	2	2	2	6	2	2	2	6	2	6	6	2	7	2	6	6	6	6	5	2	2	2	2
chr1:113890366-113907807	ils_clades_CHIMP-BONOBO-EASTERN_GORILLA-WESTERN_GORILLA	17441	MAGI3	3	2	6	6	2	2	7	4	5	4	3	6	6	2	6	5	6	2	5	6	5	3	6	2	3	3	5	2	3	2	6	2	5	6	4	6	3	5	6	5	6	6	3	2	3	4
chr1:113907807-113908676	ils_clades_CHIMP-BONOBO-WESTERN_GORILLA	869	MAGI3	3	2	3	3	2	3	5	5	4	4	3	4	4	2	4	5	4	2	6	3	4	4	2	2	3	4	3	2	3	2	5	2	3	4	4	4	4	4	4	3	4	4	4	2	4	4
chr1:113951969-113994636	ils_clades_CHIMP-BONOBO-EASTERN_GORILLA-WESTERN_GORILLA	42667	MAGI3	3	2	6	5	2	2	6	4	5	4	3	6	6	2	6	6	6	2	5	6	6	4	5	2	4	4	6	2	3	2	6	2	5	6	4	6	4	6	6	5	6	6	4	2	4	4
chr1:114086058-114090727	Ggod-Ggog-Gbeg	4669	PHTF1	2	2	4	3	2	2	3	2	3	2	2	4	3	2	3	3	3	2	2	3	3	2	3	2	2	2	4	2	2	2	3	2	3	3	2	4	2	4	3	3	3	3	2	3	2	2
chr1:114804215-114806021	Pab-Ppy-Ggod-Ggog-Gbeg-Ptrs-Ptrt-Ptre-Ptrv-Ppa-Hsa-Hde	1806	TRIM33	5	6	6	6	6	5	6	6	6	5	4	5	6	6	6	8	6	6	5	6	6	5	6	6	5	5	6	6	5	6	6	6	6	5	6	5	6	6	6	6	5	6	5	6	5	5
chr1:114878995-114882410	Pab-Ppy-Ggod-Ggog-Gbeg-Ptrs-Ptrt-Ptre-Ptrv-Ppa-Hsa-Hde	3415		3	5	4	4	5	4	5	4	4	4	3	3	4	4	4	4	4	4	5	5	3	4	4	4	4	4	4	4	3	5	4	5	4	4	4	4	4	5	4	4	3	4	4	4	5	4
chr1:115047916-115049710	Pab-Ppy-Ggod-Ggog-Gbeg-Ptrs-Ptrt-Ptre-Ptrv-Ppa-Hsa-Hde	1794	NRAS	4	5	4	4	5	4	4	3	4	4	3	4	4	4	4	3	4	4	4	4	4	4	4	4	4	4	5	5	4	4	4	5	3	4	4	4	4	4	4	4	4	4	4	4	4	4
chr1:115257974-115260157	Pab-Ppy-Ggod-Ggog-Gbeg-Ptrs-Ptrt-Ptre-Ptrv-Ppa-Hsa-Hde	2183	SYCP1	3	4	3	3	4	4	4	4	4	4	3	4	3	4	3	4	4	4	4	4	4	4	4	4	3	4	3	3	3	4	4	4	3	4	3	4	4	4	3	3	4	3	4	4	4	4
chr1:115908756-115910902	Pab-Ppy-Ggod-Ggog-Gbeg-Ptrs-Ptrt-Ptre-Ptrv-Ppa-Hsa-Hde	2146		4	4	3	3	4	5	4	4	3	4	4	4	4	4	4	4	4	3	4	4	3	4	3	3	4	3	3	3	5	3	4	4	4	4	4	4	4	4	4	4	3	4	4	4	3	4
chr1:116191067-116201880	Pab-Ppy-Ggod-Ggog-Gbeg-Ptrs-Ptrt-Ptre-Ptrv-Ppa-Hsa-Hde	10813		34	32	28	28	28	32	31	33	26	35	31	27	28	31	27	23	28	28	35	29	27	36	28	30	33	34	27	27	38	29	30	31	27	28	35	29	31	27	27	26	26	28	33	34	32	32
chr1:116537793-116538293	Pab-Ppy-Ggod-Ggog-Gbeg-Ptrs-Ptrt-Ptre-Ptrv-Ppa-Hsa-Hde	500		3	6	4	5	4	5	5	5	4	4	4	4	4	4	5	4	5	5	5	5	4	4	4	5	3	3	5	4	5	4	5	5	4	4	5	5	4	5	5	4	4	4	3	4	4	4
chr1:116933312-116971784	Ggod-Ggog-Gbeg-Ptrs-Ptrt-Ptre-Ptrv-Ppa-Hsa-Hde	38472	IGSF3	4	2	59	62	2	2	66	4	55	4	3	54	66	6	59	64	52	2	4	53	62	4	62	2	4	4	51	2	4	2	66	2	62	55	4	58	2	66	55	71	54	60	4	6	4	4
chr1:116971784-116972380	Pab-Ppy-Ggod-Ggog-Gbeg-Ptrs-Ptrt-Ptre-Ptrv-Ppa-Hsa-Hde	596	IGSF3	4	3	7	5	3	3	6	5	6	5	4	8	7	12	5	6	8	4	5	6	9	4	6	3	4	4	6	2	4	4	9	3	4	3	4	6	4	7	5	5	6	8	4	8	5	5
chr1:116972380-116986473	Ggod-Ggog-Gbeg-Ptrs-Ptrt-Ptre-Ptrv-Ppa-Hsa-Hde	14093	IGSF3	4	2	5	4	2	2	4	4	5	4	3	7	6	10	4	5	6	2	4	4	6	4	5	2	4	4	5	2	4	2	7	2	4	3	4	4	4	5	5	4	5	6	4	6	4	4
chr1:116986973-117006685	Ptrs-Ptrt-Ptre-Ptrv-Ppa-Hsa-Hde	19712	IGSF3	4	2	2	2	2	2	2	4	2	4	3	2	2	12	2	2	2	2	4	2	2	4	2	2	4	4	2	2	4	2	2	2	2	2	4	2	4	2	2	2	2	2	4	8	4	4
chr1:117057800-117061895	Pab-Ppy-Ggod-Ggog-Gbeg-Ptrs-Ptrt-Ptre-Ptrv-Ppa-Hsa-Hde	4095		8	11	8	9	8	10	11	9	9	8	7	7	8	8	9	8	8	8	10	10	9	7	9	9	8	9	8	8	8	10	10	11	8	9	9	10	8	10	8	9	8	8	8	8	10	9
chr1:117482483-117483485	Pab-Ppy-Ggod-Ggog-Gbeg-Ptrs-Ptrt-Ptre-Ptrv-Ppa-Hsa-Hde	1002		7	7	6	7	8	7	7	7	6	7	6	7	7	7	6	8	7	8	7	6	6	6	6	7	7	6	7	6	8	7	6	8	6	7	7	7	7	7	6	6	6	7	7	6	7	7
chr1:118950415-118959448	Pab-Ppy-Ggod-Ggog-Gbeg-Ptrs-Ptrt-Ptre-Ptrv-Ppa-Hsa-Hde	9033		5	6	4	4	6	6	5	5	5	5	4	5	5	6	5	6	5	7	5	5	5	4	5	6	5	4	5	6	4	6	5	6	5	5	5	5	5	5	5	5	4	5	5	6	5	5
chr1:119429179-119430548	Pab-Ppy-Ggod-Ggog-Gbeg-Ptrs-Ptrt-Ptre-Ptrv-Ppa-Hsa-Hde	1369	WARS2	4	5	4	3	3	5	4	4	4	3	3	4	4	4	4	4	4	5	4	5	4	4	3	4	4	4	4	4	4	4	4	4	4	4	4	4	4	4	4	4	3	4	3	4	3	4
chr1:119460306-119472023	Pab-Ppy-Ggod-Ggog-Gbeg-Ptrs-Ptrt-Ptre-Ptrv-Ppa-Hsa-Hde	11717	WARS2	15	13	15	14	11	14	15	21	15	17	15	14	16	15	14	20	14	13	22	14	15	17	15	13	16	16	17	11	16	11	14	13	15	15	19	14	17	15	15	15	14	15	20	16	20	19
chr1:119563558-119564058	Pab-Ppy-Ggod-Ggog-Gbeg-Ptrs-Ptrt-Ptre-Ptrv-Ppa-Hsa-Hde	500		11	11	9	9	9	11	11	16	10	11	10	9	10	10	10	12	9	10	14	12	10	11	10	10	11	10	10	11	12	11	10	12	10	9	14	11	11	10	10	9	9	10	15	9	14	16
chr1:119761549-119790599	Pab-Ppy-Ggod-Ggog-Gbeg-Ptrs-Ptrt-Ptre-Ptrv-Ppa-Hsa-Hde	29050	HSD3B2	4	4	3	4	4	4	4	4	4	3	3	4	4	4	4	4	4	4	4	4	4	4	3	4	4	3	3	3	3	4	4	4	4	3	4	4	4	4	4	4	4	4	4	4	4	4
chr1:119793053-119806240	Pab-Ppy-Ggod-Ggog-Gbeg-Ptrs-Ptrt-Ptre-Ptrv-Ppa-Hsa-Hde	13187		3	4	3	4	3	3	4	3	3	3	3	3	3	4	4	4	3	3	3	3	3	4	3	3	3	3	3	3	3	3	4	4	3	3	4	3	3	3	3	3	3	3	3	4	4	3
chr1:119806740-119808702	Ggod-Ggog-Gbeg-Ptrs-Ptrt-Ptre-Ptrv-Ppa-Hsa-Hde	1962		4	2	4	4	2	2	4	4	4	4	3	3	4	4	4	4	3	1	4	3	4	3	4	2	4	4	4	2	2	2	4	2	4	4	4	4	3	4	3	4	3	4	4	4	4	4
chr1:119808702-119818173	Pab-Ppy-Ggod-Ggog-Gbeg-Ptrs-Ptrt-Ptre-Ptrv-Ppa-Hsa-Hde	9471		4	4	4	4	5	4	4	4	4	3	3	4	4	4	4	4	4	4	4	4	4	3	4	4	4	4	4	4	3	4	4	4	4	4	4	4	4	4	4	4	4	4	4	4	4	4
chr1:119824845-119827794	Pab-Ppy-Ggod-Ggog-Gbeg-Ptrs-Ptrt-Ptre-Ptrv-Ppa-Hsa-Hde	2949		4	5	3	4	4	5	4	4	4	4	3	4	4	4	4	4	4	4	5	4	4	4	4	4	4	5	4	4	4	4	4	5	4	4	5	4	4	4	4	4	4	4	4	5	5	4
chr1:119839863-119849278	Pab-Ppy-Ggod-Ggog-Gbeg-Ptrs-Ptrt-Ptre-Ptrv-Ppa-Hsa-Hde	9415		5	7	5	6	6	6	6	6	7	5	5	6	6	6	6	7	5	5	7	6	7	6	6	6	6	6	6	5	5	7	6	7	6	7	7	6	6	7	6	6	5	6	6	6	7	6
chr1:119858208-119859901	Pab-Ppy-Ggod-Ggog-Gbeg-Ptrs-Ptrt-Ptre-Ptrv-Ppa-Hsa-Hde	1693	HSD3B1	5	6	5	6	5	6	6	5	6	5	4	5	5	5	5	5	5	6	5	5	6	5	6	5	5	5	5	5	4	6	6	6	5	6	6	6	5	5	5	6	5	6	5	6	6	6
chr1:119884387-119886576	Pab-Ppy-Ggod-Ggog-Gbeg-Ptrs-Ptrt-Ptre-Ptrv-Ppa-Hsa-Hde	2189		4	4	3	3	4	5	4	4	3	4	3	4	4	4	3	4	3	4	4	3	4	4	4	4	4	4	3	4	4	4	4	5	4	3	4	4	4	4	3	4	3	4	4	5	4	4
chr1:119892949-119963309	Pab-Ppy-Ggod-Ggog-Gbeg-Ptrs-Ptrt-Ptre-Ptrv-Ppa-Hsa-Hde	70360	HSD3BP4,LOC644242	4	5	4	5	4	5	4	4	4	4	3	4	4	5	4	4	4	4	5	4	4	4	4	4	4	4	4	4	4	5	4	5	4	4	5	4	4	4	4	4	4	4	4	5	4	4
chr1:120171600-120207529	Pab-Ppy-Ggod-Ggog-Gbeg-Ptrs-Ptrt-Ptre-Ptrv-Ppa-Hsa-Hde	35929	NBPF7	8	9	11	10	9	9	10	8	10	8	7	10	9	13	10	11	11	10	8	10	11	8	11	9	8	8	12	9	7	9	10	9	11	9	8	11	9	11	9	9	11	11	7	11	8	8
chr1:120333113-120416266	Ggod-Ggog-Gbeg-Ptrs-Ptrt-Ptre-Ptrv-Ppa-Hsa-Hde	83153	NOTCH2	6	2	6	7	2	2	7	6	6	6	5	6	7	11	6	7	7	2	7	7	7	6	6	2	7	6	6	2	6	2	7	2	6	6	6	7	6	6	6	7	6	7	6	10	7	7
chr1:120416266-120419016	Ptrs-Ptrt-Ptre-Ptrv-Ppa-Hsa-Hde	2750		6	1	2	2	1	2	2	6	2	5	5	2	2	11	2	1	3	2	6	2	2	7	2	2	5	5	2	1	7	1	3	2	2	2	6	2	5	2	2	2	2	2	4	10	5	6
chr1:120419016-120498197	Ggod-Ggog-Gbeg-Ptrs-Ptrt-Ptre-Ptrv-Ppa-Hsa-Hde	79181		4	2	6	6	2	2	6	4	6	4	4	6	6	7	6	6	6	2	4	6	6	5	6	2	4	4	6	2	5	2	6	2	6	6	4	6	4	6	6	6	5	6	4	7	5	5
chr1:120548600-120579311	Hsa-Hde	30711		2	2	2	2	2	2	2	2	2	2	2	2	2	7	2	2	2	2	2	2	2	2	2	2	2	2	2	2	2	2	2	2	2	2	2	2	2	2	2	2	2	2	2	8	2	2
chr1:120586970-120591760	Pab-Ppy-Ggod-Ggog-Gbeg-Ptrs-Ptrt-Ptre-Ptrv-Ppa-Hsa-Hde	4790		10	14	14	14	17	15	16	8	16	9	7	16	17	17	16	18	16	15	8	17	15	8	16	18	10	8	17	16	8	15	16	13	16	15	8	16	8	16	16	14	16	15	8	19	8	8
chr1:120596917-120689145	Hsa-Hde	92228	FAM72B	2	2	2	2	2	2	2	2	2	2	2	2	2	9	2	2	2	2	2	2	2	2	2	2	2	2	2	2	2	2	2	2	2	2	2	2	2	2	2	2	2	2	2	9	2	2
chr1:120689145-120703373	Pab-Ppy-Ggod-Ggog-Gbeg-Ptrs-Ptrt-Ptre-Ptrv-Ppa-Hsa-Hde	14228		4	4	4	4	4	4	3	4	4	4	3	4	3	9	4	4	4	4	4	4	4	4	4	4	4	4	4	5	5	5	4	5	4	3	4	4	4	4	4	4	4	4	3	9	4	4
chr1:120703373-120707185	Hsa-Hde	3812		2	2	2	2	2	2	2	2	2	2	1	2	2	6	2	2	2	2	2	2	2	2	2	2	2	2	2	2	2	2	2	2	2	2	2	2	2	2	2	2	2	2	2	6	2	2
chr1:120707185-120708433	Pab-Ppy-Ggod-Ggog-Gbeg-Ptrs-Ptrt-Ptre-Ptrv-Ppa-Hsa-Hde	1248	HIST2H2BA	6	7	6	5	7	6	5	5	6	6	5	5	7	11	6	6	6	6	6	4	6	6	6	6	6	6	6	7	7	7	5	7	7	7	6	4	7	6	6	6	6	6	6	11	6	6
chr1:120708433-120738397	Hsa-Hde	29964	HIST2H2BA,FCGR1B	2	2	2	2	2	2	2	2	2	2	2	2	2	7	2	2	2	2	2	2	2	2	2	2	2	2	2	2	2	2	2	2	2	2	2	2	2	2	2	2	2	2	2	7	2	2
chr1:120789505-120833868	Hsa-Hde	44363		2	2	2	2	2	2	2	2	2	2	2	2	2	8	2	2	2	2	2	2	2	2	2	2	2	2	2	2	2	2	2	2	2	2	2	2	2	2	2	2	2	2	2	8	2	2
chr1:120833868-120851257	Pab-Ppy-Ggod-Ggog-Gbeg-Ptrs-Ptrt-Ptre-Ptrv-Ppa-Hsa-Hde	17389		56	5	50	48	4	5	50	57	49	55	45	46	48	111	51	51	47	5	55	50	47	55	46	4	57	55	54	3	60	4	51	5	50	49	58	54	54	51	51	48	47	47	58	105	58	56
chr1:120851257-120863420	ils_clades_HUMAN-ORANGUTAN-WESTERN_GORILLA	12163		1	4	4	3	3	4	4	1	3	1	1	3	3	3	3	3	3	3	2	4	3	1	3	3	1	1	3	3	1	4	3	4	3	3	1	3	1	3	3	3	3	3	2	4	1	1
chr1:120885854-120888485	Pab-Ppy	2631		0	4	2	2	3	4	2	2	2	2	2	2	2	2	2	2	2	3	2	2	2	2	2	3	2	2	2	3	2	3	2	4	2	2	2	2	2	2	2	2	2	2	2	2	2	3
chr1:120900125-120901449	Pab-Ppy-Ggod-Ggog-Gbeg-Ptrs-Ptrt-Ptre-Ptrv-Ppa-Hsa-Hde	1324		2	4	3	4	3	4	4	4	4	4	3	4	4	5	4	4	4	4	3	4	4	4	4	4	4	4	4	4	4	4	4	4	4	4	4	4	3	4	4	4	4	4	4	4	4	4
chr1:120936664-120938450	ils_clades_HUMAN-ORANGUTAN-EASTERN_GORILLA-WESTERN_GORILLA	1786		2	4	4	5	4	4	5	2	3	2	2	4	3	4	3	4	4	4	2	5	4	2	4	4	2	2	4	4	2	4	4	4	4	3	2	4	2	4	4	4	4	4	2	4	2	2
chr1:120964057-120968751	ils_clades_HUMAN-ORANGUTAN-EASTERN_GORILLA-WESTERN_GORILLA	4694	EMBP1	2	4	5	4	3	5	5	2	5	2	2	4	4	5	4	4	4	3	2	5	4	2	5	4	2	2	4	4	3	4	5	5	4	4	2	5	2	4	4	4	4	4	2	5	2	2
chr1:120968751-120973541	ils_clades_HUMAN-ORANGUTAN-WESTERN_GORILLA	4790	EMBP1	1	4	3	3	3	4	4	1	3	1	1	4	4	4	4	3	3	4	1	4	3	1	3	4	1	2	4	3	1	3	4	4	3	3	2	4	1	3	3	3	4	4	1	4	1	2
chr1:120973541-120982259	Pab-Ppy-Ggod-Ggog-Gbeg-Ptrs-Ptrt-Ptre-Ptrv-Ppa-Hsa-Hde	8718	EMBP1	4	6	5	6	5	5	6	5	5	3	2	5	5	5	6	3	5	5	4	6	5	3	5	4	3	3	5	5	3	5	5	5	5	5	4	7	3	5	5	5	5	6	3	6	3	3
chr1:120990022-120990876	ils_clades_HUMAN-ORANGUTAN-WESTERN_GORILLA	854	EMBP1	1	4	3	3	3	4	3	2	3	2	1	3	3	4	4	4	3	3	2	3	3	2	3	3	2	2	4	3	1	4	3	3	3	3	2	3	1	3	3	3	3	3	2	4	2	2
chr1:120990876-121012625	ils_clades_HUMAN-ORANGUTAN-EASTERN_GORILLA-WESTERN_GORILLA	21749	EMBP1	2	4	3	4	4	4	4	2	3	2	1	4	4	4	4	4	3	3	2	4	3	2	4	3	2	2	4	3	1	4	4	4	3	4	2	4	1	4	3	3	3	4	2	4	2	2
chr1:141476696-141485527	ils_clades_HUMAN-CHIMP-BONOBO-ORANGUTAN	8831		24	2	1	2	4	2	1	21	2	24	20	1	1	23	1	2	1	4	20	1	1	20	2	2	32	21	3	3	21	3	1	2	1	1	20	1	24	1	0	2	2	1	23	27	22	22
chr1:141583742-141671015	Pab-Ppy-Ggod-Ggog-Gbeg-Ptrs-Ptrt-Ptre-Ptrv-Ppa-Hsa-Hde	87273	ANKRD20A12P	41	5	9	9	6	6	9	33	9	34	27	9	10	48	9	8	9	6	36	10	9	31	10	6	43	36	10	6	36	6	9	5	9	9	36	9	36	10	9	8	9	9	29	50	34	29
chr1:141725431-141734518	Pab-Ppy-Ggod-Ggog-Gbeg-Ptrs-Ptrt-Ptre-Ptrv-Ppa-Hsa-Hde	9087		22	5	4	3	6	5	4	20	3	25	19	3	3	42	4	4	3	8	23	4	3	23	4	9	30	28	3	5	23	5	5	4	4	4	23	3	18	3	4	4	3	3	25	43	21	17
chr1:141734518-141738007	Ggod-Ggog-Gbeg-Ptrs-Ptrt-Ptre-Ptrv-Ppa-Hsa-Hde	3489		22	2	4	3	2	2	4	19	3	24	19	4	3	33	3	4	3	2	21	4	3	22	4	2	24	26	3	2	23	2	4	2	4	4	20	4	18	3	5	3	4	4	23	38	19	16
chr1:141740639-141808418	Pab-Ppy-Ggod-Ggog-Gbeg-Ptrs-Ptrt-Ptre-Ptrv-Ppa-Hsa-Hde	67779		38	5	9	9	6	6	9	28	9	32	24	8	9	47	9	8	8	5	32	10	8	29	9	6	38	32	9	6	33	6	9	5	9	8	31	10	31	9	9	8	8	9	28	50	30	26
chr1:141958927-141959427	ils_clades_HUMAN-CHIMP-BONOBO-ORANGUTAN	500		15	3	1	1	4	2	0	11	1	31	28	0	1	18	0	5	1	9	11	0	0	23	1	5	55	22	3	3	18	3	0	2	1	0	11	0	55	1	0	3	1	1	26	17	12	10
chr1:141982508-142079888	Pab-Ppy-Ggod-Ggog-Gbeg-Ptrs-Ptrt-Ptre-Ptrv-Ppa-Hsa-Hde	97380		39	5	8	9	6	6	9	30	8	32	25	8	9	46	9	8	8	6	34	9	8	29	9	6	39	33	8	5	34	6	9	5	9	9	33	9	35	9	9	8	8	8	27	49	32	28
chr1:142082088-142094137	Pab-Ppy-Ggod-Ggog-Gbeg-Ptrs-Ptrt-Ptre-Ptrv-Ppa-Hsa-Hde	12049		22	7	3	3	11	5	3	20	3	24	23	3	4	39	4	4	4	16	23	4	3	23	4	16	35	27	4	6	24	6	4	4	3	3	22	4	21	3	4	3	3	3	29	42	22	18
chr1:142094137-142120276	Ggod-Ggog-Gbeg-Ptrs-Ptrt-Ptre-Ptrv-Ppa-Hsa-Hde	26139		21	2	5	4	2	2	4	21	3	27	21	5	5	44	4	5	6	2	25	4	5	23	4	2	28	28	5	2	22	2	5	2	4	5	23	3	21	4	5	5	5	5	25	51	24	18
chr1:142120276-142128108	Pab-Ppy-Ggod-Ggog-Gbeg-Ptrs-Ptrt-Ptre-Ptrv-Ppa-Hsa-Hde	7832		2009	571	1122	1019	473	318	804	2989	983	1703	1768	959	1089	578	854	1304	1064	427	3238	952	1074	1560	922	309	2890	1403	1174	378	1947	503	793	368	1116	1026	2648	890	2639	1232	1029	1179	1249	1222	2999	551	2919	2637
chr1:142185737-142272165	Pab-Ppy-Ggod-Ggog-Gbeg-Ptrs-Ptrt-Ptre-Ptrv-Ppa-Hsa-Hde	86428		38	5	9	9	6	6	9	28	9	32	25	9	9	47	9	8	9	5	31	10	9	28	10	6	39	33	9	6	32	6	10	5	9	9	30	10	31	10	9	8	9	9	28	50	29	25
chr1:142437334-142512694	Pab-Ppy-Ggod-Ggog-Gbeg-Ptrs-Ptrt-Ptre-Ptrv-Ppa-Hsa-Hde	75360	LOC100130000,FLJ39739,LOC100286793	5	7	5	6	7	7	5	5	6	5	4	5	5	8	5	6	6	7	5	6	6	5	5	7	5	5	6	7	6	7	6	7	6	5	4	6	5	6	6	6	6	6	4	8	4	5
chr1:142518109-142561577	Pab-Ppy-Ggod-Ggog-Gbeg-Ptrs-Ptrt-Ptre-Ptrv-Ppa-Hsa-Hde	43468	FLJ39739,LOC100286793,PPIAL4G	5	4	4	4	4	4	5	6	4	5	4	4	4	16	4	4	4	4	6	4	4	5	4	4	5	5	4	4	5	4	4	4	4	4	5	4	5	4	4	4	4	4	5	15	6	6
chr1:142617059-142673142	Hsa-Hde	56083	SRGAP2B	2	2	2	2	2	2	2	2	2	2	2	2	2	9	2	2	2	2	2	2	2	2	2	2	2	2	2	2	2	2	2	2	2	2	2	2	2	2	2	2	2	2	2	9	2	2
chr1:142673142-142680141	Pab-Ppy-Ggod-Ggog-Gbeg-Ptrs-Ptrt-Ptre-Ptrv-Ppa-Hsa-Hde	6999	SRGAP2B	9	15	13	14	16	17	13	8	14	8	7	14	15	16	13	16	15	15	8	13	14	7	13	17	9	8	15	16	8	16	12	15	15	14	8	13	8	13	15	14	15	13	8	18	8	8
chr1:142685513-142807279	Hsa-Hde	121766	SRGAP2B	2	2	2	2	2	2	2	2	2	2	2	2	2	7	2	2	2	2	2	2	2	2	2	2	2	2	2	2	2	2	2	2	2	2	2	2	2	2	2	2	2	2	2	7	2	2
chr1:142858098-142936050	Pab-Ppy-Ggod-Ggog-Gbeg-Ptrs-Ptrt-Ptre-Ptrv-Ppa-Hsa-Hde	77952		48	16	77	88	16	16	88	57	85	65	46	97	83	324	92	113	88	16	60	86	74	52	87	16	49	54	105	15	47	16	90	16	120	78	57	83	54	105	83	83	80	77	51	323	68	62
chr1:142985550-143001845	Pab-Ppy-Ggod-Ggog-Gbeg-Ptrs-Ptrt-Ptre-Ptrv-Ppa-Hsa-Hde	16295		4	7	5	5	6	7	5	4	5	4	3	5	5	8	5	5	6	6	4	5	5	4	5	7	4	4	5	6	4	6	5	7	5	5	4	5	4	5	5	4	5	6	4	9	4	4
chr1:143001845-143007446	Ggod-Ggog-Gbeg-Ptrs-Ptrt-Ptre-Ptrv-Ppa-Hsa-Hde	5601		3	2	4	4	2	2	3	3	3	4	3	4	3	5	4	4	4	2	4	4	3	4	4	2	3	3	3	2	4	2	4	2	4	3	4	4	3	4	4	3	4	4	4	5	4	4
chr1:143007446-143016973	Pab-Ppy-Ggod-Ggog-Gbeg-Ptrs-Ptrt-Ptre-Ptrv-Ppa-Hsa-Hde	9527	LOC728855,LOC728875	7	10	12	10	9	9	10	6	9	8	7	11	10	9	10	12	8	10	6	12	10	7	10	10	7	8	13	9	7	9	10	9	11	9	6	12	9	9	9	11	12	10	6	9	6	8
chr1:143016973-143022990	ils_clades_HUMAN-CHIMP-ORANGUTAN-EASTERN_GORILLA-WESTERN_GORILLA	6017	LOC728855,LOC728875	3	3	4	4	4	3	4	2	4	3	3	4	4	9	4	4	4	4	2	3	4	3	4	4	3	4	5	4	4	3	3	3	5	4	2	3	3	3	4	4	4	4	2	8	2	2
chr1:143022990-143086471	Pab-Ppy-Ggod-Ggog-Gbeg-Ptrs-Ptrt-Ptre-Ptrv-Ppa-Hsa-Hde	63481	LOC728855,LOC728875,PPIAL4A,PPIAL4B,PPIAL4C	5	4	4	4	4	4	5	5	4	5	4	4	4	15	4	4	4	4	6	5	4	5	4	4	5	5	4	4	6	4	4	4	4	4	5	5	5	4	4	4	4	4	5	15	5	6
[truncated: 10,756 more rows]
[truncated: 46 more columns]

## Sheet: S4 - expansions
Table S4 - Lineage specific expansions identified against the human reference genome Build 36
[truncated: 7,237 more rows]
[truncated: 46 more columns]

## Sheet: S5 - fixed dels in NHP refs
Table S5 - Lineage specific deletions identified against the chimpanzee, gorilla and orangutan reference genomes
[truncated: 5,778 more rows]

[truncated: 6 more sheets: S6 - Gorilla CNV genotypes, S7 - Bonobo CNV genoytpes, S8 - Chimpanzee CNV genotypes, S9 - Human CNV genotypes, S10 - Sumatran CNV genotypes , S11 - Bornean CNV genotypes]
